# Supplementary material
Source: PubMed Central journal article supplement (PMC8115961)
Supplement: Neuropathic_Pain_Appendix_1.pdf [file Neuropathic_Pain_Appendix_1.pdf]

**PEER Systematic Review of Randomized Controlled Trials:  
Management of Chronic Neuropathic Pain in Primary Care  
Appendix 1: Search Terms and PRISMA diagrams**

Jamison Falk, Betsy Thomas, Jessica Kirkwood, Christina S. Korownyk, Adrienne J. Lindblad, Joey Ton, Samantha Moe, G. Michael Allan, James McCormack, Scott Garrison, Nicolas Dugré, Karenn Chan, Michael R. Kolber, Anthony Train, Liesbeth Froentjes, Logan Sept, Michael Wollin, Rodger Craig, Danielle Perry

# Table of Contents

|                                                          |           |
|----------------------------------------------------------|-----------|
| <b>Search Strategies.....</b>                            | <b>3</b>  |
| <b>MEDLINE/COCHRANE .....</b>                            | <b>3</b>  |
| Acupuncture .....                                        | 3         |
| Anticonvulsants .....                                    | 3         |
| Exercise.....                                            | 4         |
| Lidocaine.....                                           | 5         |
| Opioids.....                                             | 6         |
| Rubefaciants.....                                        | 6         |
| SNRIs.....                                               | 7         |
| TCAs .....                                               | 8         |
| <b>EMBASE .....</b>                                      | <b>10</b> |
| Acupuncture .....                                        | 10        |
| Anticonvulsants .....                                    | 10        |
| Exercise.....                                            | 11        |
| Lidocaine.....                                           | 12        |
| Opioids.....                                             | 12        |
| Rubefaciants.....                                        | 13        |
| SNRIs.....                                               | 14        |
| TCAs .....                                               | 15        |
| <b>PRISMA Figures .....</b>                              | <b>16</b> |
| <b>Figure 1: PRISMA study flow: Acupuncture.....</b>     | <b>16</b> |
| <b>Figure 2: PRISMA study flow: Anticonvulsants.....</b> | <b>17</b> |
| <b>Figure 3: PRISMA study flow: Exercise.....</b>        | <b>18</b> |
| <b>Figure 4: PRISMA study flow: Lidocaine.....</b>       | <b>19</b> |
| <b>Figure 5: PRISMA study flow: Opioids .....</b>        | <b>20</b> |
| <b>Figure 6: PRISMA study flow: Rubefaciants .....</b>   | <b>21</b> |
| <b>Figure 7: PRISMA study flow: SNRIs .....</b>          | <b>22</b> |
| <b>Figure 8: PRISMA study flow: TCAs.....</b>            | <b>23</b> |

## Search Strategies

### MEDLINE/COCHRANE

#### Acupuncture

1. randomized controlled trial.pt.
2. clinical trial.pt.
3. randomi?ed.ti,ab.
4. placebo.ti,ab.
5. dt.fs.
6. randomly.ti,ab.
7. trial.ti,ab.
8. groups.ti,ab.
9. or/1-8
10. animals/
11. humans/
12. 10 not (10 and 11)
13. 9 not 12
14. neuropathic pain.mp. or exp Neuralgia/
15. diabetic neuropath\*.mp. or exp Diabetic Neuropathies/
16. (post-herpetic neur\* or postherpetic neur\*).mp. [mp=title, abstract, original title, name of substance word, subject heading word, floating sub-heading word, keyword heading word, organism supplementary concept word, protocol supplementary concept word, rare disease supplementary concept word, unique identifier, synonyms]
17. exp Neuralgia, Postherpetic/
18. exp Trigeminal Neuralgia/ or trigeminal neur\*.mp.
19. exp Radiculopathy/ or radiculopath\*.mp.
20. (neuralgia or allodynia or causalgia).mp.
21. ((pain\* or discomfort\*) adj3 (nerv\* or neuralg\* or neuropath\*)).mp.
22. 14 or 15 or 16 or 17 or 18 or 19 or 20 or 21
23. acupuncture therapy/ or acupuncture analgesia/
24. acupunct\*.mp.
25. acupoint\*.mp.
26. Acupuncture Points/
27. 23 or 24 or 25 or 26
28. 13 and 22 and 27

#### Anticonvulsants

1. randomized controlled trial.pt.
2. clinical trial.pt.
3. randomi?ed.ti,ab.
4. placebo.ti,ab.
5. dt.fs.
6. randomly.ti,ab.
7. trial.ti,ab.
8. groups.ti,ab.
9. or/1-8
10. animals/
11. humans/
12. 10 not (10 and 11)
13. 9 not 12

14. neuropathic pain.mp. or exp Neuralgia/
15. diabetic neuropath\*.mp. or exp Diabetic Neuropathies/
16. (post-herpetic neur\* or postherpetic neur\*).mp. [mp=title, abstract, original title, name of substance word, subject heading word, floating sub-heading word, keyword heading word, organism supplementary concept word, protocol supplementary concept word, rare disease supplementary concept word, unique identifier, synonyms]
17. exp Neuralgia, Postherpetic/
18. exp Trigeminal Neuralgia/ or trigeminal neur\*.mp.
19. exp Radiculopathy/ or radiculopath\*.mp.
20. (neuralgia or allodynia or causalgia).mp.
21. ((pain\* or discomfort\*) adj3 (nerv\* or neuralg\* or neuropath\*)).mp.
22. 14 or 15 or 16 or 17 or 18 or 19 or 20 or 21
23. anticonvulsant\*.ti,ab,kw. or exp \*Anticonvulsants/
24. gabapentin.mp. or exp \*Gabapentin/
25. neurontin.ti,ab,kw.
26. pregabalin.mp. or exp \*Pregabalin/
27. lyrica.ti,ab,kw.
28. oxcarbazepine.mp. or exp \*Oxcarbazepine/
29. carbamazepine.mp. or exp \*Carbamazepine/
30. topiramate.mp. or exp \*Topiramate/
31. (trileptal or tegretol or topimax).ti,ab,kw.
32. 23 or 24 or 25 or 26 or 27 or 28 or 29 or 30 or 31
33. 13 and 22 and 32

## Exercise

1. randomized controlled trial.pt.
2. clinical trial.pt.
3. randomi?ed.ti,ab.
4. placebo.ti,ab.
5. dt.fs.
6. randomly.ti,ab.
7. trial.ti,ab.
8. groups.ti,ab.
9. or/1-8
10. animals/
11. humans/
12. 10 not (10 and 11)
13. 9 not 12
14. exp Exercise Movement Techniques/
15. exp Exercise Therapy/
16. exp Physical Exertion/
17. exercis\*.mp.
18. exp Physical Fitness/
19. exp Exercise Test/
20. exp Exercise Tolerance/
21. (physical\* adj2 endur\*).mp.
22. ((strength\* or isometric\* or isotonic\* or isokinetic\* or aerobic\* or endurance or weight\*) adj5 (exercis\* or train\*)).tw.
23. physiotherap\*.mp.
24. kinesiotherap\*.mp.
25. \*rehabilitation/ or occupational therapy/ or recreation therapy/
26. physical activity.mp. or exp Exercise/

27. muscle strength\*.mp.
28. neuropathic pain.mp. or exp Neuralgia/
29. diabetic neuropath\*.mp. or exp Diabetic Neuropathies/
30. (post-herpetic neur\* or postherpetic neur\*).mp. [mp=title, abstract, original title, name of substance word, subject heading word, floating sub-heading word, keyword heading word, organism supplementary concept word, protocol supplementary concept word, rare disease supplementary concept word, unique identifier, synonyms]
31. exp Neuralgia, Postherpetic/
32. exp Trigeminal Neuralgia/ or trigeminal neur\*.mp.
33. exp Radiculopathy/ or radiculopath\*.mp.
34. (neuralgia or allodynia or causalgia).mp.
35. ((pain\* or discomfort\*) adj3 (nerv\* or neuralg\* or neuropath\*)).mp.
36. 28 or 29 or 30 or 31 or 32 or 33 or 34 or 35
37. 14 or 15 or 16 or 17 or 18 or 19 or 20 or 21 or 22 or 23 or 24 or 25 or 26 or 27
38. 13 and 36 and 37

## Lidocaine

1. randomized controlled trial.pt.
2. clinical trial.pt.
3. randomi?ed.ti,ab.
4. placebo.ti,ab.
5. dt.fs.
6. randomly.ti,ab.
7. trial.ti,ab.
8. groups.ti,ab.
9. or/1-8
10. animals/
11. humans/
12. 10 not (10 and 11)
13. 9 not 12
14. neuropathic pain.mp. or exp Neuralgia/
15. diabetic neuropath\*.mp. or exp Diabetic Neuropathies/
16. (post-herpetic neur\* or postherpetic neur\*).mp. [mp=title, abstract, original title, name of substance word, subject heading word, floating sub-heading word, keyword heading word, organism supplementary concept word, protocol supplementary concept word, rare disease supplementary concept word, unique identifier, synonyms]
17. exp Neuralgia, Postherpetic/
18. exp Trigeminal Neuralgia/ or trigeminal neur\*.mp.
19. exp Radiculopathy/ or radiculopath\*.mp.
20. (neuralgia or allodynia or causalgia).mp.
21. ((pain\* or discomfort\*) adj3 (nerv\* or neuralg\* or neuropath\*)).mp.
22. 14 or 15 or 16 or 17 or 18 or 19 or 20 or 21
23. exp Anesthetics, Local/ or exp Lidocaine/ or lidocain\*.mp.
24. xylocain\*.mp.
25. (lidocaine or Lidocain or Lidocaina or Lidocainum or Lidokaiini or Lidokain or Lidokaina or Lidokainas or Lignocaina or Lignocaine).mp.
26. 23 or 24 or 25
27. exp Administration, Topical/ or topical\*.mp.
28. 26 and 27
29. 13 and 22 and 28

## Opioids

1. randomized controlled trial.pt.
2. clinical trial.pt.
3. randomi?ed.ti,ab.
4. placebo.ti,ab.
5. dt.fs.
6. randomly.ti,ab.
7. trial.ti,ab.
8. groups.ti,ab.
9. or/1-8
10. animals/
11. humans/
12. 10 not (10 and 11)
13. 9 not 12
14. neuropathic pain.mp. or exp Neuralgia/
15. diabetic neuropath\*.mp. or exp Diabetic Neuropathies/
16. (post-herpetic neur\* or postherpetic neur\*).mp. [mp=title, abstract, original title, name of substance word, subject heading word, floating sub-heading word, keyword heading word, organism supplementary concept word, protocol supplementary concept word, rare disease supplementary concept word, unique identifier, synonyms]
17. exp Neuralgia, Postherpetic/
18. exp Trigeminal Neuralgia/ or trigeminal neur\*.mp.
19. exp Radiculopathy/ or radiculopath\*.mp.
20. (neuralgia or allodynia or causalgia).mp.
21. ((pain\* or discomfort\*) adj3 (nerv\* or neuralg\* or neuropath\*)).mp.
22. (morphine or buprenorphine or codeine or dextromoramide or diphenoxylate or dipipanone or dextropropoxyphene or propoxyphene or diamorphine or dihydrocodeine or alfentanil or fentanyl or remifentanil or meptazinol or methadone or nalbuphine or oxycodone or papaveretum or pentazocine or meperidine or pethidine or phenazocine or hydrocodone or hydromorphone or levorphanol or oxymorphone or butorphanol or dezocine or sufentanil or ketobemidone or suboxone or buprenorphine-naloxone or hydrocodone or hysingla or zohydro or belbuca or buprenex or butrans or sublocade or probuphine or tramadol or conzip or ultram or durela or ralivia or tridural or zytram or duramorph or tapentadol or tramacet or kadian or hydromorph or oxyneo or nucynta or demerol or talwin).ti,ab,kw.
23. opioids.mp. or exp Analgesics, Opioid/
24. 22 or 23
25. 14 or 15 or 16 or 17 or 18 or 19 or 20 or 21
26. 13 and 24 and 25

## Rubefacients

1. randomized controlled trial.pt.
2. clinical trial.pt.
3. randomi?ed.ti,ab.
4. placebo.ti,ab.
5. dt.fs.
6. randomly.ti,ab.
7. trial.ti,ab.
8. groups.ti,ab.
9. or/1-8
10. animals/
11. humans/
12. 10 not (10 and 11)
13. 9 not 12

14. irritants.mp. or exp Irritants/ [mp=title, abstract, original title, name of substance word, subject heading word, floating sub-heading word, keyword heading word, organism supplementary concept word, protocol supplementary concept word, rare disease supplementary concept word, unique identifier, synonyms]
15. exp Capsaicin/
16. (rubefacient or counter-irritant or ammonium salicylate or radian B or benzyl nicotinate or kausalpunkt or pykaryl or rubriment or bornyl salicylate or camphor or choline salicylate or diethylamine salicylate or algesal or algoderm or algoflex or artogota or artogota or physiogestic or lloyd's cream or rheumagel or transvasin heat spray or diethyl salicylate or ethyl nicotinate or mucotherm or transvasin or PR heat spray or ethyl salicylate or glycol monosalicylate or ralnex or salonpas or intralgin or glycol salicylate or algipan rub or menthol or methyl butetisalicylate or doloderm or methyl gentisate or methyl nicotinate or nella red oil or wintergreen or sweet birch oil or methyl salicylate or aezodent or argesic or aspellin or balsosa or bengue's balsam or chymol emollient balm or deep heat or dencorub or dermacreme or dubam or eftab or exocaine or germolene or gone balm or gordogestic or linsal or metholatum or monophytol or nasciodine or phlogont rheuma or rheumabad or rheumax or salonair or thermo-rub or nicoboxil or finalgon or ortholan or nonivamide or Warne-pflaster or picolamine or salicylate or algiospray or reflex or propyl nicotinate or elacur or nicodan or salicylamide or isosal or salycilic or movelat or thurfyl salicylate or triethanolamine salicylate or analgesia creme or antiphlogistine or aspercreme or Ben-Gay or bexidermil or metsal or miosal or mobisyl or myoflex or progestic or roflex or sportscreme or topicrem or capsaicin or zostrix).mp. [mp=title, abstract, original title, name of substance word, subject heading word, floating sub-heading word, keyword heading word, organism supplementary concept word, protocol supplementary concept word, rare disease supplementary concept word, unique identifier, synonyms]
17. 14 or 15 or 16
18. exp Administration, topical/
19. (topical\* or cutaneous or dermal or transcutaneous or transdermal or percutaneous or skin or massage or embrocation or gel or ointment or aerosol or cream or creme or lotion or mousse or foam or liniment or spray or rub or balm or salve or emulsion or oil or patch or plaster).mp.
20. 18 or 19
21. 17 and 20
22. neuropathic pain.mp. or exp Neuralgia/
23. diabetic neuropath\*.mp. or exp Diabetic Neuropathies/
24. (post-herpetic neur\* or postherpetic neur\*).mp. [mp=title, abstract, original title, name of substance word, subject heading word, floating sub-heading word, keyword heading word, organism supplementary concept word, protocol supplementary concept word, rare disease supplementary concept word, unique identifier, synonyms]
25. exp Neuralgia, Postherpetic/
26. exp Trigeminal Neuralgia/ or trigeminal neur\*.mp.
27. exp Radiculopathy/ or radiculopath\*.mp.
28. (neuralgia or allodynia or causalgia).mp.
29. ((pain\* or discomfort\*) adj3 (nerv\* or neuralg\* or neuropath\*)).mp.
30. 22 or 23 or 24 or 25 or 26 or 27 or 28 or 29
31. 13 and 21 and 30

#### SNRIs

1. randomized controlled trial.pt.
2. clinical trial.pt.
3. randomi?ed.ti,ab.
4. placebo.ti,ab.
5. dt.fs.
6. randomly.ti,ab.
7. trial.ti,ab.
8. groups.ti,ab.
9. or/1-8

10. animals/
11. humans/
12. 10 not (10 and 11)
13. 9 not 12
14. SNRI.mp. or exp "Serotonin and Noradrenaline Reuptake Inhibitors"/
15. serotonin-norepinephrine reuptake inhibitor.mp.
16. cymbalta.mp.
17. savella.mp.
18. ixel.mp.
19. pristiq.mp.
20. effexor.mp.
21. desvenlafaxine.mp.
22. duloxetine.mp.
23. venlafaxine.mp.
24. milnacipran.mp.
25. reboxetine.mp.
26. edronax.mp.
27. viloxazine.mp.
28. vivalan.mp.
29. 14 or 15 or 16 or 17 or 18 or 19 or 20 or 21 or 22 or 23 or 24 or 25 or 26 or 27 or 28
30. neuropathic pain.mp. or exp Neuralgia/
31. diabetic neuropath\*.mp. or exp Diabetic Neuropathies/
32. (post-herpetic neur\* or postherpetic neur\*).mp. [mp=title, abstract, original title, name of substance word, subject heading word, floating sub-heading word, keyword heading word, organism supplementary concept word, protocol supplementary concept word, rare disease supplementary concept word, unique identifier, synonyms]
33. exp Neuralgia, Postherpetic/
34. exp Trigeminal Neuralgia/ or trigeminal neur\*.mp.
35. exp Radiculopathy/ or radiculopath\*.mp.
36. (neuralgia or allodynia or causalgia).mp.
37. ((pain\* or discomfort\*) adj3 (nerv\* or neuralg\* or neuropath\*)).mp.
38. 30 or 31 or 32 or 33 or 34 or 35 or 36 or 37
39. 13 and 29 and 38

#### TCAs

1. randomized controlled trial.pt.
2. clinical trial.pt.
3. randomi?ed.ti,ab.
4. placebo.ti,ab.
5. dt.fs.
6. randomly.ti,ab.
7. trial.ti,ab.
8. groups.ti,ab.
9. or/1-8
10. animals/
11. humans/
12. 10 not (10 and 11)
13. 9 not 12
14. exp Antidepressive Agents, Tricyclic/
15. tricyclic antidepressants.mp.
16. tricyclic anti-depressants.mp.
17. tca.mp.



18. amitriptyline.mp. or exp Amitriptyline/
19. amoxapine.mp. or exp Amoxapine/
20. anafranil.mp.
21. elavil.mp.
22. endep.mp.
23. clomipramine.mp. or exp Clomipramine/
24. c?lorimipramine.mp.
25. clomipramine hydrochloride.mp.
26. desipramine.mp. or exp Desipramine/
27. norpramin.mp.
28. dibenzepin.mp.
29. dosulepin.mp.
30. dothiepin.mp. or exp Dothiepin/
31. doxepin.mp. or exp Doxepin/
32. florpiramine.mp.
33. imipramine.mp. or exp Imipramine/
34. iprindole.mp. or exp Iprindole/
35. lofepramine.mp. or exp Lofepramine/
36. maprotiline.mp.
37. nortriptyline.mp. or exp Nortriptyline/
38. opipramol.mp.
39. pertofrane.mp.
40. prothiaden.mp.
41. protriptyline.mp. or exp Protriptyline/
42. trimipramine.mp. or exp Trimipramine/
43. tricyclic.mp.
44. adapin.mp.
45. sinequan.mp.
46. tofranil.mp.
47. feprapax.mp.
48. gamanil.mp.
49. lomont.mp.
50. pamelor.mp.
51. vivactil.mp.
52. surmontil.mp.
53. asendin.mp.
54. 14 or 15 or 16 or 17 or 18 or 19 or 20 or 21 or 22 or 23 or 24 or 25 or 26 or 27 or 28 or 29 or 30 or 31 or 32 or 33 or 34 or 35 or 36 or 37 or 38 or 39 or 40 or 41 or 42 or 43 or 44 or 45 or 46 or 47 or 48 or 49 or 50 or 51 or 52 or 53
55. neuropathic pain.mp. or exp Neuralgia/
56. diabetic neuropath\*.mp. or exp Diabetic Neuropathies/
57. (post-herpetic neur\* or postherpetic neur\*).mp. [mp=title, abstract, original title, name of substance word, subject heading word, floating sub-heading word, keyword heading word, organism supplementary concept word, protocol supplementary concept word, rare disease supplementary concept word, unique identifier, synonyms]
58. exp Neuralgia, Postherpetic/
59. exp Trigeminal Neuralgia/ or trigeminal neur\*.mp.
60. exp Radiculopathy/ or radiculopath\*.mp.
61. (neuralgia or allodynia or causalgia).mp.
62. ((pain\* or discomfort\*) adj3 (nerv\* or neuralg\* or neuropath\*)).mp.
63. 55 or 56 or 57 or 58 or 59 or 60 or 61 or 62
64. 13 and 54 and 63

## EMBASE

### Acupuncture

1. neuropathic pain.mp. or exp neuropathic pain/ or exp neuropathy/
2. exp diabetic neuropathy/ or diabetic neuropath\*.mp.
3. exp postherpetic neuralgia/ or exp neuralgia/
4. (post-herpetic neur\* or postherpetic neur\*).mp. [mp=title, abstract, heading word, drug trade name, original title, device manufacturer, drug manufacturer, device trade name, keyword, floating subheading word, candidate term word]
5. exp trigeminus neuralgia/ or exp Trigeminal Neuralgia/ or trigeminal neuralg\*.mp.
6. exp radiculopathy/ or radiculopath\*.mp.
7. ((pain\* or discomfort\*) adj3 (nerv\* or neuralg\* or neuropath\*)).mp. [mp=title, abstract, heading word, drug trade name, original title, device manufacturer, drug manufacturer, device trade name, keyword, floating subheading word, candidate term word]
8. 1 or 2 or 3 or 4 or 5 or 6 or 7
9. exp clinical trial/
10. randomi?ed.ti,ab.
11. placebo.ti,ab.
12. dt.fs.
13. randomly.ti,ab.
14. trial.ti,ab.
15. groups.ti,ab.
16. or/9-15
17. animal/
18. human/
19. 17 not (17 and 18)
20. 16 not 19
21. acupuncture.mp. or exp acupuncture analgesia/ or exp acupuncture/ or exp acupuncture point/ or exp acupuncture needle/
22. acupunct\*.mp.
23. 21 or 22
24. 8 and 20 and 23

### Anticonvulsants

1. neuropathic pain.mp. or exp neuropathic pain/ or exp neuropathy/
2. exp diabetic neuropathy/ or diabetic neuropath\*.mp.
3. exp postherpetic neuralgia/ or exp neuralgia/
4. (post-herpetic neur\* or postherpetic neur\*).mp. [mp=title, abstract, heading word, drug trade name, original title, device manufacturer, drug manufacturer, device trade name, keyword, floating subheading word, candidate term word]
5. exp trigeminus neuralgia/ or exp Trigeminal Neuralgia/ or trigeminal neuralg\*.mp.
6. exp radiculopathy/ or radiculopath\*.mp.
7. ((pain\* or discomfort\*) adj3 (nerv\* or neuralg\* or neuropath\*)).mp. [mp=title, abstract, heading word, drug trade name, original title, device manufacturer, drug manufacturer, device trade name, keyword, floating subheading word, candidate term word]
8. 1 or 2 or 3 or 4 or 5 or 6 or 7
9. exp clinical trial/
10. randomi?ed.ti,ab.
11. placebo.ti,ab.
12. dt.fs.
13. randomly.ti,ab.
14. trial.ti,ab.

15. groups.ti,ab.
16. or/9-15
17. animal/
18. human/
19. 17 not (17 and 18)
20. 16 not 19
21. anticonvulsant.ti,ab,kw. or exp \*anticonvulsive agent/
22. gabapentin.ti,ab,kw. or exp \*gabapentin enacarbil/ or exp \*gabapentin/
23. neurontin.ti,ab,kw.
24. pregabalin.ti,ab,kw. or exp \*pregabalin/
25. lyrica.ti,ab,kw.
26. oxcarbazepine.ti,ab,kw. or exp \*oxcarbazepine/
27. exp \*carbamazepine/ or carbamazepine.ti,ab,kw.
28. exp \*topiramate/ or topiramate.ti,ab,kw.
29. (trileptal or tegretol or topimax).ti,ab,kw.
30. 21 or 22 or 23 or 24 or 25 or 26 or 27 or 28 or 29
31. 8 and 20 and 30

### Exercise

1. neuropathic pain.mp. or exp neuropathic pain/ or exp neuropathy/
2. exp diabetic neuropathy/ or diabetic neuropath\*.mp.
3. exp postherpetic neuralgia/ or exp neuralgia/
4. (post-herpetic neur\* or postherpetic neur\*).mp. [mp=title, abstract, heading word, drug trade name, original title, device manufacturer, drug manufacturer, device trade name, keyword, floating subheading word, candidate term word]
5. exp trigeminus neuralgia/ or exp Trigeminal Neuralgia/ or trigeminal neuralg\*.mp.
6. exp radiculopathy/ or radiculopath\*.mp.
7. ((pain\* or discomfort\*) adj3 (nerv\* or neuralg\* or neuropath\*)).mp. [mp=title, abstract, heading word, drug trade name, original title, device manufacturer, drug manufacturer, device trade name, keyword, floating subheading word, candidate term word]
8. 1 or 2 or 3 or 4 or 5 or 6 or 7
9. exp clinical trial/
10. randomi?ed.ti,ab.
11. placebo.ti,ab.
12. dt.fs.
13. randomly.ti,ab.
14. trial.ti,ab.
15. groups.ti,ab.
16. or/9-15
17. animal/
18. human/
19. 17 not (17 and 18)
20. 16 not 19
21. exp \*exercise/ or exp \*aerobic exercise/ or exercis\*.ti,ab,kw. /freq=2
22. physical activity.ti,ab,kw. /freq=2 or exp \*physical activity/
23. ((strength\* or isometric\* or isotonic\* or isokinetic\* or aerobic\* or endurance or weight\*) adj5 (exercis\* or train\*)).tw.
24. \*rehabilitation/ or \*occupational therapy/
25. physiotherap\*.mp. or exp \*physiotherapy/
26. kinesiotherap\*.mp. or exp \*kinesiotherapy/
27. muscle strengthening.mp. or exp \*muscle training/
28. 21 or 22 or 23 or 24 or 25 or 26 or 27

29. 8 and 20 and 28

## Lidocaine

1. neuropathic pain.mp. or exp neuropathic pain/ or exp neuropathy/
2. exp diabetic neuropathy/ or diabetic neuropath\*.mp.
3. exp postherpetic neuralgia/ or exp neuralgia/
4. (post-herpetic neur\* or postherpetic neur\*).mp. [mp=title, abstract, heading word, drug trade name, original title, device manufacturer, drug manufacturer, device trade name, keyword, floating subheading word, candidate term word]
5. exp trigeminus neuralgia/ or exp Trigeminal Neuralgia/ or trigeminal neuralg\*.mp.
6. exp radiculopathy/ or radiculopath\*.mp.
7. ((pain\* or discomfort\*) adj3 (nerv\* or neuralg\* or neuropath\*)).mp. [mp=title, abstract, heading word, drug trade name, original title, device manufacturer, drug manufacturer, device trade name, keyword, floating subheading word, candidate term word]
8. 1 or 2 or 3 or 4 or 5 or 6 or 7
9. exp clinical trial/
10. randomi?ed.ti,ab.
11. placebo.ti,ab.
12. dt.fs.
13. randomly.ti,ab.
14. trial.ti,ab.
15. groups.ti,ab.
16. or/9-15
17. animal/
18. human/
19. 17 not (17 and 18)
20. 16 not 19
21. exp lidocaine ethobromide/ or exp lidocaine/ or lidocaine.mp.
22. xylocaine.mp.
23. local anesthetics.mp. or exp local anesthetic agent/
24. exp topical drug administration/ or topical.mp.
25. 21 or 22 or 23
26. 24 and 25
27. 8 and 20 and 26

## Opioids

1. neuropathic pain.mp. or exp neuropathic pain/ or exp neuropathy/
2. exp diabetic neuropathy/ or diabetic neuropath\*.mp.
3. exp postherpetic neuralgia/ or exp neuralgia/
4. (post-herpetic neur\* or postherpetic neur\*).mp. [mp=title, abstract, heading word, drug trade name, original title, device manufacturer, drug manufacturer, device trade name, keyword, floating subheading word, candidate term word]
5. exp trigeminus neuralgia/ or exp Trigeminal Neuralgia/ or trigeminal neuralg\*.mp.
6. exp radiculopathy/ or radiculopath\*.mp.
7. ((pain\* or discomfort\*) adj3 (nerv\* or neuralg\* or neuropath\*)).mp. [mp=title, abstract, heading word, drug trade name, original title, device manufacturer, drug manufacturer, device trade name, keyword, floating subheading word, candidate term word]
8. 1 or 2 or 3 or 4 or 5 or 6 or 7
9. exp clinical trial/
10. randomi?ed.ti,ab.
11. placebo.ti,ab.
12. dt.fs.

13. randomly.ti,ab.
14. trial.ti,ab.
15. groups.ti,ab.
16. or/9-15
17. animal/
18. human/
19. 17 not (17 and 18)
20. 16 not 19
21. opioids.ti,ab,kw. or exp \*opiate/
22. (morphine or buprenorphine or codeine or dextromoramide or diphenoxylate or dipipanone or dextropropoxyphene or propoxyphene or diamorphine or dihydrocodeine or alfentanil or fentanyl or remifentanyl or meptazinol or methadone or nalbuphine or oxycodone or papaveretum or pentazocine or meperidine or pethidine or phenazocine or hydrocodone or hydromorphone or levorphanol or oxymorphone or butorphanol or dezocine or sufentanil or ketobemidone or suboxone or buprenorphine-naloxone or hydrocodone or hysingla or zohydro or belbuca or buprenex or butrans or sublocade or probuphine or tramadol or conzip or ultram or durela or ralivia or tridural or zytram or duramorph or tapentadol or tramacet or kadian or hydromorph or oxyneo or nucynta or demerol or talwin).ti,ab,kw.
23. 21 or 22
24. 8 and 20 and 23

## Rubefacients

1. neuropathic pain.mp. or exp neuropathic pain/ or exp neuropathy/
2. exp diabetic neuropathy/ or diabetic neuropath\*.mp.
3. exp postherpetic neuralgia/ or exp neuralgia/
4. (post-herpetic neur\* or postherpetic neur\*).mp. [mp=title, abstract, heading word, drug trade name, original title, device manufacturer, drug manufacturer, device trade name, keyword, floating subheading word, candidate term word]
5. exp trigeminus neuralgia/ or exp Trigeminal Neuralgia/ or trigeminal neuralg\*.mp.
6. exp radiculopathy/ or radiculopath\*.mp.
7. ((pain\* or discomfort\*) adj3 (nerv\* or neuralg\* or neuropath\*)).mp. [mp=title, abstract, heading word, drug trade name, original title, device manufacturer, drug manufacturer, device trade name, keyword, floating subheading word, candidate term word]
8. 1 or 2 or 3 or 4 or 5 or 6 or 7
9. exp clinical trial/
10. randomi?ed.ti,ab.
11. placebo.ti,ab.
12. dt.fs.
13. randomly.ti,ab.
14. trial.ti,ab.
15. groups.ti,ab.
16. or/9-15
17. animal/
18. human/
19. 17 not (17 and 18)
20. 16 not 19
21. irritants.mp. or exp irritant agent/
22. capsaicin.mp. or exp \*capsaicin/
23. (rubefacient or counter-irritant or ammonium salicylate or radian B or benzyl nicotinate or kausalpunkt or pykaryl or rubriment or bornyl salicylate or camphor or choline salicylate or diethylamine salicylate or algosal or algoderm or algoflex or artogota or artogota or physiogesic or lloyd's cream or rheumagel or transvasin heat spray or diethyl salicylate or ethyl nicotinate or mucotherm or transvasin or PR heat spray or ethyl salicylate or glycol monosalicylate or ralnex or salonpas or intralgin or glycol salicylate or algipan rub or

menthol or methyl butetisalicylate or doloderm or methyl gentisate or methyl nicotinate or nella red oil or wintergreen or sweet birch oil or methyl salicylate or aezodent or argesic or aspellin or balmosa or bengue's balsam or chymol emollient balm or deep heat or dencorub or dermacreme or dubam or eftab or exocaine or germolene or gone balm or gordogesic or linsal or metholatum or monophytol or nasciodine or phlogont rheuma or rheumabad or rheumax or salonair or thermo-rub or nicoboxil or finalgon or ortholan or nonivamide or Warne-pflaster or picolamine or salicylate or algiospray or reflex or propyl nicotinate or elacur or nicodan or salicylamide or isosal or salycilic or movelat or thurfyl salicylate or triethanolamine salicylate or analgesia creme or antiphlogistine or aspercreme or Ben-Gay or bexidermil or metsal or miosal or mobisyl or myoflex or progestic or royflex or sportscreme or topicrem or capsaicin or zostrix).ti,ab,kw.

24. exp topical drug administration/ or topical.mp.

25. (topical\* or cutaneous or dermal or transcutaneous or transdermal or percutaneous or skin or massage or embrocation or gel or ointment or aerosol or cream or creme or lotion or mousse or foam or liniment or spray or rub or balm or salve or emulsion or oil or patch or plaster).ti,ab,kw.

26. 24 or 25

27. 21 or 22 or 23

28. 26 and 27

29. 8 and 20 and 28

## SNRIs

1. neuropathic pain.mp. or exp neuropathic pain/ or exp neuropathy/

2. exp diabetic neuropathy/ or diabetic neuropath\*.mp.

3. exp postherpetic neuralgia/ or exp neuralgia/

4. (post-herpetic neur\* or postherpetic neur\*).mp. [mp=title, abstract, heading word, drug trade name, original title, device manufacturer, drug manufacturer, device trade name, keyword, floating subheading word, candidate term word]

5. exp trigeminus neuralgia/ or exp Trigeminal Neuralgia/ or trigeminal neuralg\*.mp.

6. exp radiculopathy/ or radiculopath\*.mp.

7. ((pain\* or discomfort\*) adj3 (nerv\* or neuralg\* or neuropath\*)).mp. [mp=title, abstract, heading word, drug trade name, original title, device manufacturer, drug manufacturer, device trade name, keyword, floating subheading word, candidate term word]

8. 1 or 2 or 3 or 4 or 5 or 6 or 7

9. exp clinical trial/

10. randomi?ed.ti,ab.

11. placebo.ti,ab.

12. dt.fs.

13. randomly.ti,ab.

14. trial.ti,ab.

15. groups.ti,ab.

16. or/9-15

17. animal/

18. human/

19. 17 not (17 and 18)

20. 16 not 19

21. snri.ti,ab,kw. or exp \*serotonin noradrenalin reuptake inhibitor/

22. serotonin-norepinephrine reuptake inhibitor.mp.

23. (cymbalta or savella or ixel or pristiq or effexor or desvenlafaxine or duloxetine or venlafaxine or milnacipran or reboxetine or edronax or viloxazine or vivalan).ti,ab,kw.

24. 21 or 22 or 23

25. 8 and 20 and 24

## TCAs

1. neuropathic pain.mp. or exp neuropathic pain/ or exp neuropathy/
2. exp diabetic neuropathy/ or diabetic neuropath\*.mp.
3. exp postherpetic neuralgia/ or exp neuralgia/
4. (post-herpetic neur\* or postherpetic neur\*).mp. [mp=title, abstract, heading word, drug trade name, original title, device manufacturer, drug manufacturer, device trade name, keyword, floating subheading word, candidate term word]
5. exp trigeminus neuralgia/ or exp Trigeminal Neuralgia/ or trigeminal neuralg\*.mp.
6. exp radiculopathy/ or radiculopath\*.mp.
7. ((pain\* or discomfort\*) adj3 (nerv\* or neuralg\* or neuropath\*)).mp. [mp=title, abstract, heading word, drug trade name, original title, device manufacturer, drug manufacturer, device trade name, keyword, floating subheading word, candidate term word]
8. 1 or 2 or 3 or 4 or 5 or 6 or 7
9. exp clinical trial/
10. randomi?ed.ti,ab.
11. placebo.ti,ab.
12. dt.fs.
13. randomly.ti,ab.
14. trial.ti,ab.
15. groups.ti,ab.
16. or/9-15
17. animal/
18. human/
19. 17 not (17 and 18)
20. 16 not 19
21. (tricyclic antidepressants or tricyclic anti-depressants or amitriptyline or amoxapine or Anafranil or Elavil or endep or clomipramine or c?lorimipramine or clomipramine hydrochloride or desipramine or norpramin or dibenzepin or dosulepin or dothiepin or doxepin or florpipramine or imipramine or iprindole or lofepramine or maprotiline or nortriptyline or opipramol or pertofrane or prothiaden or protriptyline or trimipramine or adapin or sinequan or tofranilor or feprapax or gamanilor or lomont or pamelor or vivactil or surmontilor or asendin).ti,ab.
22. exp \*tricyclic antidepressant agent/
23. exp \*Amitriptyline/ or exp \*Amoxapine/ or exp \*Clomipramine/ or exp \*Desipramine/ or exp \*Doxepin/ or exp \*Imipramine/ or exp \*Iprindole/ or exp \*Lofepramine/ or exp \*Protriptyline/ or exp \*Trimipramine/
24. 21 or 22 or 23
25. 8 and 20 and 24

## PRISMA Figures

Figure 1: PRISMA study flow: Acupuncture

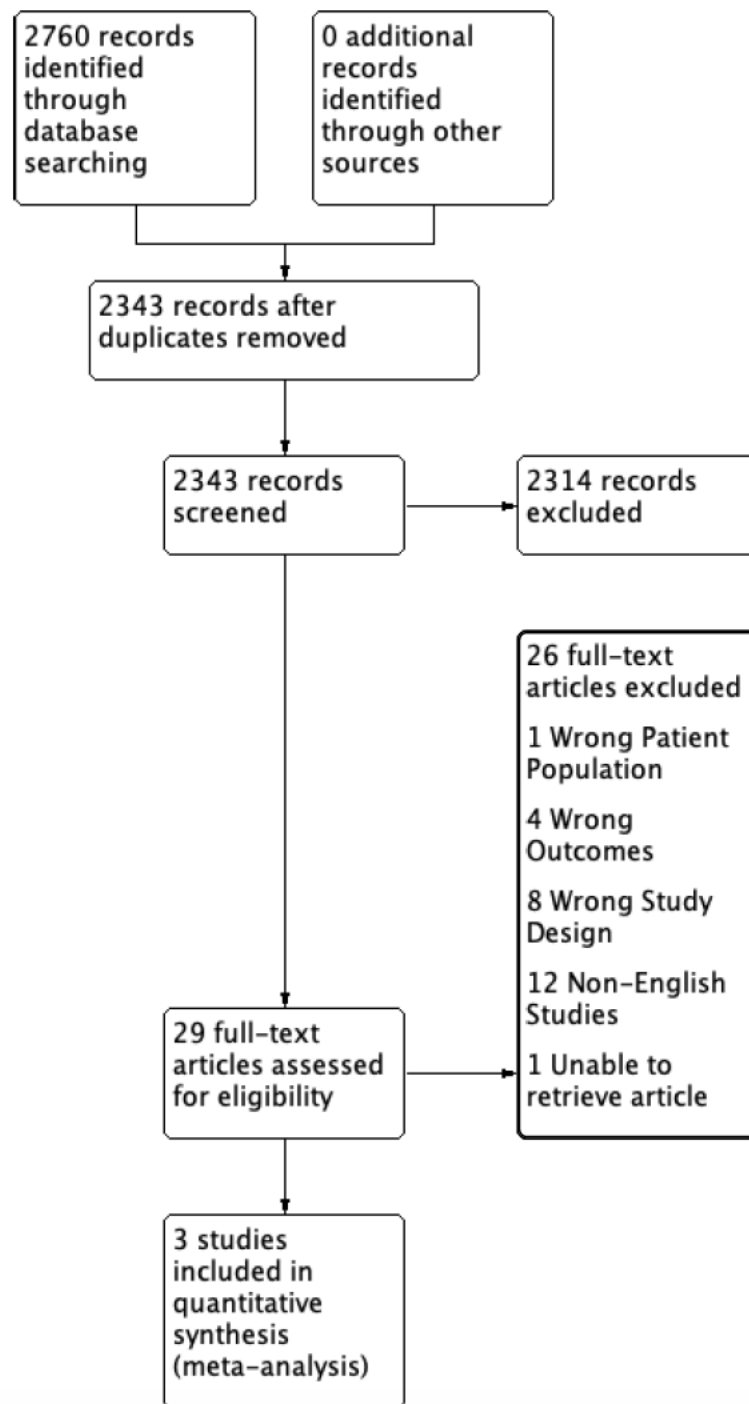



Figure 2: PRISMA study flow: Anticonvulsants

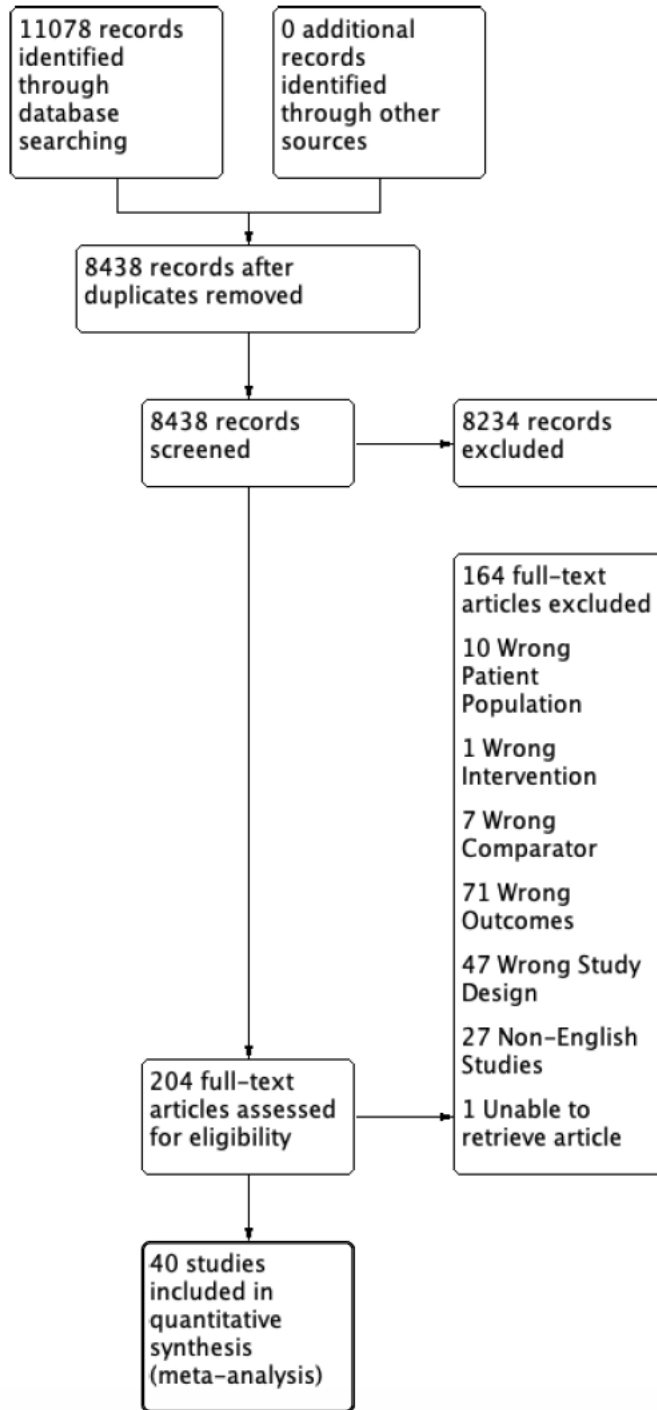

PRISMA: Preferred Reporting Items for Systematic Reviews and Meta-Analyses; RCT: randomized controlled trial

Figure 3: PRISMA study flow: Exercise

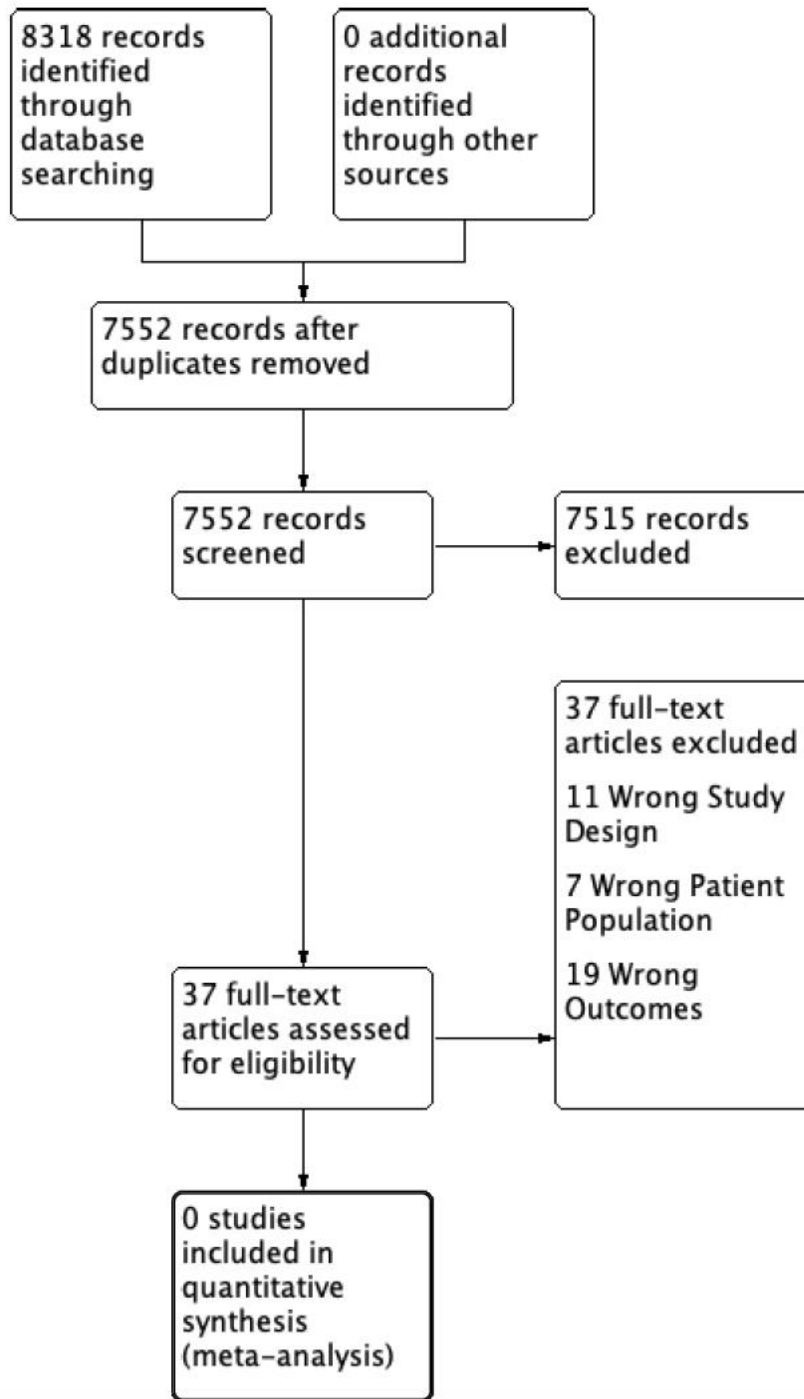

PRISMA: Preferred Reporting Items for Systematic Reviews and Meta-Analyses; RCT: randomized controlled trial

Figure 4: PRISMA study flow: Lidocaine

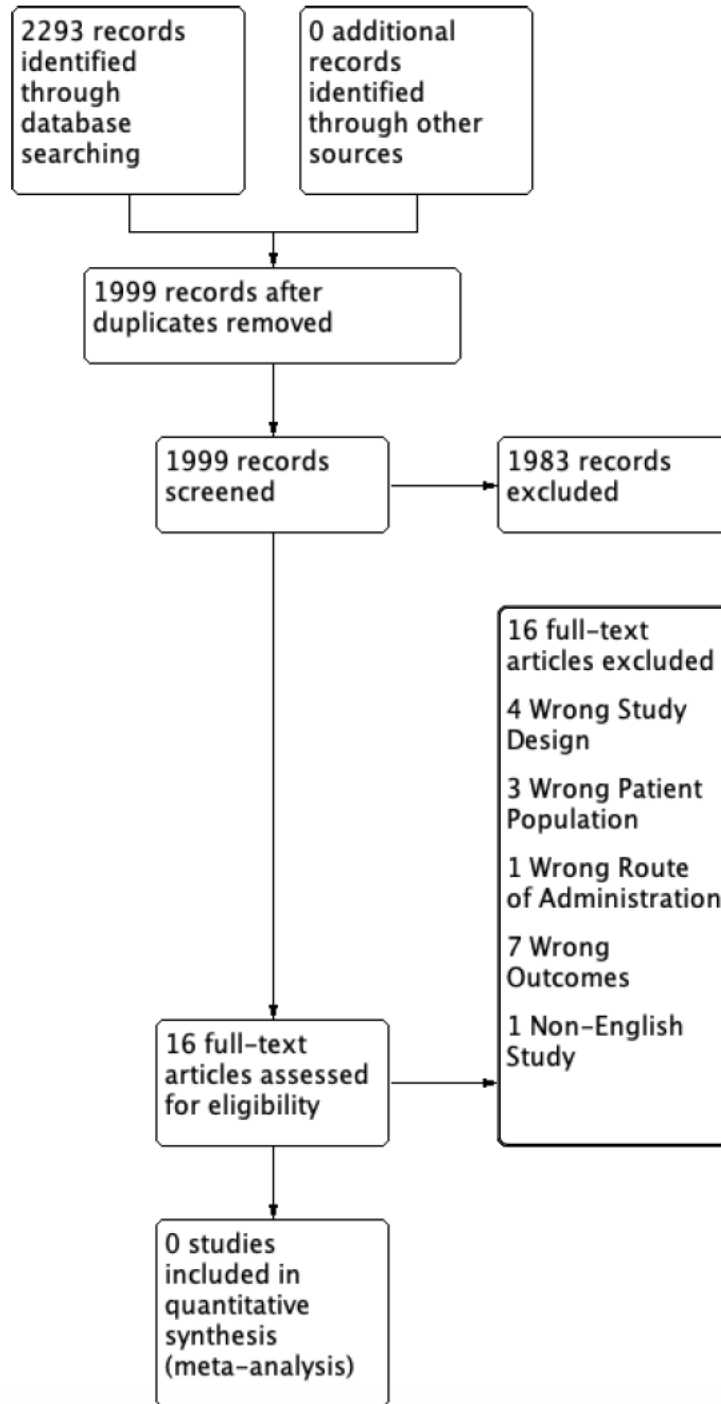

PRISMA: Preferred Reporting Items for Systematic Reviews and Meta-Analyses; RCT: randomized controlled trial

Figure 5: PRISMA study flow: Opioids

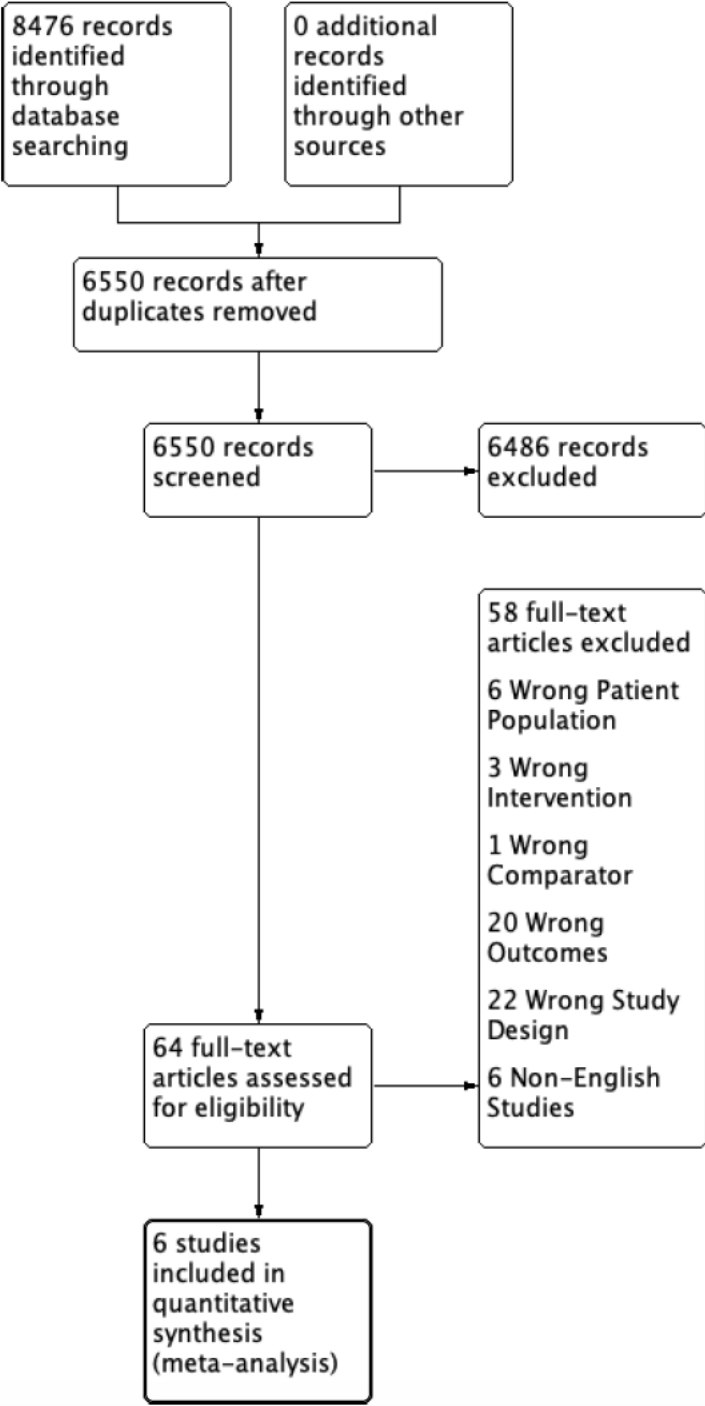

PRISMA: Preferred Reporting Items for Systematic Reviews and Meta-Analyses; RCT: randomized controlled trial

Figure 6: PRISMA study flow: Rubefacients

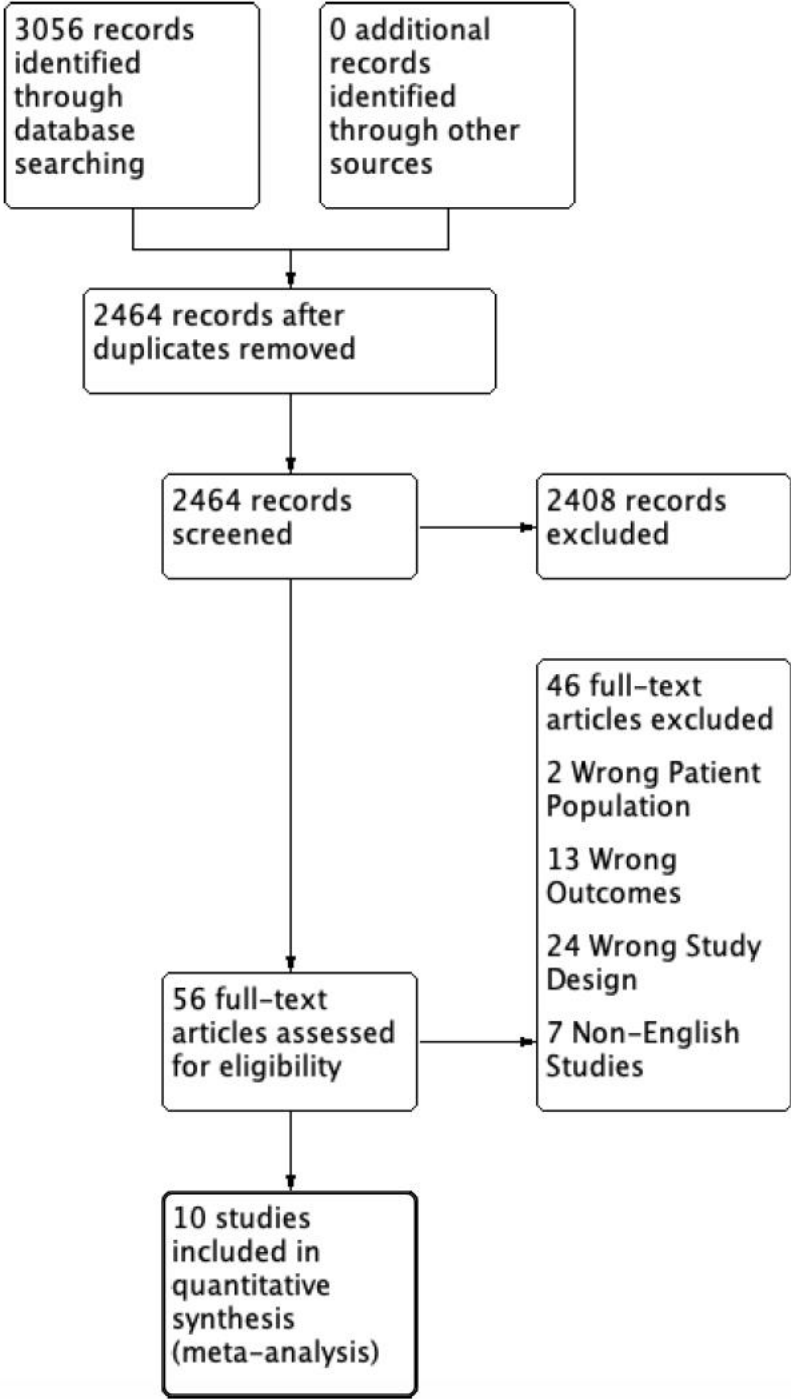

PRISMA: Preferred Reporting Items for Systematic Reviews and Meta-Analyses; RCT: randomized controlled trial

Figure 7: PRISMA study flow: SNRIs

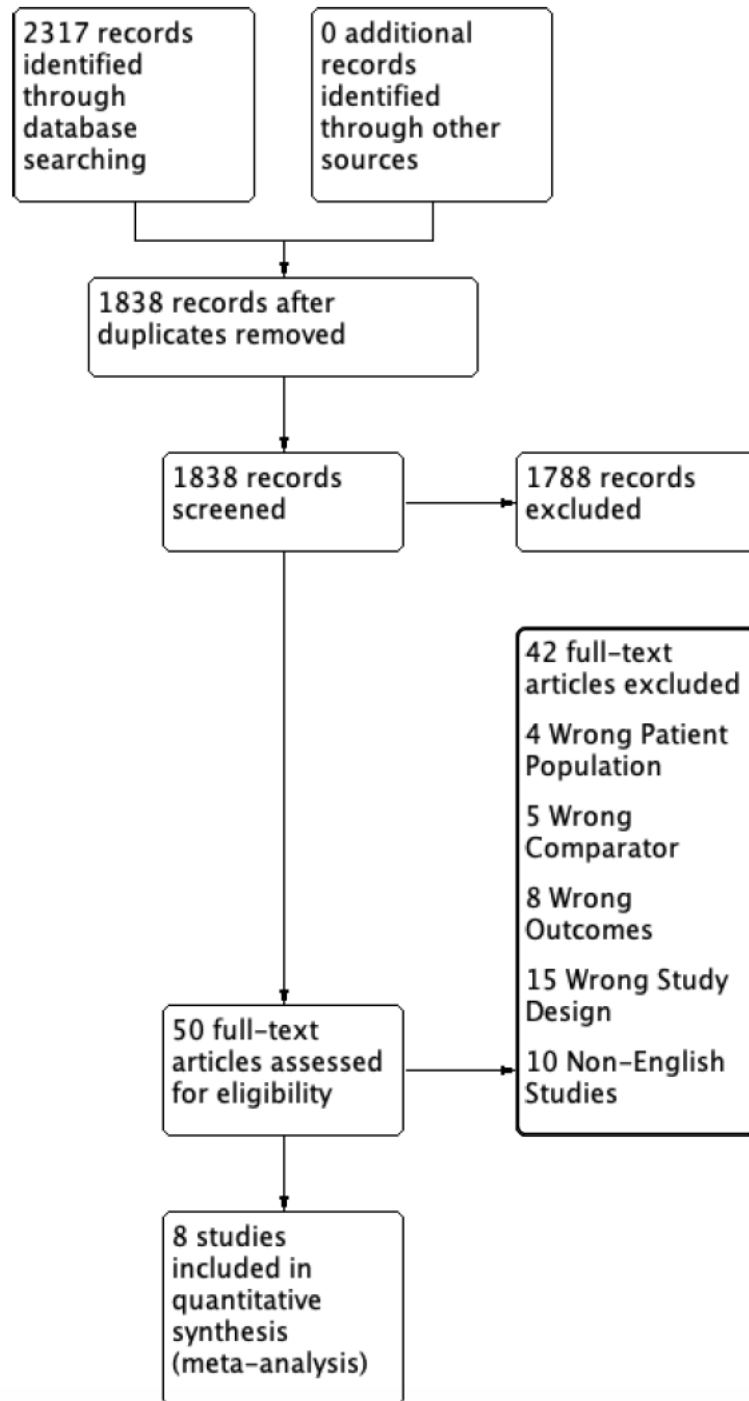

PRISMA: Preferred Reporting Items for Systematic Reviews and Meta-Analyses; RCT—randomized controlled trial; SNRIs—Serotonin Norepinephrine Reuptake Inhibitors

Figure 8: PRISMA study flow: TCAs

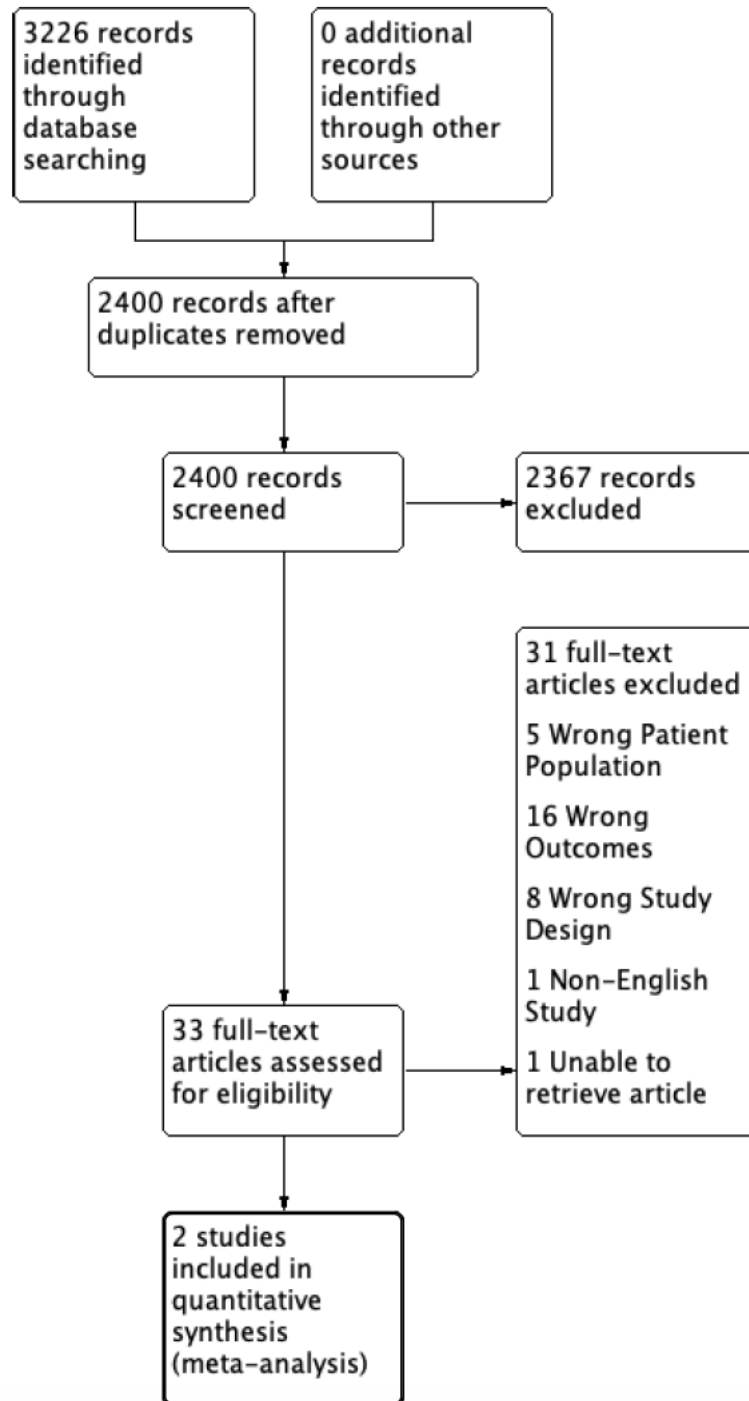

PRISMA: Preferred Reporting Items for Systematic Reviews and Meta-Analyses; RCT: randomized controlled trial; TCAs: Tricyclic Antidepressants
