# Supplementary material
Source: PubMed Central journal article supplement (PMC8115961)
Supplement: Neuropathic_Pain_Appendix_2.pdf [file Neuropathic_Pain_Appendix_2.pdf]

**PEER Systematic Review of Randomized Controlled Trials:  
Management of Chronic Neuropathic Pain in Primary Care  
Appendix 2**

Jamison Falk, Betsy Thomas, Jessica Kirkwood, Christina S. Korownyk, Adrienne J. Lindblad, Joey Ton, Samantha Moe, G. Michael Allan, James McCormack, Scott Garrison, Nicolas Dugré, Karenn Chan, Michael R. Kolber, Anthony Train, Liesbeth Froentjes, Logan Sept, Michael Wollin, Rodger Craig, Danielle Perry

## Table of Contents

|                                                                                                                                                                                      |           |
|--------------------------------------------------------------------------------------------------------------------------------------------------------------------------------------|-----------|
| <b>Table 1: Neuropathic Pain Outcomes Hierarchy</b>                                                                                                                                  | <b>9</b>  |
| <b>Table 2: Included Randomized Controlled Trials</b>                                                                                                                                | <b>11</b> |
| <b>Table 3: Overall proportion of patients with meaningful response at less than or equal to four weeks, four to twelve weeks and at greater than twelve weeks</b>                   | <b>18</b> |
| <b>Table 4: Overall proportion of patients with meaningful response at longest follow-up point after intervention (ordered by certainty of evidence)</b>                             | <b>20</b> |
| <b>Table 5: Proportion of patients with clinically meaningful response based on funding source (clearly publicly or industry funding)</b>                                            | <b>21</b> |
| <b>Table 6: Proportion of patients with clinically meaningful response based on median risk of bias scores</b>                                                                       | <b>22</b> |
| <b>Table 7: Proportion of patients with clinically meaningful response based on neuropathic pain type</b>                                                                            | <b>23</b> |
| <b>Table 8: Proportion of patients with clinically meaningful response based on drug type</b>                                                                                        | <b>25</b> |
| <b>Table 9: Proportion of patients with clinically meaningful response based on sample size</b>                                                                                      | <b>26</b> |
| <b>Table 10: Proportion of patients with clinically meaningful response based on sham or not-sham control group</b>                                                                  | <b>27</b> |
| <b>Data Analysis</b>                                                                                                                                                                 | <b>28</b> |
| <b>Acupuncture</b>                                                                                                                                                                   | <b>28</b> |
| Figure 1.1: Acupuncture versus control; Outcome: Proportion of patients with a meaningful response to treatment                                                                      | 28        |
| Figure 1.2: Acupuncture versus control; Outcome: Proportion of patients with a meaningful response to treatment at 4 weeks or less, 4 weeks to 12 weeks, and 12 weeks or greater     | 28        |
| Figure 1.3: Acupuncture versus control; Subgroup analysis: Proportion of patients with a meaningful response to treatment, analyzed by study funding source                          | 29        |
| Figure 1.4: Acupuncture versus control; Subgroup analysis: Proportion of patients with a meaningful response to treatment, analyzed by neuropathic pain type                         | 29        |
| Figure 1.5: Acupuncture versus control; Subgroup analysis: Proportion of patients with a meaningful response to treatment, analyzed by sample size                                   | 30        |
| Figure 1.6: Acupuncture versus control; Subgroup analysis: Proportion of patients with a meaningful response to treatment, analyzed by control group characteristics                 | 30        |
| <b>Anticonvulsants</b>                                                                                                                                                               | <b>31</b> |
| Figure 2.1: Anticonvulsants versus control; Subgroup analysis: Proportion of patients with a meaningful response to treatment, analyzed by drug type                                 | 31        |
| Figure 2.2: Anticonvulsants versus control; Outcome: Proportion of patients with a meaningful response to treatment at 4 weeks or less, 4 weeks to 12 weeks, and 12 weeks or greater | 32        |
| Figure 2.3: Anticonvulsants versus control; Subgroup analysis: Proportion of patients with a meaningful response to treatment, analyzed by study funding source                      | 33        |
| Figure 2.4: Anticonvulsants versus control; Subgroup analysis: Proportion of patients with a meaningful response to treatment, analyzed by median risk of bias                       | 34        |
| Figure 2.5: Anticonvulsants versus control; Subgroup analysis: Proportion of patients with a meaningful response to treatment, analyzed by neuropathic pain type                     | 36        |

|                                                                                                                                                                                    |           |
|------------------------------------------------------------------------------------------------------------------------------------------------------------------------------------|-----------|
| Figure 2.6: Anticonvulsants versus control; Subgroup analysis: Proportion of patients with a meaningful response to treatment, analyzed by sample size                             | 38        |
| <b>Anticonvulsants (Gabapentin)</b>                                                                                                                                                | <b>39</b> |
| Figure 3.1: Gabapentin versus control; Outcome: Proportion of patients with a meaningful response to treatment at 4 weeks or less, 4 weeks to 12 weeks, and 12 weeks or greater    | 39        |
| Figure 3.2: Gabapentin versus control; Subgroup analysis: Proportion of patients with a meaningful response to treatment, analyzed by study funding source                         | 40        |
| Figure 3.3: Gabapentin versus control; Subgroup analysis: Proportion of patients with a meaningful response to treatment, analyzed by neuropathic pain type                        | 41        |
| Figure 3.4: Gabapentin versus control; Subgroup analysis: Proportion of patients with a meaningful response to treatment, analyzed by sample size                                  | 42        |
| <b>Anticonvulsants (Oxcarbazepine)</b>                                                                                                                                             | <b>43</b> |
| Figure 4.1: Oxcarbazepine versus control; Outcome: Proportion of patients with a meaningful response to treatment at 4 weeks or less, 4 weeks to 12 weeks, and 12 weeks or greater | 43        |
| Figure 4.2: Oxcarbazepine versus control; Subgroup analysis: Proportion of patients with a meaningful response to treatment, analyzed by study funding source                      | 43        |
| Figure 4.3: Oxcarbazepine versus control; Subgroup analysis: Proportion of patients with a meaningful response to treatment, analyzed by neuropathic pain type                     | 44        |
| Figure 4.4: Oxcarbazepine versus control; Subgroup analysis: Proportion of patients with a meaningful response to treatment, analyzed by sample size                               | 44        |
| <b>Anticonvulsants (Pregabalin)</b>                                                                                                                                                | <b>45</b> |
| Figure 5.1: Pregabalin versus control; Outcome: Proportion of patients with a meaningful response to treatment at 4 weeks or less, 4 weeks to 12 weeks, and 12 weeks or greater    | 45        |
| Figure 5.2: Pregabalin versus control; Subgroup analysis: Proportion of patients with a meaningful response to treatment, analyzed by study funding source                         | 46        |
| Figure 5.3: Pregabalin versus control; Subgroup analysis: Proportion of patients with a meaningful response to treatment, analyzed by neuropathic pain type                        | 47        |
| Figure 5.4: Pregabalin versus control; Subgroup analysis: Proportion of patients with a meaningful response to treatment, analyzed by sample size                                  | 48        |
| <b>Anticonvulsants (Topiramate)</b>                                                                                                                                                | <b>49</b> |
| Figure 6.1: Topiramate versus control; Outcome: Proportion of patients with a meaningful response to treatment at 4 weeks or less, 4 weeks to 12 weeks, and 12 weeks or greater    | 49        |
| Figure 6.2: Topiramate versus control; Subgroup analysis: Proportion of patients with a meaningful response to treatment, analyzed by study funding source                         | 49        |
| Figure 6.3: Topiramate versus control; Subgroup analysis: Proportion of patients with a meaningful response to treatment, analyzed by neuropathic pain type                        | 50        |
| Figure 6.4: Topiramate versus control; Subgroup analysis: Proportion of patients with a meaningful response to treatment, analyzed by sample size                                  | 50        |
| <b>Opioids</b>                                                                                                                                                                     | <b>51</b> |
| Figure 7.1: Opioids versus control; Outcome: Proportion of patients with a meaningful response to treatment                                                                        | 51        |
| Figure 7.2: Opioids versus control; Outcome: Proportion of patients with a meaningful response to treatment at 4 weeks or less, 4 weeks to 12 weeks, and 12 weeks or greater       | 51        |
| Figure 7.3: Opioids versus control; Subgroup analysis: Proportion of patients with a meaningful response to treatment, analyzed by study funding source                            | 52        |
| Figure 7.4: Opioids versus control; Subgroup analysis: Proportion of patients with a meaningful response to treatment, analyzed by median risk of bias                             | 52        |
| Figure 7.5: Opioids versus control; Subgroup analysis: Proportion of patients with a meaningful response to treatment, analyzed by neuropathic pain type                           | 53        |

|                                                                                                                                                                                             |           |
|---------------------------------------------------------------------------------------------------------------------------------------------------------------------------------------------|-----------|
| Figure 7.6: Opioids versus control; Subgroup analysis: Proportion of patients with a meaningful response to treatment, analyzed by sample size                                              | 54        |
| <b>Rubefaciens (Capsaicin)</b>                                                                                                                                                              | <b>55</b> |
| Figure 8.1: Rubefaciens versus control; Outcome: Proportion of patients with a meaningful response to treatment                                                                             | 55        |
| Figure 8.2: Rubefaciens versus control; Outcome: Proportion of patients with a meaningful response to treatment at 4 weeks or less, 4 weeks to 12 weeks, and 12 weeks or greater            | 55        |
| Figure 8.3: Rubefaciens versus control; Subgroup analysis: Proportion of patients with a meaningful response to treatment, analyzed by study funding source                                 | 56        |
| Figure 8.4: Rubefaciens versus control; Subgroup analysis: Proportion of patients with a meaningful response to treatment, analyzed by median risk of bias                                  | 56        |
| Figure 8.5: Rubefaciens versus control; Subgroup analysis: Proportion of patients with a meaningful response to treatment, analyzed by neuropathic pain type                                | 57        |
| Figure 8.6: Rubefaciens versus control; Subgroup analysis: Proportion of patients with a meaningful response to treatment, analyzed by drug type                                            | 58        |
| Figure 8.7: Rubefaciens versus control; Subgroup analysis: Proportion of patients with a meaningful response to treatment, analyzed by sample size                                          | 58        |
| <b>SNRIs</b>                                                                                                                                                                                | <b>59</b> |
| Figure 9.1: SNRIs versus control; Outcome: Proportion of patients with a meaningful response to treatment.                                                                                  | 59        |
| Figure 9.2: SNRIs versus control; Outcome: Proportion of patients with a meaningful response to treatment at 4 weeks or less, 4 weeks to 12 weeks, and 12 weeks or greater                  | 60        |
| Figure 9.3: SNRIs versus control; Subgroup analysis: Proportion of patients with a meaningful response to treatment, analyzed by study funding source                                       | 61        |
| Figure 9.4: SNRIs versus control; Subgroup analysis: Proportion of patients with a meaningful response to treatment, analyzed by median risk of bias                                        | 62        |
| Figure 9.5: SNRIs versus control; Subgroup analysis: Proportion of patients with a meaningful response to treatment, analyzed by neuropathic pain type                                      | 63        |
| Figure 9.6: SNRIs versus control; Subgroup analysis: Proportion of patients with a meaningful response to treatment, analyzed by drug type                                                  | 64        |
| Figure 9.7: SNRIs versus control; Subgroup analysis: Proportion of patients with a meaningful response to treatment, analyzed by sample size                                                | 65        |
| <b>TCAs</b>                                                                                                                                                                                 | <b>66</b> |
| Figure 10.1: TCAs versus control; Outcome: Proportion of patients with a meaningful response to treatment (fixed effects)                                                                   | 66        |
| Figure 10.2: TCAs versus control; Outcome: Proportion of patients with a meaningful response to treatment (random effects)                                                                  | 66        |
| Figure 10.3: TCAs versus control; Outcome: Proportion of patients with a meaningful response to treatment at 4 weeks or less, 4 weeks to 12 weeks, and 12 weeks or greater (fixed effects)  | 67        |
| Figure 10.4: TCAs versus control; Outcome: Proportion of patients with a meaningful response to treatment at 4 weeks or less, 4 weeks to 12 weeks, and 12 weeks or greater (random effects) | 67        |
| Figure 10.5: TCAs versus control; Subgroup analysis: Proportion of patients with a meaningful response to treatment, analyzed by neuropathic pain type (fixed effects)                      | 68        |
| Figure 10.6: TCAs versus control; Subgroup analysis: Proportion of patients with a meaningful response to treatment, analyzed by neuropathic pain type (random effects)                     | 68        |
| Figure 10.7: TCAs versus control; Subgroup analysis: Proportion of patients with a meaningful response to treatment, analyzed by sample size (fixed effects)                                | 69        |
| Figure 10.8: TCAs versus control; Subgroup analysis: Proportion of patients with a meaningful response to treatment, analyzed by sample size (random effects)                               | 69        |
| <b>Adverse Events</b>                                                                                                                                                                       | <b>70</b> |

|                                                                                                                                    |            |
|------------------------------------------------------------------------------------------------------------------------------------|------------|
| <b>Table 11: Individual Adverse Events (reported by single RCTs)</b>                                                               | <b>70</b>  |
| <b>Table 12: Individual Meta-Analyzed Adverse Events</b>                                                                           | <b>118</b> |
| <b>Table 13: Statistically Significant Meta-Analyzed Adverse Events Occurring in &gt;10% of Patients Treated with Intervention</b> | <b>133</b> |
| <b>Table 14: Withdrawals Due to Adverse Events</b>                                                                                 | <b>137</b> |
| <b>Data Analysis of Adverse Events</b>                                                                                             | <b>138</b> |
| <b>Acupuncture</b>                                                                                                                 | <b>138</b> |
| Figure 11.1 Acupuncture versus control; Withdrawals due to Adverse Events                                                          | 138        |
| <b>Anticonvulsants (Gabapentin)</b>                                                                                                | <b>139</b> |
| Figure 12.1 Gabapentin versus control; Withdrawals due to Adverse Events                                                           | 139        |
| Figure 12.2 Gabapentin versus control; Adverse Event: Arthralgia                                                                   | 139        |
| Figure 12.3 Gabapentin versus control; Adverse Event: Back Pain                                                                    | 139        |
| Figure 12.4 Gabapentin versus control; Adverse Event: Blurred Vision                                                               | 140        |
| Figure 12.5 Gabapentin versus control; Adverse Event: Constipation                                                                 | 140        |
| Figure 12.6 Gabapentin versus control; Adverse Event: Diarrhea                                                                     | 140        |
| Figure 12.7 Gabapentin versus control; Adverse Event: Dizziness                                                                    | 141        |
| Figure 12.8 Gabapentin versus control; Adverse Event: Dry Mouth                                                                    | 141        |
| Figure 12.9 Gabapentin versus control; Adverse Event: Headache                                                                     | 141        |
| Figure 12.10 Gabapentin versus control; Adverse Event: Increased Weight                                                            | 142        |
| Figure 12.11 Gabapentin versus control; Adverse Event: Insomnia                                                                    | 142        |
| Figure 12.12 Gabapentin versus control; Adverse Event: Nasopharyngitis                                                             | 142        |
| Figure 12.13 Gabapentin versus control; Adverse Event: Nausea                                                                      | 142        |
| Figure 12.14 Gabapentin versus control; Adverse Event: Peripheral Edema                                                            | 143        |
| Figure 12.15 Gabapentin versus control; Adverse Event: Serious Adverse Events                                                      | 143        |
| Figure 12.16 Gabapentin versus control; Adverse Event: Somnolence and Fatigue                                                      | 143        |
| Figure 12.17 Gabapentin versus control; Adverse Event: Urinary Tract Infection                                                     | 144        |
| <b>Anticonvulsants (Oxcarbazepine)</b>                                                                                             | <b>145</b> |
| Figure 13.1 Oxcarbazepine versus control; Withdrawals due to Adverse Events                                                        | 145        |
| Figure 13.2 Oxcarbazepine versus control; Adverse Event: Back Pain                                                                 | 145        |
| Figure 13.3 Oxcarbazepine versus control; Adverse Event: Diarrhea                                                                  | 145        |
| Figure 13.4 Oxcarbazepine versus control; Adverse Event: Dizziness                                                                 | 145        |
| Figure 13.5 Oxcarbazepine versus control; Adverse Event: Headache                                                                  | 145        |
| Figure 13.6 Oxcarbazepine versus control; Adverse Event: Nausea                                                                    | 146        |
| Figure 13.7 Oxcarbazepine versus control; Adverse Event: Serious Adverse Events                                                    | 146        |
| Figure 13.8 Oxcarbazepine versus control; Adverse Event: Somnolence and Fatigue                                                    | 146        |
| Figure 13.9 Oxcarbazepine versus control; Adverse Event: Tremor                                                                    | 146        |
| <b>Anticonvulsants (Pregabalin)</b>                                                                                                | <b>147</b> |
| Figure 14.1 Pregabalin versus control; Withdrawals due to Adverse Events                                                           | 147        |
| Figure 14.2 Pregabalin versus control; Adverse Event: Abnormal Coordination                                                        | 147        |
| Figure 14.3 Pregabalin versus control; Adverse Event: Abnormal Thinking                                                            | 148        |
| Figure 14.4 Pregabalin versus control; Adverse Event: Amblyopia                                                                    | 148        |
| Figure 14.5 Pregabalin versus control; Adverse Event: Amnesia                                                                      | 148        |
| Figure 14.6 Pregabalin versus control; Adverse Event: Asthenia                                                                     | 149        |
| Figure 14.7 Pregabalin versus control; Adverse Event: Ataxia                                                                       | 149        |
| Figure 14.8 Pregabalin versus control; Adverse Event: Back Pain                                                                    | 149        |
| Figure 14.9 Pregabalin versus control; Adverse Event: Balance Disorder                                                             | 150        |
| Figure 14.10 Pregabalin versus control; Adverse Event: Confusion                                                                   | 150        |
| Figure 14.11 Pregabalin versus control; Adverse Event: Constipation                                                                | 150        |

|                                                                                          |            |
|------------------------------------------------------------------------------------------|------------|
| Figure 14.12 Pregabalin versus control; Adverse Event: Contusion                         | 151        |
| Figure 14.13 Pregabalin versus control; Adverse Event: Diarrhea                          | 151        |
| Figure 14.14 Pregabalin versus control; Adverse Event: Diplopia                          | 151        |
| Figure 14.15 Pregabalin versus control; Adverse Event: Disturbance in Attention          | 152        |
| Figure 14.16 Pregabalin versus control; Adverse Event: Dizziness                         | 152        |
| Figure 14.17 Pregabalin versus control; Adverse Event: Dry Mouth                         | 153        |
| Figure 14.18 Pregabalin versus control; Adverse Event: Euphoria                          | 153        |
| Figure 14.19 Pregabalin versus control; Adverse Event: Facial Edema                      | 153        |
| Figure 14.20 Pregabalin versus control; Adverse Event: Falls                             | 154        |
| Figure 14.21 Pregabalin versus control; Adverse Event: Flatulence                        | 154        |
| Figure 14.22 Pregabalin versus control; Adverse Event: Generalized Edema                 | 154        |
| Figure 14.23 Pregabalin versus control; Adverse Event: Headache                          | 155        |
| Figure 14.24 Pregabalin versus control; Adverse Event: Hyperglycemia                     | 155        |
| Figure 14.25 Pregabalin versus control; Adverse Event: Increased Appetite                | 155        |
| Figure 14.26 Pregabalin versus control; Adverse Event: Increased Pain                    | 156        |
| Figure 14.27 Pregabalin versus control; Adverse Event: Increased Sweating                | 156        |
| Figure 14.28 Pregabalin versus control; Adverse Event: Infection                         | 156        |
| Figure 14.29 Pregabalin versus control; Adverse Event: Injury                            | 156        |
| Figure 14.30 Pregabalin versus control; Adverse Event: Lethargy                          | 157        |
| Figure 14.31 Pregabalin versus control; Adverse Event: Muscle Spasm                      | 157        |
| Figure 14.32 Pregabalin versus control; Adverse Event: Nasopharyngitis                   | 157        |
| Figure 14.33 Pregabalin versus control; Adverse Event: Nausea                            | 157        |
| Figure 14.34 Pregabalin versus control; Adverse Event: Peripheral Edema                  | 158        |
| Figure 14.35 Pregabalin versus control; Adverse Event: Serious Adverse Events            | 158        |
| Figure 14.36 Pregabalin versus control; Adverse Event: Somnolence and Fatigue            | 159        |
| Figure 14.37 Pregabalin versus control; Adverse Event: Upper Respiratory Tract Infection | 159        |
| Figure 14.38 Pregabalin versus control; Adverse Event: Urinary Tract Infection           | 160        |
| Figure 14.39 Pregabalin versus control; Adverse Event: Vertigo                           | 160        |
| Figure 14.40 Pregabalin versus control; Adverse Event: Vision Problems                   | 160        |
| Figure 14.41 Pregabalin versus control; Adverse Event: Vomiting                          | 160        |
| Figure 14.42 Pregabalin versus control; Adverse Event: Weight Gain                       | 161        |
| <b>Anticonvulsants (Topiramate)</b>                                                      | <b>162</b> |
| Figure 15.1 Topiramate versus control; Withdrawals due to Adverse Events                 | 162        |
| <b>Opioids</b>                                                                           | <b>163</b> |
| Figure 16.1 Opioids versus control; Withdrawals due to Adverse Events                    | 163        |
| Figure 16.2 Opioids versus control; Adverse Event: Asthenia                              | 163        |
| Figure 16.3 Opioids versus control; Adverse Event: Constipation                          | 163        |
| Figure 16.4 Opioids versus control; Adverse Event: Diarrhea                              | 163        |
| Figure 16.5 Opioids versus control; Adverse Event: Dizziness                             | 164        |
| Figure 16.6 Opioids versus control; Adverse Event: Dry Mouth                             | 164        |
| Figure 16.7 Opioids versus control; Adverse Event: Generalized Pain                      | 164        |
| Figure 16.8 Opioids versus control; Adverse Event: Headache                              | 164        |
| Figure 16.9 Opioids versus control; Adverse Event: Nausea                                | 165        |
| Figure 16.10 Opioids versus control; Adverse Event: Pruritus                             | 165        |
| Figure 16.11 Opioids versus control; Adverse Event: Serious Adverse Events               | 165        |
| Figure 16.12 Opioids versus control; Adverse Event: Somnolence and Fatigue               | 165        |
| Figure 16.13 Opioids versus control; Adverse Event: Upper Respiratory Tract Infection    | 166        |
| Figure 16.14 Opioids versus control; Adverse Event: Vomiting                             | 166        |
| <b>Rubefacients (Capsaicin)</b>                                                          | <b>167</b> |
| Figure 17.1 Rubefacients versus control; Withdrawals due to Adverse Events               | 167        |
| Figure 17.2 Rubefacients versus control; Adverse Event: Back Pain                        | 167        |

|                                                                                                             |            |
|-------------------------------------------------------------------------------------------------------------|------------|
| Figure 17.3 Rubefacients versus control; Adverse Event: Coughing and/or Sneezing                            | 167        |
| Figure 17.4 Rubefacients versus control; Adverse Event: Dizziness                                           | 167        |
| Figure 17.5 Rubefacients versus control; Adverse Event: Headache                                            | 168        |
| Figure 17.6 Rubefacients versus control; Adverse Event: Increased Blood Pressure                            | 168        |
| Figure 17.7 Rubefacients versus control; Adverse Event: Local Reaction (Burning, Stinging, and/or Erythema) | 168        |
| Figure 17.8 Rubefacients versus control; Adverse Event: Nasopharyngitis                                     | 168        |
| Figure 17.9 Rubefacients versus control; Adverse Event: Nausea                                              | 169        |
| Figure 17.10 Rubefacients versus control; Adverse Event: Pain at Application Site                           | 169        |
| Figure 17.11 Rubefacients versus control; Adverse Event: Papules at Application Site                        | 169        |
| Figure 17.12 Rubefacients versus control; Adverse Event: Pruritus at Application Site                       | 169        |
| Figure 17.13 Rubefacients versus control; Adverse Event: Serious Adverse Events                             | 170        |
| Figure 17.14 Rubefacients versus control; Adverse Event: Sinusitis                                          | 170        |
| Figure 17.15 Rubefacients versus control; Adverse Event: Swelling at Application Site                       | 170        |
| Figure 17.16 Rubefacients versus control; Adverse Event: Unspecific Application Site Reaction               | 170        |
| Figure 17.17 Rubefacients versus control; Adverse Event: Upper Respiratory Tract Infection                  | 170        |
| Figure 17.18 Rubefacients versus control; Adverse Event: Vomiting                                           | 171        |
| <b>SNRIs</b>                                                                                                | <b>172</b> |
| Figure 18.1 SNRIs versus control; Withdrawals due to Adverse Events                                         | 172        |
| Figure 18.2 SNRIs versus control; Adverse Event: Anorexia                                                   | 172        |
| Figure 18.3 SNRIs versus control; Adverse Event: Asthenia                                                   | 172        |
| Figure 18.4 SNRIs versus control; Adverse Event: Constipation                                               | 173        |
| Figure 18.5 SNRIs versus control; Adverse Event: Decreased Appetite                                         | 173        |
| Figure 18.6 SNRIs versus control; Adverse Event: Diarrhea                                                   | 173        |
| Figure 18.7 SNRIs versus control; Adverse Event: Dizziness                                                  | 174        |
| Figure 18.8 SNRIs versus control; Adverse Event: Dry Mouth                                                  | 174        |
| Figure 18.9 SNRIs versus control; Adverse Event: Fatigue                                                    | 174        |
| Figure 18.10 SNRIs versus control; Adverse Event: Headache                                                  | 175        |
| Figure 18.11 SNRIs versus control; Adverse Event: Increased Sweating                                        | 175        |
| Figure 18.12 SNRIs versus control; Adverse Event: Insomnia                                                  | 175        |
| Figure 18.13 SNRIs versus control; Adverse Event: Lethargy                                                  | 175        |
| Figure 18.14 SNRIs versus control; Adverse Event: Nasopharyngitis                                           | 176        |
| Figure 18.15 SNRIs versus control; Adverse Event: Nausea                                                    | 176        |
| Figure 18.16 SNRIs versus control; Adverse Event: Serious Adverse Events                                    | 177        |
| Figure 18.17 SNRIs versus control; Adverse Event: Somnolence and Fatigue                                    | 177        |
| Figure 18.18 SNRIs versus control; Adverse Event: Sustained Hypertension                                    | 177        |
| Figure 18.19 SNRIs versus control; Adverse Event: Vomiting                                                  | 178        |
| <b>Funnel Plots</b>                                                                                         | <b>179</b> |
| Figure 19.1 Anticonvulsants                                                                                 | 179        |
| Figure 19.2 Rubefacients                                                                                    | 179        |
| Figure 19.3 SNRIs                                                                                           | 180        |
| <b>Quality Assessment</b>                                                                                   | <b>181</b> |
| <b>Cochrane Risk of Bias Tables</b>                                                                         | <b>181</b> |
| Figure 20.1a Acupuncture Risk of Bias Summary                                                               | 181        |
| Figure 20.1b Acupuncture Risk of Bias Graph                                                                 | 182        |
| Figure 20.2a Anticonvulsants Risk of Bias Summary                                                           | 182        |
| Figure 20.2b Anticonvulsants Risk of Bias Graph                                                             | 183        |
| Figure 20.3a Opioids Risk of Bias Summary                                                                   | 184        |

|                                                       |            |
|-------------------------------------------------------|------------|
| Figure 20.3b Opioids Risk of Bias Graph               | 184        |
| Figure 20.4a Rubefaciants Risk of Bias Summary        | 185        |
| Figure 20.4b Rubefaciants Risk of Bias Graph          | 185        |
| Figure 20.5a SNRIs Risk of Bias Summary               | 186        |
| Figure 20.5b SNRIs Risk of Bias Graph                 | 186        |
| Figure 20.6a TCAs Risk of Bias Summary                | 187        |
| Figure 20.6b TCAs Risk of Bias Graph                  | 187        |
| <b>Table 15: GRADE Evaluation of Evidence Quality</b> | <b>188</b> |
| <b>GRADE Criteria for Quality Assessment Sections</b> | <b>188</b> |
| <b>Peer Review Comments/Feedback</b>                  | <b>189</b> |
| <b>References</b>                                     | <b>196</b> |



**Table 1: Neuropathic Pain Outcomes Hierarchy**

- This hierarchy outlines the priority of outcomes used for overall meta-analyses presented in the systematic review.
  - **When there are studies that report a scale change on:** Pain only or pain and function, we would prefer to use assessments on pain only. We are not including assessments or responder analyses that only focus on function.
    - **Rationale:** As clinicians we understand function is crucial however, we also know that pain is the presenting issue for patients. Therefore, we wanted to develop information around pain to allow for shared decision-making with our patients.
1. Percent improvement on a pain scale that is closest to 30% improvement
    - a. If there is a tie, e.g., 25% and 35% improvement, we would use the higher number.
  2. Clinically meaningful change on any low back pain scale
    - a. This includes achieving a particular back pain scale score that reaches a certain threshold on the low back pain scale at the study endpoint.
  3. Change of **at least** 1 on a VAS / NRS scale (out of 11 or 10); Or change of  $\geq 10$  on a VAS/NRS (out of scale 100).
    - a. If multiple outcomes included are reported, order of preference is:
      - i.  $\geq 2$  change on VAS/NRS out of 10-11 or change of  $\geq 20$  on VAS/NRS out of 100.
      - ii.  $\geq 3$  change on VAS/NRS out of 10-11 or change of  $\geq 30$  on VAS/NRS out of 100.
      - iii.  $\geq 1$  change on VAS / NRS out of 10-11 or change of  $\geq 10$  on VAS / NRS out of 100.

**Note:** Change of at least 2 is preferred because if an average baseline pain of 5-6 is seen, a change of 2 would be closest to a 30% improvement in change.
  4. Reaching a score of  $\leq 4$  on VAS / NRS scale (out of 11 or 10); Or score of  $\leq 40$  on a VAS/NRS (out of scale 100).
    - a. If multiple is present, order of preference is:
      - i. Reaching a score of  $\leq 4$  on VAS / NRS scale (out of 11 or 10); Or score of  $\leq 40$  on a VAS/NRS (out of scale 100).
      - ii. Reaching a score of  $\leq 3$  on VAS / NRS scale (out of 11 or 10); Or score of  $\leq 30$  on a VAS/NRS (out of scale 100).
      - iii. Reaching a score of  $\leq 2$  on VAS / NRS scale (out of 11 or 10); Or score of  $\leq 20$  on a VAS/NRS (out of scale 100).
      - iv. Reaching a score of  $\leq 1$  on VAS / NRS scale (out of 11 or 10); Or score of  $\leq 10$  on a VAS/NRS (out of scale 100).

**Note:** Reaching a score of  $< 4/10$  is preferred because if an average baseline pain of 5-6/10 is seen, obtaining a score of 4 or less would be closest to a 30% improvement in change.
  5. Change in a scale that are out of a score not mentioned above (example out of 20). (We will have to adjust so it comes close to that 30% improvement.)

6. Patient Global Assessment of Change / Improvement (e.g., None/Slight/Moderate/Very Good/Excellent (or similar language).
  - a. If multiple outcomes involving the assessment is available or calculatable, preference is:
    - i. Patients achieving at least a **moderate/good** (or similar wording) or greater change.
    - ii. Patients achieving at least a **very good** (or similar wording) or greater change.
    - iii. Patients achieving at least an **excellent** (or similar wording) or greater change.
  - b. Notes:
    - i. **We are not including caregiver or clinician assessment of change.**
    - ii. If there is an undefined % improved as determined by **patient**, we would include.
    - iii. There may be times when authors need to combine raw event numbers to obtain the above pre-specified outcomes, this would occur following data extraction step.

**Table 2: Included Randomized Controlled Trials**

| Intervention Type | Author, Year  | Sample Size | Duration of Neuropathic Pain (weeks)/Type of Neuropathic Pain | Mean Age | Outcome Measured At | Intervention(s)                                                                                                     | Outcome used in Meta-Analysis               |
|-------------------|---------------|-------------|---------------------------------------------------------------|----------|---------------------|---------------------------------------------------------------------------------------------------------------------|---------------------------------------------|
| Acupuncture       | Garrow 2014   | 59          | Not Reported/<br>Diabetic Neuropathy                          | 65       | 10 weeks            | Standardized Acupuncture; 10 weekly sessions<br>Sham Acupuncture; 10 weekly sessions                                | ≥25% Improvement in Pain                    |
| Acupuncture       | Lewith 1983   | 62          | 65 weeks/<br>Postherpetic Neuralgia                           | 72       | 8 weeks             | Auricular Acupuncture; maximum 8 weekly sessions<br>Sham TENS machine; maximum 8 weekly sessions                    | 2-point Improvement on a 7-point Pain Scale |
| Acupuncture       | Shin 2018     | 126         | 183 weeks/<br>Diabetic Neuropathy                             | NR       | 9 weeks             | Electroacupuncture; twice weekly sessions over 8 weeks + Diet/Lifestyle Brochure<br>Diet/Lifestyle Brochure         | ≥50% Reduction in Pain                      |
| Anticonvulsants   | Achar 2010    | 30          | Not reported/<br>Postherpetic Neuralgia                       | NR       | 8 weeks             | Pregabalin 75 mg twice daily + Amitriptyline 25 mg daily<br>Amitriptyline 25 mg daily                               | ≥75% Improvement in Pain                    |
| Anticonvulsants   | Arezzo 2008   | 167         | 242 weeks/<br>Diabetic Neuropathy                             | 58       | 13 weeks            | Pregabalin 300 mg twice daily<br>Placebo                                                                            | ≥50% Reduction in Pain                      |
| Anticonvulsants   | Baba 2020     | 450         | 144 weeks/<br>Diabetic Neuropathy                             | 60       | 7 weeks             | Pregabalin 150 mg twice daily<br>Placebo                                                                            | ≥30% Reduction in Pain                      |
| Anticonvulsants   | Backonja 1998 | 165         | Not Reported/<br>Diabetic Neuropathy                          | 53       | 8 weeks             | Gabapentin 3600 mg daily (max)<br>Placebo                                                                           | PGIC “Much” or “Moderate” Improvement       |
| Anticonvulsants   | Backonja 2011 | 101         | 170 weeks/<br>Postherpetic Neuralgia                          | 64       | 2 weeks             | Gabapentin 624 mg daily<br>Placebo                                                                                  | 30% Improvement in Pain                     |
| Anticonvulsants   | Beydoun 2006  | 347         | 144 weeks/<br>Diabetic Neuropathy                             | 61       | 16 weeks            | Oxcarbazepine 300 mg twice daily<br>Oxcarbazepine 600 mg twice daily<br>Oxcarbazepine 900 mg twice daily<br>Placebo | PGIC “Much” or “Very Much” Improved         |

|                 |                    |     |                                                                                              |    |          |                                                                                                                                 |                                           |
|-----------------|--------------------|-----|----------------------------------------------------------------------------------------------|----|----------|---------------------------------------------------------------------------------------------------------------------------------|-------------------------------------------|
| Anticonvulsants | CTRI476G230<br>1   | 141 | 151 weeks/<br>Diabetic<br>Neuropathy                                                         | 61 | 16 weeks | Oxcarbazepine 1200 mg daily<br>Placebo                                                                                          | PGIC "Much" or<br>"Very Much"<br>Improved |
| Anticonvulsants | Dogra 2005         | 146 | 138 weeks/<br>Diabetic<br>Neuropathy                                                         | 60 | 16 weeks | Oxcarbazepine 900 mg twice daily<br>Placebo                                                                                     | ≥30% Reduction in<br>Pain                 |
| Anticonvulsants | Dworkin<br>2003    | 173 | 135 weeks/<br>Postherpetic<br>Neuralgia                                                      | 72 | 8 weeks  | Pregabalin 100-200 mg thrice daily<br>Placebo                                                                                   | ≥30% Reduction in<br>Pain                 |
| Anticonvulsants | Guan 2011          | 308 | 149 weeks/<br>Diabetic<br>Neuropathy                                                         | 60 | 8 weeks  | Pregabalin 150-600 mg daily<br>Placebo                                                                                          | ≥30% Reduction in<br>Pain                 |
| Anticonvulsants | Freynhagen<br>2005 | 338 | 149 weeks (PHN),<br>244 weeks (DN)/<br>Postherpetic<br>Neuralgia +<br>Diabetic<br>Neuropathy | 62 | 12 weeks | Pregabalin Flexible Dose 75-300 mg<br>twice daily (mean 372 mg daily)<br>Pregabalin Fixed Dose 300 mg twice<br>daily<br>Placebo | ≥30% Reduction in<br>Pain                 |
| Anticonvulsants | Huffman<br>2015    | 203 | 247 weeks/<br>Diabetic<br>Neuropathy                                                         | 59 | 6 weeks  | Pregabalin 150-300 mg thrice daily<br>Placebo                                                                                   | ≥30% Reduction in<br>Pain                 |
| Anticonvulsants | Lesser 2004        | 337 | Not Reported/<br>Diabetic<br>Neuropathy                                                      | 60 | 5 weeks  | Pregabalin 25 mg thrice daily<br>Pregabalin 100 mg thrice daily<br>Pregabalin 300 mg thrice daily<br>Placebo                    | ≥30% Reduction in<br>Pain                 |
| Anticonvulsants | Liu 2017           | 220 | 18 weeks/<br>Postherpetic<br>Neuralgia                                                       | 65 | 8 weeks  | Pregabalin 300 mg daily<br>Placebo                                                                                              | ≥30% Reduction in<br>Pain                 |
| Anticonvulsants | McDonnell<br>2018  | 91  | 387 weeks/<br>Diabetic<br>Neuropathy                                                         | 59 | 4 weeks  | Pregabalin 150 mg twice daily<br>Placebo                                                                                        | ≥30% Reduction in<br>Pain                 |
| Anticonvulsants | Moon 2010          | 240 | 111 weeks/<br>Postherpetic<br>Neuralgia<br>(primarily)                                       | 60 | 8 weeks  | Pregabalin 600 mg daily<br>Placebo                                                                                              | ≥30% Reduction in<br>Pain                 |

|                 |                      |     |                                            |    |          |                                                                                                                        |                                            |
|-----------------|----------------------|-----|--------------------------------------------|----|----------|------------------------------------------------------------------------------------------------------------------------|--------------------------------------------|
| Anticonvulsants | Mu 2018              | 620 | 120 weeks/<br>Diabetic<br>Neuropathy       | 61 | 11 weeks | Pregabalin 300 mg daily<br>Placebo                                                                                     | ≥30% Reduction in<br>Pain                  |
| Anticonvulsants | NCT0221525<br>2 2014 | 91  | Not Reported/<br>Diabetic<br>Neuropathy    | 59 | 4 weeks  | Pregabalin 300 mg daily<br>Placebo                                                                                     | ≥30% Reduction in<br>Pain                  |
| Anticonvulsants | NCT0039490<br>1 2006 | 372 | Not Reported/<br>Diabetic<br>Neuropathy    | 70 | 13 weeks | Pregabalin 150 mg daily<br>Pregabalin 300 mg daily<br>Pregabalin 600 mg daily<br>Placebo                               | ≥50% Reduction in<br>Pain                  |
| Anticonvulsants | Perez 2000           | 32  | Not Reported/<br>Diabetic<br>Neuropathy    | 54 | 12 weeks | Gabapentin 1200 mg daily (max)<br>Placebo                                                                              | Pain Relief                                |
| Anticonvulsants | Raskin 2004          | 323 | 166<br>weeks/Diabetic<br>Neuropathy        | 59 | 12 weeks | Topiramate 400 mg daily<br>Placebo                                                                                     | ≥30% Reduction in<br>Pain                  |
| Anticonvulsants | Rauck 2012           | 420 | Not Reported/<br>Diabetic<br>Neuropathy    | 59 | 13 weeks | Gabapentin 1200 mg daily<br>Gabapentin 2400 mg daily<br>Gabapentin 3600 mg daily<br>Pregabalin 300 mg daily<br>Placebo | ≥30% Reduction in<br>Pain                  |
| Anticonvulsants | Rice 2001            | 334 | 114 weeks/<br>Postherpetic<br>Neuralgia    | 75 | 7 weeks  | Gabapentin 1800 mg daily<br>Gabapentin 2400 mg daily<br>Placebo                                                        | ≥50% Reduction in<br>Pain                  |
| Anticonvulsants | Richter 2005         | 246 | Not Reported/<br>Diabetic<br>Neuropathy    | 57 | 6 weeks  | Pregabalin 150 mg daily<br>Pregabalin 600 mg daily<br>Placebo                                                          | ≥50% Reduction in<br>Pain                  |
| Anticonvulsants | Rosenstock<br>2004   | 146 | Not Reported/<br>Diabetic<br>Neuropathy    | 60 | 8 weeks  | Pregabalin 300 mg daily<br>Placebo                                                                                     | ≥50% Reduction in<br>Pain                  |
| Anticonvulsants | Rowbotham<br>1998    | 229 | Not Reported/<br>Postherpetic<br>Neuralgia | 74 | 8 weeks  | Gabapentin 3600 mg daily (max)<br>Placebo                                                                              | PGIC “Much” or<br>“Moderately”<br>Improved |
| Anticonvulsants | Sabatowski<br>2004   | 238 | 169 weeks/<br>Postherpetic<br>Neuralgia    | 72 | 8 weeks  | Pregabalin 150 mg daily<br>Pregabalin 300 mg daily<br>Placebo                                                          | ≥50% Reduction in<br>Pain                  |

|                 |                   |     |                                         |    |          |                                                                                                           |                        |
|-----------------|-------------------|-----|-----------------------------------------|----|----------|-----------------------------------------------------------------------------------------------------------|------------------------|
| Anticonvulsants | Sandercock 2012   | 147 | Not Reported/<br>Diabetic<br>Neuropathy | 59 | 4 weeks  | Gabapentin 3000 mg daily (single)<br>Gabapentin 3000 mg daily (divided 1200 mg AM; 1800 mg PM)<br>Placebo | ≥50% Reduction in Pain |
| Anticonvulsants | Sang 2013         | 452 | 81 weeks/<br>Postherpetic<br>Neuralgia  | 66 | 10 weeks | Gabapentin 1800 mg daily<br>Placebo                                                                       | ≥50% Reduction in Pain |
| Anticonvulsants | Satoh 2011        | 314 | 223 weeks/<br>Diabetic<br>Neuropathy    | 61 | 13 weeks | Pregabalin 150 mg twice daily<br>Pregabalin 300 mg twice daily<br>Placebo                                 | ≥30% Reduction in Pain |
| Anticonvulsants | Shabbir 2011      | 210 | Not Reported/<br>Diabetic<br>Neuropathy | NR | 6 weeks  | Pregabalin 600 mg daily<br>Placebo                                                                        | ≥50% Reduction in Pain |
| Anticonvulsants | Sharma 2006       | 167 | 260 weeks/<br>Diabetic<br>Neuropathy    | 58 | 13 weeks | Pregabalin 300 mg twice daily<br>Placebo                                                                  | ≥50% Reduction in Pain |
| Anticonvulsants | Smith 2014        | 383 | Not Reported/<br>Diabetic<br>Neuropathy | 58 | 15 weeks | Pregabalin 300 mg daily<br>Placebo                                                                        | ≥30% Reduction in Pain |
| Anticonvulsants | Stacey 2008       | 269 | 130 weeks/<br>Postherpetic<br>Neuralgia | 67 | 4 weeks  | Pregabalin Flexible Dose (mean 396 mg daily)<br>Pregabalin Fixed Dose (mean 295.4 mg daily)<br>Placebo    | ≥30% Reduction in Pain |
| Anticonvulsants | Tolle 2008        | 395 | Not Reported/<br>Diabetic<br>Neuropathy | 59 | 12 weeks | Pregabalin 150 mg daily<br>Pregabalin 300 mg daily<br>Pregabalin 600 mg daily<br>Placebo                  | ≥50% Reduction in Pain |
| Anticonvulsants | Van-Seventer 2006 | 368 | 163 weeks/<br>Postherpetic<br>Neuralgia | 71 | 13 weeks | Pregabalin 150 mg daily<br>Pregabalin 300 mg daily<br>Pregabalin 600 mg daily<br>Placebo                  | ≥30% Reduction in Pain |
| Anticonvulsants | Vinik 2014        | 452 | 302 weeks/<br>Diabetic<br>Neuropathy    | 60 | 5 weeks  | Pregabalin 300 mg daily<br>Placebo                                                                        | ≥30% Reduction in Pain |
| Anticonvulsants | Wallace 2010      | 405 | Not Reported/                           | 67 | 10 weeks | Gabapentin 1800 mg daily (single)<br>Gabapentin 1800 mg daily (divided)                                   | ≥50% Reduction in Pain |

|                 |                  |     |                                                                  |    |          |                                                                                                                                |                                        |
|-----------------|------------------|-----|------------------------------------------------------------------|----|----------|--------------------------------------------------------------------------------------------------------------------------------|----------------------------------------|
|                 |                  |     | Postherpetic Neuralgia                                           |    |          | Placebo                                                                                                                        |                                        |
| Anticonvulsants | Zhang 2013       | 371 | Not Reported/<br>Postherpetic Neuralgia                          | 62 | 13 weeks | Gabapentin 1200 mg daily<br>Gabapentin 2400 mg daily<br>Gabapentin 3600 mg daily<br>Placebo                                    | ≥30% Reduction in Pain                 |
| Anticonvulsants | Ziegler 2015     | 132 | 295 weeks/<br>Diabetic Neuropathy                                | 59 | 6 weeks  | Pregabalin 150 mg twice daily<br>Placebo                                                                                       | ≥30% Reduction in Pain                 |
| Opioids         | Freeman 2007     | 313 | 192 weeks/<br>Diabetic Neuropathy                                | 56 | 9 weeks  | Tramadol 37.5 mg/Acetaminophen 325 mg; 1-2 tablets, four times daily<br>Placebo                                                | 30% Improvement in Pain                |
| Opioids         | Hanna 2008       | 338 | Not Reported/<br>Diabetic Neuropathy                             | 60 | 12 weeks | Oxycodone 10-80 mg daily<br>Placebo                                                                                            | PGIC “good” or “very good” improvement |
| Opioids         | Jensen 2006      | 159 | Not Reported/<br>Diabetic Neuropathy                             | 59 | 6 weeks  | Oxycodone 60 mg twice daily<br>Placebo                                                                                         | 33% Reduction in Pain                  |
| Opioids         | NCT01124617 2010 | 91  | Not Reported/<br>Diabetic Neuropathy +<br>Postherpetic Neuralgia | 66 | 12 weeks | Tapentadol 25-250 mg twice daily<br>Placebo                                                                                    | 30% Reduction in Pain                  |
| Opioids         | Simpson 2016     | 186 | Not Reported/<br>Diabetic Neuropathy                             | 63 | 12 weeks | Buprenorphine Patch 5-40 mg/hour<br>Placebo Patch                                                                              | 30% Reduction in Pain                  |
| Opioids         | Zin 2010         | 62  | 189 weeks/<br>Diabetic Neuropathy +<br>Postherpetic Neuralgia    | 68 | 5 weeks  | Oxycodone 2 mg/ml (5 mg) twice daily +<br>Pregabalin (max 300 mg twice daily)<br>Placebo + Pregabalin (max 300 mg twice daily) | 50% Reduction in Pain                  |
| Rubefacients    | Backonja 2008    | 402 | 203 weeks/<br>Postherpetic Neuralgia                             | 71 | 12 weeks | 8% Capsaicin Patch applied once for 60 minutes<br>0.04% Capsaicin Patch                                                        | 30% Reduction in Pain                  |
| Rubefacients    | Bernstein 1989   | 32  | 144 weeks/<br>Postherpetic Neuralgia                             | 72 | 6 weeks  | 0.075% Capsaicin Cream applied 3-4 times daily<br>Vehicle Cream                                                                | ≥40% Pain Improvement                  |

|              |                            |     |                                      |    |          |                                                                                                                                                                                                                                                                                              |                                                                        |
|--------------|----------------------------|-----|--------------------------------------|----|----------|----------------------------------------------------------------------------------------------------------------------------------------------------------------------------------------------------------------------------------------------------------------------------------------------|------------------------------------------------------------------------|
| Rubefacients | Capsaicin Study Group 1992 | 277 | 216 weeks/<br>Diabetic Neuropathy    | 60 | 8 weeks  | 0.075% Capsaicin Cream applied 4 times daily<br>Vehicle Cream                                                                                                                                                                                                                                | PGIC "Improved"                                                        |
| Rubefacients | Irving 2011                | 416 | 166 weeks/<br>Postherpetic Neuralgia | 70 | 12 weeks | 8% Capsaicin Patch; Applied for one, 60-minute session<br>0.04% Capsaicin Placebo Patch                                                                                                                                                                                                      | ≥30% Reduction in Pain                                                 |
| Rubefacients | Moon 2017                  | 60  | 146 weeks/<br>Postherpetic Neuralgia | 70 | 6 weeks  | 0.075% Capsaicin Cream applied 3-4 times daily<br>0.625% Capsaicin Patch applied in 4-day cycles (3 days on, 1 day off)<br>1.25% Capsaicin Patch applied in 4-day cycles (3 days on, 1 day off)<br>Placebo Patch                                                                             | ≥30% Reduction in Pain                                                 |
| Rubefacients | Simpson 2017               | 369 | 299 weeks/<br>Diabetic Neuropathy    | 63 | 12 weeks | 8% Capsaicin Patch (Applied for a single, 30-minute session)<br>Placebo Patch                                                                                                                                                                                                                | ≥30% Reduction in Pain                                                 |
| Rubefacients | Tandan 1992                | 22  | 257 weeks/<br>Diabetic Neuropathy    | 54 | 8 weeks  | 0.075% Capsaicin Cream applied 4 times daily<br>Vehicle Cream                                                                                                                                                                                                                                | Categorical Pain Scale ("improved")                                    |
| Rubefacients | Vinik 2015                 | 468 | 229 weeks/<br>Diabetic Neuropathy    | 60 | 52 weeks | 8% Capsaicin Patch (Applied for 60 minutes for 1-7 treatments with 8-week intervals between each treatment) + Standard of Care<br><br>8% Capsaicin Patch (Applied for 30 minutes for 1-7 treatments with 8-week intervals between each treatment) + Standard of Care<br><br>Standard of Care | ≥30% Pain Improvement                                                  |
| Rubefacients | Watson 1993                | 143 | 128 weeks/<br>Postherpetic Neuralgia | 71 | 6 weeks  | 0.075% Capsaicin Cream applied 4 times daily<br>Vehicle Cream                                                                                                                                                                                                                                | Decreased pain (at least a one-point change on a categoric pain scale) |
| Rubefacients | Webster 2010               | 155 | 153 weeks/<br>Postherpetic Neuralgia | 70 | 12 weeks | 8% Capsaicin Patch; Applied for one, 60-minute session<br>0.04% Capsaicin Placebo Patch                                                                                                                                                                                                      | ≥30% Reduction in Pain                                                 |



|       |                   |     |                                            |    |          |                                                                                                                                           |                                                       |
|-------|-------------------|-----|--------------------------------------------|----|----------|-------------------------------------------------------------------------------------------------------------------------------------------|-------------------------------------------------------|
| SNRIs | Allen 2014        | 408 | 168 weeks/<br>Diabetic<br>Neuropathy       | 60 | 13 weeks | Desvenlafaxine 50 mg daily<br>Desvenlafaxine 100 mg daily<br>Desvenlafaxine 200 mg daily<br>Desvenlafaxine 400 mg daily<br>Placebo        | ≥30% Improvement<br>on Numerical Pain<br>Rating Scale |
| SNRIs | Gao 2010          | 215 | 166 weeks/<br>Diabetic<br>Neuropathy       | 59 | 12 weeks | Duloxetine 60-120 mg daily<br>Placebo                                                                                                     | 30% Reduction in<br>Pain                              |
| SNRIs | Gao 2014          | 405 | 172 weeks/<br>Diabetic<br>Neuropathy       | 61 | 12 weeks | Duloxetine 60 mg daily<br>Placebo                                                                                                         | ≥30% Improvement<br>in Pain                           |
| SNRIs | Goldstein<br>2005 | 457 | 192 weeks/<br>Diabetic<br>Neuropathy       | 60 | 12 weeks | Duloxetine 20 mg daily<br>Duloxetine 60 mg daily<br>Duloxetine 120 mg daily (60mg twice<br>daily)<br>Placebo                              | 50% Reduction in<br>Pain                              |
| SNRIs | Raskin 2005       | 348 | 224 weeks/<br>Diabetic<br>Neuropathy       | 59 | 12 weeks | Duloxetine 60 mg daily<br>Duloxetine 60 mg twice daily<br>Placebo                                                                         | 30% Reduction in<br>Pain                              |
| SNRIs | Rowbotham<br>2005 | 245 | 253 weeks/<br>Diabetic<br>Neuropathy       | 59 | 6 weeks  | Venlafaxine 75 mg daily<br>Venlafaxine 150-225 mg daily<br>Placebo                                                                        | 50% Reduction in<br>Pain                              |
| SNRIs | Wernicke<br>2006  | 334 | 198 weeks/<br>Diabetic<br>Neuropathy       | 61 | 12 weeks | Duloxetine 60 mg daily<br>Duloxetine 60 mg twice daily<br>Placebo                                                                         | 30% Reduction in<br>Pain                              |
| SNRIs | Yasuda 2011       | 339 | 224 weeks/<br>Diabetic<br>Neuropathy       | 61 | 13 weeks | Duloxetine 40 mg daily<br>Duloxetine 60 mg daily<br>Combined Arm (40 mg and 60 mg)<br>Placebo                                             | 30% Reduction in<br>Pain                              |
| TCAs  | Achar 2010        | 45  | Not Reported/<br>Postherpetic<br>Neuralgia | NR | 8 weeks  | Pregabalin 75 mg twice daily<br>Amitriptyline 25 mg daily<br>Combination Amitriptyline 25 mg once<br>daily + Pregabalin 75 mg twice daily | ≥75% Improvement<br>in Pain                           |
| TCAs  | Shabbir 2011      | 210 | Not Reported/<br>Diabetic<br>Neuropathy    | NR | 6 weeks  | Amitriptyline 10 mg daily (max dose 75<br>mg daily)<br>Placebo                                                                            | ≥50% Improvement<br>in Pain                           |

NR: Not Reported; PGIC: Patient Global Impression of Change; SNRIs: Serotonin–Norepinephrine Reuptake Inhibitors; TCAs: Tricyclic Antidepressants

**Table 3: Overall proportion of patients with meaningful response at less than or equal to four weeks, four to twelve weeks and at greater than twelve weeks**

| Intervention Type        | Number of RCTs | Subgroup                           | Intervention Event Rate          | Control Event Rate               | Risk Ratio (95% CI)                | NNT        |
|--------------------------|----------------|------------------------------------|----------------------------------|----------------------------------|------------------------------------|------------|
| Acupuncture              | <b>3</b>       | <b>Overall Efficacy</b>            | <b>22%</b><br><b>(27/121)</b>    | <b>13%</b><br><b>(16/126)</b>    | <b>RR 1.81 (95% CI 0.55, 5.98)</b> | <b>NSS</b> |
|                          | -              | Assessed at: ≤4 weeks              | -                                | -                                | -                                  | -          |
|                          | 3              | Assessed at: >4 weeks to <12 weeks | 22%<br>(27/121)                  | 13%<br>(16/126)                  | RR 1.81 (95% CI 0.55, 5.98)        | NSS        |
|                          | -              | Assessed at: ≥12 weeks             | -                                | -                                | -                                  | -          |
| Anticonvulsants          | <b>40</b>      | <b>Overall Efficacy</b>            | <b>46%</b><br><b>(2698/5837)</b> | <b>30%</b><br><b>(1120/3738)</b> | <b>RR 1.54 (95% CI 1.45, 1.63)</b> | <b>7</b>   |
|                          | 6              | Assessed at: ≤4 weeks              | 49%<br>(211/431)                 | 21%<br>(63/300)                  | RR 2.26 (95% CI 1.78, 2.87)        | 4          |
|                          | 20             | Assessed at: >4 weeks to <12 weeks | 45%<br>(1202/2659)               | 29%<br>(627/2128)                | RR 1.56 (95% CI 1.44, 1.68)        | 7          |
|                          | 14             | Assessed at: ≥12 weeks             | 47%<br>(1285/2747)               | 33%<br>(430/1310)                | RR 1.42 (95% CI 1.30, 1.55)        | 8          |
| Opioids                  | <b>6</b>       | <b>Overall Efficacy</b>            | <b>49%</b><br><b>(289/593)</b>   | <b>36%</b><br><b>(198/556)</b>   | <b>RR 1.37 (95% CI 1.19, 1.57)</b> | <b>8</b>   |
|                          | 1              | Assessed at: ≤4 weeks              | 41%<br>(12/29)                   | 36%<br>(12/33)                   | RR 1.14 (95% CI 0.61, 2.13)        | NSS        |
|                          | 3              | Assessed at: >4 weeks to <12 weeks | 52%<br>(142/271)                 | 37%<br>(96/263)                  | RR 1.45 (95% CI 1.19, 1.76)        | 7          |
|                          | 3              | Assessed at: ≥12 weeks             | 46%<br>(147/322)                 | 35%<br>(102/293)                 | RR 1.30 (95% CI 1.07, 1.58)        | 10         |
| Rubefaciants (Capsaicin) | <b>10</b>      | <b>Overall Efficacy</b>            | <b>49%</b><br><b>(635/1303)</b>  | <b>34%</b><br><b>(350/1041)</b>  | <b>RR 1.40 (95% CI 1.26, 1.55)</b> | <b>7</b>   |
|                          | 2              | Assessed at: ≤4 weeks              | 30%<br>(27/90)                   | 19%<br>(16/85)                   | RR 1.60 (95% CI 0.93, 2.75)        | NSS        |
|                          | 8              | Assessed at: >4 weeks to <12 weeks | 41%<br>(365/888)                 | 30%<br>(254/833)                 | RR 1.37 (95% CI 1.20, 1.56)        | 10         |

|              |          |                                        |                                 |                                |                                    |          |
|--------------|----------|----------------------------------------|---------------------------------|--------------------------------|------------------------------------|----------|
|              | 5        | Assessed at: $\geq 12$ weeks           | 52%<br>(529/1018)               | 36%<br>(288/792)               | RR 1.36 (95% CI 1.22, 1.52)        | 7        |
| <b>SNRIs</b> | <b>8</b> | <b>Overall Efficacy</b>                | <b>57%</b><br><b>(995/1759)</b> | <b>41%</b><br><b>(405/987)</b> | <b>RR 1.45 (95% CI 1.33, 1.59)</b> | <b>7</b> |
|              | -        | Assessed at: $\leq 4$ weeks            | -                               | -                              | -                                  | -        |
|              | 1        | Assessed at: $>4$ weeks to $<12$ weeks | 47%<br>(77/164)                 | 35%<br>(28/81)                 | RR 1.36 (95% CI 0.97, 1.91)        | NSS      |
|              | 7        | Assessed at: $\geq 12$ weeks           | 58%<br>(918/1595)               | 42%<br>(377/906)               | RR 1.46 (95% CI 1.34, 1.60)        | 7        |
| <b>TCAs</b>  | <b>2</b> | <b>Overall Efficacy</b>                | <b>78%</b><br><b>(66/85)</b>    | <b>26%</b><br><b>(22/85)</b>   | <b>RR 3.00 (95% CI 2.05, 4.38)</b> | <b>8</b> |
|              | -        | Assessed at: $\leq 4$ weeks            | -                               | -                              | -                                  | -        |
|              | 2        | Assessed at: $>4$ weeks to $<12$ weeks | 78%<br>(66/85)                  | 26%<br>(22/85)                 | RR 3.00 (95% CI 2.05, 4.38)        | 8        |
|              | -        | Assessed at: $\geq 12$ weeks           | -                               | -                              | -                                  | -        |

CI: Confidence Interval; NNT: Number Needed to Treat; NSS: Not Statistically Significant; RCTs: Randomized Controlled Trials; RR: Risk Ratio; SNRIs: Serotonin–Norepinephrine Reuptake Inhibitors; TCAs: Tricyclic Antidepressants

**Table 4: Overall proportion of patients with meaningful response at longest follow-up point after intervention (ordered by certainty of evidence)**

| Intervention Type      | Certainty of Evidence (GRADE) | Number of RCTs | Intervention Event Rate | Control Event Rate | Outcome Measured At | Risk Ratio (95% CI)                                                                                         | NNT          |
|------------------------|-------------------------------|----------------|-------------------------|--------------------|---------------------|-------------------------------------------------------------------------------------------------------------|--------------|
| <b>Anticonvulsants</b> | Moderate                      | 40             | 46%<br>(2698/5837)      | 30%<br>(1120/3738) | 2 to 16 weeks       | RR 1.54 (95% CI<br>1.45, 1.63)                                                                              | 7            |
| <b>SNRIs</b>           | Moderate                      | 8              | 57%<br>(995/1759)       | 41%<br>(405/987)   | 6 to 13 weeks       | RR 1.45 (95% CI<br>1.33 1.59)                                                                               | 7            |
| <b>Opioids</b>         | Low                           | 6              | 49%<br>(289/593)        | 36%<br>(198/556)   | 5 to 12 weeks       | RR 1.37 (95% CI<br>1.19, 1.57)                                                                              | 8            |
| <b>Rubefaciants</b>    | Low                           | 10             | 49%<br>(635/1303)       | 34%<br>(350/1041)  | 6 to 52 weeks       | RR 1.40 (95% CI<br>1.26, 1.55)                                                                              | 7            |
| <b>Acupuncture</b>     | Very Low                      | 3              | 22%<br>(27/121)         | 13%<br>(16/126)    | 8 to 10 weeks       | RR 1.81 (95% CI<br>0.55, 5.98)                                                                              | NSS          |
| <b>TCAs</b>            | Very Low                      | 2              | 78%<br>(66/85)          | 26%<br>(22/85)     | 6-8 weeks           | RR 3.00 (95% CI<br>2.05, 4.38)<br>(Fixed Effects)<br><br>RR 2.35 (95% CI<br>0.79, 6.95)<br>(Random Effects) | 2<br><br>NSS |

CI: Confidence Interval; GRADE: Grading of Recommendations, Assessment, Development and Evaluations; NNT: Number Needed to Treat; NSS: Not Statistically Significant; RCTs: Randomized Controlled Trials; RR: Risk Ratio; SNRIs: Serotonin Norepinephrine Reuptake Inhibitors; TCAs: Tricyclic Antidepressants

**Table 5: Proportion of patients with clinically meaningful response based on funding source (clearly publicly or industry funding)**

| Intervention Type      | Number of RCTs | Subgroup         | Intervention Event Rate | Control Event Rate | Risk Ratio (95% CI)            | NNT | p-value* |
|------------------------|----------------|------------------|-------------------------|--------------------|--------------------------------|-----|----------|
| <b>Acupuncture</b>     | 3              | Public Funding   | 22%<br>(27/121)         | 13%<br>(16/126)    | RR 1.81 (95% CI<br>0.55, 5.98) | NSS | NA       |
|                        | -              | Industry Funding | -                       | -                  | -                              | -   |          |
| <b>Anticonvulsants</b> | -              | Public Funding   | -                       | -                  | -                              | -   | NA       |
|                        | 37             | Industry Funding | 45%<br>(2609/5735)      | 30%<br>(1102/3642) | RR 1.49 (95% CI<br>1.41, 1.58) | 7   |          |
| <b>Opioids</b>         | 1              | Public Funding   | 52%<br>(15/29)          | 58%<br>(19/33)     | RR 0.90 (95% CI<br>0.57, 1.42) | NSS | P=0.06   |
|                        | 5              | Industry Funding | 49%<br>(274/564)        | 34%<br>(179/523)   | RR 1.41 (95% CI<br>1.22, 1.64) | 7   |          |
| <b>Rubefaciants</b>    | -              | Public Funding   | -                       | -                  | -                              | -   | NA       |
|                        | 10             | Industry Funding | 49%<br>(635/1303)       | 34%<br>(350/1041)  | RR 1.40 (95% CI<br>1.26, 1.55) | 7   |          |
| <b>SNRIs</b>           | -              | Public Funding   | -                       | -                  | -                              | -   | NA       |
|                        | 8              | Industry Funding | 57%<br>(995/1759)       | 41%<br>(405/987)   | RR 1.45 (95% CI<br>1.33, 1.59) | 7   |          |

CI: Confidence Interval; NA: Not Applicable; NNT: Number Needed to Treat; NSS: Not Statistically Significant; RCTs: Randomized Controlled Trials; RR: Risk Ratio; SNRIs: Serotonin–Norepinephrine Reuptake Inhibitors

\*A p-value of <0.05 would indicate that different sources of funding have statistically different effects on the outcome of interest.

**Table 6: Proportion of patients with clinically meaningful response based on median risk of bias scores**

| Intervention Type      | Number of RCTs | Subgroup                                               | Intervention Event Rate | Control Event Rate | Risk Ratio (95% CI)         | NNT | p-value† |
|------------------------|----------------|--------------------------------------------------------|-------------------------|--------------------|-----------------------------|-----|----------|
| <b>Anticonvulsants</b> | 16             | Less than the median risk of bias score                | 48%<br>(995/2083)       | 33%<br>(527/1574)  | RR 1.41 (95% CI 1.30, 1.54) | 7   | P=0.01   |
|                        | 24             | Greater than or equal to the median risk of bias score | 45%<br>(1703/3754)      | 27%<br>(593/2164)  | RR 1.64 (95% CI 1.51, 1.77) | 6   |          |
| <b>Opioids</b>         | 3              | Less than the median risk of bias score                | 44%<br>(124/280)        | 32%<br>(90/279)    | RR 1.38 (95% CI 1.12, 1.72) | 9   | P=0.88   |
|                        | 3              | Greater than or equal to the median risk of bias score | 53%<br>(165/313)        | 39%<br>(108/277)   | RR 1.36 (95% CI 1.13, 1.62) | 8   |          |
| <b>Rubefaciants</b>    | 5              | Less than the median risk of bias score                | 45%<br>(326/721)        | 34%<br>(225/653)   | RR 1.29 (95% CI 1.13, 1.48) | 10  | P=0.08   |
|                        | 5              | Greater than or equal to the median risk of bias score | 53%<br>(309/582)        | 32%<br>(125/388)   | RR 1.56 (95% CI 1.32, 1.83) | 5   |          |
| <b>SNRIs</b>           | 4              | Less than the median risk of bias score                | 55%<br>(619/1116)       | 37%<br>(157/428)   | RR 1.56 (95% CI 1.37, 1.79) | 6   | P=0.12   |
|                        | 4              | Greater than or equal to the median risk of bias score | 58%<br>(376/643)        | 44%<br>(248/559)   | RR 1.36 (95% CI 1.21, 1.52) | 8   |          |

CI: Confidence Interval; NNT: Number Needed to Treat; RCTs: Randomized Controlled Trials; RR: Risk Ratio; SNRIs: Serotonin–Norepinephrine Reuptake Inhibitors

\*For each intervention, a median risk of bias score was calculated and trials were then grouped based on whether they fell at or above the median (higher risk of bias) or below the median (lower risk of bias). Only interventions with at least four trials were included in this subgroup analysis.

†A p-value of <0.05 would indicate that quality scores lying above and below the median risk of bias score have statistically different effects on the outcome of interest.

**Table 7: Proportion of patients with clinically meaningful response based on neuropathic pain type**

| Intervention Type      | Number of RCTs | Subgroup             | Intervention Event Rate | Control Event Rate | Risk Ratio (95% CI)            | NNT | p-value* |
|------------------------|----------------|----------------------|-------------------------|--------------------|--------------------------------|-----|----------|
| <b>Acupuncture</b>     | 2              | DN                   | 24%<br>(22/91)          | 7%<br>(7/94)       | RR 3.35 (95% CI<br>1.53, 7.33) | 6   | P=0.006  |
|                        | 1              | PHN                  | 17%<br>(5/30)           | 28%<br>(9/32)      | RR 0.59 (95% CI<br>0.22, 1.57) | NSS |          |
|                        | -              | Trigeminal Neuralgia | -                       | -                  | -                              | -   |          |
| <b>Anticonvulsants</b> | 24             | DN                   | 47%<br>(1377/2947)      | 33%<br>(720/2185)  | RR 1.42 (95% CI<br>1.32, 1.53) | 8   | P=0.0008 |
|                        | 14             | PHN                  | 42%<br>(1020/2411)      | 23%<br>(323/1386)  | RR 1.81 (95% CI<br>1.62, 2.01) | 6   |          |
|                        | -              | Trigeminal Neuralgia | -                       | -                  | -                              | -   |          |
|                        | 2              | Mixed Population     | 63%<br>(301/479)        | 46%<br>(77/167)    | RR 1.39 (95% CI<br>1.15, 1.66) | 6   |          |
| <b>Opioids</b>         | 4              | DN                   | 49%<br>(245/504)        | 34%<br>(166/492)   | RR 1.44 (95% CI<br>1.24, 1.68) | 7   | P=0.07   |
|                        | -              | PHN                  | -                       | -                  | -                              | -   |          |
|                        | -              | Trigeminal Neuralgia | -                       | -                  | -                              | -   |          |
|                        | 2              | Mixed Population     | 49%<br>(44/89)          | 50%<br>(32/64)     | RR 1.02 (95% CI<br>0.73, 1.43) | NSS |          |
| <b>Rubefacients</b>    | 4              | DN                   | 54%<br>(347/648)        | 34%<br>(168/488)   | RR 1.45 (95% CI<br>1.25, 1.67) | 6   | P=0.48   |
|                        | 6              | PHN                  | 44%<br>(288/655)        | 33%<br>(182/553)   | RR 1.34 (95% CI<br>1.16, 1.55) | 10  |          |
|                        | -              | Trigeminal Neuralgia | -                       | -                  | -                              | -   |          |
| <b>SNRIs</b>           | 8              | DN                   | 57%<br>(995/1759)       | 41%<br>(405/987)   | RR 1.45 (95% CI<br>1.33, 1.59) | 7   | NA       |
|                        | -              | PHN                  | -                       | -                  | -                              | -   |          |
|                        | -              | Trigeminal Neuralgia | -                       | -                  | -                              | -   |          |

|              |   |                      |                |                |                                |     |         |
|--------------|---|----------------------|----------------|----------------|--------------------------------|-----|---------|
| <b>TCA</b> s | 1 | DN                   | 79%<br>(55/70) | 20%<br>(14/70) | RR 3.93 (95% CI<br>2.42, 6.38) | 2   | P=0.006 |
|              | 1 | PHN                  | 73%<br>(11/15) | 53%<br>(8/15)  | RR 1.38 (95% CI<br>0.78, 2.41) | NSS |         |
|              | - | Trigeminal Neuralgia | -              | -              | -                              | -   |         |

CI: Confidence Interval; DN: Diabetic Neuropathy; NA: Not Applicable; NNT: Number Needed to Treat; NSS: Not Statistically Significant; PHN: Postherpetic Neuralgia; RCTs: Randomized Controlled Trials; RR: Risk Ratio; SNRIs: Serotonin–Norepinephrine Reuptake Inhibitors; TCAs: Tricyclic Antidepressants

\* A p-value of <0.05 would indicate that different types of neuropathic pain have statistically different effects on the outcome of interest.



**Table 8: Proportion of patients with clinically meaningful response based on drug type**

| Intervention Type      | Number of RCTs | Subgroup                                          | Intervention Event Rate | Control Event Rate | Risk Ratio (95% CI)            | NNT | p-value* |
|------------------------|----------------|---------------------------------------------------|-------------------------|--------------------|--------------------------------|-----|----------|
| <b>Anticonvulsants</b> | 10             | Gabapentin                                        | 43%<br>(678/1578)       | 25%<br>(246/974)   | RR 1.60 (95% CI<br>1.42, 1.81) | 6   | P=0.17   |
|                        | 27             | Pregabalin                                        | 48%<br>(1747/3650)      | 31%<br>(758/2419)  | RR 1.56 (95% CI<br>1.45, 1.67) | 7   |          |
|                        | 3              | Oxcarbazepine                                     | 43%<br>(170/395)        | 33%<br>(79/236)    | RR 1.22 (95% CI<br>0.98, 1.52) | NSS |          |
|                        | 1              | Topiramate                                        | 48%<br>(103/214)        | 34%<br>(37/109)    | RR 1.42 (95% CI<br>1.05, 1.91) | 8   |          |
| <b>Rubefaciants</b>    | 5              | Frequent Application (Creams or Low Dose Patches) | 37%<br>(106/285)        | 25%<br>(62/249)    | RR 1.56 (95% CI<br>1.20, 2.03) | 9   | P=0.35   |
|                        | 5              | Less Frequent Application (High Potency Patches)  | 52%<br>(529/1018)       | 36%<br>(288/792)   | RR 1.36 (95% CI<br>1.22, 1.52) | 7   |          |
| <b>SNRIs</b>           | 6              | Duloxetine                                        | 59%<br>(759/1279)       | 42%<br>(344/817)   | RR 1.48 (95% CI<br>1.34, 1.62) | 6   | P=0.48   |
|                        | 2              | Venlafaxine/Desvenlafaxine                        | 49%<br>(236/480)        | 36%<br>(61/170)    | RR 1.35 (95% CI<br>1.08, 1.69) | 8   |          |

CI: Confidence Interval; NNT: Number Needed to Treat; RCTs: Randomized Controlled Trials; RR: Risk Ratio; SNRIs: Serotonin-Norepinephrine Reuptake Inhibitors

\*A p-value of <0.05 would indicate that different drugs within a drug class have statistically different effects on the outcome of interest.

**Table 9: Proportion of patients with clinically meaningful response based on sample size**

| Intervention Type      | Number of RCTs | Subgroup      | Intervention Event Rate | Control Event Rate | Risk Ratio (95% CI)            | NNT | p-value* |
|------------------------|----------------|---------------|-------------------------|--------------------|--------------------------------|-----|----------|
| <b>Acupuncture</b>     | 3              | ≤150 patients | 22%<br>(27/121)         | 13%<br>(16/126)    | RR 1.81 (95% CI<br>0.55, 5.98) | NSS | NA       |
|                        | -              | >150 patients | -                       | -                  | -                              | -   |          |
| <b>Anticonvulsants</b> | 21             | ≤150 patients | 46%<br>(1302/2846)      | 28%<br>(417/1501)  | RR 1.66 (95% CI<br>1.51, 1.81) | 6   | P=0.03   |
|                        | 20             | >150 patients | 47%<br>(1396/2991)      | 31%<br>(703/2237)  | RR 1.46 (95% CI<br>1.35, 1.57) | 7   |          |
| <b>Opioids</b>         | 2              | ≤150 patients | 49%<br>(44/89)          | 50%<br>(32/64)     | RR 1.02 (95% CI<br>0.73, 1.43) | NSS | P=0.07   |
|                        | 4              | >150 patients | 49%<br>(245/504)        | 34%<br>(166/492)   | RR 1.44 (95% CI<br>1.24, 1.68) | 7   |          |
| <b>Rubefaciants</b>    | 4              | ≤150 patients | 37%<br>(54/147)         | 16%<br>(18/110)    | RR 2.35 (95% CI<br>1.49, 3.73) | 5   | P=0.02   |
|                        | 6              | >150 patients | 50%<br>(581/1156)       | 36%<br>(332/931)   | RR 1.34 (95% CI<br>1.21, 1.49) | 7   |          |
| <b>SNRIs</b>           | 2              | ≤150 patients | 49%<br>(236/480)        | 36%<br>(61/170)    | RR 1.35 (95% CI<br>1.08, 1.69) | 8   | P=0.48   |
|                        | 6              | >150 patients | 59%<br>(759/1279)       | 42%<br>(344/817)   | RR 1.48 (95% CI<br>1.34, 1.62) | 6   |          |
| <b>TCAs</b>            | 2              | ≤150 patients | 78%<br>(66/85)          | 26%<br>(22/85)     | RR 3.00 (95% CI<br>2.05, 4.38) | 2   | NA       |
|                        | -              | >150 patients | -                       | -                  | -                              | -   |          |

CI: Confidence Interval; NA: Not Applicable; NNT: Number Needed to Treat; NSS: Not Statistically Significant; RCTs: Randomized Controlled Trials; RR: Risk Ratio; SNRIs: Serotonin–Norepinephrine Reuptake Inhibitors; TCAs: Tricyclic Antidepressants

\*A p-value of <0.05 would indicate that smaller and larger trials have statistically different effects on the outcome of interest.

**Table 10: Proportion of patients with clinically meaningful response based on sham or not-sham control group**

| Intervention Type | Number of RCTs | Subgroup            | Intervention Event Rate | Control Event Rate | Risk Ratio (95% CI)            | NNT | p-value* |
|-------------------|----------------|---------------------|-------------------------|--------------------|--------------------------------|-----|----------|
| Acupuncture       | 2              | Non-Sham Comparator | 15%<br>(14/93)          | 13%<br>(12/95)     | RR 1.27 (95% CI<br>0.26, 6.29) | NSS | P=0.28   |
|                   | 1              | Sham Comparator     | 46%<br>(13/28)          | 13%<br>(4/31)      | RR 3.60 (95% CI<br>1.33, 9.76) | 3   |          |

CI: Confidence Interval; NNT: Number Needed to Treat; NSS: Not Statistically Significant; RCTs: Randomized Controlled Trials; RR: Risk Ratio

\*A p-value of <0.05 would indicate that sham and non-sham comparators have statistically different effects on the outcome of interest.

## Data Analysis

### Acupuncture

Figure 1.1: Acupuncture versus control; Outcome: Proportion of patients with a meaningful response to treatment

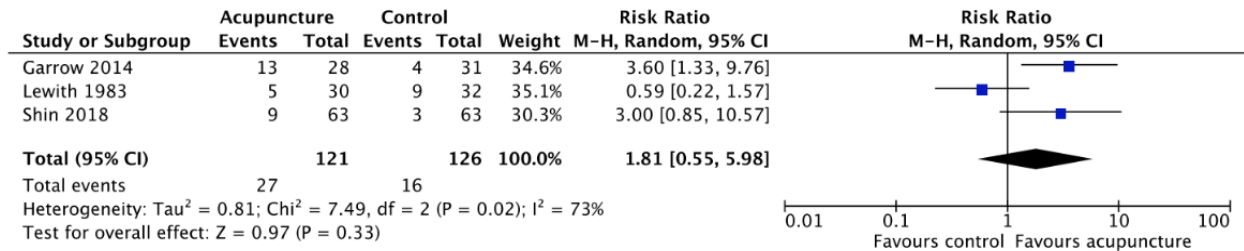

Figure 1.2: Acupuncture versus control; Outcome: Proportion of patients with a meaningful response to treatment at 4 weeks or less, 4 weeks to 12 weeks, and 12 weeks or greater

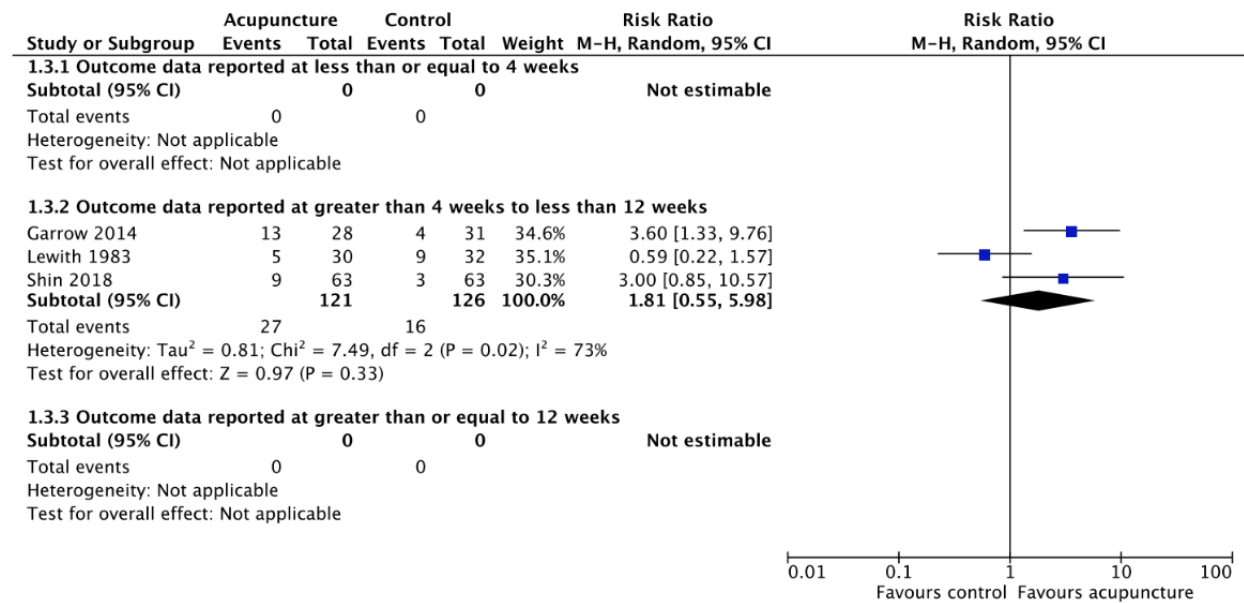

Figure 1.3: Acupuncture versus control; Subgroup analysis: Proportion of patients with a meaningful response to treatment, analyzed by study funding source

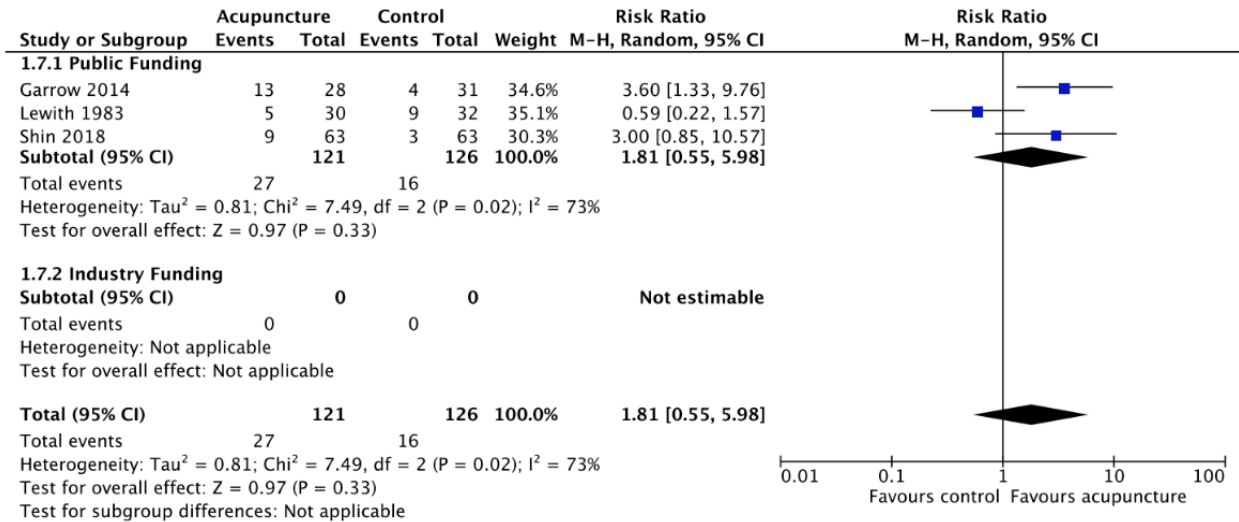

Figure 1.4: Acupuncture versus control; Subgroup analysis: Proportion of patients with a meaningful response to treatment, analyzed by neuropathic pain type

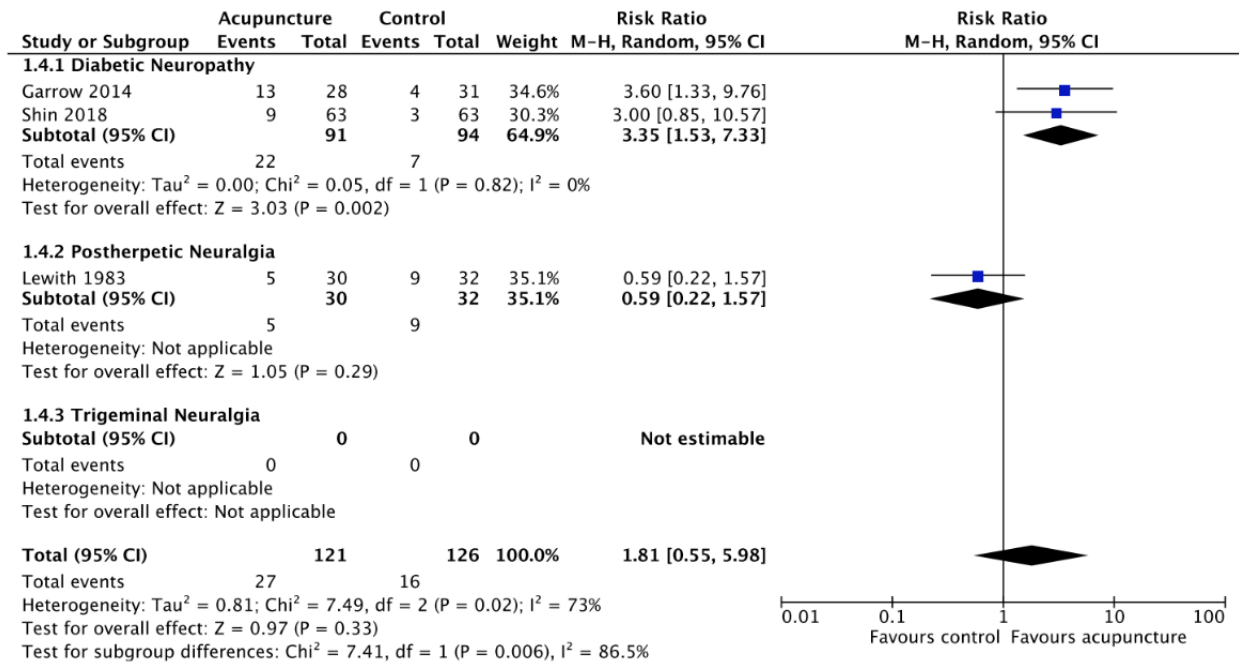

Figure 1.5: Acupuncture versus control; Subgroup analysis: Proportion of patients with a meaningful response to treatment, analyzed by sample size

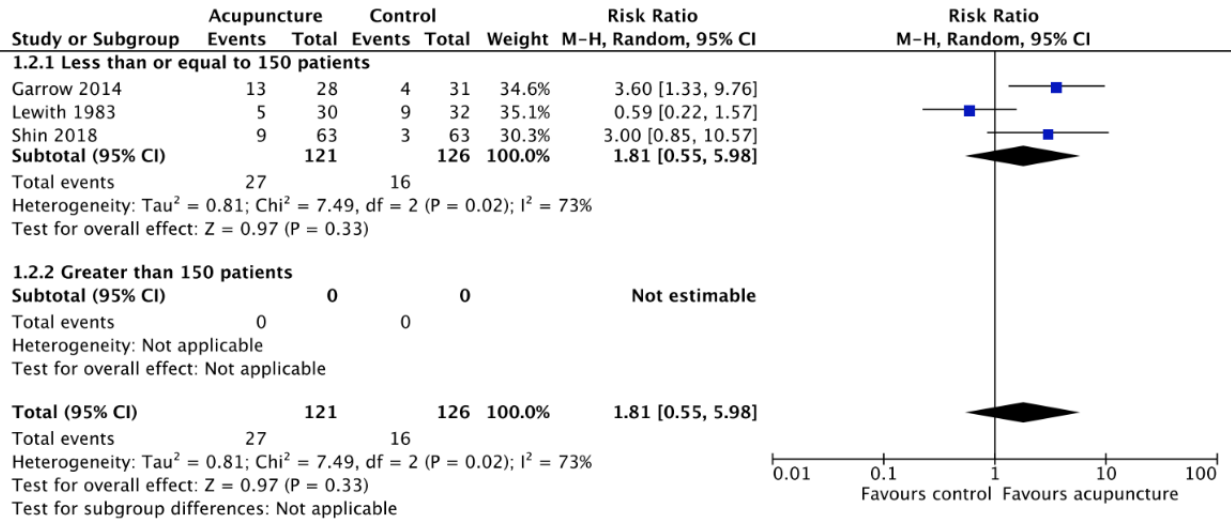

Figure 1.6: Acupuncture versus control; Subgroup analysis: Proportion of patients with a meaningful response to treatment, analyzed by control group characteristics

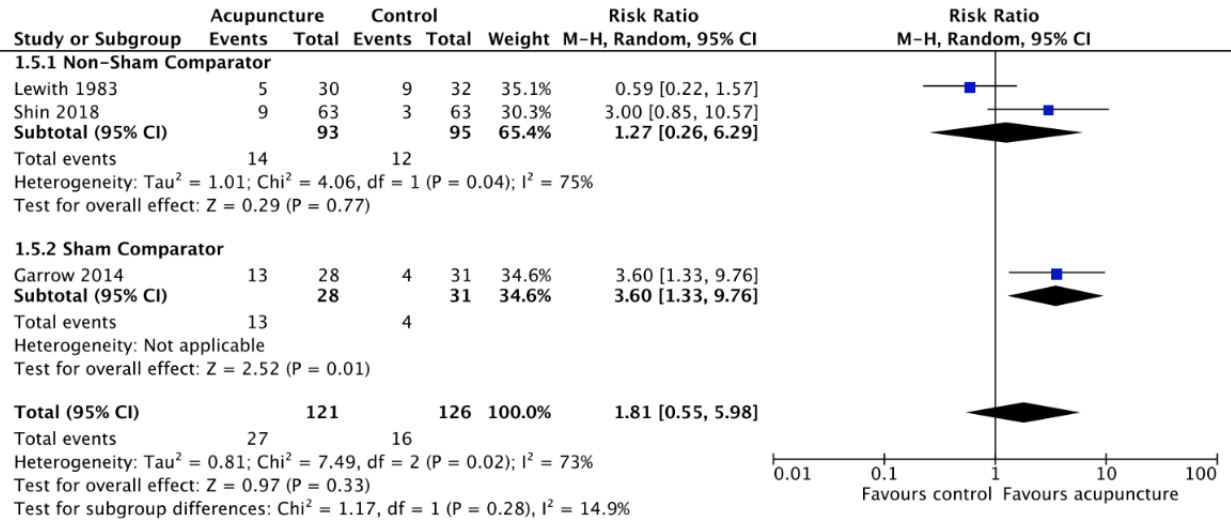

## Anticonvulsants

Figure 2.1: Anticonvulsants versus control; Subgroup analysis: Proportion of patients with a meaningful response to treatment, analyzed by drug type

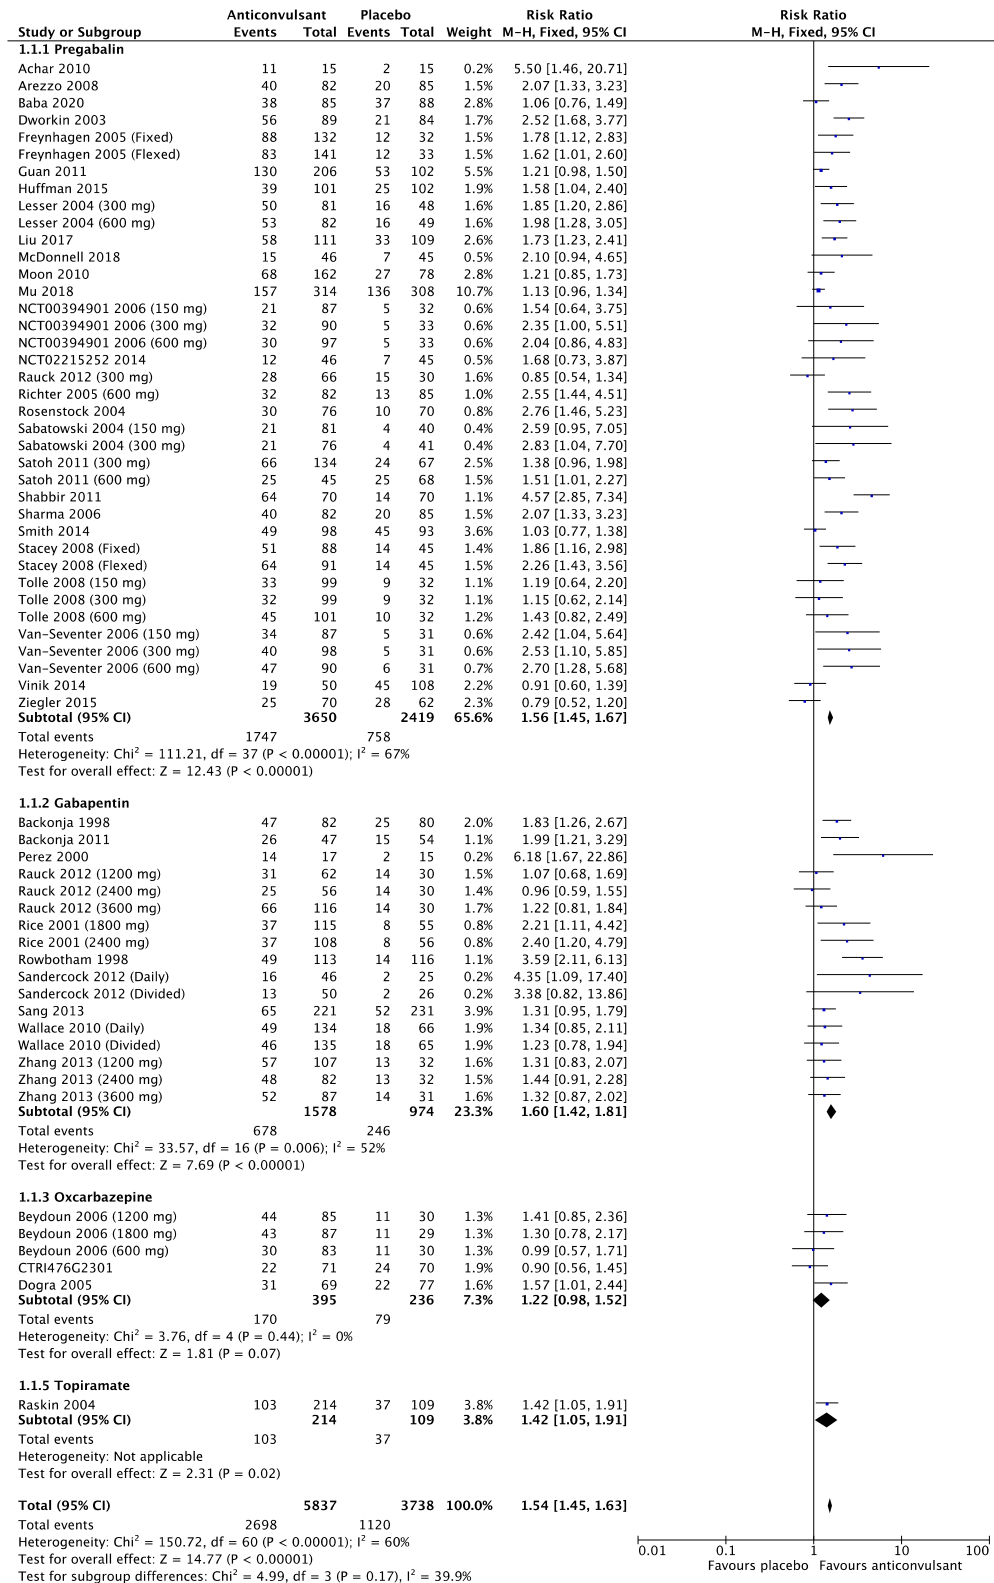

Figure 2.2: Anticonvulsants versus control; Outcome: Proportion of patients with a meaningful response to treatment at 4 weeks or less, 4 weeks to 12 weeks, and 12 weeks or greater

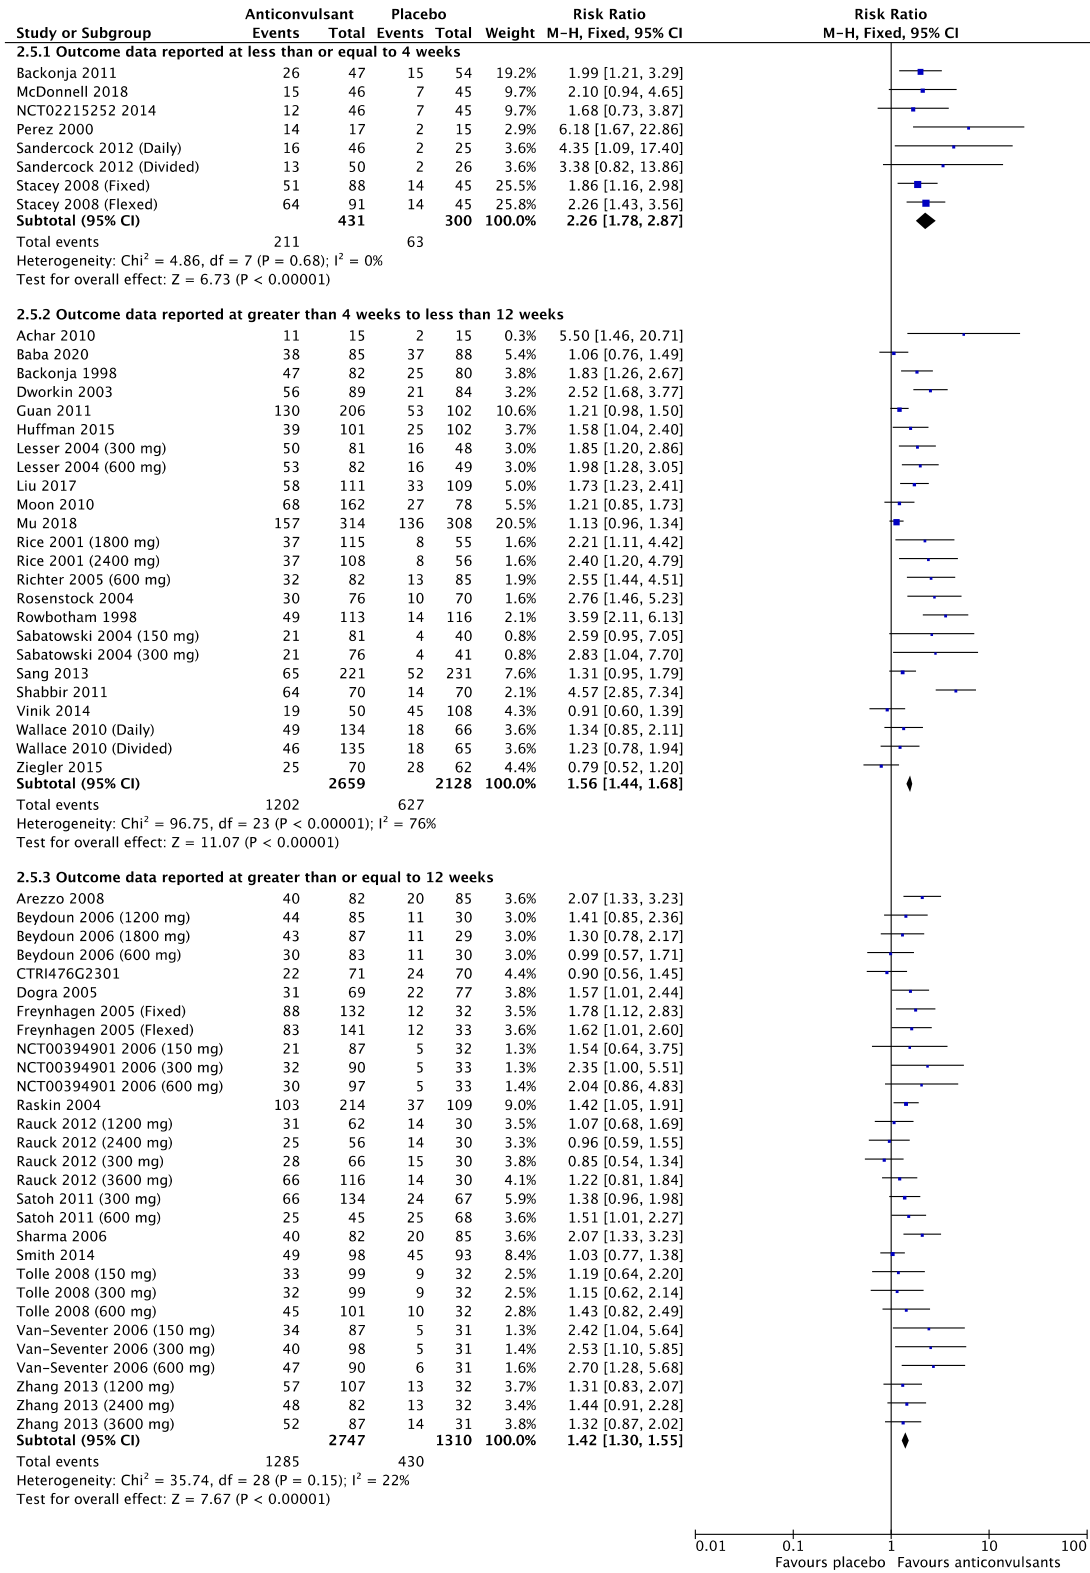



Figure 2.3: Anticonvulsants versus control; Subgroup analysis: Proportion of patients with a meaningful response to treatment, analyzed by study funding source

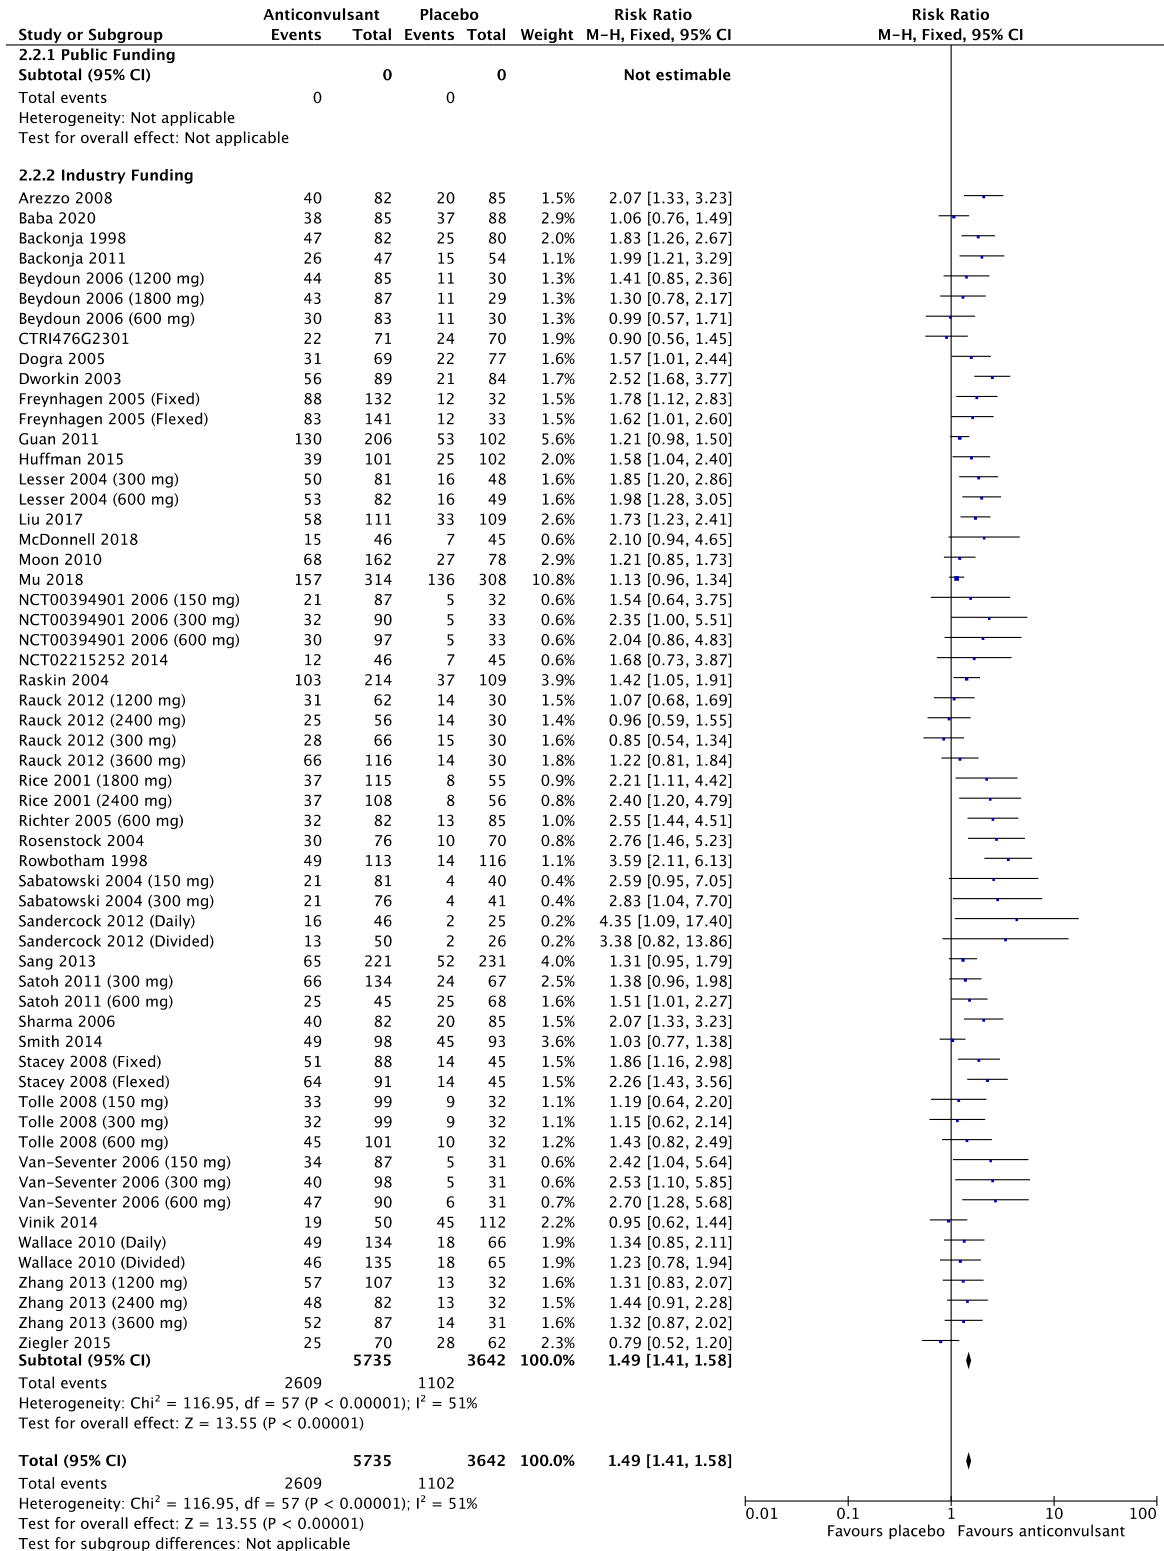

Figure 2.4: Anticonvulsants versus control; Subgroup analysis: Proportion of patients with a meaningful response to treatment, analyzed by median risk of bias

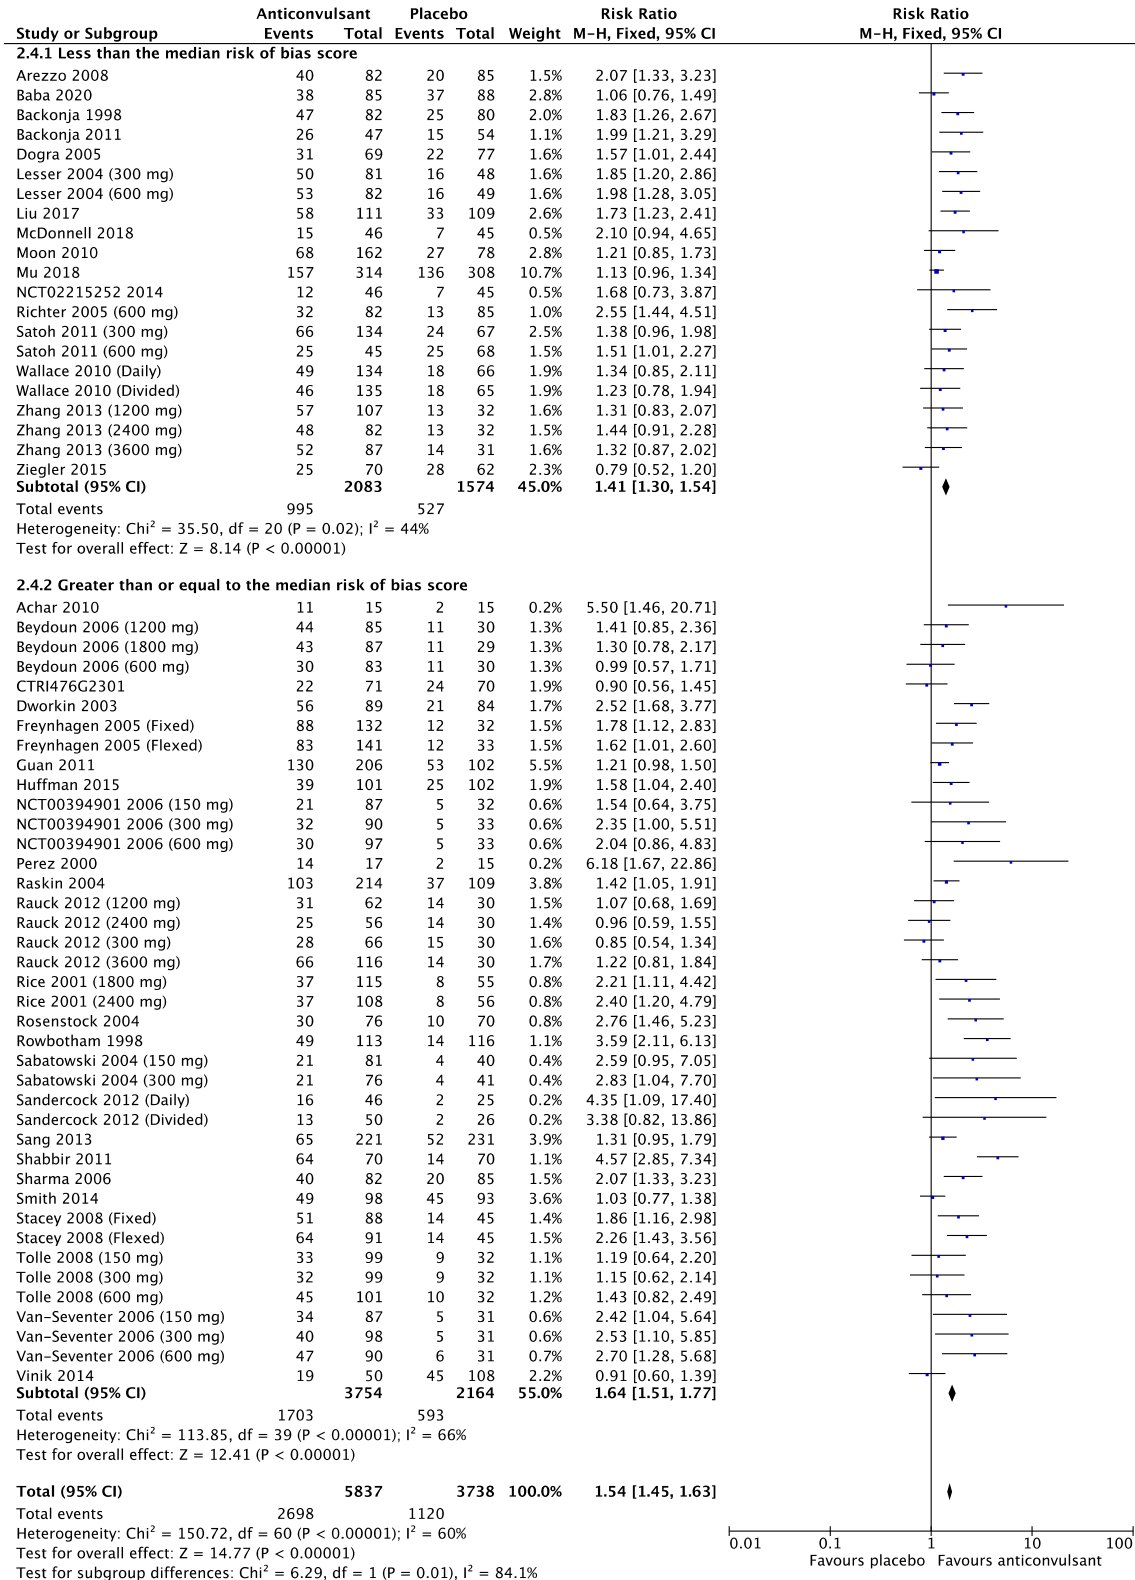

*For each study, the risk of bias domain was scored (0=low risk, 1=unclear risk, 2=high risk) and a median was found among all the studies within each intervention. Studies were then divided into two categories: less than the median or greater than or equal to the median. (Higgins 2011)*

Figure 2.5: Anticonvulsants versus control; Subgroup analysis: Proportion of patients with a meaningful response to treatment, analyzed by neuropathic pain type

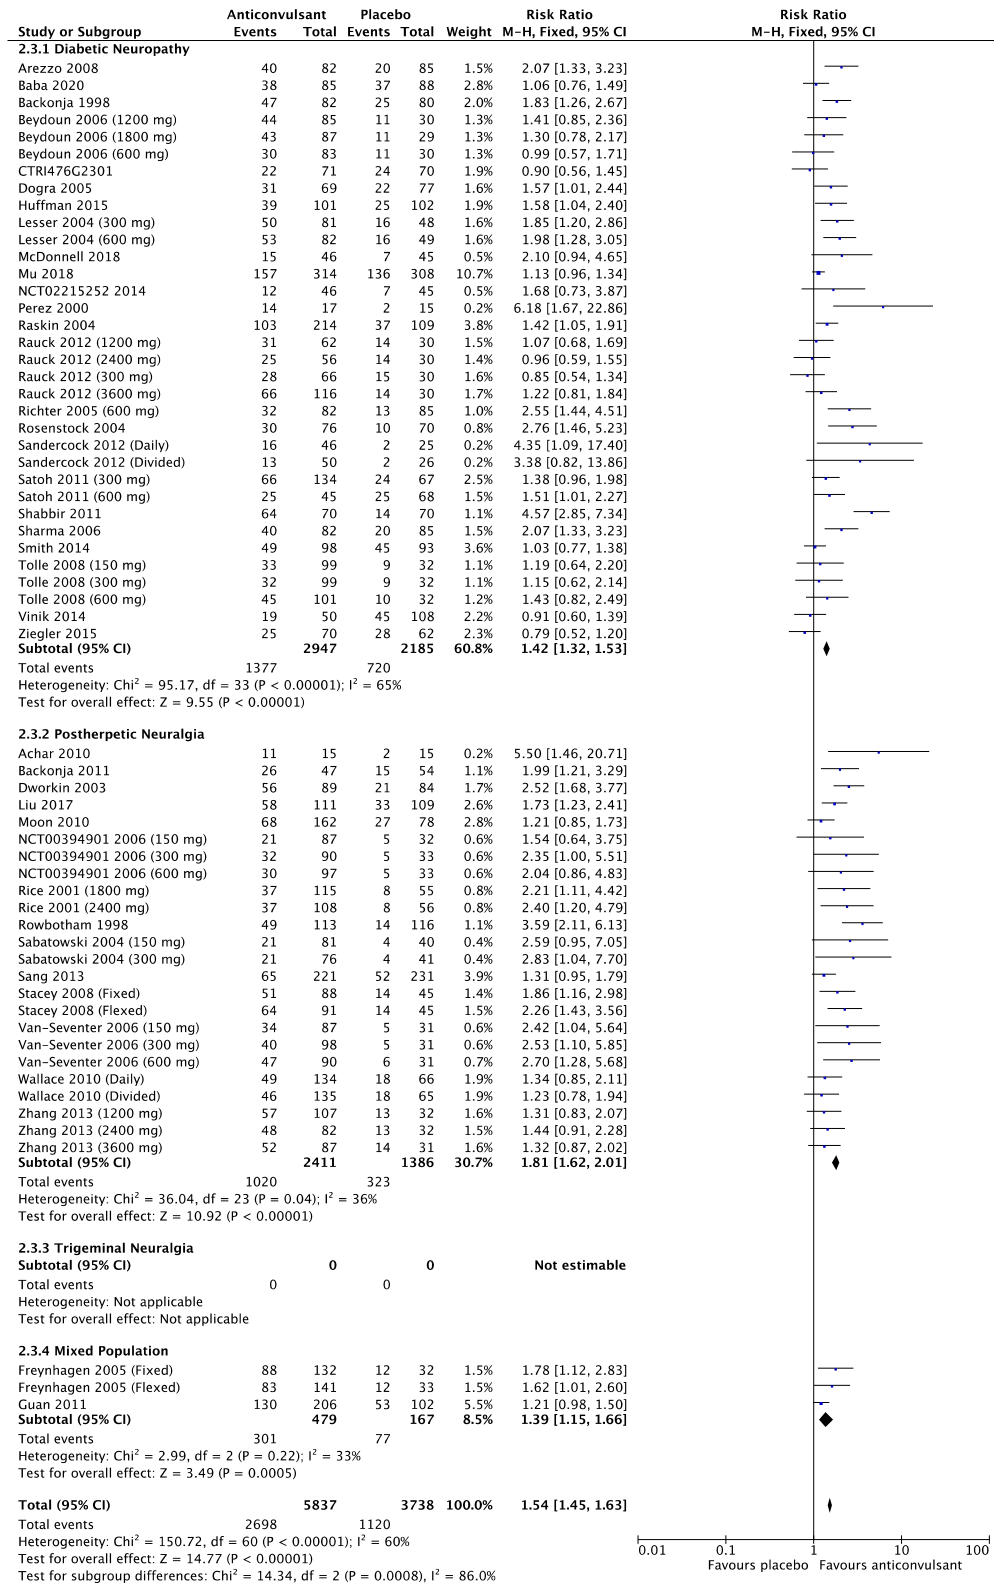



Figure 2.6: Anticonvulsants versus control; Subgroup analysis: Proportion of patients with a meaningful response to treatment, analyzed by sample size

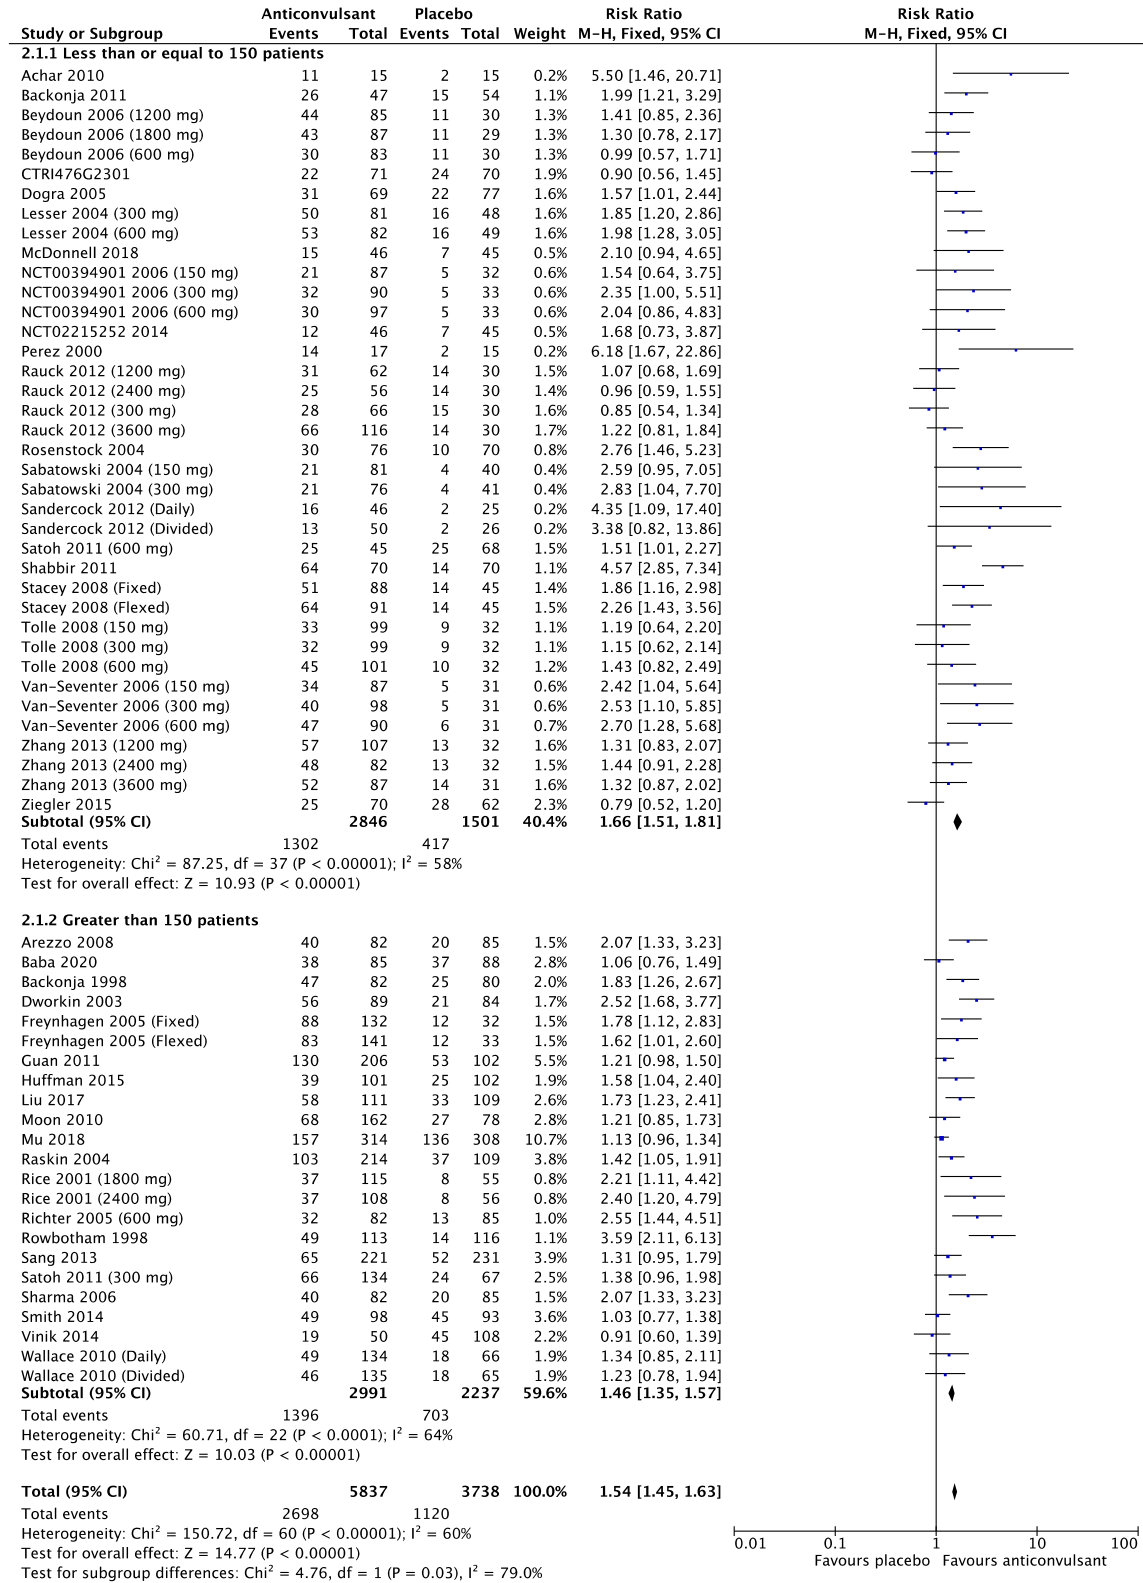

## Anticonvulsants (Gabapentin)

Figure 3.1: Gabapentin versus control; Outcome: Proportion of patients with a meaningful response to treatment at 4 weeks or less, 4 weeks to 12 weeks, and 12 weeks or greater

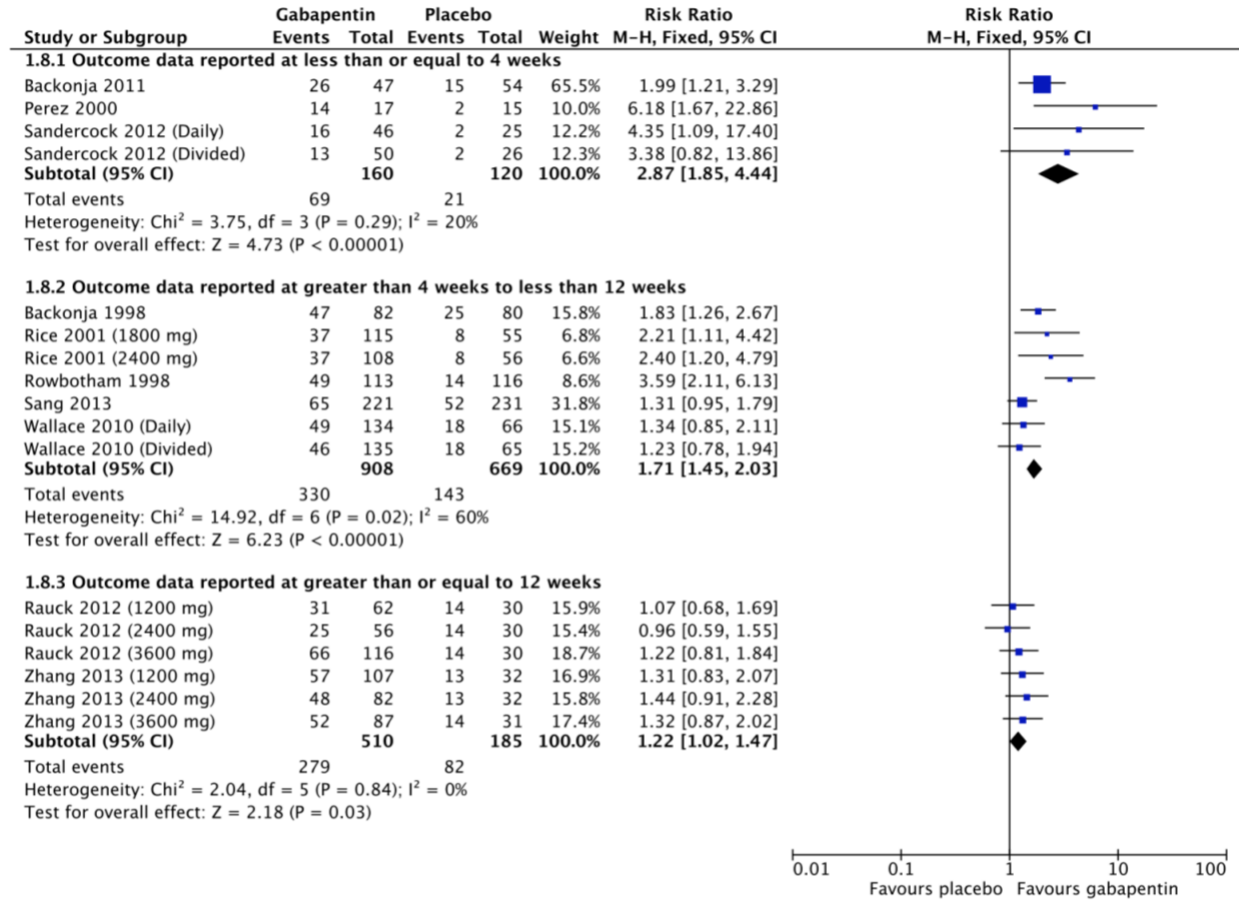

Figure 3.2: Gabapentin versus control; Subgroup analysis: Proportion of patients with a meaningful response to treatment, analyzed by study funding source

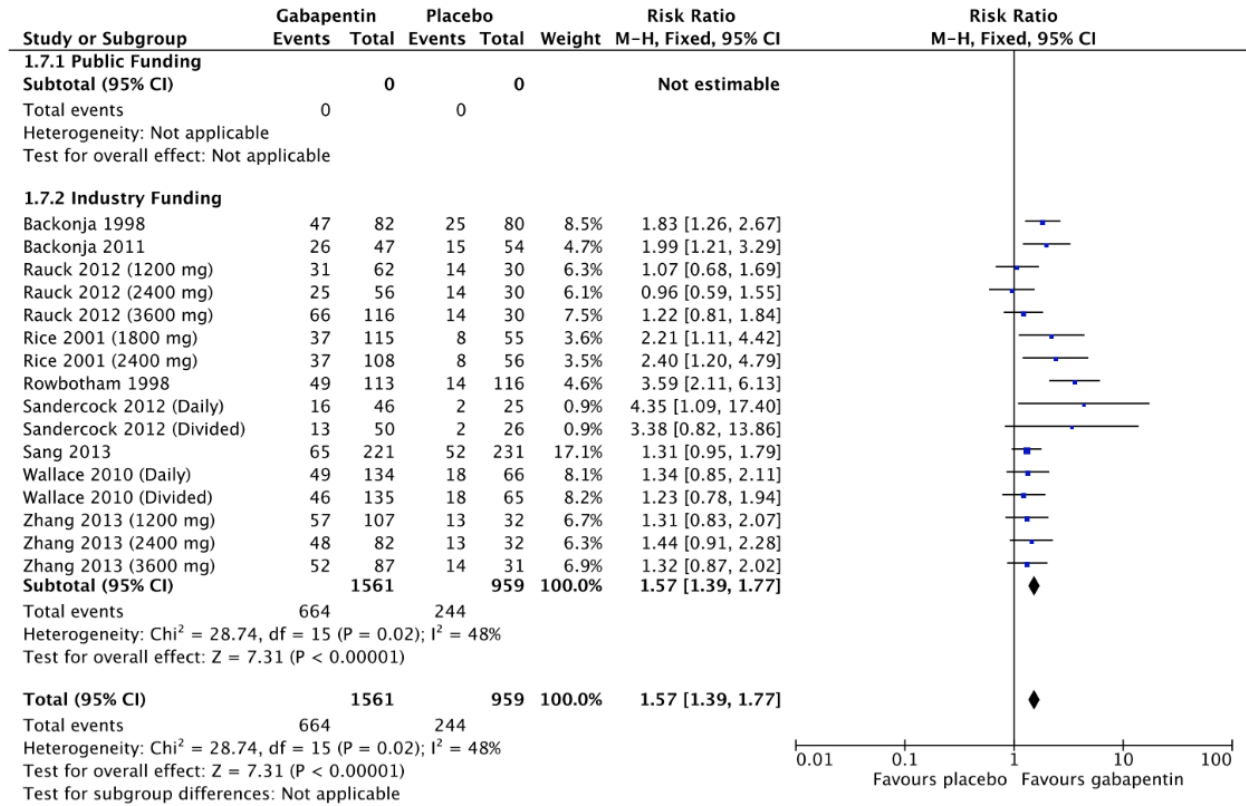



Figure 3.3: Gabapentin versus control; Subgroup analysis: Proportion of patients with a meaningful response to treatment, analyzed by neuropathic pain type

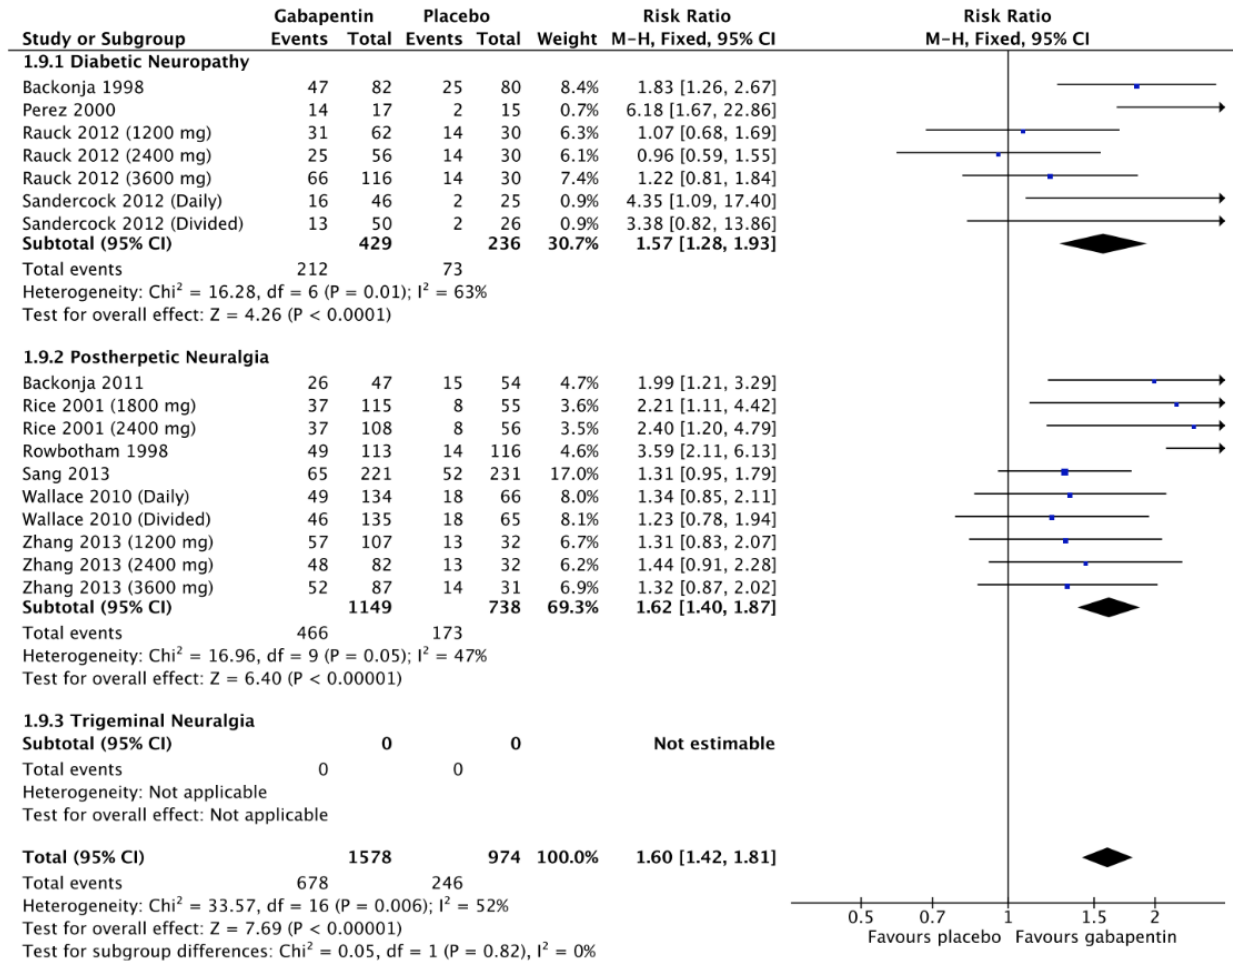

Figure 3.4: Gabapentin versus control; Subgroup analysis: Proportion of patients with a meaningful response to treatment, analyzed by sample size

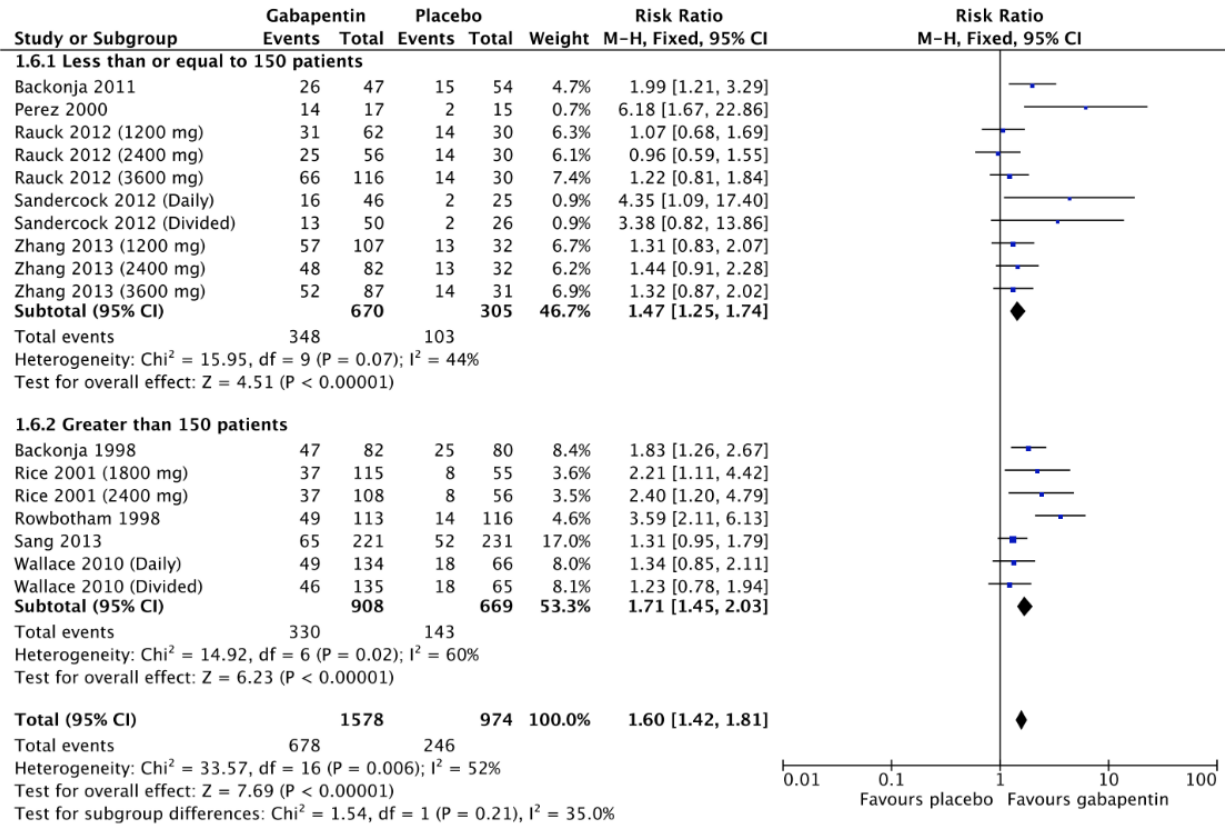

## Anticonvulsants (Oxcarbazepine)

Figure 4.1: Oxcarbazepine versus control; Outcome: Proportion of patients with a meaningful response to treatment at 4 weeks or less, 4 weeks to 12 weeks, and 12 weeks or greater

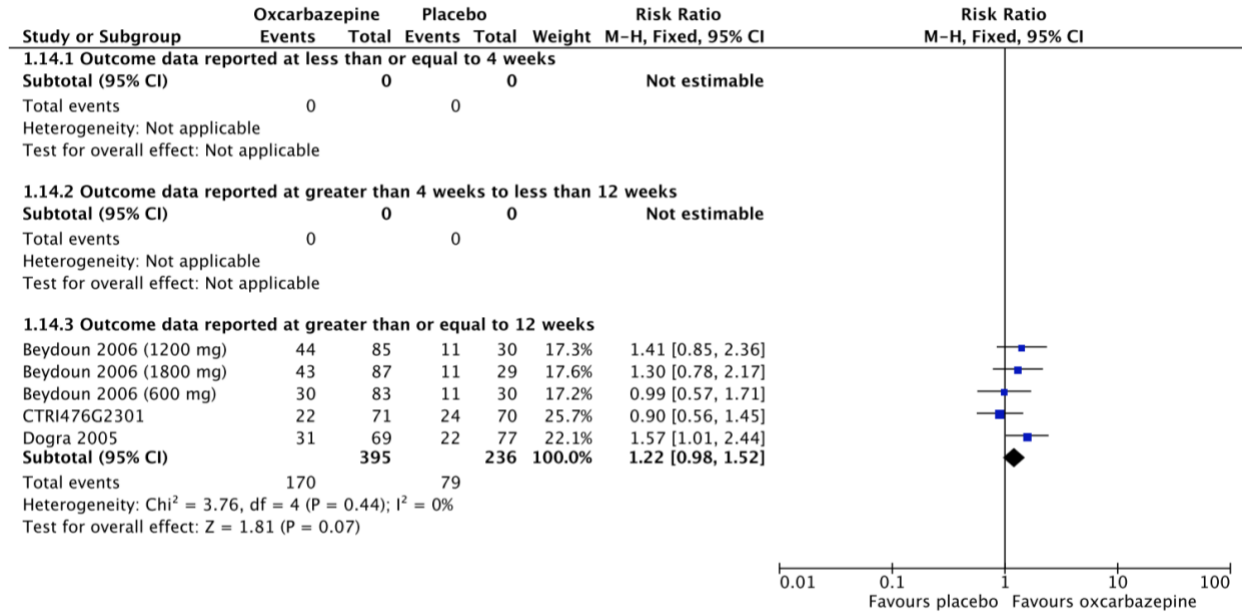

Figure 4.2: Oxcarbazepine versus control; Subgroup analysis: Proportion of patients with a meaningful response to treatment, analyzed by study funding source

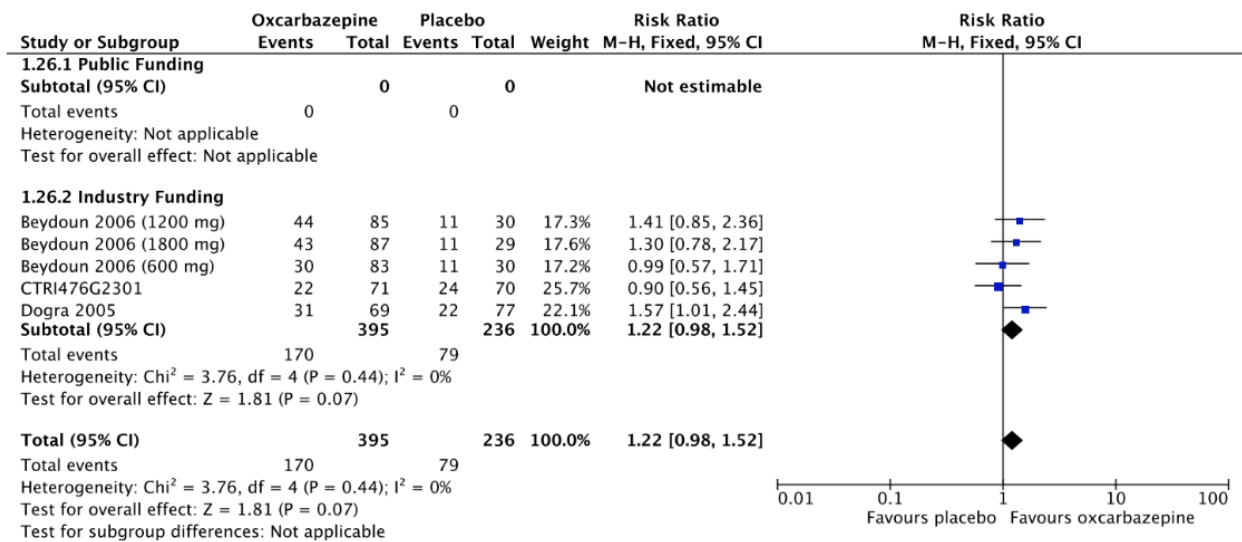

Figure 4.3: Oxcarbazepine versus control; Subgroup analysis: Proportion of patients with a meaningful response to treatment, analyzed by neuropathic pain type

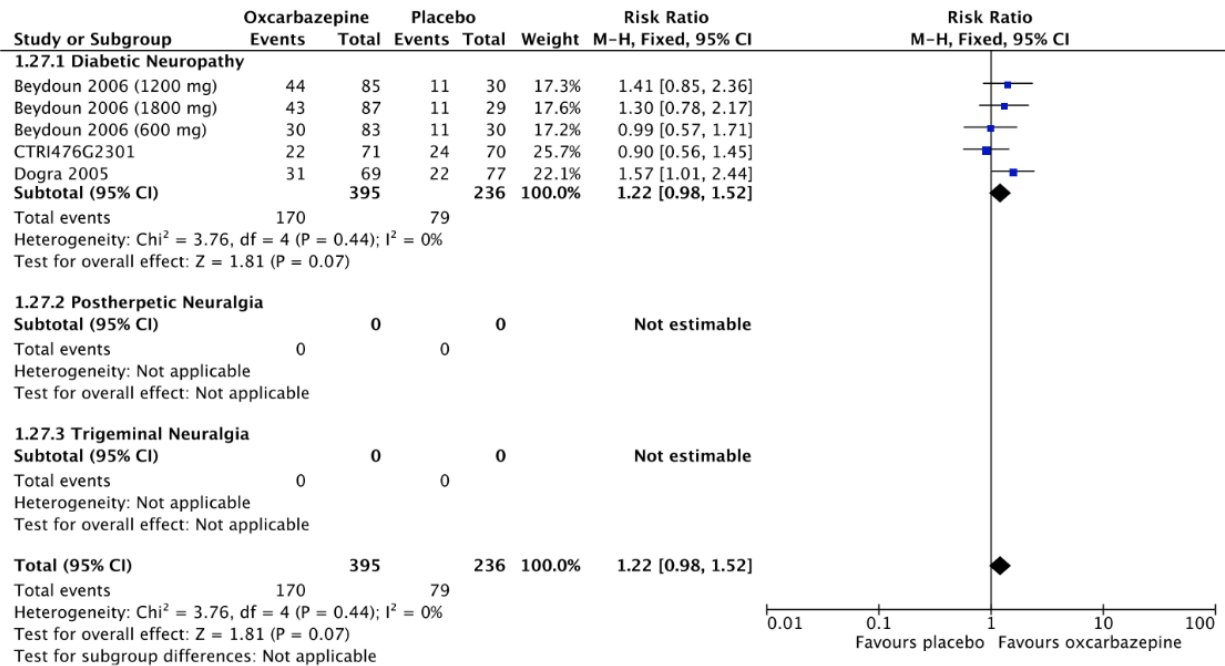

Figure 4.4: Oxcarbazepine versus control; Subgroup analysis: Proportion of patients with a meaningful response to treatment, analyzed by sample size

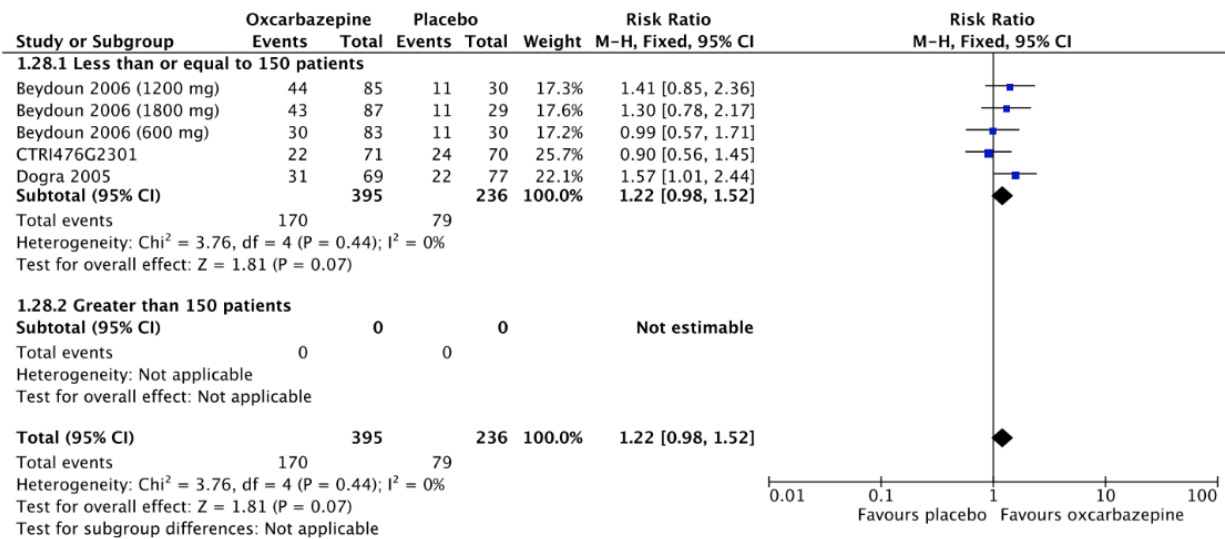

## Anticonvulsants (Pregabalin)

Figure 5.1: Pregabalin versus control; Outcome: Proportion of patients with a meaningful response to treatment at 4 weeks or less, 4 weeks to 12 weeks, and 12 weeks or greater

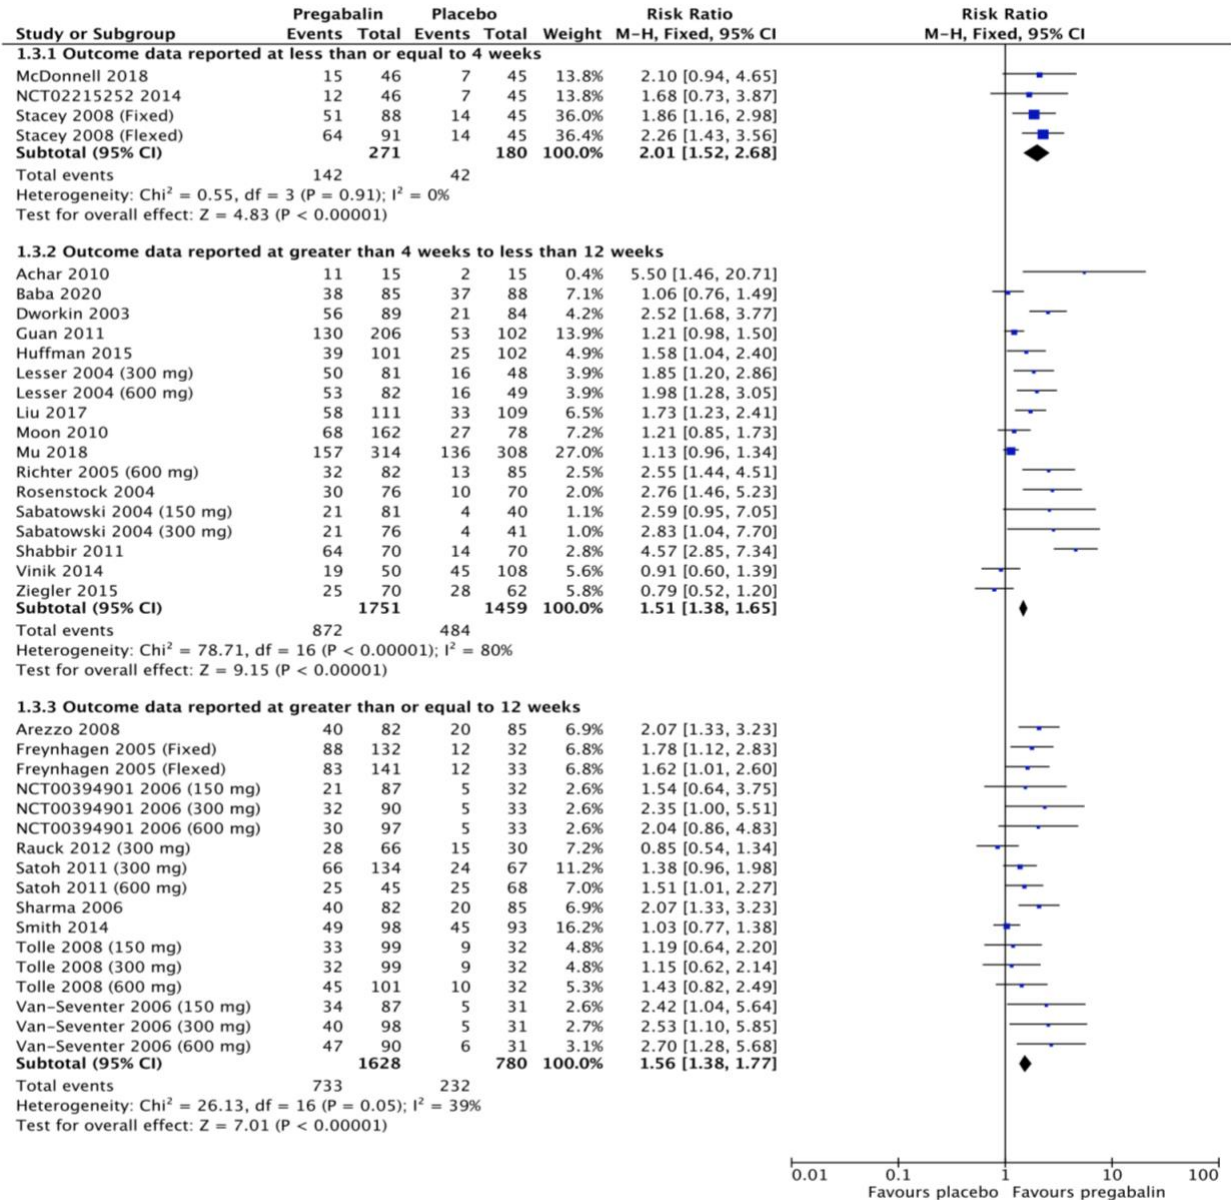

Figure 5.2: Pregabalin versus control; Subgroup analysis: Proportion of patients with a meaningful response to treatment, analyzed by study funding source

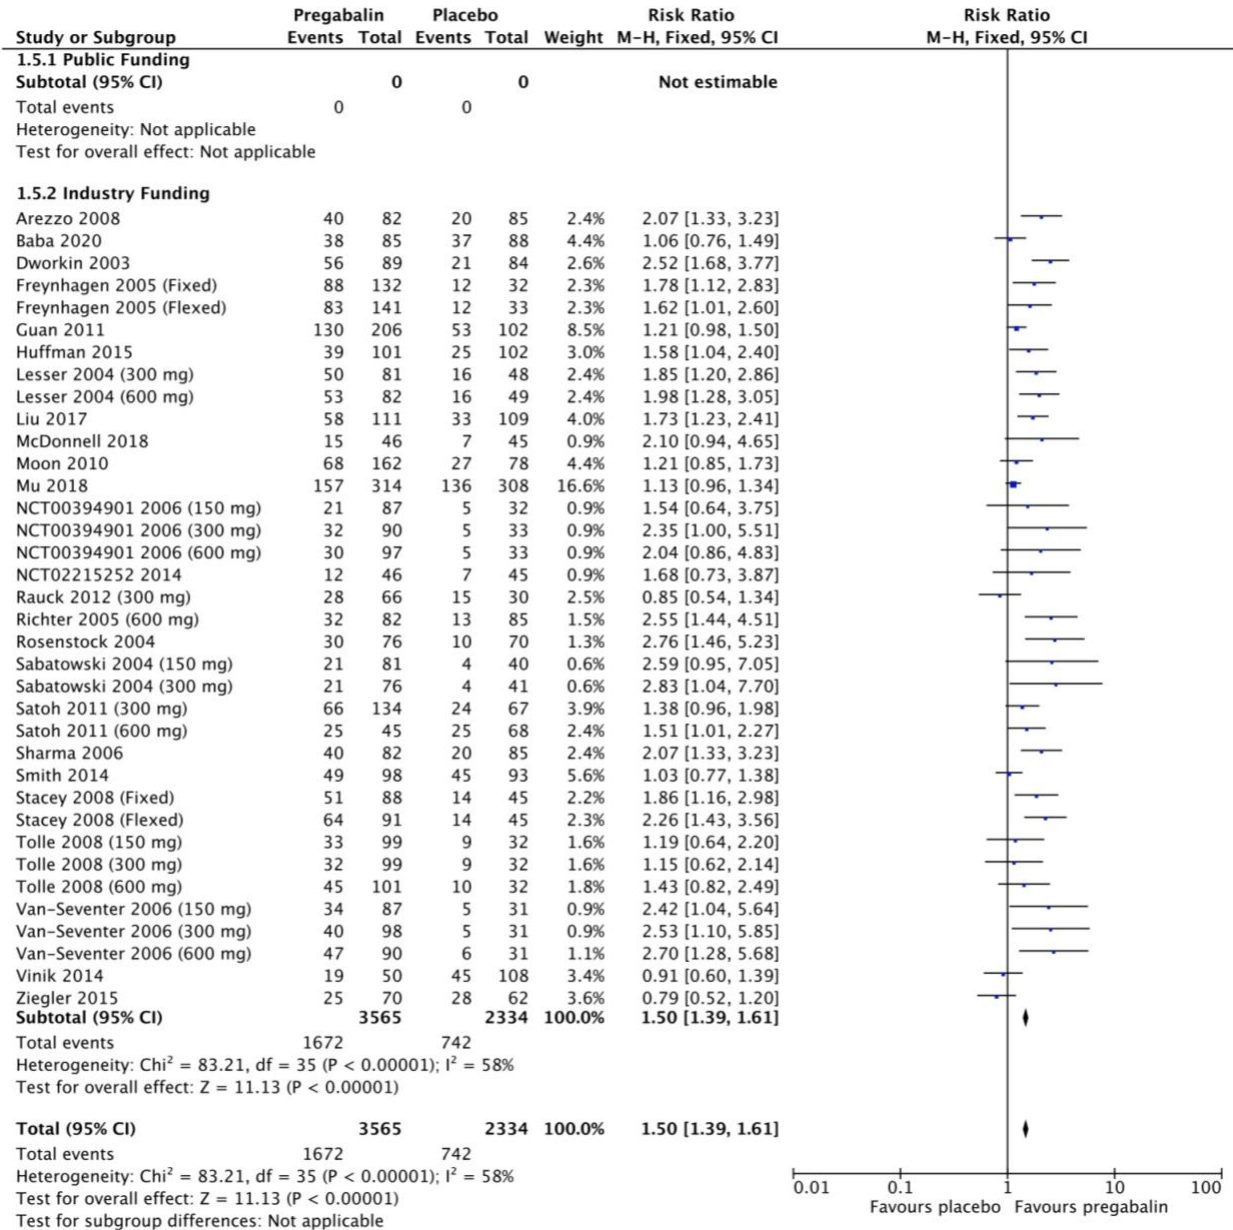

Figure 5.3: Pregabalin versus control; Subgroup analysis: Proportion of patients with a meaningful response to treatment, analyzed by neuropathic pain type

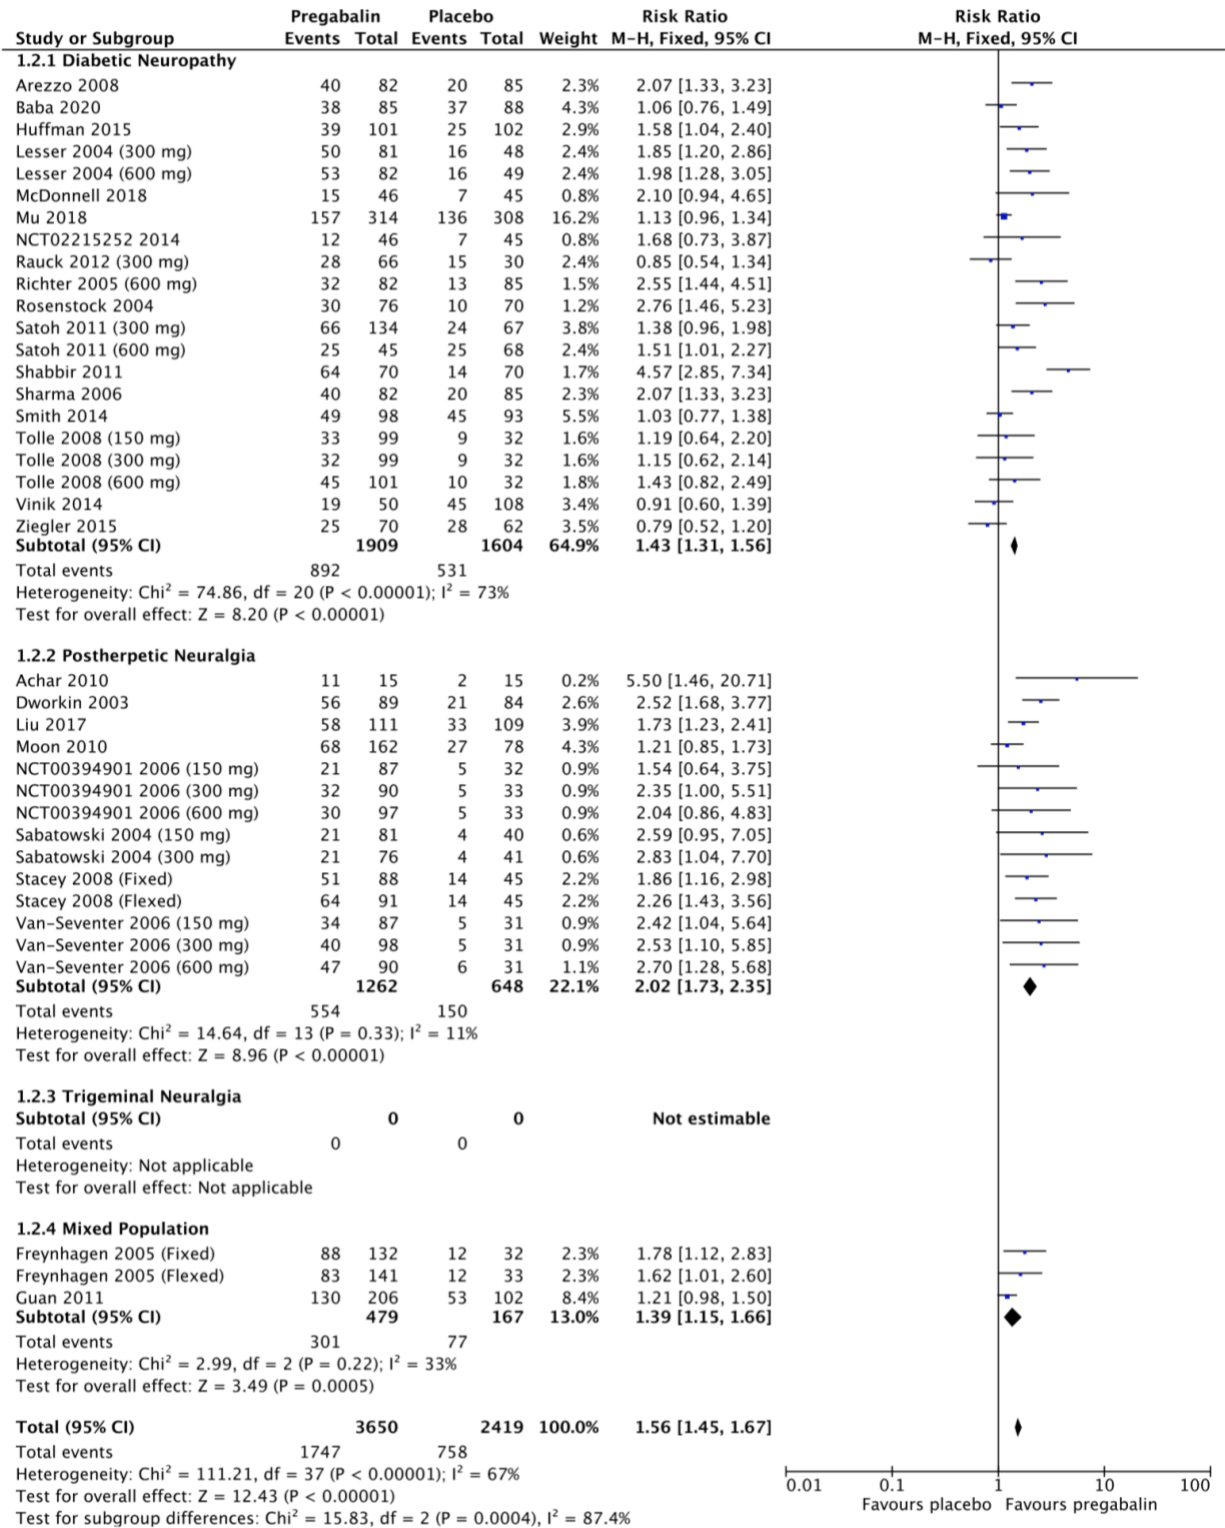

Figure 5.4: Pregabalin versus control; Subgroup analysis: Proportion of patients with a meaningful response to treatment, analyzed by sample size

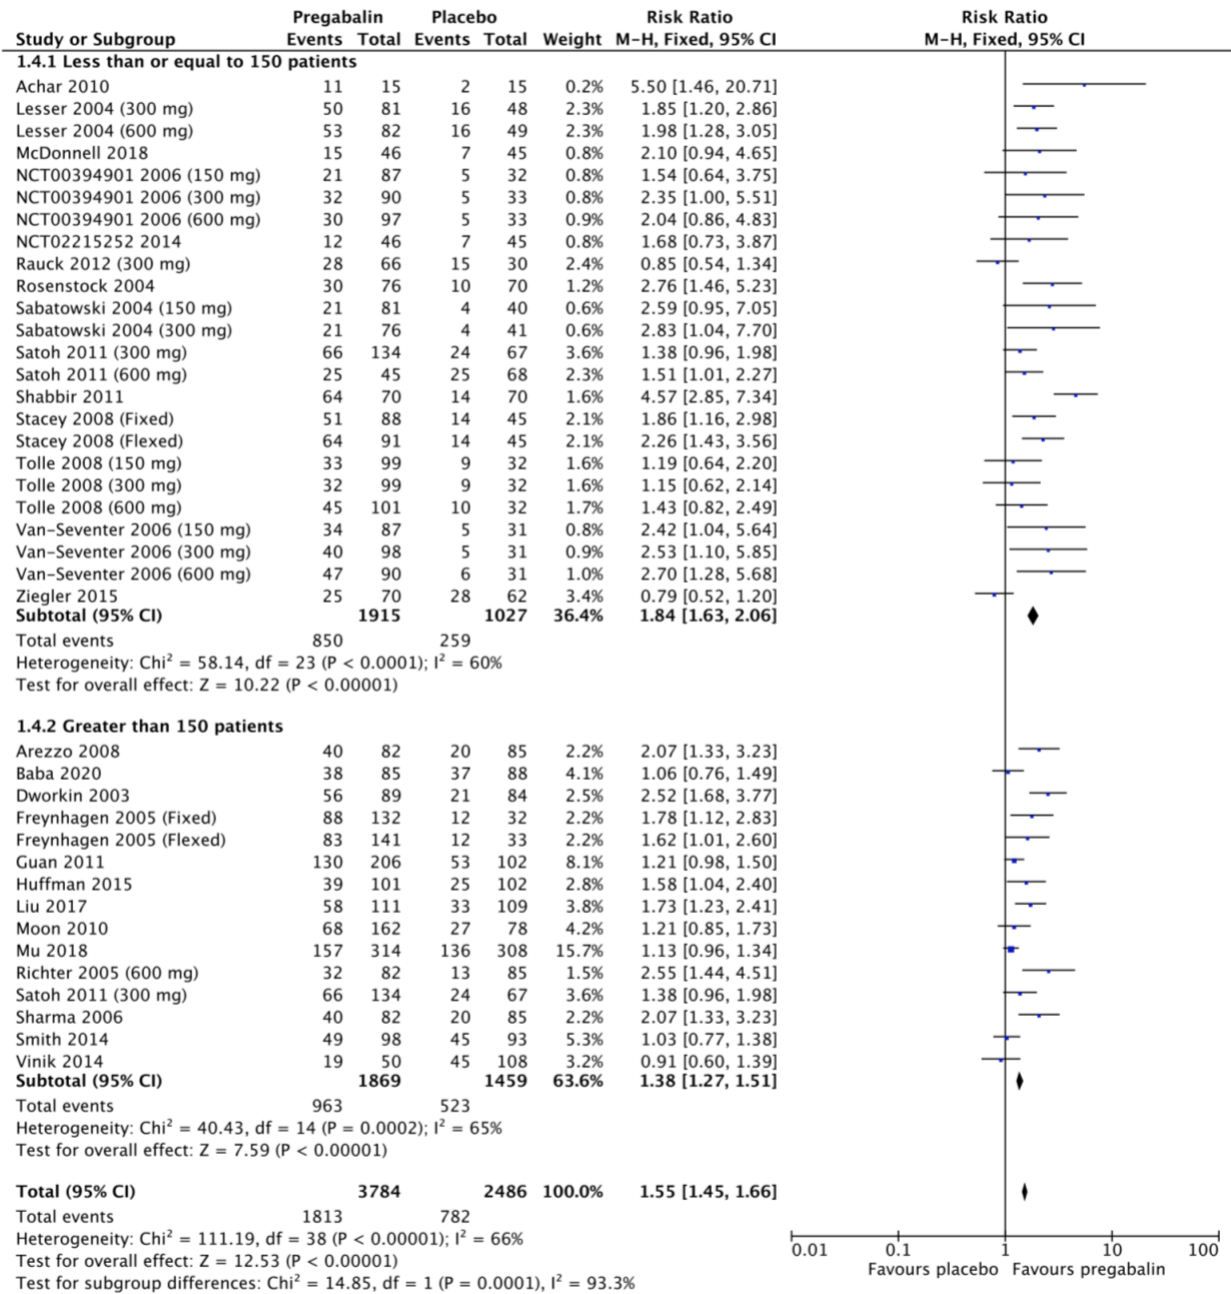



## Anticonvulsants (Topiramate)

Figure 6.1: Topiramate versus control; Outcome: Proportion of patients with a meaningful response to treatment at 4 weeks or less, 4 weeks to 12 weeks, and 12 weeks or greater

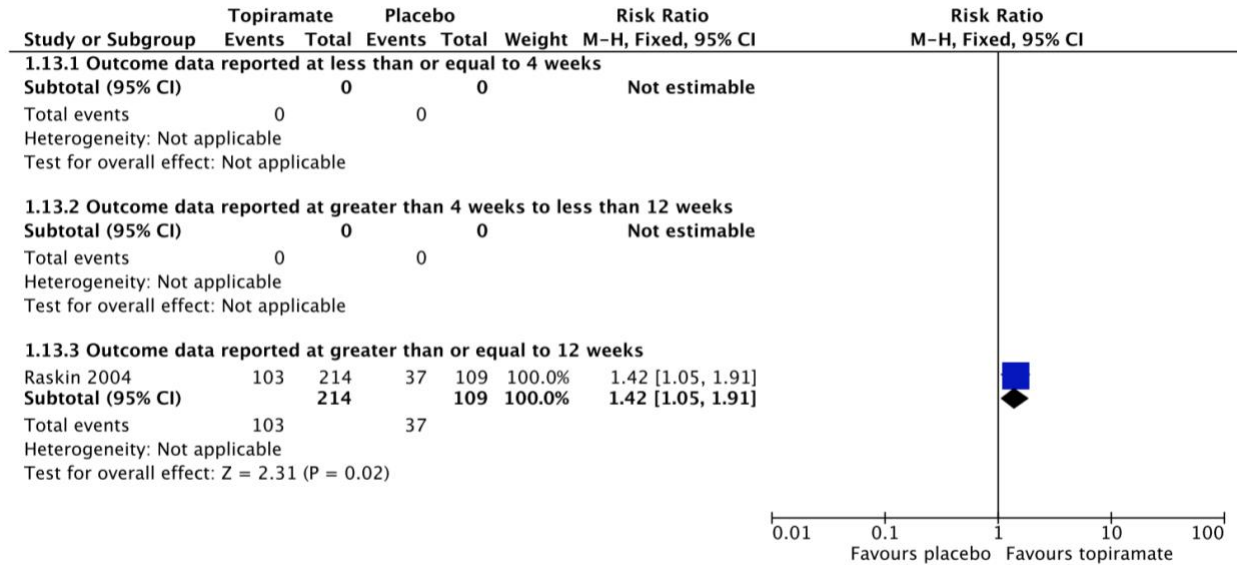

Figure 6.2: Topiramate versus control; Subgroup analysis: Proportion of patients with a meaningful response to treatment, analyzed by study funding source

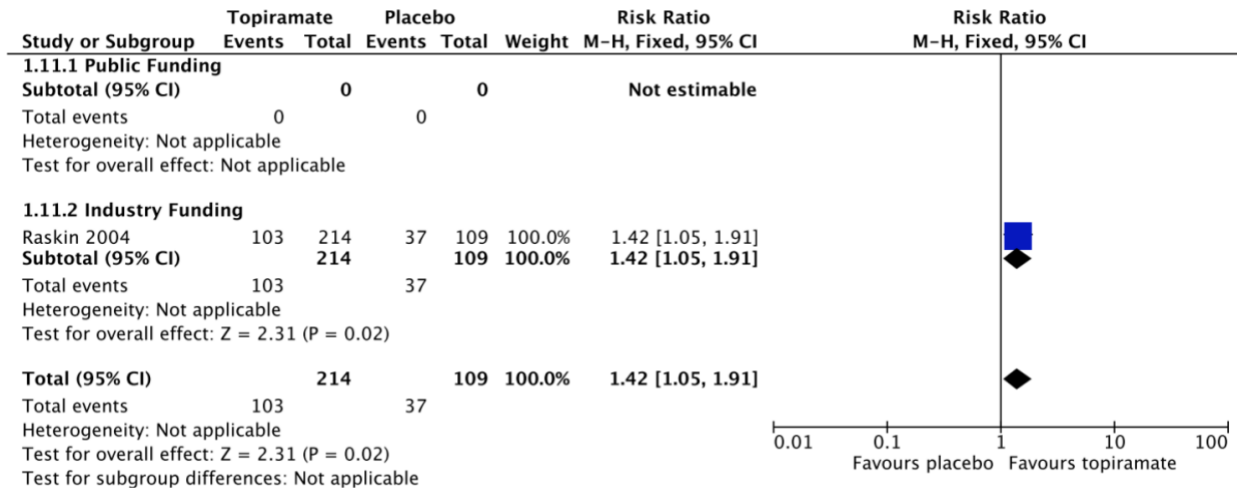

Figure 6.3: Topiramate versus control; Subgroup analysis: Proportion of patients with a meaningful response to treatment, analyzed by neuropathic pain type

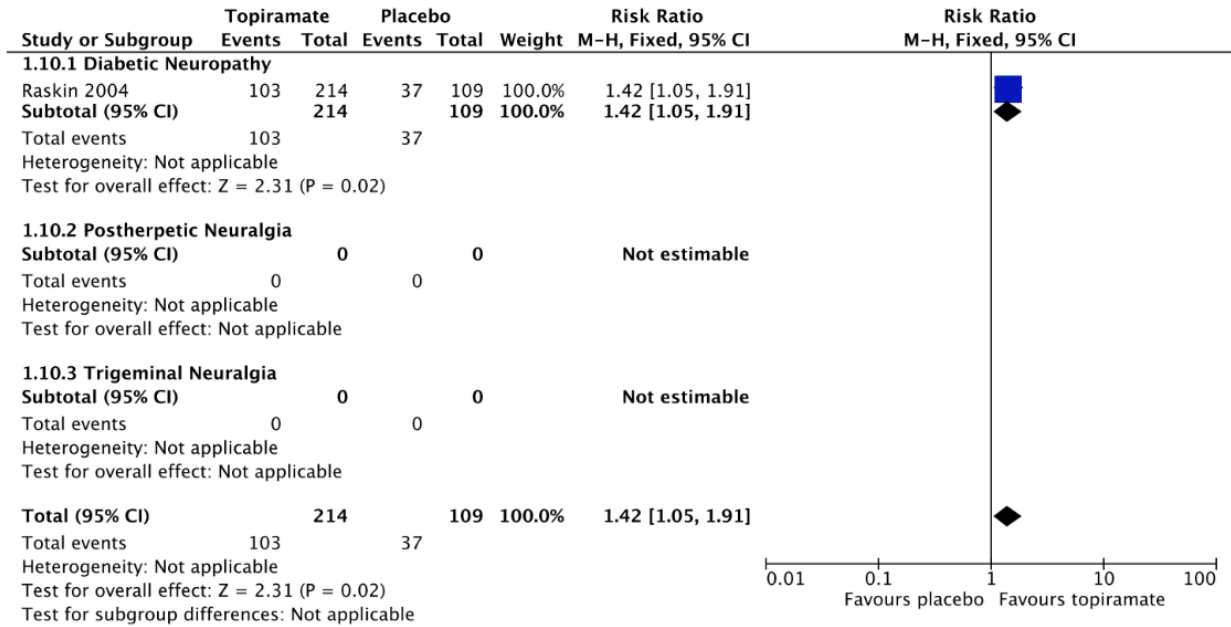

Figure 6.4: Topiramate versus control; Subgroup analysis: Proportion of patients with a meaningful response to treatment, analyzed by sample size

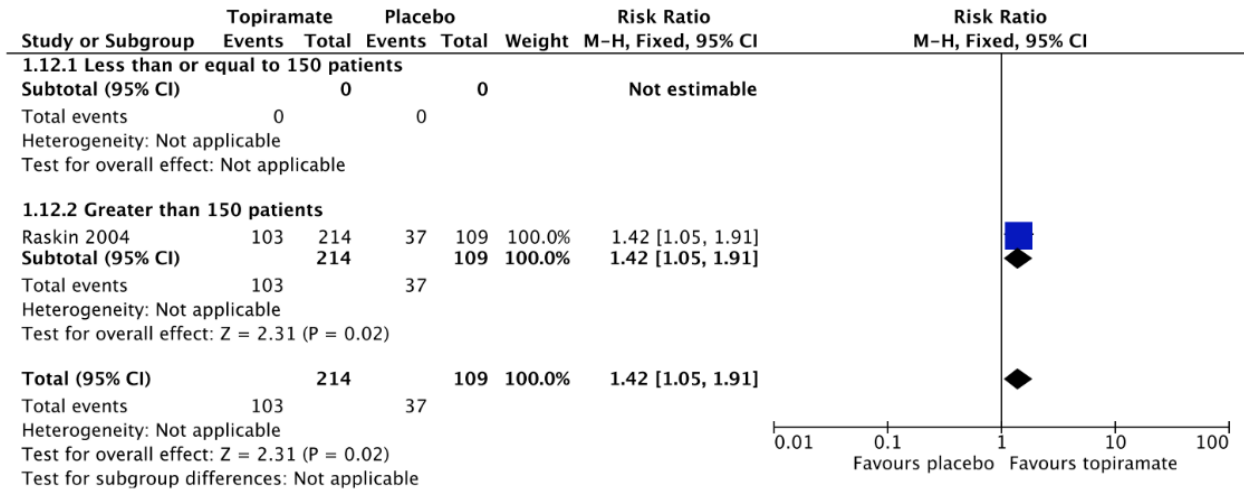

## Opioids

Figure 7.1: Opioids versus control; Outcome: Proportion of patients with a meaningful response to treatment

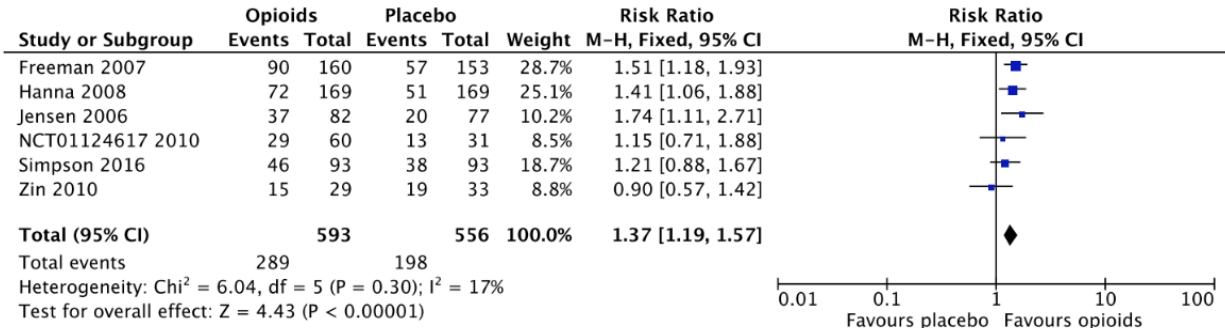

Figure 7.2: Opioids versus control; Outcome: Proportion of patients with a meaningful response to treatment at 4 weeks or less, 4 weeks to 12 weeks, and 12 weeks or greater

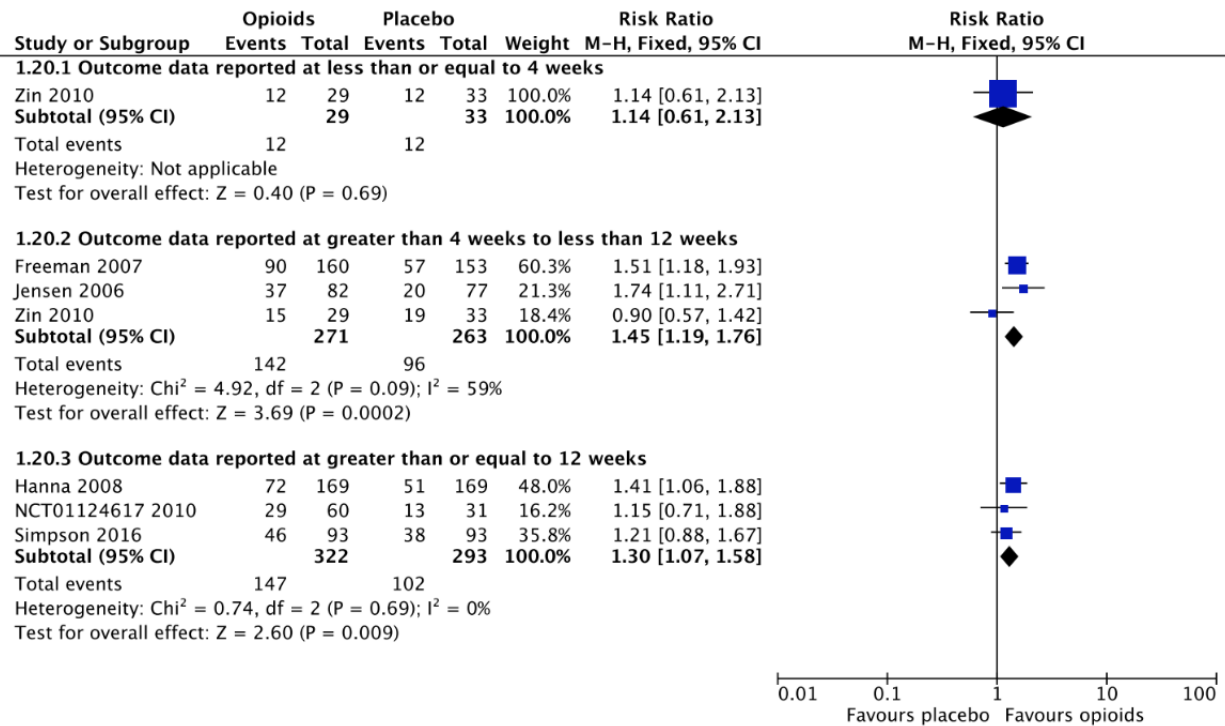

Figure 7.3: Opioids versus control; Subgroup analysis: Proportion of patients with a meaningful response to treatment, analyzed by study funding source

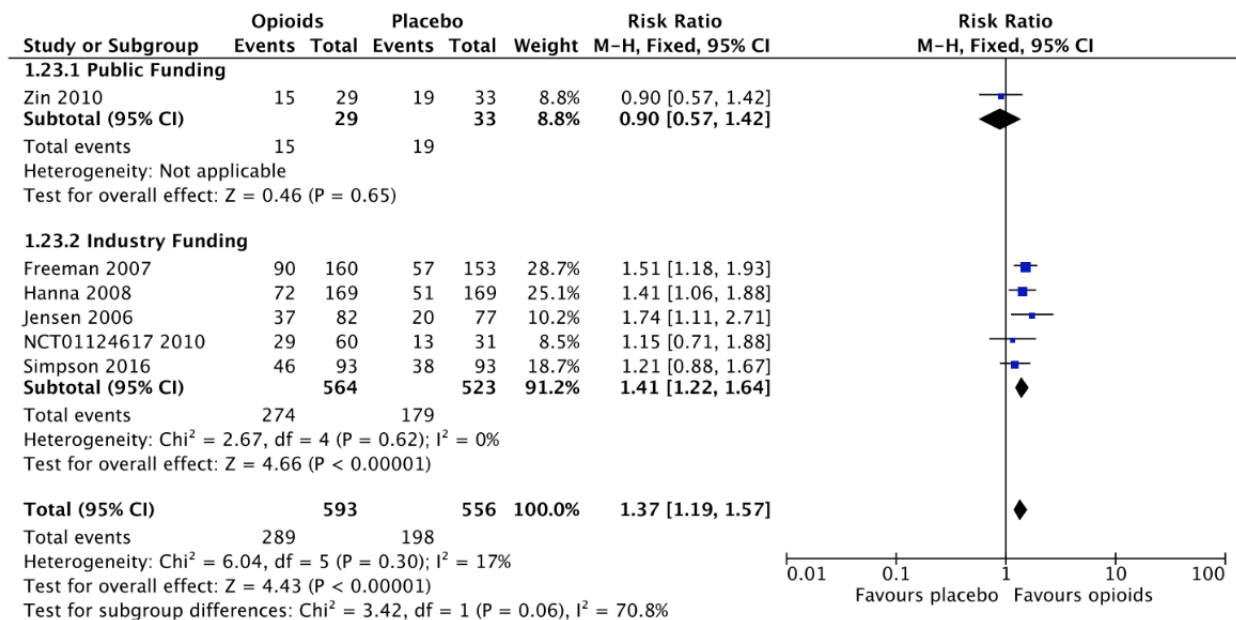

Figure 7.4: Opioids versus control; Subgroup analysis: Proportion of patients with a meaningful response to treatment, analyzed by median risk of bias

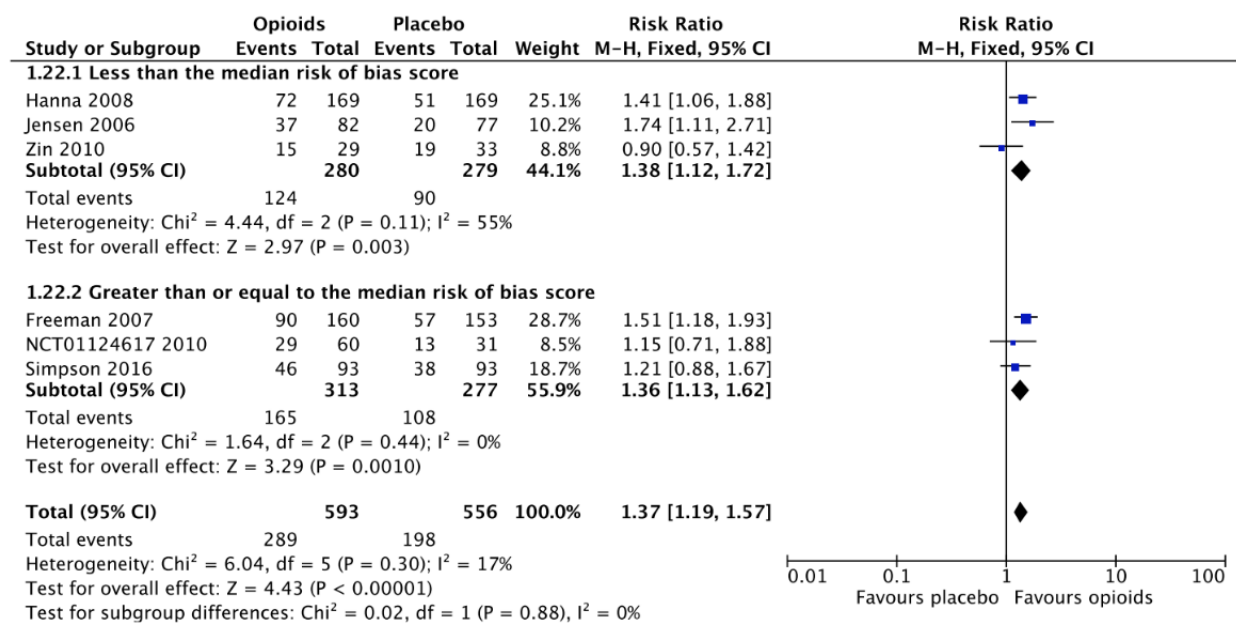

For each study, the risk of bias domain was scored (0=low risk, 1=unclear risk, 2=high risk) and a median was found among all the studies within each intervention. Studies were then divided into two categories: less than the median or greater than or equal to the median. (Higgins 2011)

Figure 7.5: Opioids versus control; Subgroup analysis: Proportion of patients with a meaningful response to treatment, analyzed by neuropathic pain type

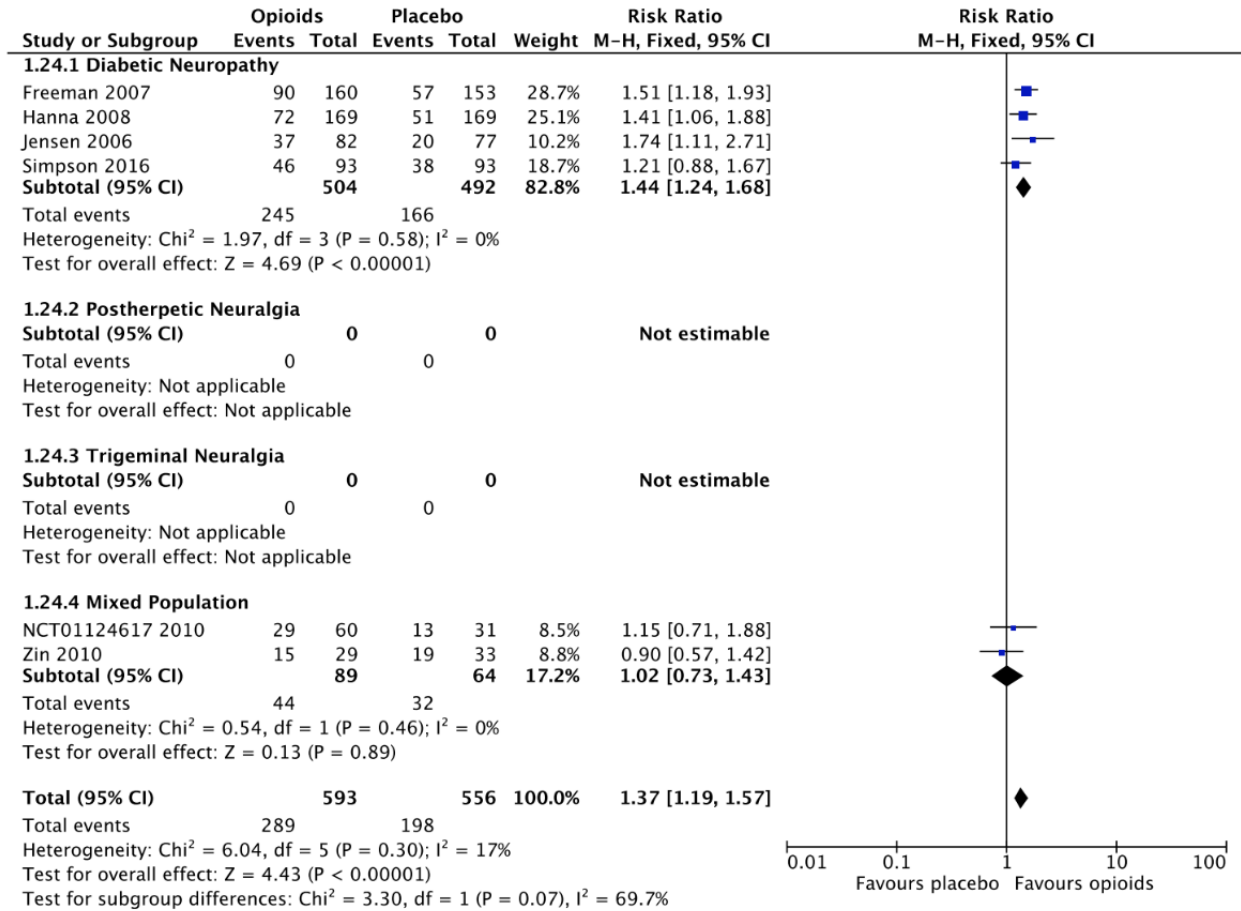

Figure 7.6: Opioids versus control; Subgroup analysis: Proportion of patients with a meaningful response to treatment, analyzed by sample size

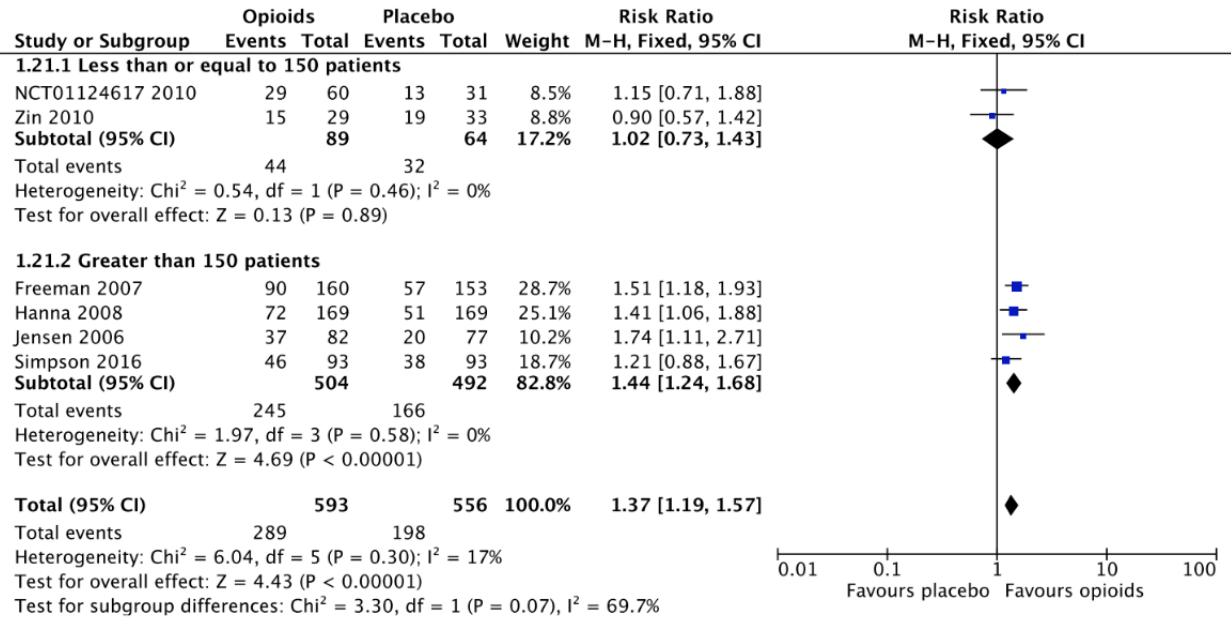

## Rubefacients (Capsaicin)

Figure 8.1: Rubefacients versus control; Outcome: Proportion of patients with a meaningful response to treatment

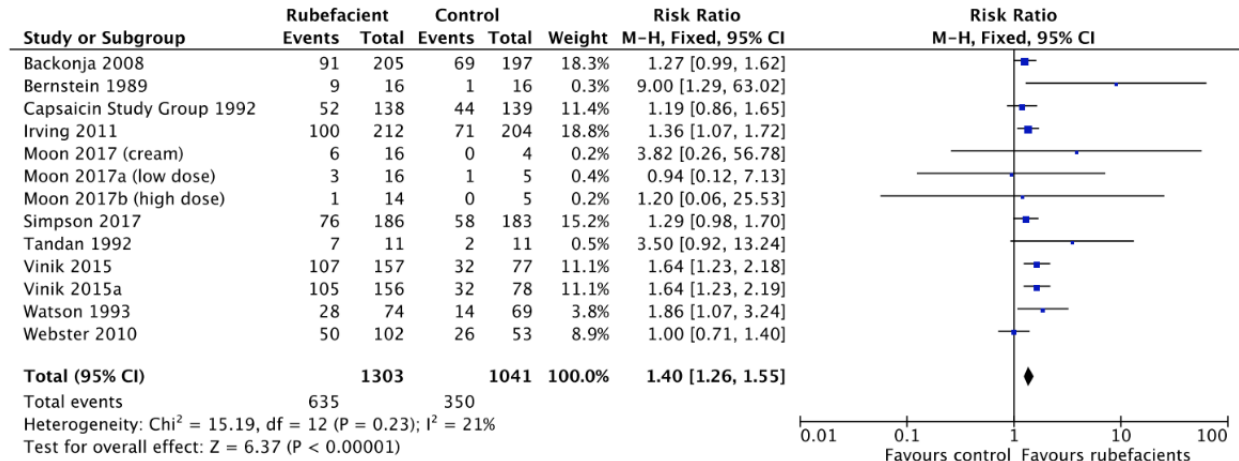

Figure 8.2: Rubefacients versus control; Outcome: Proportion of patients with a meaningful response to treatment at 4 weeks or less, 4 weeks to 12 weeks, and 12 weeks or greater

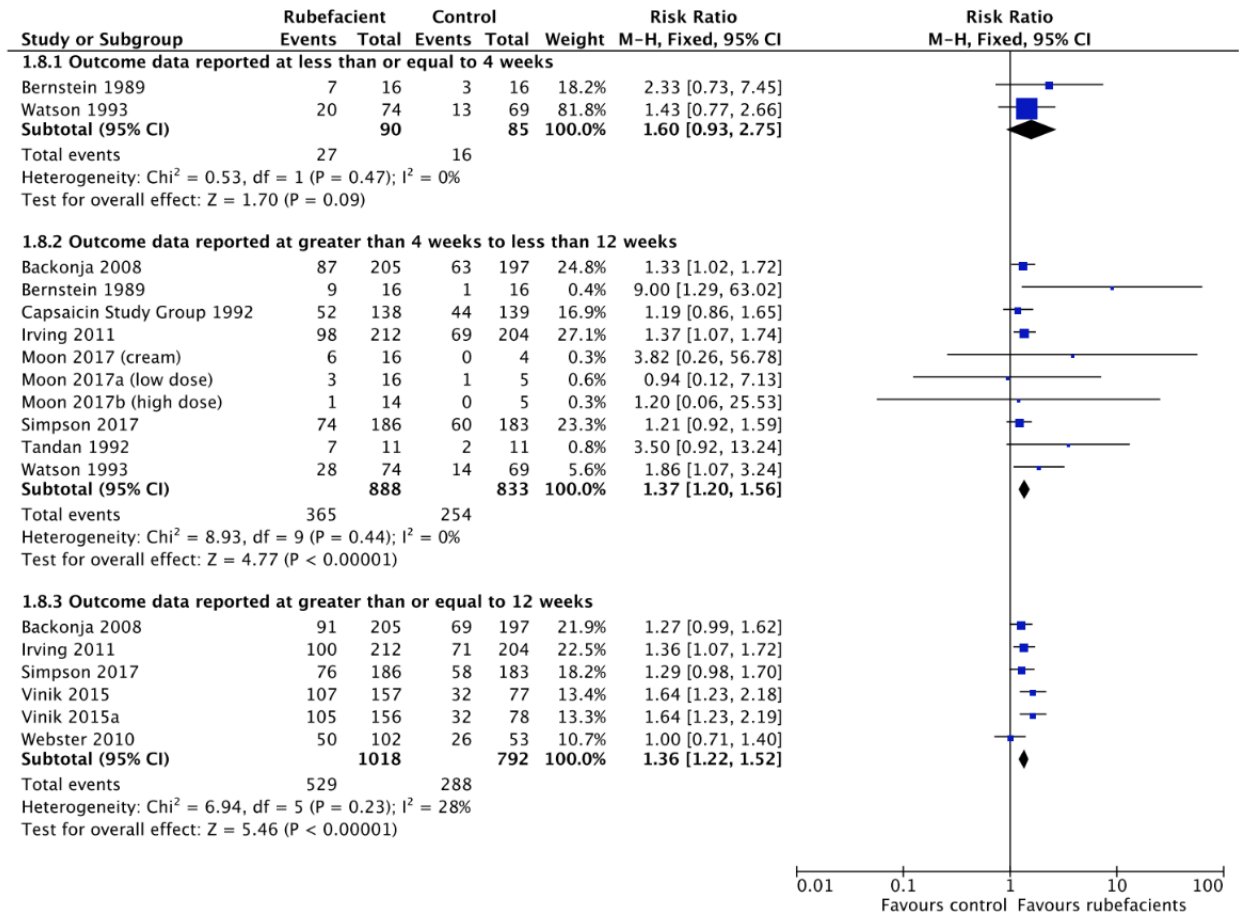

Figure 8.3: Rubefacients versus control; Subgroup analysis: Proportion of patients with a meaningful response to treatment, analyzed by study funding source

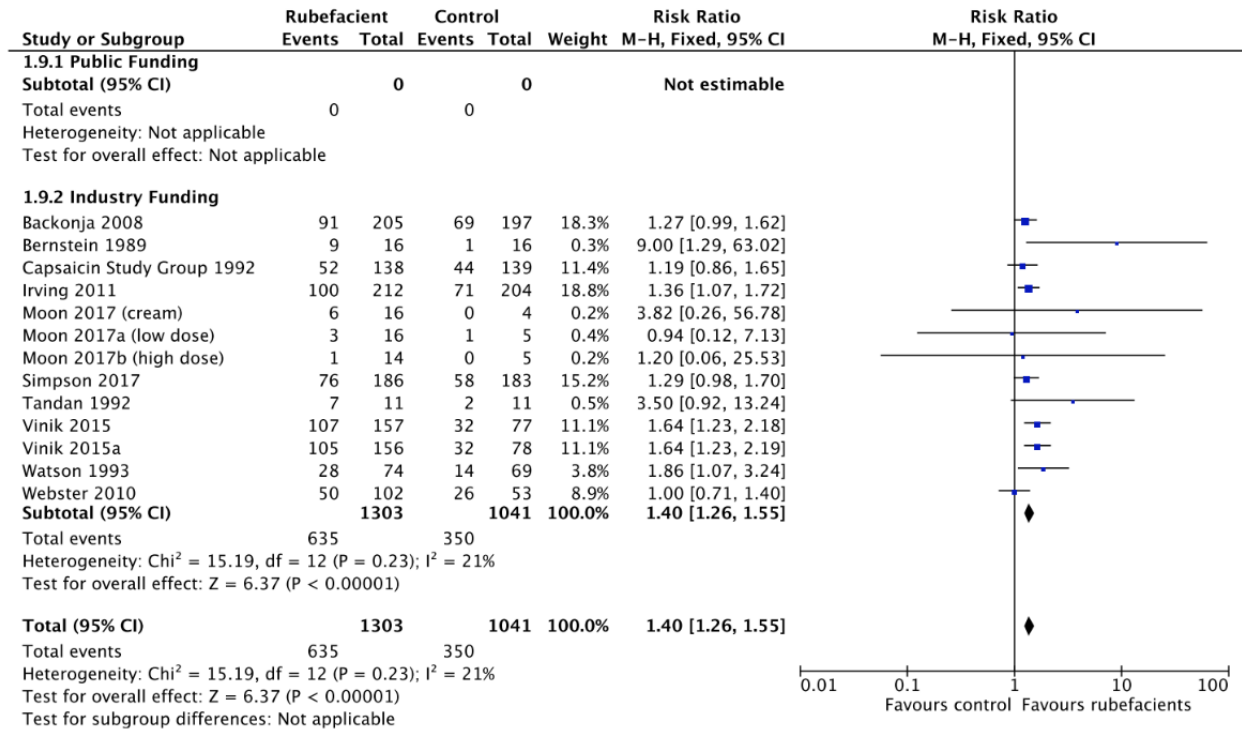

Figure 8.4: Rubefacients versus control; Subgroup analysis: Proportion of patients with a meaningful response to treatment, analyzed by median risk of bias

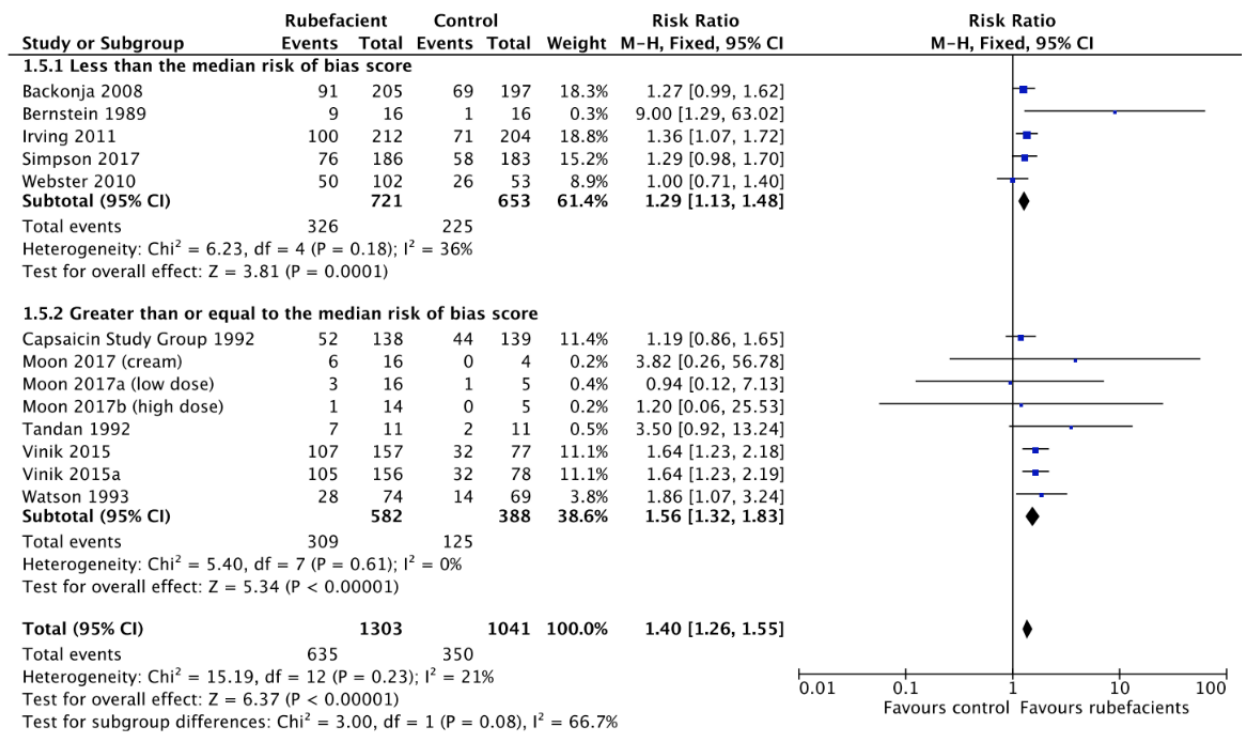

For each study, the risk of bias domain was scored (0=low risk, 1=unclear risk, 2=high risk) and a median was found



among all the studies within each intervention. Studies were then divided into two categories: less than the median or greater than or equal to the median. (Higgins 2011)

Figure 8.5: Rubefacients versus control; Subgroup analysis: Proportion of patients with a meaningful response to treatment, analyzed by neuropathic pain type

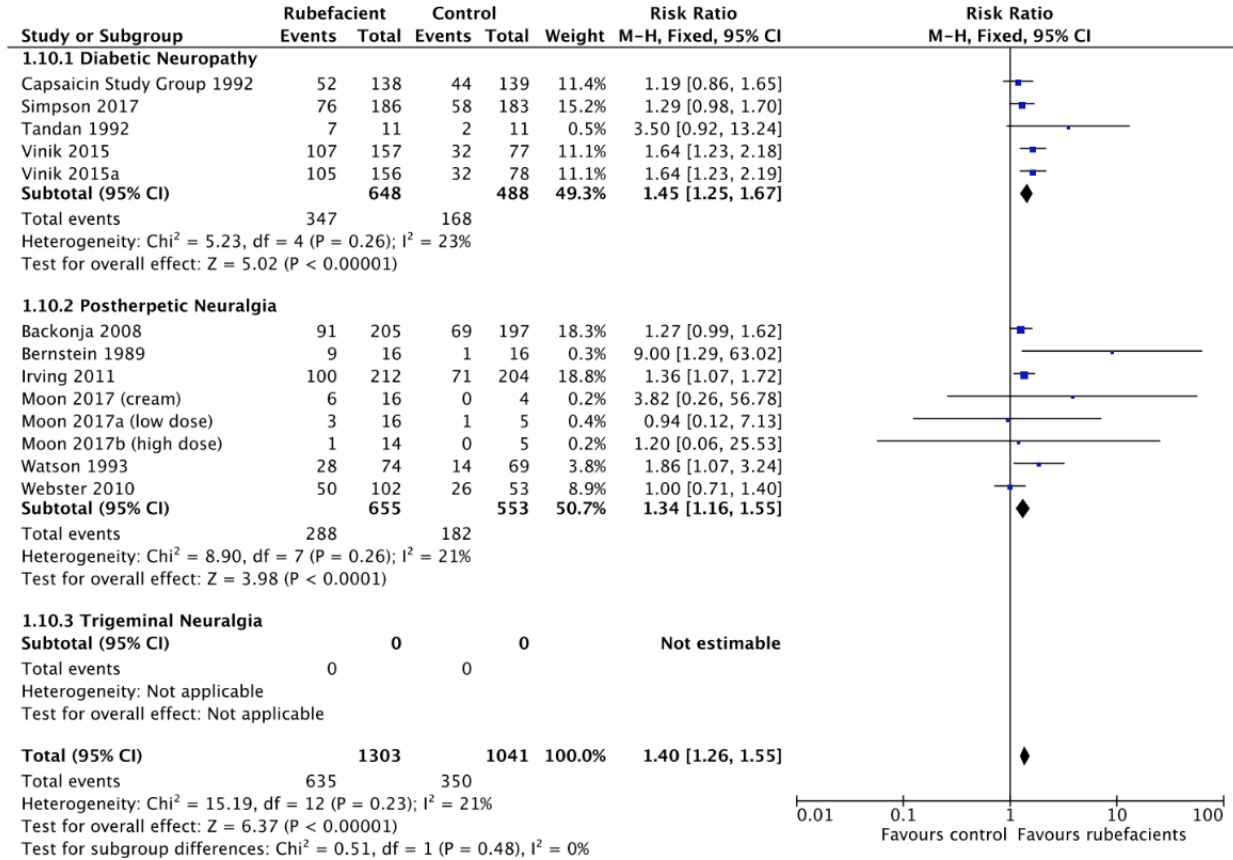

Figure 8.6: Rubefacients versus control; Subgroup analysis: Proportion of patients with a meaningful response to treatment, analyzed by drug type

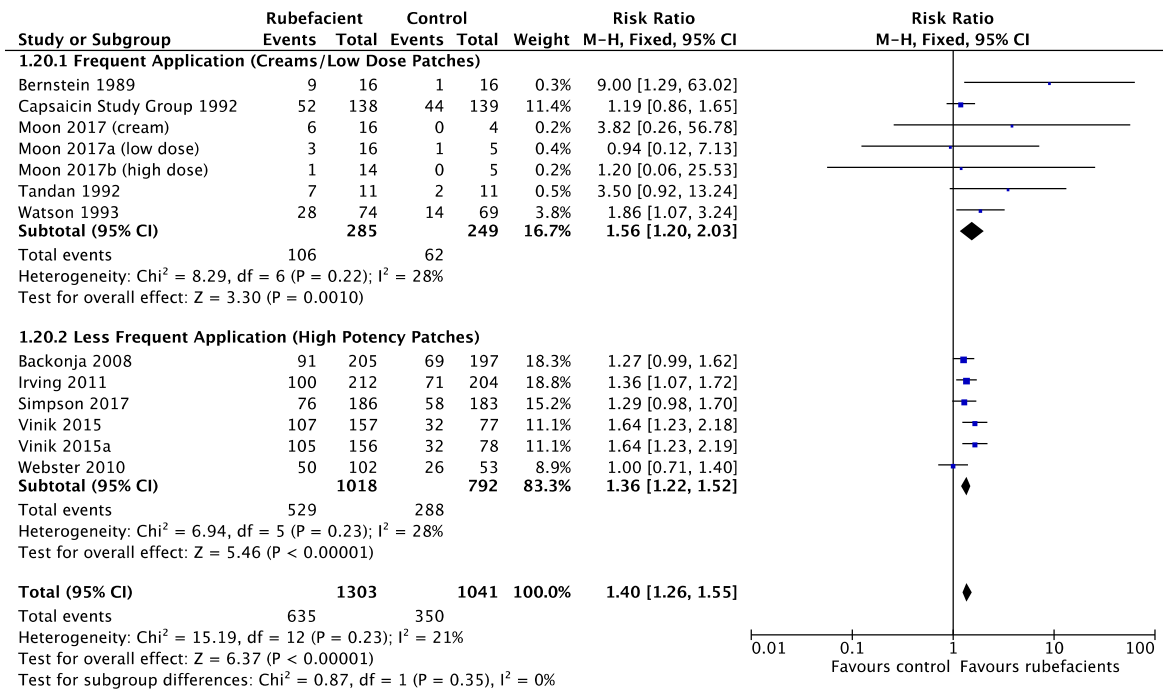

Figure 8.7: Rubefacients versus control; Subgroup analysis: Proportion of patients with a meaningful response to treatment, analyzed by sample size

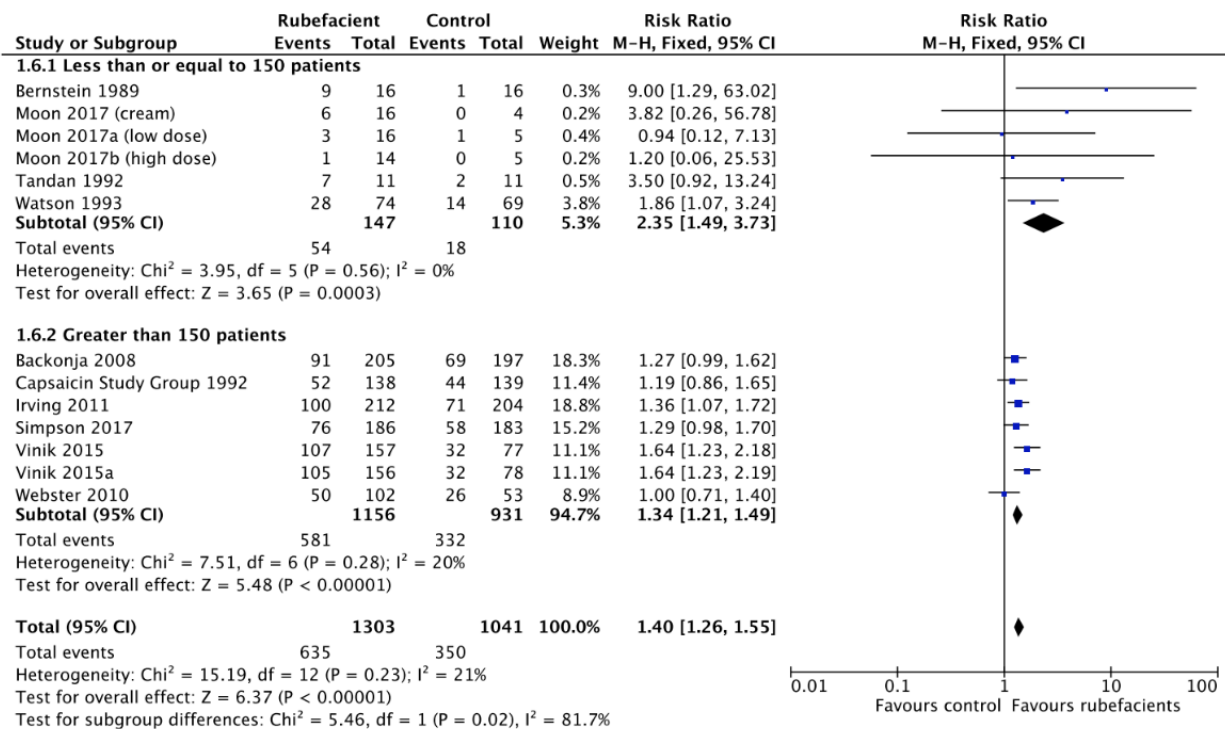

## SNRIs

Figure 9.1: SNRIs versus control; Outcome: Proportion of patients with a meaningful response to treatment.

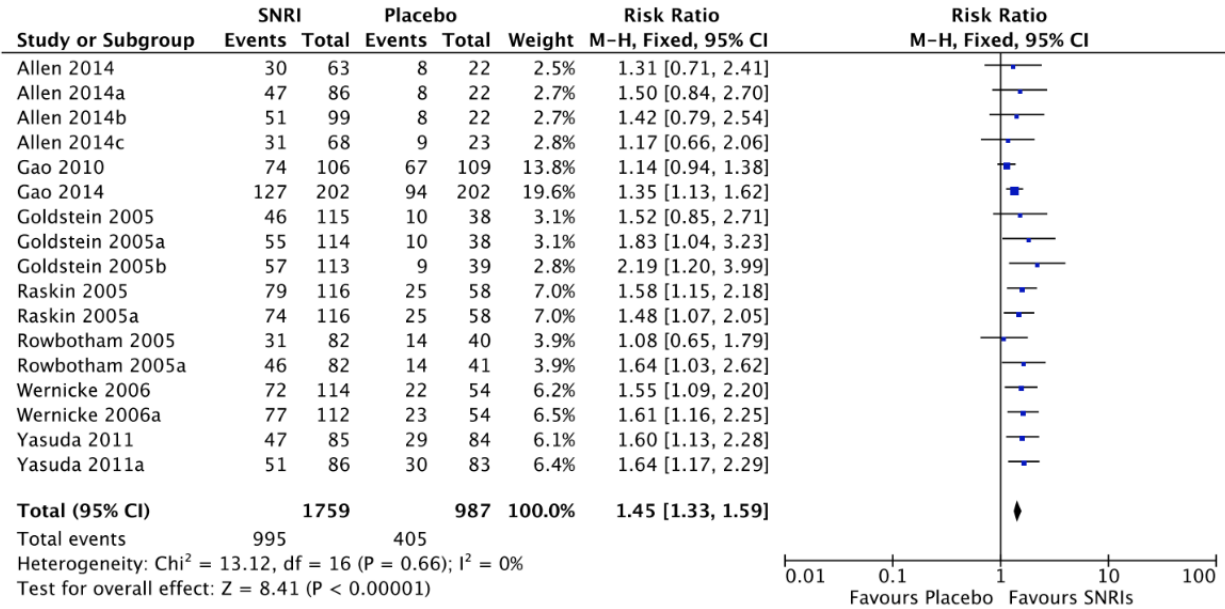

Figure 9.2: SNRIs versus control; Outcome: Proportion of patients with a meaningful response to treatment at 4 weeks or less, 4 weeks to 12 weeks, and 12 weeks or greater

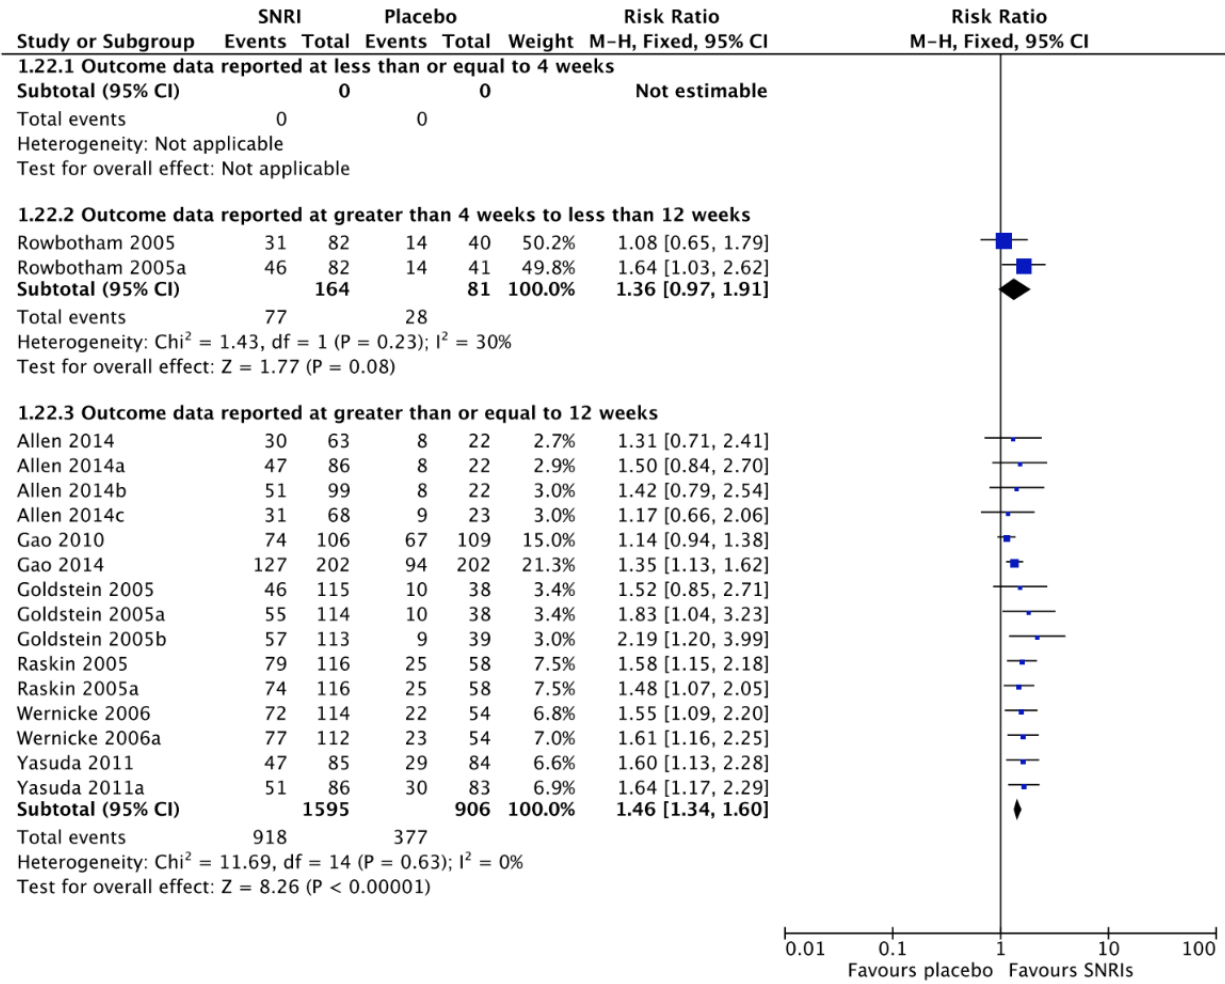

Figure 9.3: SNRIs versus control; Subgroup analysis: Proportion of patients with a meaningful response to treatment, analyzed by study funding source

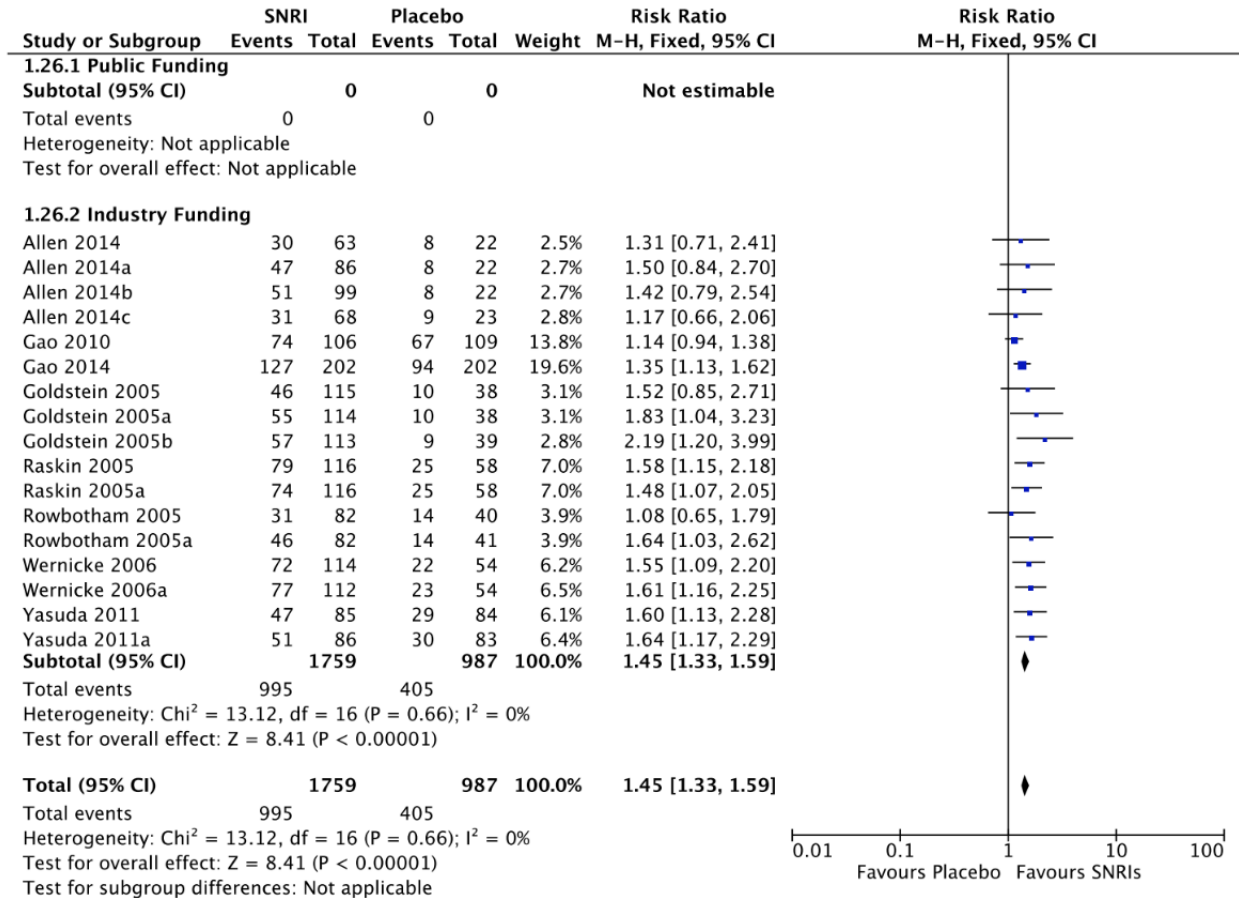

Figure 9.4: SNRIs versus control; Subgroup analysis: Proportion of patients with a meaningful response to treatment, analyzed by median risk of bias

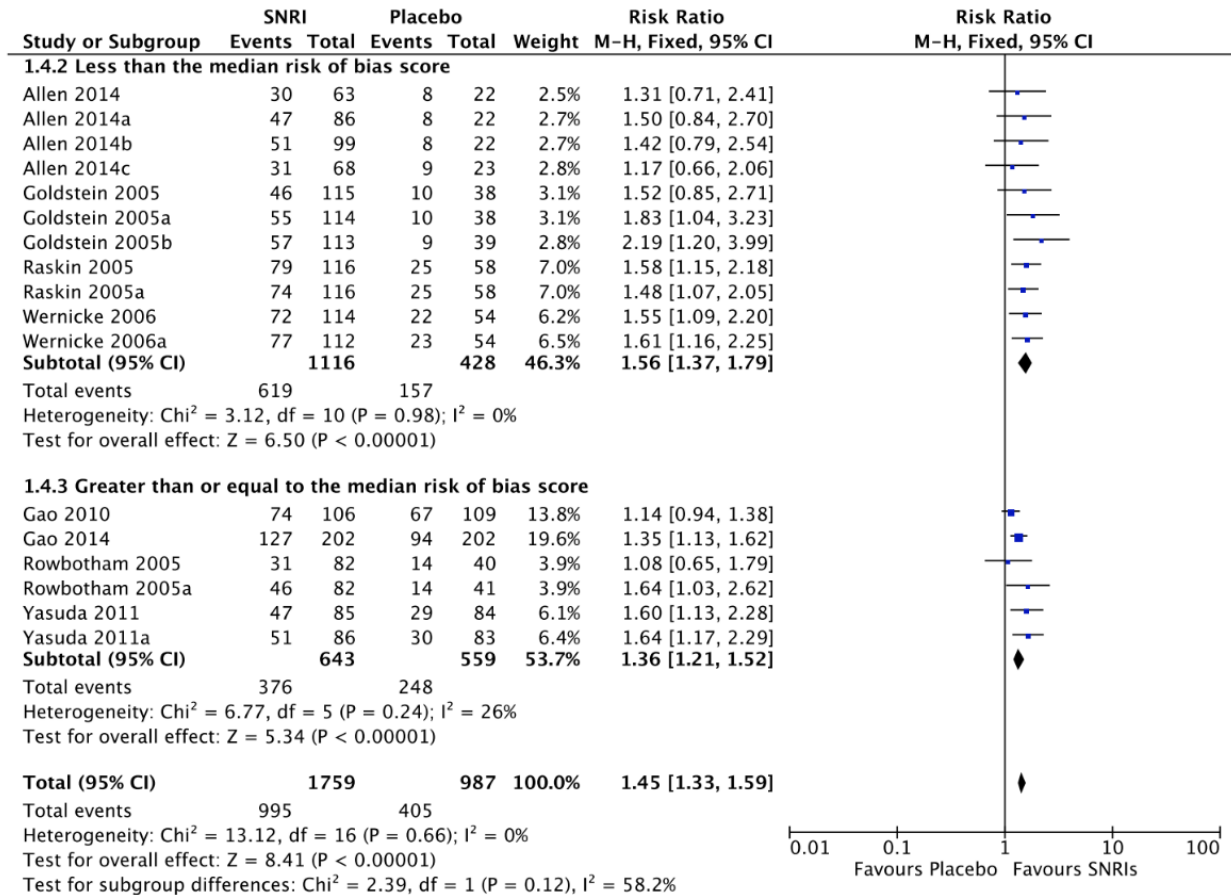

For each study, the risk of bias domain was scored (0=low risk, 1=unclear risk, 2=high risk) and a median was found among all the studies within each intervention. Studies were then divided into two categories: less than the median or greater than or equal to the median. (Higgins 2011)

Figure 9.5: SNRIs versus control; Subgroup analysis: Proportion of patients with a meaningful response to treatment, analyzed by neuropathic pain type

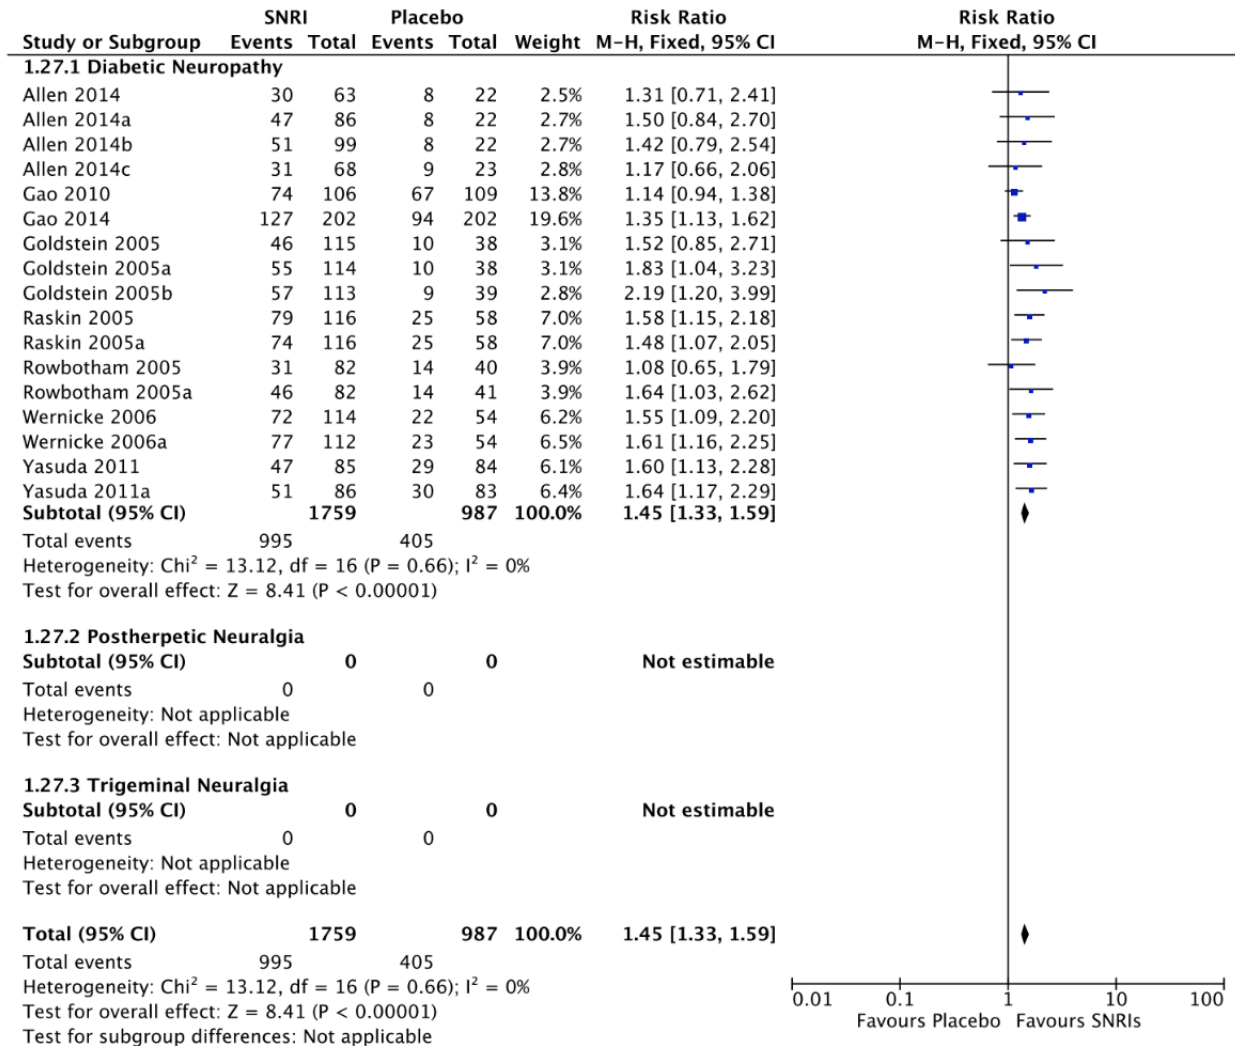

Figure 9.6: SNRIs versus control; Subgroup analysis: Proportion of patients with a meaningful response to treatment, analyzed by drug type

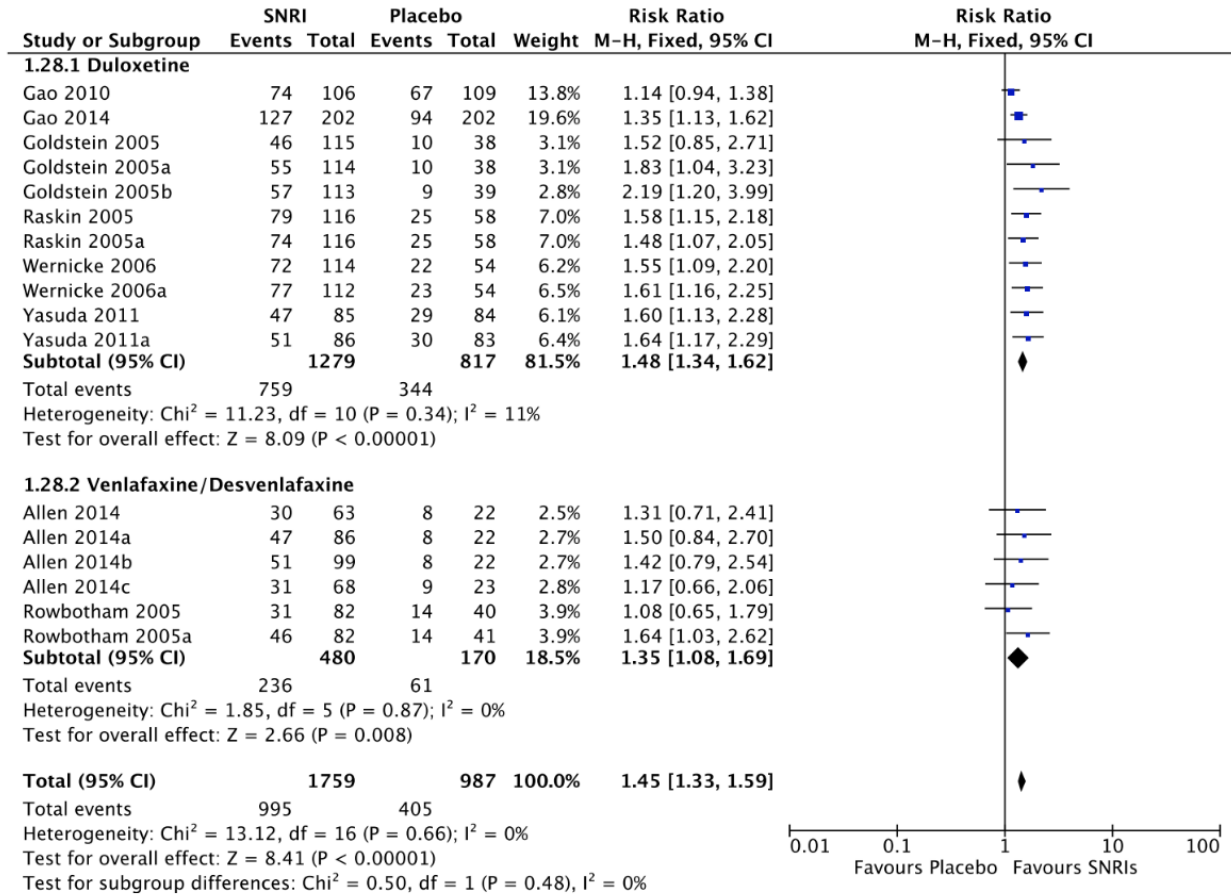



Figure 9.7: SNRIs versus control; Subgroup analysis: Proportion of patients with a meaningful response to treatment, analyzed by sample size

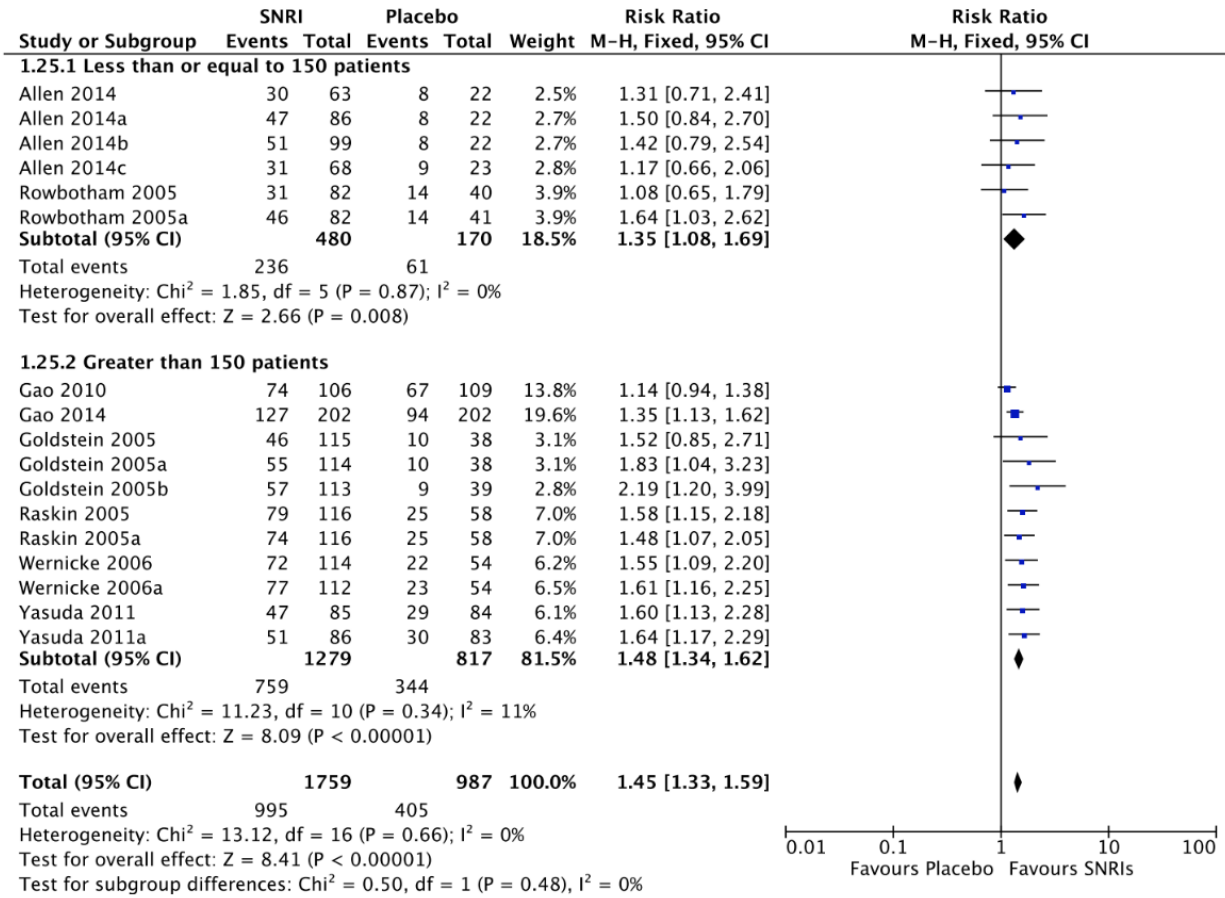

## TCAs

Figure 10.1: TCAs versus control; Outcome: Proportion of patients with a meaningful response to treatment (fixed effects)

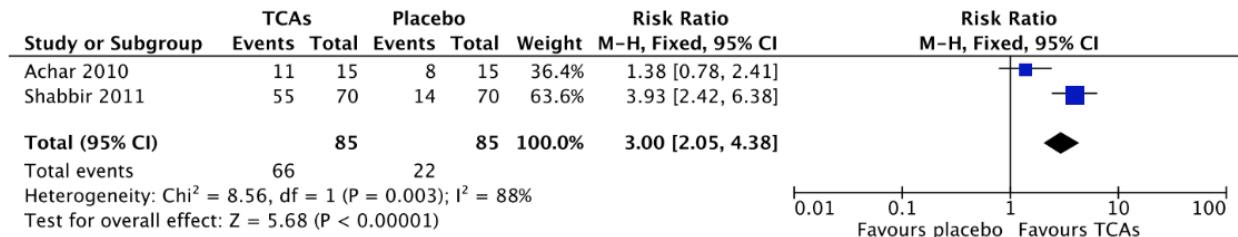

Figure 10.2: TCAs versus control; Outcome: Proportion of patients with a meaningful response to treatment (random effects)

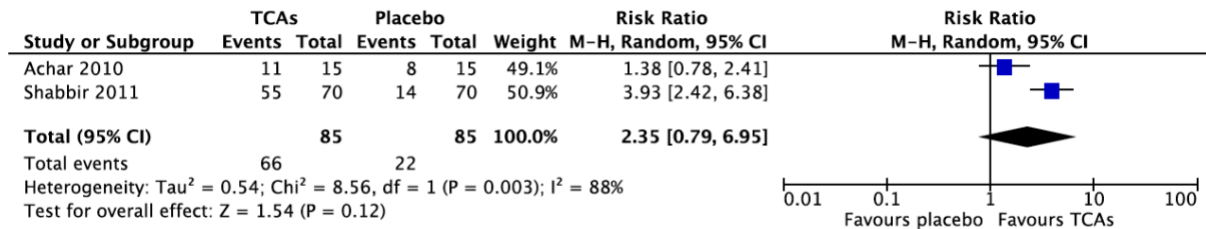

Figure 10.3: TCAs versus control; Outcome: Proportion of patients with a meaningful response to treatment at 4 weeks or less, 4 weeks to 12 weeks, and 12 weeks or greater (fixed effects)

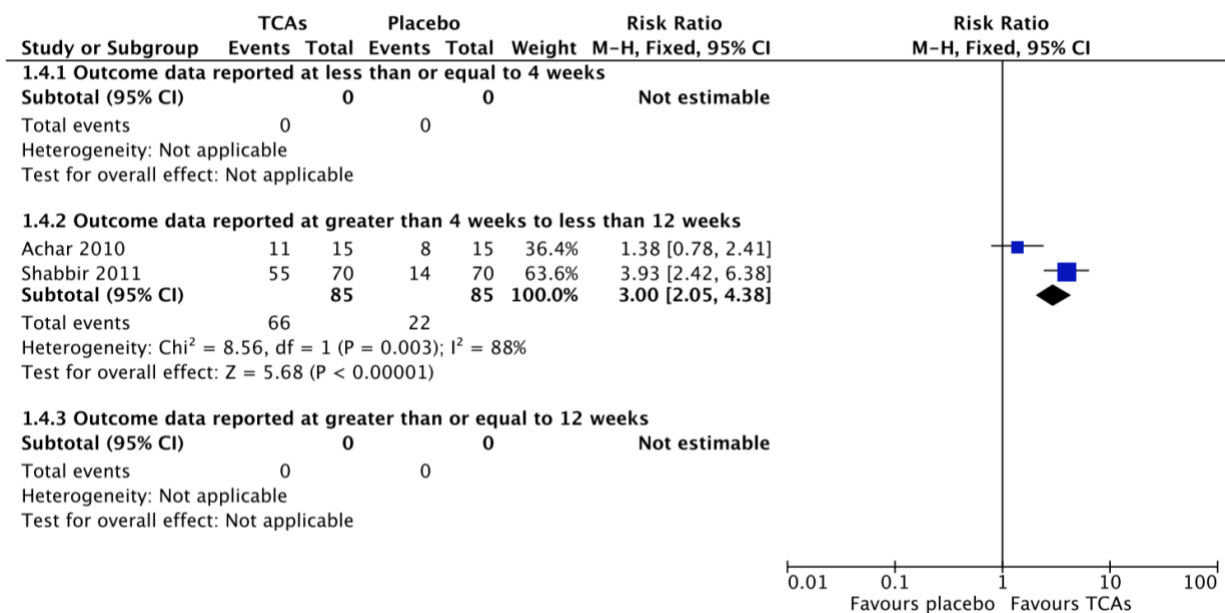

Figure 10.4: TCAs versus control; Outcome: Proportion of patients with a meaningful response to treatment at 4 weeks or less, 4 weeks to 12 weeks, and 12 weeks or greater (random effects)

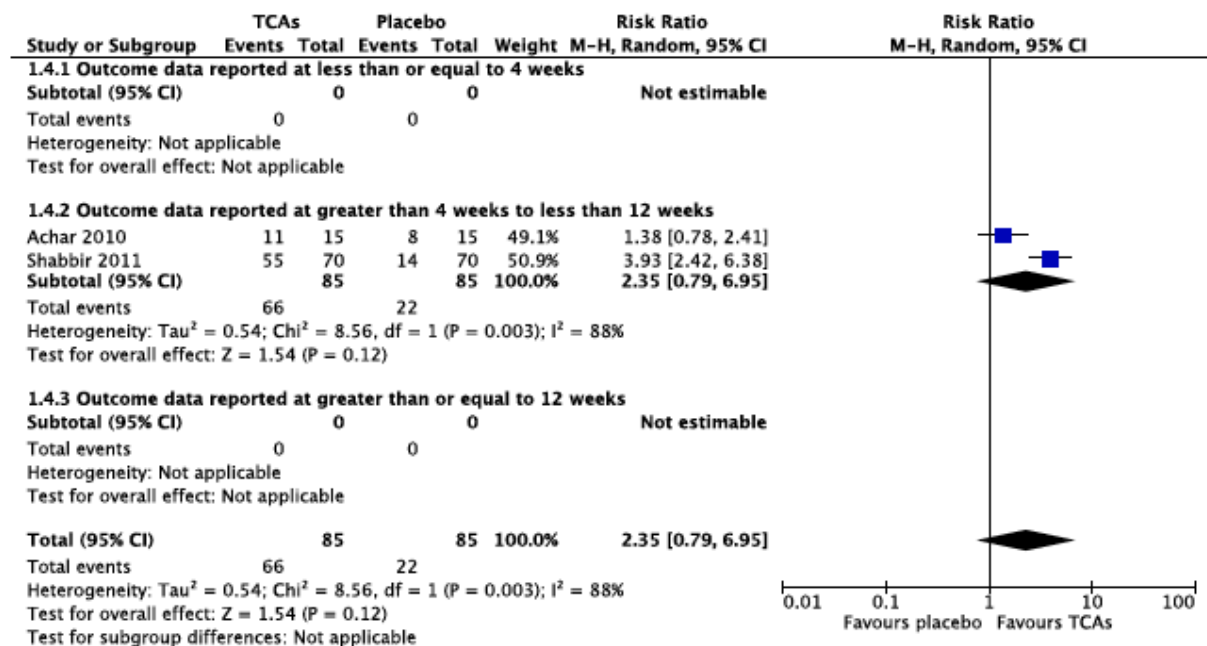

Figure 10.5: TCAs versus control; Subgroup analysis: Proportion of patients with a meaningful response to treatment, analyzed by neuropathic pain type (fixed effects)

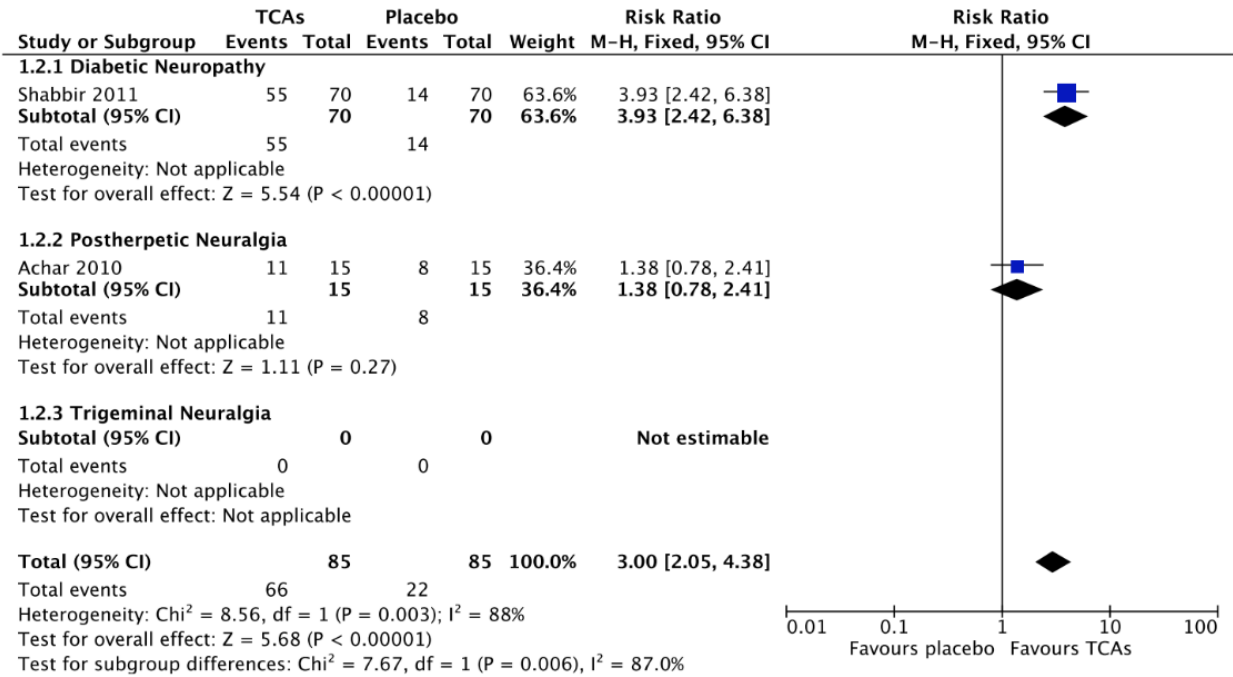

Figure 10.6: TCAs versus control; Subgroup analysis: Proportion of patients with a meaningful response to treatment, analyzed by neuropathic pain type (random effects)

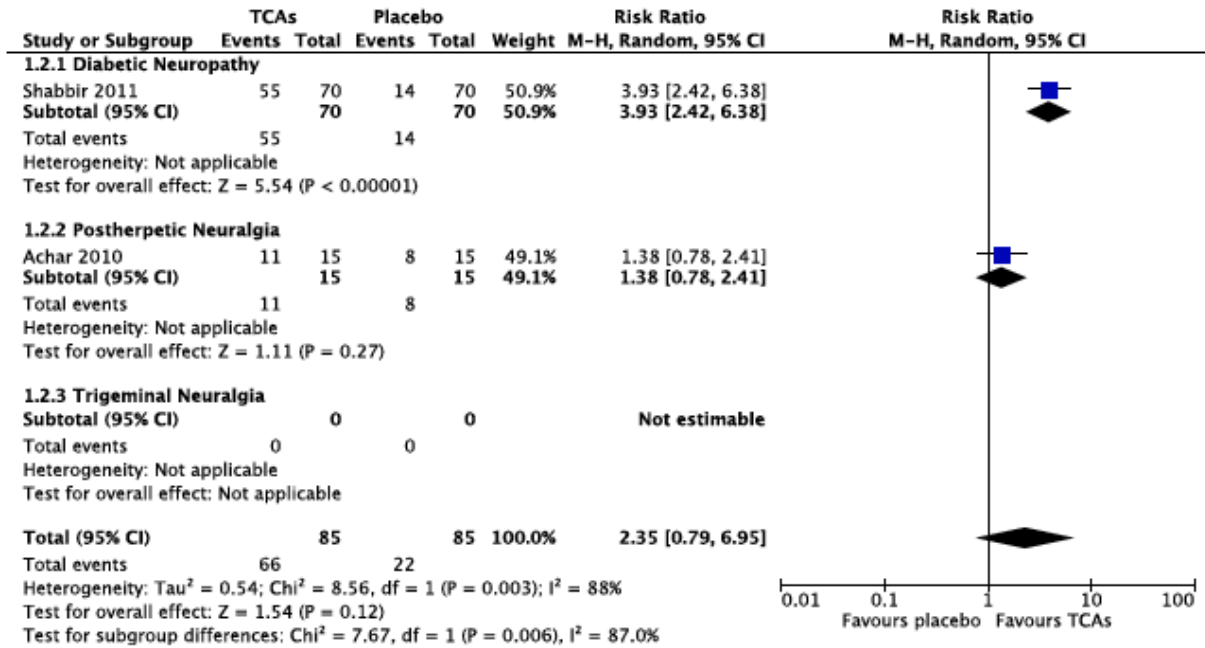

Figure 10.7: TCAs versus control; Subgroup analysis: Proportion of patients with a meaningful response to treatment, analyzed by sample size (fixed effects)

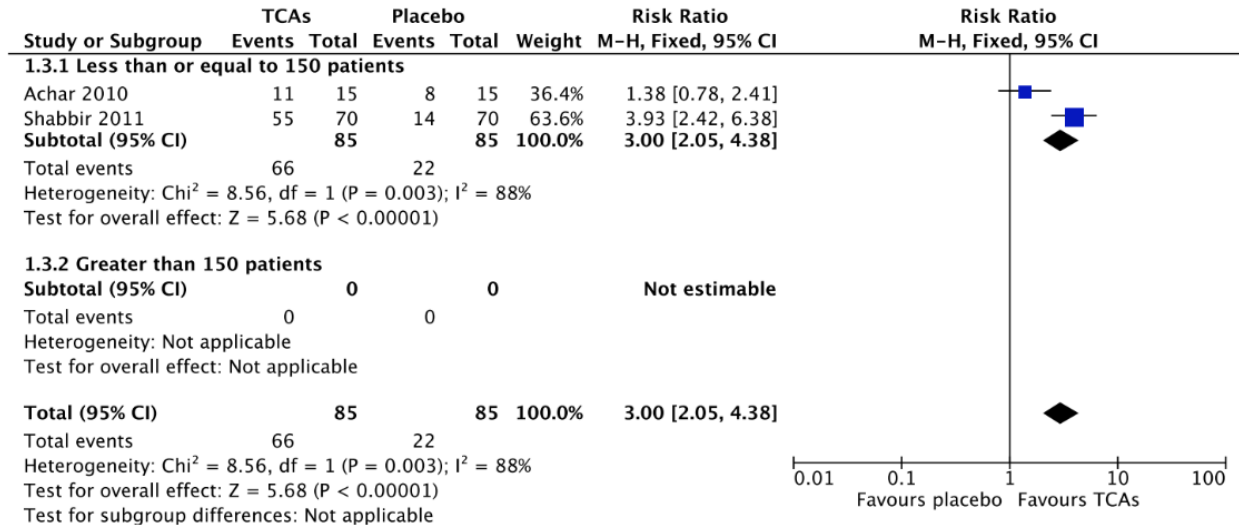

Figure 10.8: TCAs versus control; Subgroup analysis: Proportion of patients with a meaningful response to treatment, analyzed by sample size (random effects)

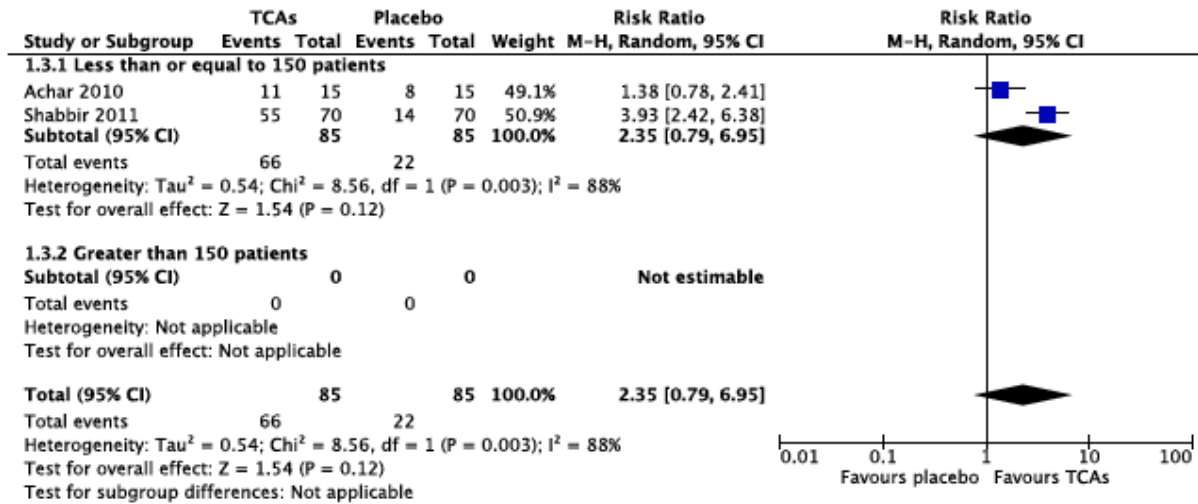

## Adverse Events

**Table 11: Individual Adverse Events (reported by single RCTs)**

| Intervention Type                 | Type of Adverse Event               | Randomized Controlled Trials | Intervention Control                                                                 | # of RCTs | # of Participants | Intervention Event Rate | Control Event Rate | Risk Ratio (95% Confidence Interval) | NNH |
|-----------------------------------|-------------------------------------|------------------------------|--------------------------------------------------------------------------------------|-----------|-------------------|-------------------------|--------------------|--------------------------------------|-----|
| <b>Acupuncture</b>                | Withdrawals due to Adverse Events   | Garrow 2014                  | Standardized Acupuncture; 10 weekly sessions<br>Sham Acupuncture; 10 weekly sessions | 1         | 59                | 7.1% (2/28)             | 3.2% (1/31)        | RR 2.21 (95% CI 0.21, 23.11)         | NSS |
| <b>Anticonvulsants-Gabapentin</b> | ≥1 treatment-emergent adverse event | Sang 2013                    | Gabapentin 1800 mg daily<br>Placebo                                                  | 1         | 452               | 31.2% (69/221)          | 17.3% (40/231)     | RR 1.80 (95% CI 1.28, 2.54)          | 8   |
| <b>Anticonvulsants-Gabapentin</b> | Adverse Events                      | Rice 2001                    | Gabapentin 1800 mg daily<br>Placebo                                                  | 1         | 334               | 70.4% (81/115)          | 49.1% (27/55)      | RR 1.43 (95% CI 1.07, 1.93)          | 5   |
| <b>Anticonvulsants-Gabapentin</b> | Adverse Events                      | Rice 2001                    | Gabapentin 2400 mg daily<br>Placebo                                                  | 1         | 334               | 75% (81/108)            | 50% (28/56)        | RR 1.50 (95% CI 1.13, 1.99)          | 4   |
| <b>Anticonvulsants-Gabapentin</b> | Adverse Events                      | Sang 2013                    | Gabapentin 1800 mg daily<br>Placebo                                                  | 1         | 452               | 53.4% (118/221)         | 39.8% (92/231)     | RR 1.34 (95% CI 1.10, 1.64)          | 8   |
| <b>Anticonvulsants-Gabapentin</b> | Ataxia                              | Rowbotham 1998               | Gabapentin 3600 mg daily<br>Placebo                                                  | 1         | 229               | 7.1% (8/113)            | 0% (0/116)         | RR 17.45 (95% CI 1.02, 298.78)       | 15  |
| <b>Anticonvulsants-Gabapentin</b> | Nervous System Disorders            | Wallace 2010                 | Gabapentin 1800 mg in divided doses                                                  | 1         | 405               | 25.4% (34/134)          | 11.9% (8/67)       | RR 2.13 (95% CI 1.04, 4.33)          | 8   |

|                                   |                                  |                 | Placebo                                        |   |     |                   |                   |                                |     |
|-----------------------------------|----------------------------------|-----------------|------------------------------------------------|---|-----|-------------------|-------------------|--------------------------------|-----|
| <b>Anticonvulsants-Gabapentin</b> | Treatment-related adverse events | Rowbotham 1998  | Gabapentin 3600 mg daily<br>Placebo            | 1 | 229 | 54.9%<br>(62/113) | 27.6%<br>(32/116) | RR 1.99<br>(95% CI 1.42, 2.79) | 4   |
| <b>Anticonvulsants-Gabapentin</b> | Adverse Events                   | Backonja 2011   | Gabapentin 624 mg daily<br>Placebo             | 1 | 101 | 53.2%<br>(25/47)  | 46.35<br>(25/54)  | RR 1.15<br>(95% CI 0.78, 1.70) | NSS |
| <b>Anticonvulsants-Gabapentin</b> | Adverse Events                   | Rauck 2012      | Gabapentin 1200 mg daily<br>Placebo            | 1 | 420 | 72.6%<br>(45/62)  | 63.3%<br>(19/30)  | RR 1.15<br>(95% CI 0.84, 1.57) | NSS |
| <b>Anticonvulsants-Gabapentin</b> | Adverse Events                   | Rauck 2012      | Gabapentin 2400 mg daily<br>Placebo            | 1 | 420 | 67.9%<br>(38/56)  | 66.7%<br>(20/30)  | RR 1.02<br>(95% CI 0.75, 1.39) | NSS |
| <b>Anticonvulsants-Gabapentin</b> | Adverse Events                   | Rauck 2012      | Gabapentin 3600 mg daily<br>Placebo            | 1 | 420 | 74.1%<br>(86/116) | 66.7%<br>(20/30)  | RR 1.11<br>(95% CI 0.84, 1.46) | NSS |
| <b>Anticonvulsants-Gabapentin</b> | Adverse Events                   | Sandercock 2012 | Gabapentin 3000 mg once daily<br>Placebo       | 1 | 147 | 57.4%<br>(27/47)  | 40%<br>(10/25)    | RR 1.44<br>(95% CI 0.84, 2.46) | NSS |
| <b>Anticonvulsants-Gabapentin</b> | Adverse Events                   | Sandercock 2012 | Gabapentin 3000 mg in divided doses<br>Placebo | 1 | 147 | 46.9%<br>(23/49)  | 38.5%<br>(10/26)  | RR 1.22<br>(95% CI 0.69, 2.16) | NSS |
| <b>Anticonvulsants-Gabapentin</b> | Adverse Events                   | Wallace 2010    | Gabapentin 1800 mg daily dose<br>Placebo       | 1 | 405 | 56.5%<br>(78/138) | 48.5%<br>(32/66)  | RR 1.17<br>(95% CI 0.87, 1.56) | NSS |
| <b>Anticonvulsants-Gabapentin</b> | Adverse Events                   | Wallace 2010    | Gabapentin 1800 mg in divided doses<br>Placebo | 1 | 405 | 57.5%<br>(77/134) | 47.8%<br>(32/67)  | RR 1.20<br>(95% CI 0.90, 1.61) | NSS |
| <b>Anticonvulsants-Gabapentin</b> | Adverse Events                   | Zhang 2013      | Gabapentin 1200 mg daily<br>Placebo            | 1 | 371 | 70.1%<br>(75/107) | 67.7%<br>(21/31)  | RR 1.03<br>(95% CI 0.79, 1.36) | NSS |

|                                   |                |               |                                        |   |     |                  |                  |                                       |     |
|-----------------------------------|----------------|---------------|----------------------------------------|---|-----|------------------|------------------|---------------------------------------|-----|
| <b>Anticonvulsants-Gabapentin</b> | Adverse Events | Zhang 2013    | Gabapentin<br>2400 mg daily<br>Placebo | 1 | 371 | 78.0%<br>(64/82) | 65.6%<br>(21/32) | RR 1.19<br>(95% CI<br>0.90, 1.57)     | NSS |
| <b>Anticonvulsants-Gabapentin</b> | Adverse Events | Zhang 2013    | Gabapentin<br>3600 mg daily<br>Placebo | 1 | 371 | 81.6%<br>(71/87) | 65.6%<br>(21/32) | RR 1.24<br>(95% CI<br>0.95, 1.63)     | NSS |
| <b>Anticonvulsants-Gabapentin</b> | Asthenia       | Rice 2001     | Gabapentin<br>1800 mg daily<br>Placebo | 1 | 334 | 6.1%<br>(7/115)  | 3.6%<br>(2/55)   | RR 1.67<br>(95% CI<br>0.36, 7.79)     | NSS |
| <b>Anticonvulsants-Gabapentin</b> | Asthenia       | Rice 2001     | Gabapentin<br>2400 mg daily<br>Placebo | 1 | 334 | 5.6%<br>(6/108)  | 3.6%<br>(2/56)   | RR 1.56<br>(95% CI<br>0.32, 7.46)     | NSS |
| <b>Anticonvulsants-Gabapentin</b> | Bronchitis     | Rauck 2012    | Gabapentin<br>1200 mg daily<br>Placebo | 1 | 420 | 4.8%<br>(3/62)   | 0%<br>(0/30)     | RR 3.44<br>(95% CI<br>0.18,<br>64.63) | NSS |
| <b>Anticonvulsants-Gabapentin</b> | Bronchitis     | Rauck 2012    | Gabapentin<br>2400 mg daily<br>Placebo | 1 | 420 | 1.8%<br>(1/56)   | 0%<br>(0/30)     | RR 1.63<br>(95% CI<br>0.07,<br>38.87) | NSS |
| <b>Anticonvulsants-Gabapentin</b> | Bronchitis     | Rauck 2012    | Gabapentin<br>3600 mg daily<br>Placebo | 1 | 420 | 0%<br>(0/116)    | 0%<br>(0/30)     | -                                     | -   |
| <b>Anticonvulsants-Gabapentin</b> | Confusion      | Backonja 1998 | Gabapentin<br>3600 mg daily<br>Placebo | 1 | 165 | 8.3%<br>(7/84)   | 1.2%<br>(1/81)   | RR 6.75<br>(95% CI<br>0.85,<br>53.65) | NSS |
| <b>Anticonvulsants-Gabapentin</b> | Death          | Rice 2001     | Gabapentin<br>1800 mg daily<br>Placebo | 1 | 334 | 0%<br>(0/115)    | 0%<br>(0/55)     | -                                     | -   |
| <b>Anticonvulsants-Gabapentin</b> | Death          | Rice 2001     | Gabapentin<br>2400 mg daily<br>Placebo | 1 | 334 | 0.93%<br>(1/108) | 0%<br>(0/56)     | RR 1.57<br>(95% CI<br>0.06,<br>37.90) | NSS |
| <b>Anticonvulsants-Gabapentin</b> | Depression     | Backonja 2011 | Gabapentin<br>624 mg daily<br>Placebo  | 1 | 101 | 0%<br>(0/47)     | 5.6%<br>(3/54)   | RR 0.16<br>(95% CI<br>0.01, 3.09)     | NSS |



|                                   |                          |            |                                  |   |     |               |             |                              |     |
|-----------------------------------|--------------------------|------------|----------------------------------|---|-----|---------------|-------------|------------------------------|-----|
| <b>Anticonvulsants-Gabapentin</b> | Disturbance in Attention | Rauck 2012 | Gabapentin 1200 mg daily Placebo | 1 | 420 | 3.2% (2/62)   | 0% (0/30)   | RR 2.46 (95% CI 0.12, 49.71) | NSS |
| <b>Anticonvulsants-Gabapentin</b> | Disturbance in Attention | Rauck 2012 | Gabapentin 2400 mg daily Placebo | 1 | 420 | 0% (0/56)     | 0% (0/30)   | -                            | -   |
| <b>Anticonvulsants-Gabapentin</b> | Disturbance in Attention | Rauck 2012 | Gabapentin 3600 mg daily Placebo | 1 | 420 | 1.7% (2/116)  | 3.3% (1/30) | RR 0.52 (95% CI 0.05, 5.51)  | NSS |
| <b>Anticonvulsants-Gabapentin</b> | Excoriation              | Rauck 2012 | Gabapentin 1200 mg daily Placebo | 1 | 420 | 1.6% (1/62)   | 0% (0/30)   | RR 1.48 (95% CI 0.06, 35.20) | NSS |
| <b>Anticonvulsants-Gabapentin</b> | Excoriation              | Rauck 2012 | Gabapentin 2400 mg daily Placebo | 1 | 420 | 1.8% (1/56)   | 0% (0/30)   | RR 1.63 (95% CI 0.07, 38.87) | NSS |
| <b>Anticonvulsants-Gabapentin</b> | Excoriation              | Rauck 2012 | Gabapentin 3600 mg daily Placebo | 1 | 420 | 0.86% (1/116) | 0% (0/30)   | RR 0.79 (95% CI 0.03, 19.04) | NSS |
| <b>Anticonvulsants-Gabapentin</b> | Falls                    | Rauck 2012 | Gabapentin 1200 mg daily Placebo | 1 | 420 | 4.8% (3/62)   | 0% (0/30)   | RR 3.44 (95% CI 0.18, 64.63) | NSS |
| <b>Anticonvulsants-Gabapentin</b> | Falls                    | Rauck 2012 | Gabapentin 2400 mg daily Placebo | 1 | 420 | 1.8% (1/56)   | 0% (0/30)   | RR 1.63 (95% CI 0.07, 38.87) | NSS |
| <b>Anticonvulsants-Gabapentin</b> | Falls                    | Rauck 2012 | Gabapentin 3600 mg daily Placebo | 1 | 420 | 0.86% (1/116) | 0% (0/30)   | RR 0.79 (95% CI 0.03, 19.04) | NSS |
| <b>Anticonvulsants-Gabapentin</b> | Flatulence               | Zhang 2013 | Gabapentin 1200 mg daily Placebo | 1 | 371 | 0.93% (1/107) | 0% (0/31)   | RR 0.89 (95% CI              | NSS |

|                                        |                               |              |                                                      |   |     |                   |                  |                                       |     |
|----------------------------------------|-------------------------------|--------------|------------------------------------------------------|---|-----|-------------------|------------------|---------------------------------------|-----|
|                                        |                               |              |                                                      |   |     |                   |                  | 0.04,<br>21.30)                       |     |
| <b>Anticonvulsants-<br/>Gabapentin</b> | Flatulence                    | Zhang 2013   | Gabapentin<br>2400 mg daily<br>Placebo               | 1 | 371 | 1.2%<br>(1/82)    | 0%<br>(0/32)     | RR 1.19<br>(95% CI<br>0.05,<br>28.54) | NSS |
| <b>Anticonvulsants-<br/>Gabapentin</b> | Flatulence                    | Zhang 2013   | Gabapentin<br>3600 mg daily<br>Placebo               | 1 | 371 | 4.6%<br>(4/87)    | 0%<br>(0/32)     | RR 3.38<br>(95% CI<br>0.19,<br>60.99) | NSS |
| <b>Anticonvulsants-<br/>Gabapentin</b> | Gastrointestinal<br>Disorders | Wallace 2010 | Gabapentin<br>1800 mg daily<br>dose<br>Placebo       | 1 | 405 | 13.8%<br>(19/138) | 16.7%<br>(11/66) | RR 0.83<br>(95% CI<br>0.42, 1.63)     | NSS |
| <b>Anticonvulsants-<br/>Gabapentin</b> | Gastrointestinal<br>Disorders | Wallace 2010 | Gabapentin<br>1800 mg in<br>divided doses<br>Placebo | 1 | 405 | 15.7%<br>(21/134) | 16.4%<br>(11/67) | RR 0.95<br>(95% CI<br>0.49, 1.86)     | NSS |
| <b>Anticonvulsants-<br/>Gabapentin</b> | Hypertension                  | Zhang 2013   | Gabapentin<br>1200 mg daily<br>Placebo               | 1 | 371 | 1.9%<br>(2/107)   | 0%<br>(0/31)     | RR 1.48<br>(95% CI<br>0.07,<br>30.08) | NSS |
| <b>Anticonvulsants-<br/>Gabapentin</b> | Hypertension                  | Zhang 2013   | Gabapentin<br>2400 mg daily<br>Placebo               | 1 | 371 | 4.9%<br>(4/82)    | 0%<br>(0/32)     | RR 3.58<br>(95% CI<br>0.20,<br>64.63) | NSS |
| <b>Anticonvulsants-<br/>Gabapentin</b> | Hypertension                  | Zhang 2013   | Gabapentin<br>3600 mg daily<br>Placebo               | 1 | 371 | 2.3%<br>(2/87)    | 3.1%<br>(1/32)   | RR 0.74<br>(95% CI<br>0.07, 7.84)     | NSS |
| <b>Anticonvulsants-<br/>Gabapentin</b> | Hypoesthesia                  | Rauck 2012   | Gabapentin<br>1200 mg daily<br>Placebo               | 1 | 420 | 1.6%<br>(1/62)    | 0%<br>(0/30)     | RR 1.48<br>(95% CI<br>0.06,<br>35.20) | NSS |
| <b>Anticonvulsants-<br/>Gabapentin</b> | Hypoesthesia                  | Rauck 2012   | Gabapentin<br>2400 mg daily<br>Placebo               | 1 | 420 | 1.8%<br>(1/56)    | 0%<br>(0/30)     | RR 1.63<br>(95% CI<br>0.07,<br>38.87) | NSS |

|                                     |                    |                |                                        |   |     |                  |                 |                                       |     |
|-------------------------------------|--------------------|----------------|----------------------------------------|---|-----|------------------|-----------------|---------------------------------------|-----|
| <b>Anticonvulsants-Gabapentin</b>   | Hypoesthesia       | Rauck 2012     | Gabapentin<br>3600 mg daily<br>Placebo | 1 | 420 | 0%<br>(0/116)    | 0%<br>(0/30)    | -                                     | -   |
| <b>Anticonvulsants-Gabapentin</b>   | Increased Appetite | Rauck 2012     | Gabapentin<br>1200 mg daily<br>Placebo | 1 | 420 | 0%<br>(0/62)     | 3.3%<br>(1/30)  | RR 0.16<br>(95% CI<br>0.01, 3.91)     | NSS |
| <b>Anticonvulsants-Gabapentin</b>   | Increased Appetite | Rauck 2012     | Gabapentin<br>2400 mg daily<br>Placebo | 1 | 420 | 5.4%<br>(3/56)   | 3.3%<br>(1/30)  | RR 1.61<br>(95% CI<br>0.17,<br>14.79) | NSS |
| <b>Anticonvulsants-Gabapentin</b>   | Increased Appetite | Rauck 2012     | Gabapentin<br>3600 mg daily<br>Placebo | 1 | 420 | 0.86%<br>(1/116) | 3.3%<br>(1/30)  | RR 0.26<br>(95% CI<br>0.02, 4.02)     | NSS |
| <b>Anticonvulsants-Gabapentin</b>   | Infection          | Rowbotham 1998 | Gabapentin<br>3600 mg daily<br>Placebo | 1 | 229 | 8.0%<br>(9/113)  | 2.6%<br>(3/116) | RR 3.08<br>(95% CI<br>0.86,<br>11.08) | NSS |
| <b>Anticonvulsants-Gabapentin</b>   | Joint Sprain       | Zhang 2013     | Gabapentin<br>1200 mg daily<br>Placebo | 1 | 371 | 1.9%<br>(2/107)  | 0%<br>(0/31)    | RR 1.48<br>(95% CI<br>0.07,<br>30.08) | NSS |
| <b>Anticonvulsants-Gabapentin</b>   | Joint Sprain       | Zhang 2013     | Gabapentin<br>2400 mg daily<br>Placebo | 1 | 371 | 0%<br>(0/82)     | 0%<br>(0/32)    | -                                     | -   |
| <b>Anticonvulsants-Gabapentin</b>   | Joint Sprain       | Zhang 2013     | Gabapentin<br>3600 mg daily<br>Placebo | 1 | 371 | 4.6%<br>(4/87)   | 0%<br>(0/32)    | RR 3.38<br>(95% CI<br>0.19,<br>60.99) | NSS |
| <b>Anticonvulsants-Gabapentin</b>   | Muscle Spasms      | Rauck 2012     | Gabapentin<br>1200 mg daily<br>Placebo | 1 | 420 | 9.7%<br>(6/62)   | 3.3%<br>(1/30)  | RR 2.90<br>(95% CI<br>0.37,<br>23.05) | NSS |
| <b>Anticonvulsants-Gabapentin</b>   | Muscle Spasms      | Rauck 2012     | Gabapentin<br>2400 mg daily<br>Placebo | 1 | 420 | 0%<br>(0/56)     | 3.3%<br>(1/30)  | RR 0.18<br>(95% CI<br>0.01, 4.32)     | NSS |
| <b>(Anticonvulsants-Gabapentin)</b> | Muscle Spasms      | Rauck 2012     | Gabapentin<br>3600 mg daily            | 1 | 420 | 9.5%<br>(11/116) | 3.3%<br>(1/30)  | RR 2.84<br>(95% CI                    | NSS |

|                                        |                             |                |                                                |   |     |                   |                   |                                       |     |
|----------------------------------------|-----------------------------|----------------|------------------------------------------------|---|-----|-------------------|-------------------|---------------------------------------|-----|
|                                        |                             |                | Placebo                                        |   |     |                   |                   | 0.38,<br>21.18)                       |     |
| <b>Anticonvulsants-<br/>Gabapentin</b> | Nasal Congestion            | Zhang 2013     | Gabapentin<br>1200 mg daily<br>Placebo         | 1 | 371 | 1.9%<br>(2/107)   | 0%<br>(0/31)      | RR 1.48<br>(95% CI<br>0.07,<br>30.08) | NSS |
| <b>Anticonvulsants-<br/>Gabapentin</b> | Nasal Congestion            | Zhang 2013     | Gabapentin<br>2400 mg daily<br>Placebo         | 1 | 371 | 0%<br>(0/82)      | 0%<br>(0/32)      | -                                     | -   |
| <b>Anticonvulsants-<br/>Gabapentin</b> | Nasal Congestion            | Zhang 2013     | Gabapentin<br>3600 mg daily<br>Placebo         | 1 | 371 | 5.8%<br>(5/87)    | 3.1%<br>(1/32)    | RR 1.84<br>(95% CI<br>0.22,<br>15.15) | NSS |
| <b>Anticonvulsants-<br/>Gabapentin</b> | Nervous System<br>Disorders | Wallace 2010   | Gabapentin<br>1800 mg daily<br>dose<br>Placebo | 1 | 405 | 19.6%<br>(27/138) | 12.1%<br>(8/66)   | RR 1.61<br>(95% CI<br>0.78, 3.36)     | NSS |
| <b>Anticonvulsants-<br/>Gabapentin</b> | Pain                        | Rowbotham 1998 | Gabapentin<br>3600 mg daily<br>Placebo         | 1 | 229 | 4.4%<br>(5/113)   | 10.3%<br>(12/116) | RR 0.43<br>(95% CI<br>0.16, 1.18)     | NSS |
| <b>Anticonvulsants-<br/>Gabapentin</b> | Pain in Extremity           | Rauck 2012     | Gabapentin<br>1200 mg daily<br>Placebo         | 1 | 420 | 1.6%<br>(1/62)    | 0%<br>(0/30)      | RR 1.48<br>(95% CI<br>0.06,<br>35.20) | NSS |
| <b>Anticonvulsants-<br/>Gabapentin</b> | Pain in Extremity           | Rauck 2012     | Gabapentin<br>2400 mg daily<br>Placebo         | 1 | 420 | 7.1%<br>(4/56)    | 0%<br>(0/30)      | RR 4.89<br>(95% CI<br>0.27,<br>87.97) | NSS |
| <b>Anticonvulsants-<br/>Gabapentin</b> | Pain in Extremity           | Rauck 2012     | Gabapentin<br>3600 mg daily<br>Placebo         | 1 | 420 | 5.2%<br>(6/116)   | 3.3%<br>(1/30)    | RR 1.55<br>(95% CI<br>0.19,<br>12.40) | NSS |
| <b>Anticonvulsants-<br/>Gabapentin</b> | Paresthesia                 | Rauck 2012     | Gabapentin<br>1200 mg daily<br>Placebo         | 1 | 420 | 3.2%<br>(2/62)    | 0%<br>(0/30)      | RR 2.46<br>(95% CI<br>0.12,<br>49.71) | NSS |

|                                      |                            |               |                                           |   |     |                  |                  |                                       |     |
|--------------------------------------|----------------------------|---------------|-------------------------------------------|---|-----|------------------|------------------|---------------------------------------|-----|
| <b>Anticonvulsants-Gabapentin</b>    | Paresthesia                | Rauck 2012    | Gabapentin<br>2400 mg daily<br>Placebo    | 1 | 420 | 1.8%<br>(1/56)   | 0%<br>(0/30)     | RR 1.63<br>(95% CI<br>0.07,<br>38.87) | NSS |
| <b>Anticonvulsants-Gabapentin</b>    | Paresthesia                | Rauck 2012    | Gabapentin<br>3600 mg daily<br>Placebo    | 1 | 420 | 0%<br>(0/116)    | 0%<br>(0/30)     | -                                     | -   |
| <b>Anticonvulsants-Gabapentin</b>    | Postherpetic<br>Neuralgia  | Backonja 2011 | Gabapentin<br>624 mg daily<br>Placebo     | 1 | 101 | 2.1%<br>(1/47)   | 5.6%<br>(3/54)   | RR 0.38<br>(95% CI<br>0.04, 3.56)     | NSS |
| <b>Anticonvulsants-Gabapentin</b>    | Tremor                     | Zhang 2013    | Gabapentin<br>1200 mg daily<br>Placebo    | 1 | 371 | 0%<br>(0/107)    | 0%<br>(0/31)     | -                                     | -   |
| <b>Anticonvulsants-Gabapentin</b>    | Tremor                     | Zhang 2013    | Gabapentin<br>2400 mg daily<br>Placebo    | 1 | 371 | 0%<br>(0/82)     | 0%<br>(0/32)     | -                                     | -   |
| <b>Anticonvulsants-Gabapentin</b>    | Tremor                     | Zhang 2013    | Gabapentin<br>3600 mg daily<br>Placebo    | 1 | 371 | 4.6%<br>(4/87)   | 0%<br>(0/32)     | RR 3.38<br>(95% CI<br>0.19,<br>60.99) | NSS |
| <b>Anticonvulsants-Gabapentin</b>    | Vomiting                   | Rauck 2012    | Gabapentin<br>1200 mg daily<br>Placebo    | 1 | 420 | 4.8%<br>(3/62)   | 0%<br>(0/30)     | RR 3.44<br>(95% CI<br>0.18,<br>64.63) | NSS |
| <b>Anticonvulsants-Gabapentin</b>    | Vomiting                   | Rauck 2012    | Gabapentin<br>2400 mg daily<br>Placebo    | 1 | 420 | 1.8%<br>(1/56)   | 3.3%<br>(1/30)   | RR 0.54<br>(95% CI<br>0.03, 8.26)     | NSS |
| <b>Anticonvulsants-Gabapentin</b>    | Vomiting                   | Rauck 2012    | Gabapentin<br>3600 mg daily<br>Placebo    | 1 | 420 | 1.7%<br>(2/116)  | 3.3%<br>(1/30)   | RR 0.52<br>(95% CI<br>0.05, 5.51)     | NSS |
| <b>Anticonvulsants-Oxcarbazepine</b> | Adverse Events             | CTRI476G2301  | Oxcarbazepine<br>1200 mg daily<br>Placebo | 1 | 141 | 87.3%<br>(62/71) | 58.6%<br>(41/70) | RR 1.49<br>(95% CI<br>1.20, 1.85)     | 4   |
| <b>Anticonvulsants-Oxcarbazepine</b> | Aggravated<br>Hypertension | CTRI476G2301  | Oxcarbazepine<br>1200 mg daily<br>Placebo | 1 | 141 | 8.5%<br>(6/71)   | 2.9%<br>(2/70)   | RR 2.96<br>(95% CI<br>0.62,<br>14.16) | NSS |

|                                           |                         |              |                                           |   |     |                |                |                                         |     |
|-------------------------------------------|-------------------------|--------------|-------------------------------------------|---|-----|----------------|----------------|-----------------------------------------|-----|
| <b>Anticonvulsants-<br/>Oxcarbazepine</b> | Blurred Vision          | Dogra 2005   | Oxcarbazepine<br>1800 mg daily<br>Placebo | 1 | 146 | 1.8%<br>(1/55) | 1.4%<br>(1/70) | RR 1.27<br>(95% CI<br>0.08,<br>19.89)   | NSS |
| <b>Anticonvulsants-<br/>Oxcarbazepine</b> | Cough                   | CTRI476G2301 | Oxcarbazepine<br>1200 mg daily<br>Placebo | 1 | 141 | 5.6%<br>(4/71) | 2.9%<br>(2/70) | RR 1.97<br>(95% CI<br>0.37,<br>10.42)   | NSS |
| <b>Anticonvulsants-<br/>Oxcarbazepine</b> | Death                   | CTRI476G2301 | Oxcarbazepine<br>1200 mg daily<br>Placebo | 1 | 141 | 0%<br>(0/71)   | 0%<br>(0/70)   | -                                       | -   |
| <b>Anticonvulsants-<br/>Oxcarbazepine</b> | Dyspepsia               | CTRI476G2301 | Oxcarbazepine<br>1200 mg daily<br>Placebo | 1 | 141 | 5.6%<br>(4/71) | 0%<br>(0/70)   | RR 8.88<br>(95% CI<br>0.49,<br>161.84)  | NSS |
| <b>Anticonvulsants-<br/>Oxcarbazepine</b> | Hyponatremia            | CTRI476G2301 | Oxcarbazepine<br>1200 mg daily<br>Placebo | 1 | 141 | 9.9%<br>(7/71) | 0%<br>(0/70)   | RR 14.79<br>(95% CI<br>0.86,<br>254.17) | NSS |
| <b>Anticonvulsants-<br/>Oxcarbazepine</b> | Peripheral Edema        | CTRI476G2301 | Oxcarbazepine<br>1200 mg daily<br>Placebo | 1 | 141 | 5.6%<br>(4/71) | 0%<br>(0/70)   | RR 8.88<br>(95% CI<br>0.49,<br>161.84)  | NSS |
| <b>Anticonvulsants-<br/>Oxcarbazepine</b> | Upper Abdominal<br>Pain | CTRI476G2301 | Oxcarbazepine<br>1200 mg daily<br>Placebo | 1 | 141 | 5.6%<br>(4/71) | 0%<br>(0/70)   | RR 8.88<br>(95% CI<br>0.49,<br>161.84)  | NSS |
| <b>Anticonvulsants-<br/>Oxcarbazepine</b> | Vertigo                 | CTRI476G2301 | Oxcarbazepine<br>1200 mg daily<br>Placebo | 1 | 141 | 8.5%<br>(6/71) | 0%<br>(0/70)   | RR 12.82<br>(95% CI<br>0.74,<br>223.34) | NSS |
| <b>Anticonvulsants-<br/>Oxcarbazepine</b> | Vomiting                | Dogra 2005   | Oxcarbazepine<br>1800 mg daily<br>Placebo | 1 | 146 | 3.6%<br>(2/55) | 1.4%<br>(1/70) | RR 2.55<br>(95% CI<br>0.24,<br>27.35)   | NSS |

|                                   |                                      |                  |                                                |   |     |                |                |                             |     |
|-----------------------------------|--------------------------------------|------------------|------------------------------------------------|---|-----|----------------|----------------|-----------------------------|-----|
| <b>Anticonvulsants-Pregabalin</b> | ≥1 Adverse Event                     | Stacey 2008      | Pregabalin Flexible Dose (mean 396 mg) Placebo | 1 | 269 | 72.5% (66/91)  | 42.2% (19/45)  | RR 1.72 (95% CI 1.19, 2.47) | 4   |
| <b>Anticonvulsants-Pregabalin</b> | Adverse Events                       | Dworkin 2003     | Pregabalin 300-600 mg daily Placebo            | 1 | 173 | 86.5% (77/89)  | 63.1% (53/84)  | RR 1.37 (95% CI 1.14, 1.65) | 5   |
| <b>Anticonvulsants-Pregabalin</b> | Adverse Events                       | Liu 2017         | Pregabalin 300 mg daily Placebo                | 1 | 220 | 64.0% (71/111) | 44.0% (48/109) | RR 1.45 (95% CI 1.13, 1.87) | 5   |
| <b>Anticonvulsants-Pregabalin</b> | Adverse Events                       | Moon 2010        | Pregabalin 600 mg daily Placebo                | 1 | 240 | 50% (81/162)   | 35.9% (28/78)  | RR 1.39 (95% CI 1.00, 1.95) | 8   |
| <b>Anticonvulsants-Pregabalin</b> | Adverse Events                       | NCT00394901 2006 | Pregabalin 300 mg daily Placebo                | 1 | 372 | 68.5% (61/89)  | 36.4% (12/33)  | RR 1.88 (95% CI 1.17, 3.02) | 4   |
| <b>Anticonvulsants-Pregabalin</b> | Adverse Events                       | NCT00394901 2006 | Pregabalin 600 mg daily Placebo                | 1 | 372 | 79.4% (77/97)  | 36.4% (12/33)  | RR 2.18 (95% CI 1.37, 3.47) | 3   |
| <b>Anticonvulsants-Pregabalin</b> | ≥1 Adverse Event                     | Arezzo 2008      | Pregabalin 600 mg daily Placebo                | 1 | 167 | 84.1% (69/82)  | 77.6% (66/85)  | RR 1.08 (95% CI 0.93, 1.26) | NSS |
| <b>Anticonvulsants-Pregabalin</b> | ≥1 Adverse Event                     | Stacey 2008      | Pregabalin Fixed Dose (mean 295 mg) Placebo    | 1 | 269 | 62.5% (55/88)  | 44.4% (20/45)  | RR 1.41 (95% CI 0.98, 2.02) | NSS |
| <b>Anticonvulsants-Pregabalin</b> | ≥1 treatment-emergent adverse events | Huffman 2015     | Pregabalin 150-300 mg daily Placebo            | 1 | 384 | 47.5% (94/198) | 41.9% (78/186) | RR 1.13 (95% CI 0.91, 1.42) | NSS |
| <b>Anticonvulsants-Pregabalin</b> | Abdominal Distention                 | Ziegler 2015     | Pregabalin 150 mg twice daily Placebo          | 1 | 132 | 0% (0/70)      | 0% (0/62)      | -                           | -   |
| <b>Anticonvulsants-Pregabalin</b> | Adverse Events                       | Guan 2011        | Pregabalin 150-600 mg daily                    | 1 | 308 | 50% (103/206)  | 40.2% (41/102) | RR 1.24 (95% CI 0.95, 1.63) | NSS |

|                                   |                 |                     |                                    |   |     |                    |                   |                                        |     |
|-----------------------------------|-----------------|---------------------|------------------------------------|---|-----|--------------------|-------------------|----------------------------------------|-----|
| <b>Anticonvulsants-Pregabalin</b> | Adverse Events  | Mu 2018             | Pregabalin 300 mg daily<br>Placebo | 1 | 620 | 36.0%<br>(113/314) | 31.8%<br>(98/308) | RR 1.13<br>(95% CI<br>0.91, 1.41)      | NSS |
| <b>Anticonvulsants-Pregabalin</b> | Adverse Events  | NCT00394901<br>2006 | Pregabalin 150 mg daily<br>Placebo | 1 | 372 | 50.6%<br>(44/87)   | 34.4%<br>(11/32)  | RR 1.47<br>(95% CI<br>0.87, 2.48)      | NSS |
| <b>Anticonvulsants-Pregabalin</b> | Adverse Events  | Rauck 2012          | Pregabalin 300 mg daily<br>Placebo | 1 | 420 | 71.2%<br>(47/66)   | 66.7%<br>(20/30)  | RR 1.07<br>(95% CI<br>0.79, 1.44)      | NSS |
| <b>Anticonvulsants-Pregabalin</b> | Anemia          | McDonnell 2018      | Pregabalin 300 mg daily<br>Placebo | 1 | 91  | 4.3%<br>(2/46)     | 0%<br>(0/45)      | RR 4.89<br>(0.24 to<br>99.19)          | NSS |
| <b>Anticonvulsants-Pregabalin</b> | Angina Pectoris | NCT00394901<br>2006 | Pregabalin 150 mg daily<br>Placebo | 1 | 372 | 0%<br>(0/87)       | 0%<br>(0/32)      | -                                      | -   |
| <b>Anticonvulsants-Pregabalin</b> | Angina Pectoris | NCT00394901<br>2006 | Pregabalin 300 mg daily<br>Placebo | 1 | 372 | 0%<br>(0/89)       | 0%<br>(0/33)      | -                                      | -   |
| <b>Anticonvulsants-Pregabalin</b> | Angina Pectoris | NCT00394901<br>2006 | Pregabalin 600 mg daily<br>Placebo | 1 | 372 | 0%<br>(0/97)       | 3.0%<br>(1/33)    | RR 0.12<br>(95% CI<br>0.00, 2.77)      | NSS |
| <b>Anticonvulsants-Pregabalin</b> | Arrhythmias     | Vinik 2014          | Pregabalin 300 mg daily<br>Placebo | 1 | 158 | 2%<br>(1/50)       | 0%<br>(0/108)     | RR 6.41<br>(95% CI<br>0.27,<br>154.70) | NSS |
| <b>Anticonvulsants-Pregabalin</b> | Arthralgia      | Rauck 2012          | Pregabalin 300 mg daily<br>Placebo | 1 | 96  | 4.5%<br>(3/66)     | 6.7%<br>(2/30)    | RR 0.68<br>(95% CI<br>0.12, 3.87)      | NSS |
| <b>Anticonvulsants-Pregabalin</b> | Asthma          | NCT00394901<br>2006 | Pregabalin 150 mg daily<br>Placebo | 1 | 372 | 0%<br>(0/87)       | 0%<br>(0/32)      | -                                      | -   |
| <b>Anticonvulsants-Pregabalin</b> | Asthma          | NCT00394901<br>2006 | Pregabalin 300 mg daily<br>Placebo | 1 | 372 | 1.1%<br>(1/89)     | 0%<br>(0/33)      | RR 1.13<br>(95% CI<br>0.05,<br>27.15)  | NSS |
| <b>Anticonvulsants-Pregabalin</b> | Asthma          | NCT00394901<br>2006 | Pregabalin 600 mg daily            | 1 | 372 | 0%<br>(0/97)       | 0%<br>(0/33)      | -                                      | -   |



|                                   |                                        |                  |                                                   |   |     |                 |                  |                                  |     |
|-----------------------------------|----------------------------------------|------------------|---------------------------------------------------|---|-----|-----------------|------------------|----------------------------------|-----|
|                                   |                                        |                  | Placebo                                           |   |     |                 |                  |                                  |     |
| <b>Anticonvulsants-Pregabalin</b> | Blood creatine phosphokinase increased | Satoh 2011       | Pregabalin 300 mg daily<br>Placebo                | 1 | 314 | 1.5%<br>(2/134) | 0%<br>(0/67)     | RR 2.52<br>(95% CI 0.12, 51.73)  | NSS |
| <b>Anticonvulsants-Pregabalin</b> | Blood creatine phosphokinase increased | Satoh 2011       | Pregabalin 600 mg daily<br>Placebo                | 1 | 314 | 4.4%<br>(2/45)  | 0%<br>(0/68)     | RR 7.50<br>(95% CI 0.37, 152.68) | NSS |
| <b>Anticonvulsants-Pregabalin</b> | Body Aches                             | Stacey 2008      | Pregabalin Flexible Dose (mean 396 mg)<br>Placebo | 1 | 269 | 2.2%<br>(2/91)  | 0%<br>(0/45)     | RR 2.50<br>(95% CI 0.12, 51.01)  | NSS |
| <b>Anticonvulsants-Pregabalin</b> | Body Aches                             | Stacey 2008      | Pregabalin Fixed Dose (mean 295 mg)<br>Placebo    | 1 | 269 | 0%<br>(0/88)    | 0%<br>(0/45)     | -                                | -   |
| <b>Anticonvulsants-Pregabalin</b> | Bronchitis                             | Rauck 2012       | Pregabalin 300 mg daily<br>Placebo                | 1 | 420 | 1.5%<br>(1/66)  | 3.3%<br>(1/30)   | RR 0.45<br>(95% CI 0.03, 7.03)   | NSS |
| <b>Anticonvulsants-Pregabalin</b> | Cardiac Conduction Abnormalities       | Vinik 2014       | Pregabalin 300 mg daily<br>Placebo                | 1 | 158 | 0%<br>(0/50)    | 0.93%<br>(1/108) | RR 0.71<br>(95% CI 0.03, 17.19)  | NSS |
| <b>Anticonvulsants-Pregabalin</b> | Cerebral infarction                    | NCT00394901 2006 | Pregabalin 150 mg daily<br>Placebo                | 1 | 372 | 0%<br>(0/87)    | 0%<br>(0/32)     | -                                | -   |
| <b>Anticonvulsants-Pregabalin</b> | Cerebral infarction                    | NCT00394901 2006 | Pregabalin 300 mg daily<br>Placebo                | 1 | 372 | 0%<br>(0/89)    | 0%<br>(0/33)     | -                                | -   |
| <b>Anticonvulsants-Pregabalin</b> | Cerebral infarction                    | NCT00394901 2006 | Pregabalin 600 mg daily<br>Placebo                | 1 | 372 | 0%<br>(0/97)    | 3.0%<br>(1/33)   | RR 0.12<br>(95% CI 0.00, 2.77)   | NSS |
| <b>Anticonvulsants-Pregabalin</b> | Completed suicide                      | NCT00394901 2006 | Pregabalin 150 mg daily<br>Placebo                | 1 | 372 | 0%<br>(0/87)    | 0%<br>(0/32)     | -                                | -   |

|                                   |                                     |                     |                                                         |   |     |                  |                |                                       |     |
|-----------------------------------|-------------------------------------|---------------------|---------------------------------------------------------|---|-----|------------------|----------------|---------------------------------------|-----|
| <b>Anticonvulsants-Pregabalin</b> | Completed suicide                   | NCT00394901<br>2006 | Pregabalin 300<br>mg daily<br>Placebo                   | 1 | 372 | 0%<br>(0/89)     | 0%<br>(0/33)   | -                                     | -   |
| <b>Anticonvulsants-Pregabalin</b> | Completed suicide                   | NCT00394901<br>2006 | Pregabalin 600<br>mg daily<br>Placebo                   | 1 | 372 | 0%<br>(0/97)     | 3.0%<br>(1/33) | RR 0.12<br>(95% CI<br>0.00, 2.77)     | NSS |
| <b>Anticonvulsants-Pregabalin</b> | Congestive Heart<br>Failure         | NCT02215252<br>2014 | Pregabalin 300<br>mg daily<br>Placebo                   | 1 | 91  | 2.2%<br>(1/46)   | 0%<br>(0/45)   | RR 2.94<br>(95% CI<br>0.12,<br>70.24) | NSS |
| <b>Anticonvulsants-Pregabalin</b> | COPD                                | NCT02215252<br>2014 | Pregabalin 300<br>mg daily<br>Placebo                   | 1 | 91  | 0%<br>(0/46)     | 0%<br>(0/45)   | -                                     | -   |
| <b>Anticonvulsants-Pregabalin</b> | Cough                               | McDonnell 2018      | Pregabalin 300<br>mg daily<br>Placebo                   | 1 | 91  | 4.3%<br>(2/46)   | 0%<br>(0/45)   | RR 4.89<br>(0.24 to<br>99.19)         | NSS |
| <b>Anticonvulsants-Pregabalin</b> | Death                               | Moon 2010           | Pregabalin 600<br>mg daily<br>Placebo                   | 1 | 240 | 0.62%<br>(1/162) | 0%<br>(0/78)   | RR 1.45<br>(95% CI<br>0.06,<br>35.29) | NSS |
| <b>Anticonvulsants-Pregabalin</b> | Depressed Level of<br>Consciousness | Stacey 2008         | Pregabalin<br>Flexible Dose<br>(mean 396 mg)<br>Placebo | 1 | 269 | 2.2%<br>(2/91)   | 0%<br>(0/45)   | RR 2.50<br>(95% CI<br>0.12,<br>51.01) | NSS |
| <b>Anticonvulsants-Pregabalin</b> | Depressed Level of<br>Consciousness | Stacey 2008         | Pregabalin<br>Fixed Dose<br>(mean 295 mg)<br>Placebo    | 1 | 269 | 1.1%<br>(1/88)   | 2.2%<br>(1/45) | RR 0.51<br>(95% CI<br>0.03, 7.99)     | NSS |
| <b>Anticonvulsants-Pregabalin</b> | Disorientation                      | Stacey 2008         | Pregabalin<br>Flexible Dose<br>(mean 396 mg)<br>Placebo | 1 | 269 | 2.2%<br>(2/91)   | 0%<br>(0/45)   | RR 2.50<br>(95% CI<br>0.12,<br>51.01) | NSS |
| <b>Anticonvulsants-Pregabalin</b> | Disorientation                      | Stacey 2008         | Pregabalin<br>Fixed Dose<br>(mean 295 mg)<br>Placebo    | 1 | 269 | 2.3%<br>(2/88)   | 0%<br>(0/45)   | RR 2.58<br>(95% CI<br>0.13,<br>52.72) | NSS |

|                                   |                    |                  |                                                |   |     |               |              |                              |     |
|-----------------------------------|--------------------|------------------|------------------------------------------------|---|-----|---------------|--------------|------------------------------|-----|
| <b>Anticonvulsants-Pregabalin</b> | ECG Result Changes | Guan 2011        | Pregabalin 150-600 mg daily                    | 1 | 308 | 1.9% (4/206)  | 2.9% (3/102) | RR 0.66 (95% CI 0.15, 2.89)  | NSS |
| <b>Anticonvulsants-Pregabalin</b> | Eczema             | NCT00394901 2006 | Pregabalin 150 mg daily Placebo                | 1 | 372 | 3.4% (3/87)   | 0% (0/32)    | RR 2.63 (95% CI 0.14, 49.46) | NSS |
| <b>Anticonvulsants-Pregabalin</b> | Eczema             | NCT00394901 2006 | Pregabalin 300 mg daily Placebo                | 1 | 372 | 0% (0/89)     | 3.0% (1/33)  | RR 0.13 (95% CI 0.01, 3.02)  | NSS |
| <b>Anticonvulsants-Pregabalin</b> | Eczema             | NCT00394901 2006 | Pregabalin 600 mg daily Placebo                | 1 | 372 | 6.2% (6/97)   | 3.0% (1/33)  | RR 2.04 (95% CI 0.26, 16.34) | NSS |
| <b>Anticonvulsants-Pregabalin</b> | Enlarged Abdomen   | Arezzo 2008      | Pregabalin 600 mg daily Placebo                | 1 | 167 | 3.7% (3/82)   | 4.7% (4/85)  | RR 0.78 (95% CI 0.18, 3.37)  | NSS |
| <b>Anticonvulsants-Pregabalin</b> | Excoriation        | Rauck 2012       | Pregabalin 300 mg daily Placebo                | 1 | 420 | 4.5% (3/66)   | 0% (0/30)    | RR 3.24 (95% CL 0.17, 60.81) | NSS |
| <b>Anticonvulsants-Pregabalin</b> | Feeling Abnormal   | Stacey 2008      | Pregabalin Flexible Dose (mean 396 mg) Placebo | 1 | 269 | 5.5% (5/91)   | 0% (0/45)    | RR 5.50 (95% CI 0.31, 97.33) | NSS |
| <b>Anticonvulsants-Pregabalin</b> | Feeling Abnormal   | Stacey 2008      | Pregabalin Fixed Dose (mean 295 mg) Placebo    | 1 | 269 | 1.1% (1/88)   | 0% (0/45)    | RR 1.55 (95% CI 0.06, 37.32) | NSS |
| <b>Anticonvulsants-Pregabalin</b> | Flu Syndrome       | Rosenstock 2004  | Pregabalin 300 mg daily Placebo                | 1 | 146 | 3.9% (3/76)   | 4.3% (3/70)  | RR 0.92 (95% CI 0.19, 4.41)  | NSS |
| <b>Anticonvulsants-Pregabalin</b> | Gait disturbance   | McDonnell 2018   | Pregabalin 300 mg daily Placebo                | 1 | 91  | 4.3% (2/46)   | 0% (0/45)    | RR 4.89 (0.24 to 99.19)      | NSS |
| <b>Anticonvulsants-Pregabalin</b> | Hot Flush          | Satoh 2011       | Pregabalin 300 mg daily                        | 1 | 314 | 0.75% (1/134) | 0% (0/67)    | RR 1.51 (95% CI              | NSS |

|                                        |                |                     |                                                         |   |     |                |                |                                       |     |
|----------------------------------------|----------------|---------------------|---------------------------------------------------------|---|-----|----------------|----------------|---------------------------------------|-----|
|                                        |                |                     | Placebo                                                 |   |     |                |                | 0.06,<br>36.61)                       |     |
| <b>Anticonvulsants-<br/>Pregabalin</b> | Hot Flush      | Satoh 2011          | Pregabalin 600<br>mg daily<br>Placebo                   | 1 | 314 | 4.4%<br>(2/45) | 1.5%<br>(1/68) | RR 3.02<br>(95% CI<br>0.28,<br>32.35) | NSS |
| <b>Anticonvulsants-<br/>Pregabalin</b> | Hyperglycemia  | Smith 2014          | Pregabalin 300<br>mg daily<br>Placebo                   | 1 | 191 | 7.1%<br>(7/98) | 2.2%<br>(2/93) | RR 3.32<br>(95% CI<br>0.71,<br>15.58) | NSS |
| <b>Anticonvulsants-<br/>Pregabalin</b> | Hypoesthesia   | Rauck 2012          | Pregabalin 300<br>mg daily<br>Placebo                   | 1 | 420 | 4.5%<br>(3/66) | 3.3%<br>(1/30) | 1.36 (95%<br>CI 0.15,<br>12.58)       | NSS |
| <b>Anticonvulsants-<br/>Pregabalin</b> | Hypotension    | NCT00394901<br>2006 | Pregabalin 150<br>mg daily<br>Placebo                   | 1 | 372 | 0%<br>(0/87)   | 0%<br>(0/32)   | -                                     | -   |
| <b>Anticonvulsants-<br/>Pregabalin</b> | Hypotension    | NCT00394901<br>2006 | Pregabalin 300<br>mg daily<br>Placebo                   | 1 | 372 | 1.1%<br>(1/89) | 0%<br>(0/33)   | RR 1.13<br>(95% CI<br>0.05,<br>27.15) | NSS |
| <b>Anticonvulsants-<br/>Pregabalin</b> | Hypotension    | NCT00394901<br>2006 | Pregabalin 600<br>mg daily<br>Placebo                   | 1 | 372 | 0%<br>(0/97)   | 0%<br>(0/33)   | -                                     | -   |
| <b>Anticonvulsants-<br/>Pregabalin</b> | Insomnia       | Ziegler 2015        | Pregabalin 150<br>mg twice daily<br>Placebo             | 1 | 132 | 2.9%<br>(2/70) | 1.6%<br>(1/62) | RR 1.77<br>(95% CI<br>0.16,<br>19.06) | NSS |
| <b>Anticonvulsants-<br/>Pregabalin</b> | Joint Swelling | Stacey 2008         | Pregabalin<br>Flexible Dose<br>(mean 396 mg)<br>Placebo | 1 | 269 | 0%<br>(0/91)   | 0%<br>(0/45)   | -                                     | -   |
| <b>Anticonvulsants-<br/>Pregabalin</b> | Joint Swelling | Stacey 2008         | Pregabalin<br>Fixed Dose<br>(mean 295 mg)<br>Placebo    | 1 | 269 | 2.3%<br>(2/88) | 2.2%<br>(1/45) | RR 1.02<br>(95% CI<br>0.10,<br>10.98) | NSS |

|                                        |                               |                     |                                                         |   |     |                  |                 |                                       |     |
|----------------------------------------|-------------------------------|---------------------|---------------------------------------------------------|---|-----|------------------|-----------------|---------------------------------------|-----|
| <b>Anticonvulsants-<br/>Pregabalin</b> | Lab Result Changes            | Guan 2011           | Pregabalin<br>150-600 mg<br>daily                       | 1 | 308 | 6.3%<br>(13/206) | 6.9%<br>(7/102) | RR 0.92<br>(95% CI<br>0.38, 2.23)     | NSS |
| <b>Anticonvulsants-<br/>Pregabalin</b> | Large Intestinal<br>Stricture | NCT00394901<br>2006 | Pregabalin 150<br>mg daily<br>Placebo                   | 1 | 372 | 0%<br>(0/87)     | 0%<br>(0/32)    | -                                     | -   |
| <b>Anticonvulsants-<br/>Pregabalin</b> | Large Intestinal<br>Stricture | NCT00394901<br>2006 | Pregabalin 300<br>mg daily<br>Placebo                   | 1 | 372 | 0%<br>(0/89)     | 0%<br>(0/33)    | -                                     | -   |
| <b>Anticonvulsants-<br/>Pregabalin</b> | Large Intestinal<br>Stricture | NCT00394901<br>2006 | Pregabalin 600<br>mg daily<br>Placebo                   | 1 | 372 | 1.0%<br>(1/97)   | 0%<br>(0/33)    | RR 1.04<br>(95% CI<br>0.04,<br>24.95) | NSS |
| <b>Anticonvulsants-<br/>Pregabalin</b> | Loss of<br>consciousness      | NCT00394901<br>2006 | Pregabalin 150<br>mg daily<br>Placebo                   | 1 | 372 | 0%<br>(0/87)     | 0%<br>(0/32)    | -                                     | -   |
| <b>Anticonvulsants-<br/>Pregabalin</b> | Loss of<br>consciousness      | NCT00394901<br>2006 | Pregabalin 300<br>mg daily<br>Placebo                   | 1 | 372 | 0%<br>(0/89)     | 0%<br>(0/33)    | -                                     | -   |
| <b>Anticonvulsants-<br/>Pregabalin</b> | Loss of<br>consciousness      | NCT00394901<br>2006 | Pregabalin 600<br>mg daily<br>Placebo                   | 1 | 372 | 0%<br>(0/97)     | 3.0%<br>(1/33)  | RR 0.12<br>(95% CI<br>0.00, 2.77)     | NSS |
| <b>Anticonvulsants-<br/>Pregabalin</b> | Memory<br>Impairment          | Stacey 2008         | Pregabalin<br>Flexible Dose<br>(mean 396 mg)<br>Placebo | 1 | 269 | 3.3%<br>(3/91)   | 0%<br>(0/45)    | RR 3.50<br>(95% CI<br>0.18,<br>66.34) | NSS |
| <b>Anticonvulsants-<br/>Pregabalin</b> | Memory<br>Impairment          | Stacey 2008         | Pregabalin<br>Fixed Dose<br>(mean 295 mg)<br>Placebo    | 1 | 269 | 0%<br>(0/88)     | 0%<br>(0/45)    | -                                     | -   |
| <b>Anticonvulsants-<br/>Pregabalin</b> | Muscle spasms                 | McDonnell 2018      | Pregabalin 300<br>mg daily<br>Placebo                   | 1 | 91  | 2.2%<br>(1/46)   | 4.4%<br>(2/45)  | RR 0.49<br>(0.05 to<br>5.21)          | NSS |
| <b>Anticonvulsants-<br/>Pregabalin</b> | Muscular<br>Weakness          | Satoh 2011          | Pregabalin 300<br>mg daily<br>Placebo                   | 1 | 314 | 0%<br>(0/134)    | 0%<br>(0/67)    | -                                     | -   |

|                                   |                       |                     |                                    |   |     |                |                |                                  |     |
|-----------------------------------|-----------------------|---------------------|------------------------------------|---|-----|----------------|----------------|----------------------------------|-----|
| <b>Anticonvulsants-Pregabalin</b> | Muscular Weakness     | Satoh 2011          | Pregabalin 600 mg daily<br>Placebo | 1 | 314 | 4.4%<br>(2/45) | 0%<br>(0/68)   | RR 7.50<br>(95% CI 0.37, 152.68) | NSS |
| <b>Anticonvulsants-Pregabalin</b> | Myalgia               | McDonnell 2018      | Pregabalin 300 mg daily<br>Placebo | 1 | 91  | 4.3%<br>(2/46) | 0%<br>(0/45)   | RR 4.89<br>(0.24 to 99.19)       | NSS |
| <b>Anticonvulsants-Pregabalin</b> | Myocardial Infarction | NCT00394901<br>2006 | Pregabalin 150 mg daily<br>Placebo | 1 | 372 | 1.1%<br>(1/87) | 0%<br>(0/32)   | RR 1.13<br>(95% CI 0.05, 26.93)  | NSS |
| <b>Anticonvulsants-Pregabalin</b> | Myocardial Infarction | NCT00394901<br>2006 | Pregabalin 300 mg daily<br>Placebo | 1 | 372 | 0%<br>(0/89)   | 0%<br>(0/33)   | -                                | -   |
| <b>Anticonvulsants-Pregabalin</b> | Myocardial Infarction | NCT00394901<br>2006 | Pregabalin 600 mg daily<br>Placebo | 1 | 372 | 0%<br>(0/97)   | 0%<br>(0/33)   | -                                | -   |
| <b>Anticonvulsants-Pregabalin</b> | Neuropathy            | Lesser 2004         | Pregabalin 75 mg daily<br>Placebo  | 1 | 337 | 9.1%<br>(7/77) | 6.3%<br>(2/32) | RR 1.45<br>(95% CI 0.32, 6.63)   | NSS |
| <b>Anticonvulsants-Pregabalin</b> | Neuropathy            | Lesser 2004         | Pregabalin 300 mg daily<br>Placebo | 1 | 337 | 8.6%<br>(7/81) | 9.4%<br>(3/32) | RR 0.92<br>(95% CI 0.25, 3.35)   | NSS |
| <b>Anticonvulsants-Pregabalin</b> | Neuropathy            | Lesser 2004         | Pregabalin 600 mg daily<br>Placebo | 1 | 337 | 8.5%<br>(7/82) | 9.1%<br>(3/33) | RR 0.94<br>(95% CI 0.26, 3.41)   | NSS |
| <b>Anticonvulsants-Pregabalin</b> | Pain in Extremity     | Rauck 2012          | Pregabalin 300 mg daily<br>Placebo | 1 | 420 | 3.0%<br>(2/66) | 3.3%<br>(1/30) | RR 0.91<br>(95% CI 0.09, 9.64)   | NSS |
| <b>Anticonvulsants-Pregabalin</b> | Paresthesia           | Rauck 2012          | Pregabalin 300 mg daily<br>Placebo | 1 | 420 | 4.5%<br>(3/66) | 0%<br>(0/30)   | RR 3.24<br>(95% CL 0.17, 60.81)  | NSS |
| <b>Anticonvulsants-Pregabalin</b> | Pneumonia             | NCT02215252<br>2014 | Pregabalin 300 mg daily<br>Placebo | 1 | 91  | 0%<br>(0/46)   | 0%<br>(0/45)   | -                                | -   |

|                                   |                                 |                     |                                             |   |     |                   |                 |                                        |     |
|-----------------------------------|---------------------------------|---------------------|---------------------------------------------|---|-----|-------------------|-----------------|----------------------------------------|-----|
| <b>Anticonvulsants-Pregabalin</b> | Prostate cancer                 | NCT00394901<br>2006 | Pregabalin 150<br>mg daily<br>Placebo       | 1 | 372 | 0%<br>(0/87)      | 0%<br>(0/32)    | -                                      | -   |
| <b>Anticonvulsants-Pregabalin</b> | Prostate cancer                 | NCT00394901<br>2006 | Pregabalin 300<br>mg daily<br>Placebo       | 1 | 372 | 0%<br>(0/89)      | 0%<br>(0/33)    | -                                      | -   |
| <b>Anticonvulsants-Pregabalin</b> | Prostate cancer                 | NCT00394901<br>2006 | Pregabalin 600<br>mg daily<br>Placebo       | 1 | 372 | 0%<br>(0/97)      | 3.0%<br>(1/33)  | RR 0.12<br>(95% CI<br>0.00, 2.77)      | NSS |
| <b>Anticonvulsants-Pregabalin</b> | Pruritus                        | Liu 2017            | Pregabalin 300<br>mg daily<br>Placebo       | 1 | 220 | 0.90%<br>(1/111)  | 4.6%<br>(5/109) | RR 0.20<br>(95% CI<br>0.02, 1.65)      | NSS |
| <b>Anticonvulsants-Pregabalin</b> | Rash                            | Ziegler 2015        | Pregabalin 150<br>mg twice daily<br>Placebo | 1 | 132 | 0%<br>(0/70)      | 1.6%<br>(1/62)  | RR 0.30<br>(95% CI<br>0.01, 7.13)      | NSS |
| <b>Anticonvulsants-Pregabalin</b> | Severe Adverse<br>Events        | Tolle 2008          | Pregabalin 150<br>mg daily<br>Placebo       | 1 | 395 | 6.1%<br>(6/99)    | 3.1%<br>(1/32)  | RR 1.94<br>(95% CI<br>0.24,<br>15.51)  | NSS |
| <b>Anticonvulsants-Pregabalin</b> | Severe Adverse<br>Events        | Tolle 2008          | Pregabalin 300<br>mg daily<br>Placebo       | 1 | 395 | 8.1%<br>(8/99)    | 0%<br>(0/32)    | RR 5.61<br>(95% CI<br>0.33,<br>94.58)  | NSS |
| <b>Anticonvulsants-Pregabalin</b> | Severe Adverse<br>Events        | Tolle 2008          | Pregabalin 600<br>mg daily<br>Placebo       | 1 | 395 | 10.9%<br>(11/101) | 0%<br>(0/32)    | RR 7.44<br>(95% CI<br>0.45,<br>122.87) | NSS |
| <b>Anticonvulsants-Pregabalin</b> | Small intestinal<br>obstruction | NCT00394901<br>2006 | Pregabalin 150<br>mg daily<br>Placebo       | 1 | 372 | 1.1%<br>(1/87)    | 0%<br>(0/32)    | RR 1.13<br>(95% CI<br>0.05,<br>26.93)  | NSS |
| <b>Anticonvulsants-Pregabalin</b> | Small intestinal<br>obstruction | NCT00394901<br>2006 | Pregabalin 300<br>mg daily<br>Placebo       | 1 | 372 | 0%<br>(0/89)      | 0%<br>(0/33)    | -                                      | -   |
| <b>Anticonvulsants-Pregabalin</b> | Small intestinal<br>obstruction | NCT00394901<br>2006 | Pregabalin 600<br>mg daily                  | 1 | 372 | 0%<br>(0/97)      | 0%<br>(0/33)    | -                                      | -   |

|                                   |                                   |                  |                                          |   |     |                  |                  |                                   |     |
|-----------------------------------|-----------------------------------|------------------|------------------------------------------|---|-----|------------------|------------------|-----------------------------------|-----|
|                                   |                                   |                  | Placebo                                  |   |     |                  |                  |                                   |     |
| <b>Anticonvulsants-Pregabalin</b> | Speech Disorder                   | Dworkin 2003     | Pregabalin 300-600 mg daily<br>Placebo   | 1 | 173 | 5.6%<br>(5/89)   | 0%<br>(0/84)     | RR 10.39<br>(95% CI 0.58, 185.05) | NSS |
| <b>Anticonvulsants-Pregabalin</b> | Subdural haematoma                | NCT00394901 2006 | Pregabalin 150 mg daily<br>Placebo       | 1 | 372 | 0%<br>(0/87)     | 0%<br>(0/32)     | -                                 | -   |
| <b>Anticonvulsants-Pregabalin</b> | Subdural haematoma                | NCT00394901 2006 | Pregabalin 300 mg daily<br>Placebo       | 1 | 372 | 1.1%<br>(1/89)   | 0%<br>(0/33)     | RR 1.13<br>(95% CI 0.05, 27.15)   | NSS |
| <b>Anticonvulsants-Pregabalin</b> | Subdural haematoma                | NCT00394901 2006 | Pregabalin 600 mg daily<br>Placebo       | 1 | 372 | 0%<br>(0/97)     | 3.0%<br>(1/33)   | RR 0.12<br>(95% CI 0.00, 2.77)    | NSS |
| <b>Anticonvulsants-Pregabalin</b> | Thirst                            | NCT00394901 2006 | Pregabalin 150 mg daily<br>Placebo       | 1 | 372 | 3.4%<br>(3/87)   | 3.1%<br>(1/32)   | RR 1.10<br>(95% CI 0.12, 10.23)   | NSS |
| <b>Anticonvulsants-Pregabalin</b> | Thirst                            | NCT00394901 2006 | Pregabalin 300 mg daily<br>Placebo       | 1 | 372 | 7.9%<br>(7/89)   | 3.0%<br>(1/33)   | RR 2.60<br>(95% CI 0.33, 20.30)   | NSS |
| <b>Anticonvulsants-Pregabalin</b> | Thirst                            | NCT00394901 2006 | Pregabalin 600 mg daily<br>Placebo       | 1 | 372 | 7.2%<br>(7/97)   | 3.0%<br>(1/33)   | RR 2.38<br>(95% CI 0.30, 18.64)   | NSS |
| <b>Anticonvulsants-Pregabalin</b> | Treatment-emergent adverse events | NCT02215252 2014 | Pregabalin 300 mg daily<br>Placebo       | 1 | 91  | 52.2%<br>(24/46) | 37.8%<br>(17/45) | RR 1.38<br>(95% CI 0.87, 2.20)    | NSS |
| <b>Anticonvulsants-Pregabalin</b> | Treatment-emergent adverse events | Smith 2014       | Pregabalin 300 mg daily<br>Placebo       | 1 | 191 | 62.2%<br>(61/98) | 64.5%<br>(60/93) | RR 0.96<br>(95% CI 0.78, 1.20)    | NSS |
| <b>Anticonvulsants-Pregabalin</b> | Treatment-emergent Adverse Events | Ziegler 2015     | Pregabalin 150 mg twice daily<br>Placebo | 1 | 132 | 54.3%<br>(38/70) | 54.8%<br>(34/62) | RR 0.99<br>(95% CI 0.72, 1.35)    | NSS |



|                                        |                       |                     |                                                   |   |     |                   |                 |                                 |     |
|----------------------------------------|-----------------------|---------------------|---------------------------------------------------|---|-----|-------------------|-----------------|---------------------------------|-----|
| <b>Anticonvulsants-<br/>Pregabalin</b> | Tremor                | Stacey 2008         | Pregabalin Flexible Dose (mean 396 mg)<br>Placebo | 1 | 269 | 3.3%<br>(3/91)    | 0%<br>(0/45)    | RR 3.50<br>(95% CI 0.18, 66.34) | NSS |
| <b>Anticonvulsants-<br/>Pregabalin</b> | Tremor                | Stacey 2008         | Pregabalin Fixed Dose (mean 295 mg)<br>Placebo    | 1 | 269 | 1.1%<br>(1/88)    | 0%<br>(0/45)    | RR 1.55<br>(95% CI 0.06, 37.32) | NSS |
| <b>Anticonvulsants-<br/>Pregabalin</b> | Viral Gastroenteritis | Ziegler 2015        | Pregabalin 150 mg twice daily<br>Placebo          | 1 | 132 | 0%<br>(0/70)      | 0%<br>(0/62)    | -                               | -   |
| <b>Anticonvulsants-<br/>Pregabalin</b> | Visual Disturbance    | Stacey 2008         | Pregabalin Flexible Dose (mean 396 mg)<br>Placebo | 1 | 269 | 4.4%<br>(4/91)    | 0%<br>(0/45)    | RR 4.50<br>(95% CI 0.25, 81.81) | NSS |
| <b>Anticonvulsants-<br/>Pregabalin</b> | Visual Disturbance    | Stacey 2008         | Pregabalin Fixed Dose (mean 295 mg)<br>Placebo    | 1 | 269 | 0%<br>(0/88)      | 0%<br>(0/45)    | -                               | -   |
| <b>Anticonvulsants-<br/>Pregabalin</b> | Vulvovaginal Pruritus | NCT02215252<br>2014 | Pregabalin 300 mg daily<br>Placebo                | 1 | 91  | 5.3%<br>(1/19)    | 0%<br>(0/14)    | RR 2.25<br>(95% CI 0.10, 51.46) | NSS |
| <b>Anticonvulsants-<br/>Pregabalin</b> | Weight Change         | Tolle 2008          | Pregabalin 150 mg daily<br>Placebo                | 1 | 395 | 6.1%<br>(6/99)    | 0%<br>(0/32)    | RR 4.29<br>(95% CI 0.25, 74.12) | NSS |
| <b>Anticonvulsants-<br/>Pregabalin</b> | Weight Change         | Tolle 2008          | Pregabalin 300 mg daily<br>Placebo                | 1 | 395 | 6.1%<br>(6/99)    | 0%<br>(0/32)    | RR 4.29<br>(95% CI 0.25, 74.12) | NSS |
| <b>Anticonvulsants-<br/>Pregabalin</b> | Weight Change         | Tolle 2008          | Pregabalin 600 mg daily<br>Placebo                | 1 | 395 | 6.9%<br>(7/101)   | 0%<br>(0/32)    | RR 4.85<br>(95% CI 0.28, 82.71) | NSS |
| <b>Anticonvulsants-<br/>Topiramate</b> | Diarrhea              | Raskin 2004         | Topiramate 400 mg                                 | 1 | 323 | 11.2%<br>(24/214) | 3.7%<br>(4/109) | RR 3.06<br>(95% CI              | 14  |

|                                   |                          |             |                              |   |     |                    |                  |                                  |     |
|-----------------------------------|--------------------------|-------------|------------------------------|---|-----|--------------------|------------------|----------------------------------|-----|
|                                   |                          |             | Placebo                      |   |     |                    |                  | 1.09, 8.59)                      |     |
| <b>Anticonvulsants-Topiramate</b> | Loss of Appetite         | Raskin 2004 | Topiramate 400 mg<br>Placebo | 1 | 323 | 10.7%<br>(23/214)  | 0.92%<br>(1/109) | RR 11.72<br>(95% CI 1.60, 85.60) | 11  |
| <b>Anticonvulsants-Topiramate</b> | Paresthesia              | Raskin 2004 | Topiramate 400 mg<br>Placebo | 1 | 323 | 8.4%<br>(18/214)   | 1.8%<br>(2/109)  | RR 4.58<br>(95% CI 1.08, 19.40)  | 16  |
| <b>Anticonvulsants-Topiramate</b> | Weight loss 0-5%         | Raskin 2004 | Topiramate 400 mg<br>Placebo | 1 | 323 | 52.6%<br>(111/211) | 38.8%<br>(31/80) | RR 1.36<br>(95% CI 1.00, 1.84)   | 8   |
| <b>Anticonvulsants-Topiramate</b> | Weight loss 5-10%        | Raskin 2004 | Topiramate 400 mg<br>Placebo | 1 | 323 | 21.8%<br>(46/211)  | 5%<br>(4/80)     | RR 4.36<br>(95% CI 1.62, 11.72)  | 6   |
| <b>Anticonvulsants-Topiramate</b> | Arthralgia               | Raskin 2004 | Topiramate 400 mg<br>Placebo | 1 | 323 | 3.7%<br>(8/214)    | 5.5%<br>(6/109)  | RR 0.68<br>(95% CI 0.24, 1.91)   | NSS |
| <b>Anticonvulsants-Topiramate</b> | Difficulty concentrating | Raskin 2004 | Topiramate 400 mg<br>Placebo | 1 | 323 | 5.1%<br>(11/214)   | 0.92%<br>(1/109) | RR 5.60<br>(95% CI 0.73, 42.84)  | NSS |
| <b>Anticonvulsants-Topiramate</b> | Dizziness                | Raskin 2004 | Topiramate 400 mg<br>Placebo | 1 | 323 | 7.0%<br>(15/214)   | 5.5%<br>(6/109)  | RR 1.27<br>(95% CI 0.51, 3.19)   | NSS |
| <b>Anticonvulsants-Topiramate</b> | Fatigue                  | Raskin 2004 | Topiramate 400 mg<br>Placebo | 1 | 323 | 7.0%<br>(15/214)   | 1.8%<br>(2/109)  | RR 3.82<br>(95% CI 0.89, 16.40)  | NSS |
| <b>Anticonvulsants-Topiramate</b> | Headache                 | Raskin 2004 | Topiramate 400 mg<br>Placebo | 1 | 323 | 5.6%<br>(12/214)   | 9.2%<br>(10/109) | RR 0.61<br>(95% CI 0.27, 1.37)   | NSS |
| <b>Anticonvulsants-Topiramate</b> | Injury                   | Raskin 2004 | Topiramate 400 mg<br>Placebo | 1 | 323 | 3.7%<br>(8/214)    | 7.3%<br>(8/109)  | RR 0.51<br>(95% CI 0.20, 1.32)   | NSS |

|                                   |                                   |              |                                                   |   |     |                   |                   |                                      |     |
|-----------------------------------|-----------------------------------|--------------|---------------------------------------------------|---|-----|-------------------|-------------------|--------------------------------------|-----|
| <b>Anticonvulsants-Topiramate</b> | Markedly severe adverse events    | Raskin 2004  | Topiramate 400 mg<br>Placebo                      | 1 | 323 | 15.0%<br>(32/214) | 11.0%<br>(12/109) | RR 1.36<br>(95% CI<br>0.73, 2.53)    | NSS |
| <b>Anticonvulsants-Topiramate</b> | Nausea                            | Raskin 2004  | Topiramate 400 mg<br>Placebo                      | 1 | 323 | 9.3%<br>(20/214)  | 5.5%<br>(6/109)   | RR 1.70<br>(95% CI<br>0.70, 4.10)    | NSS |
| <b>Anticonvulsants-Topiramate</b> | Pain                              | Raskin 2004  | Topiramate 400 mg<br>Placebo                      | 1 | 323 | 1.9%<br>(4/214)   | 6.4%<br>(7/109)   | RR 0.29<br>(95% CI<br>0.09, 0.97)    | NSS |
| <b>Anticonvulsants-Topiramate</b> | Serious adverse events            | Raskin 2004  | Topiramate 400 mg<br>Placebo                      | 1 | 323 | 4.7%<br>(10/214)  | 5.5%<br>(6/109)   | RR 0.85<br>(95% CI<br>0.32, 2.27)    | NSS |
| <b>Anticonvulsants-Topiramate</b> | Sinusitis                         | Raskin 2004  | Topiramate 400 mg<br>Placebo                      | 1 | 323 | 6.1%<br>(13/214)  | 5.5%<br>(6/109)   | RR 1.10<br>(95% CI<br>0.43, 2.82)    | NSS |
| <b>Anticonvulsants-Topiramate</b> | Somnolence                        | Raskin 2004  | Topiramate 400 mg<br>Placebo                      | 1 | 323 | 9.8%<br>(21/214)  | 3.7%<br>(4/109)   | RR 2.67<br>(95% CI<br>0.94, 7.60)    | NSS |
| <b>Anticonvulsants-Topiramate</b> | Taste Change                      | Raskin 2004  | Topiramate 400 mg<br>Placebo                      | 1 | 323 | 6.5%<br>(14/214)  | 0%<br>(0/109)     | RR 14.84<br>(95% CI<br>0.89, 246.41) | NSS |
| <b>Anticonvulsants-Topiramate</b> | Upper Respiratory Tract Infection | Raskin 2004  | Topiramate 400 mg<br>Placebo                      | 1 | 323 | 8.9%<br>(19/214)  | 5.5%<br>(6/109)   | RR 1.61<br>(95% CI<br>0.66, 3.92)    | NSS |
| <b>Anticonvulsants-Topiramate</b> | Weight Increased                  | Raskin 2004  | Topiramate 400 mg<br>Placebo                      | 1 | 323 | 16.6%<br>(35/211) | 55%<br>(44/80)    | RR 0.30<br>(95% CI<br>0.21, 0.43)    | NSS |
| <b>Anticonvulsants-Topiramate</b> | Weight loss 10-20%                | Raskin 2004  | Topiramate 400 mg<br>Placebo                      | 1 | 323 | 1.9%<br>(4/211)   | 0%<br>(0/80)      | RR 3.44<br>(95% CI<br>0.19, 63.16)   | NSS |
| <b>Opioids</b>                    | Any adverse event                 | Simpson 2016 | Buprenorphine Patch 5-40 mg/hour<br>Placebo Patch | 1 | 186 | 93.5%<br>(87/93)  | 81.7%<br>(76/93)  | RR 1.14<br>(95% CI<br>1.03, 1.28)    | 9   |

|                |                                    |                      |                                             |   |     |                   |                   |                                       |     |
|----------------|------------------------------------|----------------------|---------------------------------------------|---|-----|-------------------|-------------------|---------------------------------------|-----|
| <b>Opioids</b> | Infections and Infestations        | Hanna 2008           | Oxycodone 10-80 mg daily<br>Placebo         | 1 | 338 | 29.6%<br>(50/169) | 17.8%<br>(30/169) | RR 1.67<br>(95% CI<br>1.12, 2.48)     | 9   |
| <b>Opioids</b> | Metabolism and Nutrition Disorders | Hanna 2008           | Oxycodone 10-80 mg daily<br>Placebo         | 1 | 338 | 8.9%<br>(15/169)  | 2.4%<br>(4/169)   | RR 3.75<br>(95% CI<br>1.27,<br>11.07) | 16  |
| <b>Opioids</b> | Psychiatric Disorders              | Hanna 2008           | Oxycodone 10-80 mg daily<br>Placebo         | 1 | 338 | 17.2%<br>(29/169) | 9.5%<br>(16/169)  | RR 1.81<br>(95% CI<br>1.02, 3.21)     | 13  |
| <b>Opioids</b> | Skin and Subcutaneous Disorders    | Hanna 2008           | Oxycodone 10-80 mg daily<br>Placebo         | 1 | 338 | 20.1%<br>(34/169) | 11.2%<br>(19/169) | RR 1.79<br>(95% CI<br>1.06, 3.01)     | 12  |
| <b>Opioids</b> | Abdominal Discomfort               | NCTT01124617<br>2010 | Tapentadol 25-250 mg twice daily<br>Placebo | 1 | 91  | 6.7%<br>(4/60)    | 3.2%<br>(1/31)    | RR 2.07<br>(95% CI<br>0.24,<br>17.71) | NSS |
| <b>Opioids</b> | Abdominal Distension               | NCTT01124617<br>2010 | Tapentadol 25-250 mg twice daily<br>Placebo | 1 | 91  | 0%<br>(0/60)      | 3.2%<br>(1/31)    | RR 0.17<br>(95% CI<br>0.01, 4.17)     | NSS |
| <b>Opioids</b> | Abnormal Hepatic Function          | NCTT01124617<br>2010 | Tapentadol 25-250 mg twice daily<br>Placebo | 1 | 91  | 1.7%<br>(1/60)    | 3.2%<br>(1/31)    | RR 0.52<br>(95% CI<br>0.03, 7.98)     | NSS |
| <b>Opioids</b> | Abnormal Liver Function Test       | NCTT01124617<br>2010 | Tapentadol 25-250 mg twice daily<br>Placebo | 1 | 91  | 3.3%<br>(2/60)    | 3.2%<br>(1/31)    | RR 1.03<br>(95% CI<br>0.10,<br>10.96) | NSS |
| <b>Opioids</b> | Anaemia                            | NCTT01124617<br>2010 | Tapentadol 25-250 mg twice daily<br>Placebo | 1 | 91  | 0%<br>(0/60)      | 3.2%<br>(1/31)    | RR 0.17<br>(95% CI<br>0.01, 4.17)     | NSS |
| <b>Opioids</b> | Angina Pectoris (SAE)              | NCTT01124617<br>2010 | Tapentadol 25-250 mg twice daily<br>Placebo | 1 | 91  | 1.7%<br>(1/60)    | 0%<br>(0/31)      | RR 1.57<br>(95% CI<br>0.07,<br>37.54) | NSS |

|                |                                            |                      |                                                    |   |     |                  |                 |                                       |     |
|----------------|--------------------------------------------|----------------------|----------------------------------------------------|---|-----|------------------|-----------------|---------------------------------------|-----|
| <b>Opioids</b> | Anxiety                                    | NCTT01124617<br>2010 | Tapentadol 25-<br>250 mg twice<br>daily<br>Placebo | 1 | 91  | 1.7%<br>(1/60)   | 0%<br>(0/31)    | RR 1.57<br>(95% CI<br>0.07,<br>37.54) | NSS |
| <b>Opioids</b> | Autonomic Nervous<br>System Imbalance      | NCTT01124617<br>2010 | Tapentadol 25-<br>250 mg twice<br>daily<br>Placebo | 1 | 91  | 1.7%<br>(1/60)   | 0%<br>(0/31)    | RR 1.57<br>(95% CI<br>0.07,<br>37.54) | NSS |
| <b>Opioids</b> | Back Pain                                  | NCTT01124617<br>2010 | Tapentadol 25-<br>250 mg twice<br>daily<br>Placebo | 1 | 91  | 0%<br>(0/60)     | 3.2%<br>(1/31)  | RR 0.17<br>(95% CI<br>0.01, 4.17)     | NSS |
| <b>Opioids</b> | Blood and<br>Lymphatic System<br>Disorders | Hanna 2008           | Oxycodone 10-<br>80 mg daily<br>Placebo            | 1 | 338 | 0.59%<br>(1/169) | 1.8%<br>(3/169) | RR 0.33<br>(95% CI<br>0.04, 3.17)     | NSS |
| <b>Opioids</b> | Blood Urine<br>Present                     | NCTT01124617<br>2010 | Tapentadol 25-<br>250 mg twice<br>daily<br>Placebo | 1 | 91  | 5%<br>(3/60)     | 0%<br>(0/31)    | RR 3.67<br>(95% CI<br>0.20,<br>68.92) | NSS |
| <b>Opioids</b> | Cardiac Disorders                          | Hanna 2008           | Oxycodone 10-<br>80 mg daily<br>Placebo            | 1 | 338 | 3.6%<br>(6/169)  | 2.4%<br>(4/169) | RR 1.50<br>(95% CI<br>0.43, 5.22)     | NSS |
| <b>Opioids</b> | Chalazion                                  | NCTT01124617<br>2010 | Tapentadol 25-<br>250 mg twice<br>daily<br>Placebo | 1 | 91  | 0%<br>(0/60)     | 3.2%<br>(1/31)  | RR 0.17<br>(95% CI<br>0.01, 4.17)     | NSS |
| <b>Opioids</b> | Chest Pain                                 | NCTT01124617<br>2010 | Tapentadol 25-<br>250 mg twice<br>daily<br>Placebo | 1 | 91  | 1.7%<br>(1/60)   | 0%<br>(0/31)    | RR 1.57<br>(95% CI<br>0.07,<br>37.54) | NSS |
| <b>Opioids</b> | Cystitis                                   | NCTT01124617<br>2010 | Tapentadol 25-<br>250 mg twice<br>daily<br>Placebo | 1 | 91  | 0%<br>(0/60)     | 3.2%<br>(1/31)  | RR 0.17<br>(95% CI<br>0.01, 4.17)     | NSS |
| <b>Opioids</b> | Decreased Appetite                         | NCTT01124617<br>2010 | Tapentadol 25-<br>250 mg twice<br>daily            | 1 | 91  | 15%<br>(9/60)    | 3.2%<br>(1/31)  | RR 4.65<br>(95% CI                    | NSS |

|                |                                 |                   |                                             |   |    |             |             |                               |     |
|----------------|---------------------------------|-------------------|---------------------------------------------|---|----|-------------|-------------|-------------------------------|-----|
|                |                                 |                   | Placebo                                     |   |    |             |             | 0.62, 35.05)                  |     |
| <b>Opioids</b> | Decreased Lymphocyte Percentage | NCTT01124617 2010 | Tapentadol 25-250 mg twice daily<br>Placebo | 1 | 91 | 1.7% (1/60) | 0% (0/31)   | RR 1.57 (95% CI 0.07, 37.54)  | NSS |
| <b>Opioids</b> | Dehydration                     | NCTT01124617 2010 | Tapentadol 25-250 mg twice daily<br>Placebo | 1 | 91 | 0% (0/60)   | 3.2% (1/31) | RR 0.17 (95% CI 0.01, 4.17)   | NSS |
| <b>Opioids</b> | Delirium (SAE)                  | NCTT01124617 2010 | Tapentadol 25-250 mg twice daily<br>Placebo | 1 | 91 | 1.7% (1/60) | 0% (0/31)   | RR 1.57 (95% CI 0.07, 37.54)  | NSS |
| <b>Opioids</b> | Depression                      | NCTT01124617 2010 | Tapentadol 25-250 mg twice daily<br>Placebo | 1 | 91 | 1.7% (1/60) | 0% (0/31)   | RR 1.57 (95% CI 0.07, 37.54)  | NSS |
| <b>Opioids</b> | Dermatitis                      | NCTT01124617 2010 | Tapentadol 25-250 mg twice daily<br>Placebo | 1 | 91 | 1.7% (1/60) | 0% (0/31)   | RR 1.57 (95% CI 0.07, 37.54)  | NSS |
| <b>Opioids</b> | Diabetic Retinopathy            | NCTT01124617 2010 | Tapentadol 25-250 mg twice daily<br>Placebo | 1 | 91 | 1.7% (1/60) | 0% (0/31)   | RR 1.57 (95% CI 0.07, 37.54)  | NSS |
| <b>Opioids</b> | Diabetic Ulcer (SAE)            | NCTT01124617 2010 | Tapentadol 25-250 mg twice daily<br>Placebo | 1 | 91 | 0% (0/60)   | 3.2% (1/31) | RR 0.17 (95% CI 0.01, 4.17)   | NSS |
| <b>Opioids</b> | Drug Withdrawal Syndrome        | NCTT01124617 2010 | Tapentadol 25-250 mg twice daily<br>Placebo | 1 | 91 | 8.3% (5/60) | 0% (0/31)   | RR 5.77 (95% CI 0.33, 101.10) | NSS |
| <b>Opioids</b> | Drug Withdrawal Syndrome (SAE)  | NCTT01124617 2010 | Tapentadol 25-250 mg twice daily            | 1 | 91 | 1.7% (1/60) | 0% (0/31)   | RR 1.57 (95% CI               | NSS |

|                |                                |                      |                                                    |   |     |                  |                 |                                       |     |
|----------------|--------------------------------|----------------------|----------------------------------------------------|---|-----|------------------|-----------------|---------------------------------------|-----|
|                |                                |                      | Placebo                                            |   |     |                  |                 | 0.07,<br>37.54)                       |     |
| <b>Opioids</b> | Dyspnoea                       | NCTT01124617<br>2010 | Tapentadol 25-<br>250 mg twice<br>daily<br>Placebo | 1 | 91  | 1.7%<br>(1/60)   | 0%<br>(0/31)    | RR 1.57<br>(95% CI<br>0.07,<br>37.54) | NSS |
| <b>Opioids</b> | Dysuria                        | NCTT01124617<br>2010 | Tapentadol 25-<br>250 mg twice<br>daily<br>Placebo | 1 | 91  | 1.7%<br>(1/60)   | 0%<br>(0/31)    | RR 1.57<br>(95% CI<br>0.07,<br>37.54) | NSS |
| <b>Opioids</b> | Ear and Labyrinth<br>Disorders | Hanna 2008           | Oxycodone 10-<br>80 mg daily<br>Placebo            | 1 | 338 | 7.7%<br>(13/169) | 4.1%<br>(7/169) | RR 1.86<br>(95% CI<br>0.76, 4.54)     | NSS |
| <b>Opioids</b> | ECG ST Segment<br>Depression   | NCTT01124617<br>2010 | Tapentadol 25-<br>250 mg twice<br>daily<br>Placebo | 1 | 91  | 1.7%<br>(1/60)   | 0%<br>(0/31)    | RR 1.57<br>(95% CI<br>0.07,<br>37.54) | NSS |
| <b>Opioids</b> | Eczema                         | NCTT01124617<br>2010 | Tapentadol 25-<br>250 mg twice<br>daily<br>Placebo | 1 | 91  | 3.3%<br>(2/60)   | 0%<br>(0/31)    | RR 2.62<br>(95% CI<br>0.13,<br>53.01) | NSS |
| <b>Opioids</b> | Erythema                       | NCTT01124617<br>2010 | Tapentadol 25-<br>250 mg twice<br>daily<br>Placebo | 1 | 91  | 3.3%<br>(2/60)   | 0%<br>(0/31)    | RR 2.62<br>(95% CI<br>0.13,<br>53.01) | NSS |
| <b>Opioids</b> | Eye Disorders                  | Hanna 2008           | Oxycodone 10-<br>80 mg daily<br>Placebo            | 1 | 338 | 4.7%<br>(8/169)  | 1.2%<br>(2/169) | RR 4.00<br>(95% CI<br>0.86,<br>18.56) | NSS |
| <b>Opioids</b> | Facet Joint<br>Syndrome        | NCTT01124617<br>2010 | Tapentadol 25-<br>250 mg twice<br>daily<br>Placebo | 1 | 91  | 1.7%<br>(1/60)   | 0%<br>(0/31)    | RR 1.57<br>(95% CI<br>0.07,<br>37.54) | NSS |
| <b>Opioids</b> | Fall                           | NCTT01124617<br>2010 | Tapentadol 25-<br>250 mg twice<br>daily<br>Placebo | 1 | 91  | 1.7%<br>(1/60)   | 0%<br>(0/31)    | RR 1.57<br>(95% CI<br>0.07,<br>37.54) | NSS |

|                |                            |                      |                                                    |   |     |                |                  |                                        |     |
|----------------|----------------------------|----------------------|----------------------------------------------------|---|-----|----------------|------------------|----------------------------------------|-----|
| <b>Opioids</b> | Feeling Abnormal           | NCTT01124617<br>2010 | Tapentadol 25-<br>250 mg twice<br>daily<br>Placebo | 1 | 91  | 1.7%<br>(1/60) | 0%<br>(0/31)     | RR 1.57<br>(95% CI<br>0.07,<br>37.54)  | NSS |
| <b>Opioids</b> | Feeling Hot                | NCTT01124617<br>2010 | Tapentadol 25-<br>250 mg twice<br>daily<br>Placebo | 1 | 91  | 1.7%<br>(1/60) | 0%<br>(0/31)     | RR 1.57<br>(95% CI<br>0.07,<br>37.54)  | NSS |
| <b>Opioids</b> | Gastritis                  | NCTT01124617<br>2010 | Tapentadol 25-<br>250 mg twice<br>daily<br>Placebo | 1 | 91  | 1.7%<br>(1/60) | 0%<br>(0/31)     | RR 1.57<br>(95% CI<br>0.07,<br>37.54)  | NSS |
| <b>Opioids</b> | Gastroenteritis            | NCTT01124617<br>2010 | Tapentadol 25-<br>250 mg twice<br>daily<br>Placebo | 1 | 91  | 5%<br>(3/60)   | 3.2%<br>(1/31)   | RR 1.55<br>(95% CI<br>0.17,<br>14.29)  | NSS |
| <b>Opioids</b> | Hallucination              | Zin 2010             | Oxycodone 2<br>mg/ml twice<br>daily<br>Placebo     | 1 | 62  | 6.9%<br>(2/29) | 0%<br>(0/33)     | RR 5.67<br>(95% CI<br>0.28,<br>113.42) | NSS |
| <b>Opioids</b> | Hepatobiliary<br>Disorders | Hanna 2008           | Oxycodone 10-<br>80 mg daily<br>Placebo            | 1 | 338 | 0%<br>(0/169)  | 0.59%<br>(1/169) | RR 0.33<br>(95% CI<br>0.01, 8.13)      | NSS |
| <b>Opioids</b> | Herpes Simplex             | NCTT01124617<br>2010 | Tapentadol 25-<br>250 mg twice<br>daily<br>Placebo | 1 | 91  | 1.7%<br>(1/60) | 0%<br>(0/31)     | RR 1.57<br>(95% CI<br>0.07,<br>37.54)  | NSS |
| <b>Opioids</b> | Hot Flush                  | NCTT01124617<br>2010 | Tapentadol 25-<br>250 mg twice<br>daily<br>Placebo | 1 | 91  | 1.7%<br>(1/60) | 0%<br>(0/31)     | RR 1.57<br>(95% CI<br>0.07,<br>37.54)  | NSS |
| <b>Opioids</b> | Hyperglycaemia             | NCTT01124617<br>2010 | Tapentadol 25-<br>250 mg twice<br>daily<br>Placebo | 1 | 91  | 1.7%<br>(1/60) | 0%<br>(0/31)     | RR 1.57<br>(95% CI<br>0.07,<br>37.54)  | NSS |



|                |                                            |                      |                                                    |   |    |                |                |                                       |     |
|----------------|--------------------------------------------|----------------------|----------------------------------------------------|---|----|----------------|----------------|---------------------------------------|-----|
| <b>Opioids</b> | Hyperhidrosis                              | NCTT01124617<br>2010 | Tapentadol 25-<br>250 mg twice<br>daily<br>Placebo | 1 | 91 | 1.7%<br>(1/60) | 0%<br>(0/31)   | RR 1.57<br>(95% CI<br>0.07,<br>37.54) | NSS |
| <b>Opioids</b> | Hyperlipidaemia                            | NCTT01124617<br>2010 | Tapentadol 25-<br>250 mg twice<br>daily<br>Placebo | 1 | 91 | 1.7%<br>(1/60) | 0%<br>(0/31)   | RR 1.57<br>(95% CI<br>0.07,<br>37.54) | NSS |
| <b>Opioids</b> | Hypertension                               | NCTT01124617<br>2010 | Tapentadol 25-<br>250 mg twice<br>daily<br>Placebo | 1 | 91 | 3.3%<br>(2/60) | 0%<br>(0/31)   | RR 2.62<br>(95% CI<br>0.13,<br>53.01) | NSS |
| <b>Opioids</b> | Hypoglycaemia                              | NCTT01124617<br>2010 | Tapentadol 25-<br>250 mg twice<br>daily<br>Placebo | 1 | 91 | 3.3%<br>(2/60) | 0%<br>(0/31)   | RR 2.62<br>(95% CI<br>0.13,<br>53.01) | NSS |
| <b>Opioids</b> | Hypotension                                | NCTT01124617<br>2010 | Tapentadol 25-<br>250 mg twice<br>daily<br>Placebo | 1 | 91 | 1.7%<br>(1/60) | 0%<br>(0/31)   | RR 1.57<br>(95% CI<br>0.07,<br>37.54) | NSS |
| <b>Opioids</b> | Hypothyroidism                             | NCTT01124617<br>2010 | Tapentadol 25-<br>250 mg twice<br>daily<br>Placebo | 1 | 91 | 0%<br>(0/60)   | 3.2%<br>(1/31) | RR 0.17<br>(95% CI<br>0.01, 4.17)     | NSS |
| <b>Opioids</b> | Hypoventilation                            | NCTT01124617<br>2010 | Tapentadol 25-<br>250 mg twice<br>daily<br>Placebo | 1 | 91 | 1.7%<br>(1/60) | 0%<br>(0/31)   | RR 1.57<br>(95% CI<br>0.07,<br>37.54) | NSS |
| <b>Opioids</b> | Imbalance                                  | Zin 2010             | Oxycodone 2<br>mg/ml twice<br>daily<br>Placebo     | 1 | 62 | 6.9%<br>(2/29) | 6.1%<br>(2/33) | RR 1.14<br>(95% CI<br>0.17, 7.57)     | NSS |
| <b>Opioids</b> | Increased Blood<br>Alkaline<br>Phosphatase | NCTT01124617<br>2010 | Tapentadol 25-<br>250 mg twice<br>daily<br>Placebo | 1 | 91 | 1.7%<br>(1/60) | 0%<br>(0/31)   | RR 1.57<br>(95% CI<br>0.07,<br>37.54) | NSS |

|                |                                                 |                   |                                             |   |     |                  |                  |                                 |     |
|----------------|-------------------------------------------------|-------------------|---------------------------------------------|---|-----|------------------|------------------|---------------------------------|-----|
| <b>Opioids</b> | Increased Blood Creatine Phosphokinase          | NCTT01124617 2010 | Tapentadol 25-250 mg twice daily<br>Placebo | 1 | 91  | 3.3%<br>(2/60)   | 0%<br>(0/31)     | RR 2.62<br>(95% CI 0.13, 53.01) | NSS |
| <b>Opioids</b> | Increased Blood Pressure                        | NCTT01124617 2010 | Tapentadol 25-250 mg twice daily<br>Placebo | 1 | 91  | 1.7%<br>(1/60)   | 3.2%<br>(1/31)   | RR 0.52<br>(95% CI 0.03, 7.98)  | NSS |
| <b>Opioids</b> | Increased Eosinophil Percentage                 | NCTT01124617 2010 | Tapentadol 25-250 mg twice daily<br>Placebo | 1 | 91  | 0%<br>(0/60)     | 3.2%<br>(1/31)   | RR 0.17<br>(95% CI 0.01, 4.17)  | NSS |
| <b>Opioids</b> | Increased Gamma-glutamyltransferase             | NCTT01124617 2010 | Tapentadol 25-250 mg twice daily<br>Placebo | 1 | 91  | 1.7%<br>(1/60)   | 0%<br>(0/31)     | RR 1.57<br>(95% CI 0.07, 37.54) | NSS |
| <b>Opioids</b> | Increased Glycosylated Haemoglobin              | NCTT01124617 2010 | Tapentadol 25-250 mg twice daily<br>Placebo | 1 | 91  | 0%<br>(0/60)     | 3.2%<br>(1/31)   | RR 0.17<br>(95% CI 0.01, 4.17)  | NSS |
| <b>Opioids</b> | Increased Neutrophil Count                      | NCTT01124617 2010 | Tapentadol 25-250 mg twice daily<br>Placebo | 1 | 91  | 1.7%<br>(1/60)   | 0%<br>(0/31)     | RR 1.57<br>(95% CI 0.07, 37.54) | NSS |
| <b>Opioids</b> | Increased White Blood Cell Count                | NCTT01124617 2010 | Tapentadol 25-250 mg twice daily<br>Placebo | 1 | 91  | 1.7%<br>(1/60)   | 0%<br>(0/31)     | RR 1.57<br>(95% CI 0.07, 37.54) | NSS |
| <b>Opioids</b> | Ingrown Nail                                    | NCTT01124617 2010 | Tapentadol 25-250 mg twice daily<br>Placebo | 1 | 91  | 1.7%<br>(1/60)   | 0%<br>(0/31)     | RR 1.57<br>(95% CI 0.07, 37.54) | NSS |
| <b>Opioids</b> | Injury, Poisoning, and Procedural Complications | Hanna 2008        | Oxycodone 10-80 mg daily<br>Placebo         | 1 | 338 | 7.1%<br>(12/169) | 9.5%<br>(16/169) | RR 0.75<br>(95% CI 0.37, 1.54)  | NSS |

|                |                                   |                      |                                                    |   |    |                |                |                                        |     |
|----------------|-----------------------------------|----------------------|----------------------------------------------------|---|----|----------------|----------------|----------------------------------------|-----|
| <b>Opioids</b> | Insomnia                          | NCTT01124617<br>2010 | Tapentadol 25-<br>250 mg twice<br>daily<br>Placebo | 1 | 91 | 8.3%<br>(5/60) | 0%<br>(0/31)   | RR 5.77<br>(95% CI<br>0.33,<br>101.10) | NSS |
| <b>Opioids</b> | Iron Deficiency<br>Anaemia        | NCTT01124617<br>2010 | Tapentadol 25-<br>250 mg twice<br>daily<br>Placebo | 1 | 91 | 1.7%<br>(1/60) | 0%<br>(0/31)   | RR 1.57<br>(95% CI<br>0.07,<br>37.54)  | NSS |
| <b>Opioids</b> | Irritability                      | NCTT01124617<br>2010 | Tapentadol 25-<br>250 mg twice<br>daily<br>Placebo | 1 | 91 | 1.7%<br>(1/60) | 0%<br>(0/31)   | RR 1.57<br>(95% CI<br>0.07,<br>37.54)  | NSS |
| <b>Opioids</b> | Irritable Bowel<br>Syndrome       | NCTT01124617<br>2010 | Tapentadol 25-<br>250 mg twice<br>daily<br>Placebo | 1 | 91 | 0%<br>(0/60)   | 3.2%<br>(1/31) | RR 0.17<br>(95% CI<br>0.01, 4.17)      | NSS |
| <b>Opioids</b> | Listlessness                      | NCTT01124617<br>2010 | Tapentadol 25-<br>250 mg twice<br>daily<br>Placebo | 1 | 91 | 1.7%<br>(1/60) | 0%<br>(0/31)   | RR 1.57<br>(95% CI<br>0.07,<br>37.54)  | NSS |
| <b>Opioids</b> | Loss of<br>Consciousness<br>(SAE) | NCTT01124617<br>2010 | Tapentadol 25-<br>250 mg twice<br>daily<br>Placebo | 1 | 91 | 0%<br>(0/60)   | 3.2%<br>(1/31) | RR 0.17<br>(95% CI<br>0.01, 4.17)      | NSS |
| <b>Opioids</b> | Macular Oedema                    | NCTT01124617<br>2010 | Tapentadol 25-<br>250 mg twice<br>daily<br>Placebo | 1 | 91 | 0%<br>(0/60)   | 3.2%<br>(1/31) | RR 0.17<br>(95% CI<br>0.01, 4.17)      | NSS |
| <b>Opioids</b> | Malaise                           | NCTT01124617<br>2010 | Tapentadol 25-<br>250 mg twice<br>daily<br>Placebo | 1 | 91 | 5%<br>(3/60)   | 3.2%<br>(1/31) | RR 1.55<br>(95% CI<br>0.17,<br>14.29)  | NSS |
| <b>Opioids</b> | Motion Sickness                   | NCTT01124617<br>2010 | Tapentadol 25-<br>250 mg twice<br>daily<br>Placebo | 1 | 91 | 1.7%<br>(1/60) | 0%<br>(0/31)   | RR 1.57<br>(95% CI<br>0.07,<br>37.54)  | NSS |

|                |                                                                          |                      |                                             |   |     |                   |                   |                                    |     |
|----------------|--------------------------------------------------------------------------|----------------------|---------------------------------------------|---|-----|-------------------|-------------------|------------------------------------|-----|
| <b>Opioids</b> | MSK and Connective Tissue Disorders                                      | Hanna 2008           | Oxycodone 10-80 mg daily<br>Placebo         | 1 | 338 | 18.3%<br>(31/169) | 15.4%<br>(26/169) | RR 1.19<br>(95% CI<br>0.74, 1.92)  | NSS |
| <b>Opioids</b> | Muscular Weakness                                                        | NCTT01124617<br>2010 | Tapentadol 25-250 mg twice daily<br>Placebo | 1 | 91  | 0%<br>(0/60)      | 3.2%<br>(1/31)    | RR 0.17<br>(95% CI<br>0.01, 4.17)  | NSS |
| <b>Opioids</b> | Nasopharyngitis                                                          | NCTT01124617<br>2010 | Tapentadol 25-250 mg twice daily<br>Placebo | 1 | 91  | 11.7%<br>(7/60)   | 12.9%<br>(4/31)   | RR 0.90<br>(95% CI<br>0.29, 2.85)  | NSS |
| <b>Opioids</b> | Neoplasms benign, malignant and unspecified (including cysts and polyps) | Hanna 2008           | Oxycodone 10-80 mg daily<br>Placebo         | 1 | 338 | 1.8%<br>(3/169)   | 1.2%<br>(2/169)   | RR 1.50<br>(95% CI<br>0.25, 8.86)  | NSS |
| <b>Opioids</b> | Ocular Hyperaemia                                                        | NCTT01124617<br>2010 | Tapentadol 25-250 mg twice daily<br>Placebo | 1 | 91  | 0%<br>(0/60)      | 3.2%<br>(1/31)    | RR 0.17<br>(95% CI<br>0.01, 4.17)  | NSS |
| <b>Opioids</b> | Oedema                                                                   | NCTT01124617<br>2010 | Tapentadol 25-250 mg twice daily<br>Placebo | 1 | 91  | 1.7%<br>(1/60)    | 0%<br>(0/31)      | RR 1.57<br>(95% CI<br>0.07, 37.54) | NSS |
| <b>Opioids</b> | Oropharyngeal Pain                                                       | NCTT01124617<br>2010 | Tapentadol 25-250 mg twice daily<br>Placebo | 1 | 91  | 3.3%<br>(2/60)    | 0%<br>(0/31)      | RR 2.62<br>(95% CI<br>0.13, 53.01) | NSS |
| <b>Opioids</b> | Otitis Media                                                             | NCTT01124617<br>2010 | Tapentadol 25-250 mg twice daily<br>Placebo | 1 | 91  | 1.7%<br>(1/60)    | 0%<br>(0/31)      | RR 1.57<br>(95% CI<br>0.07, 37.54) | NSS |
| <b>Opioids</b> | Pain in Extremity                                                        | NCTT01124617<br>2010 | Tapentadol 25-250 mg twice daily<br>Placebo | 1 | 91  | 1.7%<br>(1/60)    | 0%<br>(0/31)      | RR 1.57<br>(95% CI<br>0.07, 37.54) | NSS |

|                |                          |                      |                                                    |   |    |                |                |                                       |     |
|----------------|--------------------------|----------------------|----------------------------------------------------|---|----|----------------|----------------|---------------------------------------|-----|
| <b>Opioids</b> | Periodontitis            | NCTT01124617<br>2010 | Tapentadol 25-<br>250 mg twice<br>daily<br>Placebo | 1 | 91 | 1.7%<br>(1/60) | 0%<br>(0/31)   | RR 1.57<br>(95% CI<br>0.07,<br>37.54) | NSS |
| <b>Opioids</b> | Peripheral Edema         | Zin 2010             | Oxycodone 2<br>mg/ml twice<br>daily<br>Placebo     | 1 | 62 | 3.4%<br>(1/29) | 9.1%<br>(3/33) | RR 0.38<br>(95% CI<br>0.04, 3.45)     | NSS |
| <b>Opioids</b> | Postural Dizziness       | NCTT01124617<br>2010 | Tapentadol 25-<br>250 mg twice<br>daily<br>Placebo | 1 | 91 | 1.7%<br>(1/60) | 0%<br>(0/31)   | RR 1.57<br>(95% CI<br>0.07,<br>37.54) | NSS |
| <b>Opioids</b> | Protein Urine<br>Present | NCTT01124617<br>2010 | Tapentadol 25-<br>250 mg twice<br>daily<br>Placebo | 1 | 91 | 3.3%<br>(2/60) | 0%<br>(0/31)   | RR 2.62<br>(95% CI<br>0.13,<br>53.01) | NSS |
| <b>Opioids</b> | Prurigo                  | NCTT01124617<br>2010 | Tapentadol 25-<br>250 mg twice<br>daily<br>Placebo | 1 | 91 | 1.7%<br>(1/60) | 0%<br>(0/31)   | RR 1.57<br>(95% CI<br>0.07,<br>37.54) | NSS |
| <b>Opioids</b> | Pruritus,<br>generalized | NCTT01124617<br>2010 | Tapentadol 25-<br>250 mg twice<br>daily<br>Placebo | 1 | 91 | 1.7%<br>(1/60) | 0%<br>(0/31)   | RR 1.57<br>(95% CI<br>0.07,<br>37.54) | NSS |
| <b>Opioids</b> | Pyrexia                  | NCTT01124617<br>2010 | Tapentadol 25-<br>250 mg twice<br>daily<br>Placebo | 1 | 91 | 3.3%<br>(2/60) | 0%<br>(0/31)   | RR 2.62<br>(95% CI<br>0.13,<br>53.01) | NSS |
| <b>Opioids</b> | Radial Nerve Palsy       | NCTT01124617<br>2010 | Tapentadol 25-<br>250 mg twice<br>daily<br>Placebo | 1 | 91 | 1.7%<br>(1/60) | 0%<br>(0/31)   | RR 1.57<br>(95% CI<br>0.07,<br>37.54) | NSS |
| <b>Opioids</b> | Rash                     | NCTT01124617<br>2010 | Tapentadol 25-<br>250 mg twice<br>daily<br>Placebo | 1 | 91 | 3.3%<br>(2/60) | 0%<br>(0/31)   | RR 2.62<br>(95% CI<br>0.13,<br>53.01) | NSS |

|                |                                                 |                      |                                             |   |     |                 |                 |                                  |     |
|----------------|-------------------------------------------------|----------------------|---------------------------------------------|---|-----|-----------------|-----------------|----------------------------------|-----|
| <b>Opioids</b> | Renal and Urinary Problems                      | Hanna 2008           | Oxycodone 10-80 mg daily<br>Placebo         | 1 | 338 | 4.1%<br>(7/169) | 2.4%<br>(4/169) | RR 1.75<br>(95% CI 0.52, 5.87)   | NSS |
| <b>Opioids</b> | Reproductive System and Breast Disorders        | Hanna 2008           | Oxycodone 10-80 mg daily<br>Placebo         | 1 | 338 | 1.8%<br>(3/169) | 0%<br>(0/169)   | RR 7.00<br>(95% CI 0.36, 134.49) | NSS |
| <b>Opioids</b> | Respiratory, Thoracic and Mediastinal Disorders | Hanna 2008           | Oxycodone 10-80 mg daily<br>Placebo         | 1 | 338 | 1.8%<br>(3/169) | 0%<br>(0/169)   | RR 7.00<br>(95% CI 0.36, 134.49) | NSS |
| <b>Opioids</b> | Retinal Haemorrhage                             | NCTT01124617<br>2010 | Tapentadol 25-250 mg twice daily<br>Placebo | 1 | 91  | 1.7%<br>(1/60)  | 3.2%<br>(1/31)  | RR 1.57<br>(95% CI 0.07, 37.54)  | NSS |
| <b>Opioids</b> | Rhinitis Allergic                               | NCTT01124617<br>2010 | Tapentadol 25-250 mg twice daily<br>Placebo | 1 | 91  | 1.7%<br>(1/60)  | 0%<br>(0/31)    | RR 1.57<br>(95% CI 0.07, 37.54)  | NSS |
| <b>Opioids</b> | Sinusitis                                       | NCTT01124617<br>2010 | Tapentadol 25-250 mg twice daily<br>Placebo | 1 | 91  | 0%<br>(0/60)    | 3.2%<br>(1/31)  | RR 0.17<br>(95% CI 0.01, 4.17)   | NSS |
| <b>Opioids</b> | Spinal OA                                       | NCTT01124617<br>2010 | Tapentadol 25-250 mg twice daily<br>Placebo | 1 | 91  | 1.7%<br>(1/60)  | 0%<br>(0/31)    | RR 1.57<br>(95% CI 0.07, 37.54)  | NSS |
| <b>Opioids</b> | Stomatitis                                      | NCTT01124617<br>2010 | Tapentadol 25-250 mg twice daily<br>Placebo | 1 | 91  | 1.7%<br>(1/60)  | 0%<br>(0/31)    | RR 1.57<br>(95% CI 0.07, 37.54)  | NSS |
| <b>Opioids</b> | Surgical and Medical Procedures                 | Hanna 2008           | Oxycodone 10-80 mg daily<br>Placebo         | 1 | 338 | 5.3%<br>(9/169) | 3.0%<br>(5/169) | RR 1.80<br>(95% CI 0.62, 5.26)   | NSS |
| <b>Opioids</b> | Sweating                                        | Zin 2010             | Oxycodone 2 mg/ml twice daily               | 1 | 62  | 6.9%<br>(2/29)  | 0%<br>(0/33)    | RR 5.67<br>(95% CI               | NSS |

|                |                                  |                      |                                                    |   |     |                 |                 |                                        |     |
|----------------|----------------------------------|----------------------|----------------------------------------------------|---|-----|-----------------|-----------------|----------------------------------------|-----|
|                |                                  |                      | Placebo                                            |   |     |                 |                 | 0.28,<br>113.42)                       |     |
| <b>Opioids</b> | Tachypnoea                       | NCTT01124617<br>2010 | Tapentadol 25-<br>250 mg twice<br>daily<br>Placebo | 1 | 91  | 0%<br>(0/60)    | 3.2%<br>(1/31)  | RR 0.17<br>(95% CI<br>0.01, 4.17)      | NSS |
| <b>Opioids</b> | Thirst                           | NCTT01124617<br>2010 | Tapentadol 25-<br>250 mg twice<br>daily<br>Placebo | 1 | 91  | 8.3%<br>(5/60)  | 0%<br>(0/31)    | RR 5.77<br>(95% CI<br>0.33,<br>101.10) | NSS |
| <b>Opioids</b> | Tinea Pedis                      | NCTT01124617<br>2010 | Tapentadol 25-<br>250 mg twice<br>daily<br>Placebo | 1 | 91  | 0%<br>(0/60)    | 3.2%<br>(1/31)  | RR 0.17<br>(95% CI<br>0.01, 4.17)      | NSS |
| <b>Opioids</b> | Tonsillitis                      | NCTT01124617<br>2010 | Tapentadol 25-<br>250 mg twice<br>daily<br>Placebo | 1 | 91  | 0%<br>(0/60)    | 3.2%<br>(1/31)  | RR 0.17<br>(95% CI<br>0.01, 4.17)      | NSS |
| <b>Opioids</b> | Tremor                           | Zin 2010             | Oxycodone 2<br>mg/ml twice<br>daily<br>Placebo     | 1 | 62  | 6.9%<br>(2/29)  | 3.0%<br>(1/33)  | RR 2.28<br>(95% CI<br>0.22,<br>23.82)  | NSS |
| <b>Opioids</b> | Trichiasis                       | NCTT01124617<br>2010 | Tapentadol 25-<br>250 mg twice<br>daily<br>Placebo | 1 | 91  | 0%<br>(0/60)    | 3.2%<br>(1/31)  | RR 0.17<br>(95% CI<br>0.01, 4.17)      | NSS |
| <b>Opioids</b> | Urinary Tract<br>Infection (SAE) | NCTT01124617<br>2010 | Tapentadol 25-<br>250 mg twice<br>daily<br>Placebo | 1 | 91  | 0%<br>(0/60)    | 3.2%<br>(1/31)  | RR 0.17<br>(95% CI<br>0.01, 4.17)      | NSS |
| <b>Opioids</b> | Vascular Disorders               | Hanna 2008           | Oxycodone 10-<br>80 mg daily<br>Placebo            | 1 | 338 | 4.7%<br>(8/169) | 2.4%<br>(4/169) | RR 2.00<br>(95% CI<br>0.61, 6.52)      | NSS |
| <b>Opioids</b> | Visual Disturbances              | Zin 2010             | Oxycodone 2<br>mg/ml twice<br>daily<br>Placebo     | 1 | 62  | 10.3%<br>(3/29) | 6.1%<br>(2/33)  | RR 1.71<br>(95% CI<br>0.31, 9.52)      | NSS |

|                     |                                            |                      |                                                                                                         |   |     |                    |                    |                                       |     |
|---------------------|--------------------------------------------|----------------------|---------------------------------------------------------------------------------------------------------|---|-----|--------------------|--------------------|---------------------------------------|-----|
| <b>Opioids</b>      | Vomiting (SAE)                             | NCTT01124617<br>2010 | Tapentadol 25-<br>250 mg twice<br>daily<br>Placebo                                                      | 1 | 91  | 1.7%<br>(1/60)     | 0%<br>(0/31)       | RR 1.57<br>(95% CI<br>0.07,<br>37.54) | NSS |
| <b>Opioids</b>      | Wound                                      | NCTT01124617<br>2010 | Tapentadol 25-<br>250 mg twice<br>daily<br>Placebo                                                      | 1 | 91  | 1.7%<br>(1/60)     | 0%<br>(0/31)       | RR 1.57<br>(95% CI<br>0.07,<br>37.54) | NSS |
| <b>Opioids</b>      | Xeroderma                                  | NCTT01124617<br>2010 | Tapentadol 25-<br>250 mg twice<br>daily<br>Placebo                                                      | 1 | 91  | 3.3%<br>(2/60)     | 3.2%<br>(1/31)     | RR 1.03<br>(95% CI<br>0.10,<br>10.96) | NSS |
| <b>Rubefacients</b> | ≥1 Treatment-<br>emergent Adverse<br>Event | Irving 2011          | 8% Capsaicin<br>Patch; Applied<br>for one, 60-<br>minute session<br>0.04%<br>Capsaicin<br>Placebo Patch | 1 | 416 | 98.1%<br>(208/212) | 86.8%<br>(177/204) | RR 1.13<br>(95% CI<br>1.07, 1.20)     | 9   |
| <b>Rubefacients</b> | ≥1 Treatment-<br>emergent Adverse<br>Event | Webster 2010         | 8% Capsaicin<br>Patch; Applied<br>for one, 60-<br>minute session<br>0.04%<br>Capsaicin<br>Placebo Patch | 1 | 155 | 74.5%<br>(76/102)  | 52.8%<br>(28/53)   | RR 1.41<br>(95% CI<br>1.07, 1.86)     | 5   |
| <b>Rubefacients</b> | Any adverse event                          | Backonja 2008        | 8% Capsaicin<br>Patch applied<br>once for 60<br>minutes<br>0.04% Placebo<br>Patch                       | 1 | 402 | 99.0%<br>(203/205) | 88.3%<br>(174/197) | RR 1.12<br>(95% CI<br>1.06, 1.18)     | 10  |
| <b>Rubefacients</b> | Any adverse event                          | Vinik 2015           | 8% Capsaicin<br>Patch; applied<br>for 60<br>minutes, 1-7<br>times during<br>intervention                | 1 | 468 | 69.4%<br>(109/157) | 48.1%<br>(37/77)   | RR 1.44<br>(95% CI<br>1.12, 1.86)     | 5   |



|                     |                                     |              |                                                                                                                                                                        |   |     |                    |                   |                                       |     |
|---------------------|-------------------------------------|--------------|------------------------------------------------------------------------------------------------------------------------------------------------------------------------|---|-----|--------------------|-------------------|---------------------------------------|-----|
|                     |                                     |              | period<br>(separated by<br>8 week<br>intervals)<br><br>Standard of<br>Care                                                                                             |   |     |                    |                   |                                       |     |
| <b>Rubefacients</b> | Any adverse event                   | Vinik 2015   | 8% Capsaicin<br>Patch; applied<br>for 30<br>minutes, 1-7<br>times during<br>intervention<br>period<br>(separated by<br>8 week<br>intervals)<br><br>Standard of<br>Care | 1 | 468 | 67.3%<br>(105/156) | 48.7%<br>(38/78)  | RR 1.38<br>(95% CI<br>1.07, 1.78)     | 6   |
| <b>Rubefacients</b> | Treatment-related<br>Adverse Events | Simpson 2017 | 8% Capsaicin<br>Patch (applied<br>once for 30<br>minutes)<br>Placebo Patch                                                                                             | 1 | 369 | 46.8%<br>(87/186)  | 33.9%<br>(62/183) | RR 1.38<br>(95% CI<br>1.07, 1.78)     | 8   |
| <b>Rubefacients</b> | Application Site<br>Discoloration   | Webster 2010 | 8% Capsaicin<br>Patch; Applied<br>for one, 60-<br>minute session<br>0.04%<br>Capsaicin<br>Placebo Patch                                                                | 1 | 155 | 0%<br>(0/102)      | 5.7%<br>(3/53)    | RR 0.07<br>(95% CI<br>0.00, 1.42)     | NSS |
| <b>Rubefacients</b> | Application Site<br>Dryness         | Webster 2010 | 8% Capsaicin<br>Patch; Applied<br>for one, 60-<br>minute session                                                                                                       | 1 | 155 | 9.8%<br>(10/102)   | 3.8%<br>(2/53)    | RR 2.60<br>(95% CI<br>0.59,<br>11.43) | NSS |

|                     |                            |              |                                                                                         |   |     |              |             |                               |     |
|---------------------|----------------------------|--------------|-----------------------------------------------------------------------------------------|---|-----|--------------|-------------|-------------------------------|-----|
|                     |                            |              | 0.04% Capsaicin Placebo Patch                                                           |   |     |              |             |                               |     |
| <b>Rubefacients</b> | Application Site Urticaria | Webster 2010 | 8% Capsaicin Patch; Applied for one, 60-minute session<br>0.04% Capsaicin Placebo Patch | 1 | 155 | 2.9% (3/102) | 0% (0/53)   | RR 3.67 (95% CI 0.19, 69.76)  | NSS |
| <b>Rubefacients</b> | Application Site Vesicles  | Webster 2010 | 8% Capsaicin Patch; Applied for one, 60-minute session<br>0.04% Capsaicin Placebo Patch | 1 | 155 | 4.9% (5/102) | 1.9% (1/53) | RR 2.60 (95% CI 0.31, 21.67)  | NSS |
| <b>Rubefacients</b> | Arthralgia                 | Watson 1993  | 0.075% Capsaicin Cream applied four times daily<br>Vehicle Cream                        | 1 | 143 | 1.4% (1/74)  | 0% (0/69)   | RR 2.8 (95% CI 0.12, 67.60)   | NSS |
| <b>Rubefacients</b> | Asthenia                   | Watson 1993  | 0.075% Capsaicin Cream applied four times daily<br>Vehicle Cream                        | 1 | 143 | 4.1% (3/74)  | 0% (0/69)   | RR 6.53 (95% CI 0.34, 124.24) | NSS |
| <b>Rubefacients</b> | Bone Disorder              | Watson 1993  | 0.075% Capsaicin Cream applied four times daily<br>Vehicle Cream                        | 1 | 143 | 1.4% (1/74)  | 1.4% (1/69) | RR 0.93 (95% CI 0.06, 14.62)  | NSS |
| <b>Rubefacients</b> | Bronchitis                 | Webster 2010 | 8% Capsaicin Patch; Applied                                                             | 1 | 155 | 2.9% (3/102) | 0% (0/53)   | RR 3.67 (95% CI               | NSS |

|                     |                                   |                            |                                                                                            |   |     |               |               |                              |     |
|---------------------|-----------------------------------|----------------------------|--------------------------------------------------------------------------------------------|---|-----|---------------|---------------|------------------------------|-----|
|                     |                                   |                            | for one, 60-minute session<br>0.04% Capsaicin<br>Placebo Patch                             |   |     |               |               | 0.19, 69.76)                 |     |
| <b>Rubefacients</b> | Cerebrovascular Accident          | Watson 1993                | 0.075% Capsaicin Cream applied four times daily<br>Vehicle Cream                           | 1 | 143 | 2.7% (2/74)   | 0% (0/69)     | RR 4.67 (95% CI 0.23, 95.52) | NSS |
| <b>Rubefacients</b> | Diarrhea                          | Watson 1993                | 0.075% Capsaicin Cream applied four times daily<br>Vehicle Cream                           | 1 | 143 | 0% (0/74)     | 2.9% (2/69)   | RR 0.19 (95% CI 0.01, 3.82)  | NSS |
| <b>Rubefacients</b> | Dry Skin                          | Capsaicin Study Group 1992 | 0.075% Capsaicin Cream applied four times daily<br>Vehicle Cream                           | 1 | 277 | 3.6% (5/138)  | 4.3% (6/139)  | RR 0.84 (95% CI 0.26, 2.69)  | NSS |
| <b>Rubefacients</b> | Epistaxis                         | Watson 1993                | 0.075% Capsaicin Cream applied four times daily<br>Vehicle Cream                           | 1 | 143 | 0% (0/74)     | 1.4% (1/69)   | RR 0.31 (95% CI 0.01, 7.51)  | NSS |
| <b>Rubefacients</b> | Erythema (Location not specified) | Irving 2011                | 8% Capsaicin Patch; Applied for one, 60-minute session<br>0.04% Capsaicin<br>Placebo Patch | 1 | 416 | 6.1% (13/212) | 7.8% (16/204) | RR 0.78 (95% CI 0.39, 1.58)  | NSS |

|                     |                        |              |                                                                                            |   |     |                  |                  |                                   |     |
|---------------------|------------------------|--------------|--------------------------------------------------------------------------------------------|---|-----|------------------|------------------|-----------------------------------|-----|
| <b>Rubefacients</b> | Evidence of Irritation | Simpson 2017 | 8% Capsaicin Patch (applied once for 30 minutes)<br>Placebo Patch                          | 1 | 369 | 8.6%<br>(16/186) | 5.5%<br>(10/183) | RR 1.57<br>(95% CI<br>0.73, 3.38) | NSS |
| <b>Rubefacients</b> | Facial Edema           | Watson 1993  | 0.075% Capsaicin Cream applied four times daily<br>Vehicle Cream                           | 1 | 143 | 0%<br>(0/74)     | 1.4%<br>(1/69)   | RR 0.31<br>(95% CI<br>0.01, 7.51) | NSS |
| <b>Rubefacients</b> | Fever                  | Watson 1993  | 0.075% Capsaicin Cream applied four times daily<br>Vehicle Cream                           | 1 | 143 | 1.4%<br>(1/74)   | 0%<br>(0/69)     | RR 2.8<br>(95% CI<br>0.12, 67.60) | NSS |
| <b>Rubefacients</b> | Heart Failure          | Watson 1993  | 0.075% Capsaicin Cream applied four times daily<br>Vehicle Cream                           | 1 | 143 | 0%<br>(0/74)     | 1.4%<br>(1/69)   | RR 0.31<br>(95% CI<br>0.01, 7.51) | NSS |
| <b>Rubefacients</b> | Herpes Zoster          | Webster 2010 | 8% Capsaicin Patch; Applied for one, 60-minute session<br>0.04% Capsaicin<br>Placebo Patch | 1 | 155 | 2.9%<br>(3/102)  | 3.8%<br>(2/53)   | RR 0.78<br>(95% CI<br>0.13, 4.52) | NSS |
| <b>Rubefacients</b> | Injury                 | Webster 2010 | 8% Capsaicin Patch; Applied for one, 60-minute session<br>0.04% Capsaicin<br>Placebo Patch | 1 | 155 | 0.98%<br>(1/102) | 3.8%<br>(2/53)   | RR 0.26<br>(95% CI<br>0.02, 2.80) | NSS |

|                     |                                                 |               |                                                                                            |   |     |                   |                   |                                 |     |
|---------------------|-------------------------------------------------|---------------|--------------------------------------------------------------------------------------------|---|-----|-------------------|-------------------|---------------------------------|-----|
| <b>Rubefacients</b> | Musculoskeletal and Connective Tissue Disorders | Irving 2011   | 8% Capsaicin Patch; Applied for one, 60-minute session<br>0.04% Capsaicin<br>Placebo Patch | 1 | 416 | 6.6%<br>(14/212)  | 7.8%<br>(16/204)  | RR 0.84<br>(95% CI 0.42, 1.68)  | NSS |
| <b>Rubefacients</b> | Pruritus (Location not specified)               | Irving 2011   | 8% Capsaicin Patch; Applied for one, 60-minute session<br>0.04% Capsaicin<br>Placebo Patch | 1 | 416 | 3.3%<br>(7/212)   | 0.98%<br>(2/204)  | RR 3.37<br>(95% CI 0.71, 16.02) | NSS |
| <b>Rubefacients</b> | Respiratory, thoracic and mediastinal disorders | Irving 2011   | 8% Capsaicin Patch; Applied for one, 60-minute session<br>0.04% Capsaicin<br>Placebo Patch | 1 | 416 | 3.3%<br>(7/212)   | 6.9%<br>(14/204)  | RR 0.48<br>(95% CI 0.20, 1.17)  | NSS |
| <b>Rubefacients</b> | Worsening of PHN                                | Backonja 2008 | 8% Capsaicin Patch applied once for 60 minutes<br>0.04% Placebo Patch                      | 1 | 402 | 2.9%<br>(6/205)   | 5.1%<br>(10/197)  | RR 0.58<br>(95% CI 0.21, 1.56)  | NSS |
| <b>Rubefacients</b> | Worsening of Postherpetic Neuralgia             | Irving 2011   | 8% Capsaicin Patch; Applied for one, 60-minute session<br>0.04% Capsaicin<br>Placebo Patch | 1 | 416 | 7.1%<br>(15/212)  | 5.9%<br>(12/204)  | RR 1.20<br>(95% CI 0.58, 2.51)  | NSS |
| <b>SNRIs</b>        | ≥1 treatment-emergent adverse event             | Gao 2014      | Duloxetine 60 mg daily<br>Placebo                                                          | 1 | 404 | 46.5%<br>(94/202) | 35.6%<br>(72/202) | RR 1.31<br>(95% CI 1.03, 1.65)  | 10  |

|              |                                     |                |                                         |   |     |                    |                   |                                    |     |
|--------------|-------------------------------------|----------------|-----------------------------------------|---|-----|--------------------|-------------------|------------------------------------|-----|
| <b>SNRIs</b> | ≥1 treatment-emergent adverse event | Wernicke 2006  | Duloxetine 60 mg daily<br>Placebo       | 1 | 168 | 89.5%<br>(102/114) | 72.2%<br>(39/54)  | RR 1.24<br>(95% CI<br>1.04, 1.48)  | 6   |
| <b>SNRIs</b> | Adverse Events                      | Yasuda 2011    | Duloxetine 60 mg daily<br>Placebo       | 1 | 170 | 84.9%<br>(73/86)   | 72.6%<br>(61/84)  | RR 1.17<br>(95% CI<br>1.00, 1.37)  | 9   |
| <b>SNRIs</b> | Dysuria                             | Gao 2010       | Duloxetine 60-120 mg daily<br>Placebo   | 1 | 215 | 8.5%<br>(9/106)    | 0.92%<br>(1/109)  | RR 9.25<br>(95% CI<br>1.19, 71.79) | 14  |
| <b>SNRIs</b> | Treatment-emergent adverse events   | Rowbotham 2005 | Venlafaxine 150-225 mg daily<br>Placebo | 1 | 123 | 89.0%<br>(73/82)   | 73.2%<br>(30/41)  | RR 1.22<br>(95% CI<br>1.00, 1.49)  | 7   |
| <b>SNRIs</b> | ≥1 treatment-emergent adverse event | Gao 2010       | Duloxetine 60-120 mg daily<br>Placebo   | 1 | 215 | 81.1%<br>(86/106)  | 71.6%<br>(78/109) | RR 1.13<br>(95% CI<br>0.98, 1.32)  | NSS |
| <b>SNRIs</b> | ≥1 treatment-emergent adverse event | Wernicke 2006  | Duloxetine 60 mg twice daily<br>Placebo | 1 | 166 | 85.7%<br>(96/112)  | 74.1%<br>(40/54)  | RR 1.16<br>(95% CI<br>0.97, 1.38)  | NSS |
| <b>SNRIs</b> | Abdominal Distension                | Gao 2010       | Duloxetine 60-120 mg daily<br>Placebo   | 1 | 215 | 8.5%<br>(9/106)    | 6.4%<br>(7/109)   | RR 1.32<br>(95% CI<br>0.51, 3.42)  | NSS |
| <b>SNRIs</b> | Abdominal Discomfort                | Gao 2010       | Duloxetine 60-120 mg daily<br>Placebo   | 1 | 215 | 3.8%<br>(4/106)    | 5.5%<br>(6/109)   | RR 0.69<br>(95% CI<br>0.20, 2.36)  | NSS |
| <b>SNRIs</b> | Adverse Events                      | Yasuda 2011    | Duloxetine 40 mg daily<br>Placebo       | 1 | 168 | 84.7%<br>(72/85)   | 74.7%<br>(62/83)  | RR 1.13<br>(95% CI<br>0.97, 1.32)  | NSS |
| <b>SNRIs</b> | Adverse Reaction                    | Rowbotham 2005 | Venlafaxine 75 mg daily<br>Placebo      | 1 | 122 | 7.3%<br>(6/82)     | 5.0%<br>(2/40)    | RR 1.46<br>(95% CI<br>0.31, 6.93)  | NSS |
| <b>SNRIs</b> | Adverse Reaction                    | Rowbotham 2005 | Venlafaxine 150-225 mg daily<br>Placebo | 1 | 123 | 9.8%<br>(8/82)     | 2.4%<br>(1/41)    | RR 4.00<br>(95% CI<br>0.52, 30.91) | NSS |

|              |                   |                |                                        |   |     |                  |                  |                                    |     |
|--------------|-------------------|----------------|----------------------------------------|---|-----|------------------|------------------|------------------------------------|-----|
| <b>SNRIs</b> | ALT Increased     | Yasuda 2011    | Duloxetine 40 mg daily<br>Placebo      | 1 | 168 | 5.9%<br>(5/85)   | 3.6%<br>(3/83)   | RR 1.63<br>(95% CI<br>0.40, 6.59)  | NSS |
| <b>SNRIs</b> | ALT Increased     | Yasuda 2011    | Duloxetine 60 mg daily<br>Placebo      | 1 | 170 | 5.8%<br>(5/86)   | 3.6%<br>(3/84)   | RR 1.63<br>(95% CI<br>0.40, 6.60)  | NSS |
| <b>SNRIs</b> | Any adverse event | Allen 2014     | Desvenlafaxine 50 mg daily<br>Placebo  | 1 | 85  | 74.6%<br>(47/63) | 77.3%<br>(17/22) | RR 0.97<br>(95% CI<br>0.74, 1.26)  | NSS |
| <b>SNRIs</b> | Any adverse event | Allen 2014     | Desvenlafaxine 100 mg daily<br>Placebo | 1 | 109 | 74.7%<br>(65/87) | 77.3%<br>(17/22) | RR 0.97<br>(95% CI<br>0.75, 1.25)  | NSS |
| <b>SNRIs</b> | Any adverse event | Allen 2014     | Desvenlafaxine 200 mg daily<br>Placebo | 1 | 122 | 82.8%<br>(82/99) | 73.9%<br>(17/23) | RR 1.12<br>(95% CI<br>0.87, 1.45)  | NSS |
| <b>SNRIs</b> | Any adverse event | Allen 2014     | Desvenlafaxine 400 mg daily<br>Placebo | 1 | 92  | 91.3%<br>(63/69) | 73.9%<br>(17/23) | RR 1.24<br>(95% CI<br>0.96, 1.59)  | NSS |
| <b>SNRIs</b> | AST Increased     | Yasuda 2011    | Duloxetine 40 mg daily<br>Placebo      | 1 | 168 | 5.9%<br>(5/85)   | 3.6%<br>(3/83)   | RR 1.63<br>(95% CI<br>0.40, 6.59)  | NSS |
| <b>SNRIs</b> | AST Increased     | Yasuda 2011    | Duloxetine 60 mg daily<br>Placebo      | 1 | 170 | 9.3%<br>(8/86)   | 3.6%<br>(3/84)   | RR 2.60<br>(95% CI<br>0.72, 9.49)  | NSS |
| <b>SNRIs</b> | Chest Pain (SAE)  | Goldstein 2005 | Duloxetine 20 mg daily<br>Placebo      | 1 | 153 | 0.87%<br>(1/115) | 0%<br>(0/38)     | RR 1.01<br>(95% CI<br>0.04, 24.26) | NSS |
| <b>SNRIs</b> | Chest Pain (SAE)  | Goldstein 2005 | Duloxetine 60 mg daily<br>Placebo      | 1 | 152 | 0%<br>(0/114)    | 0%<br>(0/38)     | -                                  | -   |
| <b>SNRIs</b> | Chest Pain (SAE)  | Goldstein 2005 | Duloxetine 120 mg daily<br>Placebo     | 1 | 152 | 0%<br>(0/113)    | 2.6%<br>(1/39)   | RR 0.12<br>(95% CI<br>0.00, 2.81)  | NSS |
| <b>SNRIs</b> | CK Increased      | Yasuda 2011    | Duloxetine 40 mg daily<br>Placebo      | 1 | 168 | 7.1%<br>(6/85)   | 3.6%<br>(3/83)   | RR 1.95<br>(95% CI<br>0.51, 7.55)  | NSS |

|              |                                                   |                |                                         |   |     |                |                |                                     |     |
|--------------|---------------------------------------------------|----------------|-----------------------------------------|---|-----|----------------|----------------|-------------------------------------|-----|
| <b>SNRIs</b> | CK Increased                                      | Yasuda 2011    | Duloxetine 60 mg daily<br>Placebo       | 1 | 170 | 0%<br>(0/86)   | 3.6%<br>(3/84) | RR 0.14<br>(95% CI<br>0.01, 2.66)   | NSS |
| <b>SNRIs</b> | Clinically important ECG changes during treatment | Rowbotham 2005 | Venlafaxine 75 mg daily<br>Placebo      | 1 | 122 | 4.9%<br>(4/82) | 0%<br>(0/40)   | RR 4.45<br>(95% CI<br>0.25, 80.62)  | NSS |
| <b>SNRIs</b> | Clinically important ECG changes during treatment | Rowbotham 2005 | Venlafaxine 150-225 mg daily<br>Placebo | 1 | 123 | 3.7%<br>(3/82) | 0%<br>(0/41)   | RR 3.54<br>(95% CI<br>0.19, 67.00)  | NSS |
| <b>SNRIs</b> | Dyspepsia                                         | Rowbotham 2005 | Venlafaxine 75 mg daily<br>Placebo      | 1 | 122 | 8.5%<br>(7/82) | 2.5%<br>(1/40) | RR 3.41<br>(95% CI<br>0.43, 26.82)  | NSS |
| <b>SNRIs</b> | Dyspepsia                                         | Rowbotham 2005 | Venlafaxine 150-225 mg daily<br>Placebo | 1 | 123 | 9.8%<br>(8/82) | 0%<br>(0/41)   | RR 8.60<br>(95% CI<br>0.51, 145.48) | NSS |
| <b>SNRIs</b> | ECG Rhythm Changes                                | Rowbotham 2005 | Venlafaxine 75 mg daily<br>Placebo      | 1 | 122 | 6.1%<br>(5/82) | 2.5%<br>(1/40) | RR 2.44<br>(95% CI<br>0.29, 20.19)  | NSS |
| <b>SNRIs</b> | ECG Rhythm Changes                                | Rowbotham 2005 | Venlafaxine 150-225 mg daily<br>Placebo | 1 | 123 | 4.9%<br>(4/82) | 0%<br>(0/41)   | RR 4.55<br>(95% CI<br>0.25, 82.61)  | NSS |
| <b>SNRIs</b> | Flatulence                                        | Rowbotham 2005 | Venlafaxine 75 mg daily<br>Placebo      | 1 | 122 | 1.2%<br>(1/82) | 2.5%<br>(1/40) | RR 0.49<br>(95% CI<br>0.03, 7.60)   | NSS |
| <b>SNRIs</b> | Flatulence                                        | Rowbotham 2005 | Venlafaxine 150-225 mg daily<br>Placebo | 1 | 123 | 6.1%<br>(5/82) | 2.4%<br>(1/41) | RR 2.50<br>(95% CI<br>0.30, 20.71)  | NSS |
| <b>SNRIs</b> | GGT Increased                                     | Yasuda 2011    | Duloxetine 40 mg daily<br>Placebo       | 1 | 168 | 2.4%<br>(2/85) | 3.6%<br>(3/83) | RR 0.65<br>(95% CI<br>0.11, 3.80)   | NSS |



|              |                        |                |                                         |   |     |                  |                 |                                       |     |
|--------------|------------------------|----------------|-----------------------------------------|---|-----|------------------|-----------------|---------------------------------------|-----|
| <b>SNRIs</b> | GGT Increased          | Yasuda 2011    | Duloxetine 60 mg daily<br>Placebo       | 1 | 170 | 5.8%<br>(5/86)   | 2.4%<br>(2/84)  | RR 2.44<br>(95% CI<br>0.49,<br>12.24) | NSS |
| <b>SNRIs</b> | HbA1c Increased        | Yasuda 2011    | Duloxetine 40 mg daily<br>Placebo       | 1 | 168 | 1.2%<br>(1/85)   | 2.4%<br>(2/83)  | RR 0.49<br>(95% CI<br>0.05, 5.28)     | NSS |
| <b>SNRIs</b> | HbA1c Increased        | Yasuda 2011    | Duloxetine 60 mg daily<br>Placebo       | 1 | 170 | 5.8%<br>(5/86)   | 2.4%<br>(2/84)  | RR 2.44<br>(95% CI<br>0.49,<br>12.24) | NSS |
| <b>SNRIs</b> | Hyperglycemia (SAE)    | Goldstein 2005 | Duloxetine 20 mg daily<br>Placebo       | 1 | 153 | 0%<br>(0/115)    | 0%<br>(0/38)    | -                                     | -   |
| <b>SNRIs</b> | Hyperglycemia (SAE)    | Goldstein 2005 | Duloxetine 60 mg daily<br>Placebo       | 1 | 152 | 0%<br>(0/114)    | 0%<br>(0/38)    | -                                     | -   |
| <b>SNRIs</b> | Hyperglycemia (SAE)    | Goldstein 2005 | Duloxetine 120 mg daily<br>Placebo      | 1 | 152 | 0.88%<br>(1/113) | 2.6%<br>(1/39)  | RR 0.35<br>(95% CI<br>0.02, 5.39)     | NSS |
| <b>SNRIs</b> | Hypoglycemia           | Gao 2010       | Duloxetine 60-120 mg daily<br>Placebo   | 1 | 215 | 9.4%<br>(10/106) | 4.6%<br>(5/109) | RR 2.06<br>(95% CI<br>0.73, 5.82)     | NSS |
| <b>SNRIs</b> | Impotence (males only) | Rowbotham 2005 | Venlafaxine 75 mg daily<br>Placebo      | 1 | 79  | 5.5%<br>(3/55)   | 0%<br>(0/24)    | RR 3.13<br>(95% CI<br>0.17,<br>58.26) | NSS |
| <b>SNRIs</b> | Impotence (males only) | Rowbotham 2005 | Venlafaxine 150-225 mg daily<br>Placebo | 1 | 66  | 4.8%<br>(2/42)   | 0%<br>(0/24)    | RR 2.91<br>(95% CI<br>0.15,<br>58.16) | NSS |
| <b>SNRIs</b> | LDH Increased          | Yasuda 2011    | Duloxetine 40 mg daily<br>Placebo       | 1 | 168 | 2.4%<br>(2/85)   | 2.4%<br>(2/83)  | RR 0.98<br>(95% CI<br>0.14, 6.77)     | NSS |
| <b>SNRIs</b> | LDH Increased          | Yasuda 2011    | Duloxetine 60 mg daily<br>Placebo       | 1 | 170 | 5.8%<br>(5/86)   | 2.4%<br>(2/84)  | RR 2.44<br>(95% CI                    | NSS |

|              |                             |                |                                        |   |     |                  |                |                                       |     |
|--------------|-----------------------------|----------------|----------------------------------------|---|-----|------------------|----------------|---------------------------------------|-----|
|              |                             |                |                                        |   |     |                  |                | 0.49,<br>12.24)                       |     |
| <b>SNRIs</b> | Malaise                     | Yasuda 2011    | Duloxetine 40 mg daily<br>Placebo      | 1 | 168 | 3.5%<br>(3/85)   | 2.4%<br>(2/83) | RR 1.46<br>(95% CI<br>0.25, 8.54)     | NSS |
| <b>SNRIs</b> | Malaise                     | Yasuda 2011    | Duloxetine 60 mg daily<br>Placebo      | 1 | 170 | 7.0%<br>(6/86)   | 1.2%<br>(1/84) | RR 5.86<br>(95% CI<br>0.72,<br>47.65) | NSS |
| <b>SNRIs</b> | Muscle Spasms               | Allen 2014     | Desvenlafaxine 50 mg daily<br>Placebo  | 1 | 85  | 9.5%<br>(6/63)   | 4.5%<br>(1/22) | RR 2.10<br>(95% CI<br>0.27,<br>16.45) | NSS |
| <b>SNRIs</b> | Muscle Spasms               | Allen 2014     | Desvenlafaxine 100 mg daily<br>Placebo | 1 | 109 | 4.6%<br>(4/87)   | 4.5%<br>(1/22) | RR 1.01<br>(95% CI<br>0.12, 8.60)     | NSS |
| <b>SNRIs</b> | Muscle Spasms               | Allen 2014     | Desvenlafaxine 200 mg daily<br>Placebo | 1 | 122 | 4.0%<br>(4/99)   | 4.3%<br>(1/23) | RR 0.93<br>(95% CI<br>0.11, 7.93)     | NSS |
| <b>SNRIs</b> | Muscle Spasms               | Allen 2014     | Desvenlafaxine 400 mg daily<br>Placebo | 1 | 92  | 4.3%<br>(3/69)   | 4.3%<br>(1/23) | RR 1.00<br>(95% CI<br>0.11, 9.15)     | NSS |
| <b>SNRIs</b> | Myalgia                     | Rowbotham 2005 | Venlafaxine 75 mg daily<br>Placebo     | 1 | 122 | 4.9%<br>(4/82)   | 0%<br>(0/40)   | RR 4.45<br>(95% CI<br>0.25,<br>60.62) | NSS |
| <b>SNRIs</b> | Myalgia                     | Rowbotham 2005 | Venlafaxine 150-225 mg daily           | 1 | 123 | 6.1%<br>(5/82)   | 0%<br>(0/41)   | RR 5.57<br>(95% CI<br>0.32,<br>98.29) | NSS |
| <b>SNRIs</b> | Myocardial Infarction (SAE) | Goldstein 2005 | Duloxetine 20 mg daily<br>Placebo      | 1 | 153 | 0.87%<br>(1/115) | 0%<br>(0/38)   | RR 1.01<br>(95% CI<br>0.04,<br>24.26) | NSS |
| <b>SNRIs</b> | Myocardial Infarction (SAE) | Goldstein 2005 | Duloxetine 60 mg daily<br>Placebo      | 1 | 152 | 0%<br>(0/114)    | 0%<br>(0/38)   | -                                     | -   |

|              |                                                      |                |                                         |   |     |                  |                 |                                 |     |
|--------------|------------------------------------------------------|----------------|-----------------------------------------|---|-----|------------------|-----------------|---------------------------------|-----|
| <b>SNRIs</b> | Myocardial Infarction (SAE)                          | Goldstein 2005 | Duloxetine 120 mg daily<br>Placebo      | 1 | 152 | 0.88%<br>(1/113) | 0%<br>(0/39)    | RR 1.05<br>(95% CI 0.04, 25.32) | NSS |
| <b>SNRIs</b> | Pain in Extremity                                    | Allen 2014     | Desvenlafaxine 50 mg daily<br>Placebo   | 1 | 85  | 6.3%<br>(4/63)   | 0%<br>(0/22)    | RR 3.23<br>(95% CI 0.18, 57.77) | NSS |
| <b>SNRIs</b> | Pain in Extremity                                    | Allen 2014     | Desvenlafaxine 100 mg daily<br>Placebo  | 1 | 109 | 1.1%<br>(1/87)   | 0%<br>(0/22)    | RR 0.78<br>(95% CI 0.03, 18.62) | NSS |
| <b>SNRIs</b> | Pain in Extremity                                    | Allen 2014     | Desvenlafaxine 200 mg daily<br>Placebo  | 1 | 122 | 1.0%<br>(1/99)   | 0%<br>(0/23)    | RR 0.72<br>(95% CI 0.03, 17.13) | NSS |
| <b>SNRIs</b> | Pain in Extremity                                    | Allen 2014     | Desvenlafaxine 400 mg daily<br>Placebo  | 1 | 92  | 1.4%<br>(1/69)   | 0%<br>(0/23)    | RR 1.03<br>(95% CI 0.04, 24.41) | NSS |
| <b>SNRIs</b> | Palpitations                                         | Gao 2010       | Duloxetine 60-120 mg daily<br>Placebo   | 1 | 215 | 9.4%<br>(10/106) | 4.6%<br>(5/109) | RR 2.06<br>(95% CI 0.73, 5.82)  | NSS |
| <b>SNRIs</b> | Postural Decrease in Systolic Blood Pressure >25mmHg | Rowbotham 2005 | Venlafaxine 75 mg daily<br>Placebo      | 1 | 122 | 19.5%<br>(16/82) | 15.0%<br>(6/40) | RR 1.30<br>(95% CI 0.55, 3.07)  | NSS |
| <b>SNRIs</b> | Postural Decrease in Systolic Blood Pressure >25mmHg | Rowbotham 2005 | Venlafaxine 150-225 mg daily<br>Placebo | 1 | 123 | 12.2%<br>(10/82) | 12.2%<br>(5/41) | RR 1.00<br>(95% CI 0.37, 2.73)  | NSS |
| <b>SNRIs</b> | Pruritis                                             | Gao 2010       | Duloxetine 60-120 mg daily<br>Placebo   | 1 | 215 | 2.8%<br>(3/106)  | 7.3%<br>(8/109) | RR 0.39<br>(95% CI 0.11, 1.41)  | NSS |
| <b>SNRIs</b> | Sinusitis                                            | Rowbotham 2005 | Venlafaxine 75 mg daily<br>Placebo      | 1 | 122 | 2.4%<br>(2/82)   | 2.5%<br>(1/40)  | RR 0.98<br>(95% CI 0.09, 10.44) | NSS |

|              |                                          |                |                                               |   |     |                  |                  |                                        |     |
|--------------|------------------------------------------|----------------|-----------------------------------------------|---|-----|------------------|------------------|----------------------------------------|-----|
| <b>SNRIs</b> | Sinusitis                                | Rowbotham 2005 | Venlafaxine<br>150-225 mg<br>daily<br>Placebo | 1 | 123 | 7.3%<br>(6/82)   | 2.4%<br>(1/41)   | RR 3.00<br>(95% CI<br>0.37,<br>24.10)  | NSS |
| <b>SNRIs</b> | Stomach<br>Discomfort                    | Gao 2010       | Duloxetine 60-<br>120 mg daily<br>Placebo     | 1 | 215 | 6.6%<br>(7/106)  | 4.6%<br>(5/109)  | RR 1.44<br>(95% CI<br>0.47, 4.40)      | NSS |
| <b>SNRIs</b> | Treatment-<br>emergent adverse<br>events | Rowbotham 2005 | Venlafaxine 75<br>mg daily<br>Placebo         | 1 | 122 | 87.8%<br>(72/82) | 77.5%<br>(31/40) | RR 1.13<br>(95% CI<br>0.94, 1.36)      | NSS |
| <b>SNRIs</b> | WBC Increased                            | Yasuda 2011    | Duloxetine 40<br>mg daily<br>Placebo          | 1 | 168 | 4.7%<br>(4/85)   | 2.4%<br>(2/83)   | RR 1.95<br>(95% CI<br>0.37,<br>10.38)  | NSS |
| <b>SNRIs</b> | WBC Increased                            | Yasuda 2011    | Duloxetine 60<br>mg daily<br>Placebo          | 1 | 170 | 5.8%<br>(5/86)   | 2.4%<br>(2/84)   | RR 2.44<br>(95% CI<br>0.49,<br>12.24)  | NSS |
| <b>SNRIs</b> | Weakness                                 | Goldstein 2005 | Duloxetine 20<br>mg daily<br>Placebo          | 1 | 153 | 0.87%<br>(1/115) | 0%<br>(0/38)     | RR 1.01<br>(95% CI<br>0.04,<br>24.26)  | NSS |
| <b>SNRIs</b> | Weakness                                 | Goldstein 2005 | Duloxetine 60<br>mg daily<br>Placebo          | 1 | 152 | 2.6%<br>(3/114)  | 0%<br>(0/38)     | RR 2.37<br>(95% CI<br>0.13,<br>44.95)  | NSS |
| <b>SNRIs</b> | Weakness                                 | Goldstein 2005 | Duloxetine<br>120 mg daily<br>Placebo         | 1 | 152 | 7.1%<br>(8/113)  | 0%<br>(0/39)     | RR 5.96<br>(95% CI<br>0.35,<br>101.02) | NSS |
| <b>SNRIs</b> | Weight Decreased                         | Allen 2014     | Desvenlafaxine<br>50 mg daily<br>Placebo      | 1 | 85  | 0%<br>(0/63)     | 0%<br>(0/22)     | -                                      | -   |
| <b>SNRIs</b> | Weight Decreased                         | Allen 2014     | Desvenlafaxine<br>100 mg daily<br>Placebo     | 1 | 109 | 0%<br>(0/87)     | 0%<br>(0/22)     | -                                      | -   |

|              |                  |            |                                                                                                      |   |     |                 |                 |                                       |     |
|--------------|------------------|------------|------------------------------------------------------------------------------------------------------|---|-----|-----------------|-----------------|---------------------------------------|-----|
| <b>SNRIs</b> | Weight Decreased | Allen 2014 | Desvenlafaxine<br>200 mg daily<br>Placebo                                                            | 1 | 122 | 1.0%<br>(1/99)  | 0%<br>(0/23)    | RR 0.72<br>(95% CI<br>0.03,<br>17.13) | NSS |
| <b>SNRIs</b> | Weight Decreased | Allen 2014 | Desvenlafaxine<br>400 mg daily<br>Placebo                                                            | 1 | 92  | 5.8%<br>(4/69)  | 0%<br>(0/23)    | RR 3.09<br>(95% CI<br>0.17,<br>55.23) | NSS |
| <b>TCAs</b>  | Dizziness        | Achar 2010 | Amitriptyline<br>25 mg daily +<br>Pregabalin 75<br>mg twice daily<br>Pregabalin 75<br>mg twice daily | 1 | 30  | 33.3%<br>(5/15) | 26.7%<br>(4/15) | RR 1.25<br>(95% CI<br>0.41, 3.77)     | NSS |
| <b>TCAs</b>  | Drowsiness       | Achar 2010 | Amitriptyline<br>25 mg daily +<br>Pregabalin 75<br>mg twice daily<br>Pregabalin 75<br>mg twice daily | 1 | 30  | 33.3%<br>(5/15) | 26.7%<br>(4/15) | RR 1.25<br>(95% CI<br>0.41, 3.77)     | NSS |
| <b>TCAs</b>  | Dry Mouth        | Achar 2010 | Amitriptyline<br>25 mg daily +<br>Pregabalin 75<br>mg twice daily<br>Pregabalin 75<br>mg twice daily | 1 | 30  | 46.7%<br>(7/15) | 33.3%<br>(5/15) | RR 1.40<br>(95% CI<br>0.57, 3.43)     | NSS |

\*PEER calculated using [medcalc.org/calc/relative\\_risk.php](http://medcalc.org/calc/relative_risk.php);

ALT: Alanine Aminotransferase; AST: Aspartate Aminotransferase; CI: Confidence Interval; CK: Creatine Phosphokinase; COPD: Chronic Obstructive Pulmonary Disease; ECG: Electrocardiogram; GGT: Gamma-Glutamyl Transferase; HbA1c: Glycosylated Hemoglobin; LDH: Lactate Dehydrogenase; MSK: Musculoskeletal; NNT: Number Needed to Treat; NSS: Not Statistically Significant; OA: Osteoarthritis; PHN: Postherpetic Neuralgia; RCTs: Randomized Controlled Trials; RR: Risk Ratio; SAE: Serious Adverse Event; SNRIs: Serotonin–Norepinephrine Reuptake Inhibitors; TCAs: Tricyclic Antidepressants; WBC = White Blood Cell

**Table 12: Individual Meta-Analyzed Adverse Events**

| Intervention Type                   | Type of Adverse Event  | Randomized Controlled Trials                                                                                                              | # of RCTs | # of Participants | Intervention Event Rate | Control Event Rate | Risk Ratio (95% Confidence Interval) | NNH |
|-------------------------------------|------------------------|-------------------------------------------------------------------------------------------------------------------------------------------|-----------|-------------------|-------------------------|--------------------|--------------------------------------|-----|
| <b>Anticonvulsants (Gabapentin)</b> | Dizziness              | Backonja 1998<br>Backonja 2011<br>Rauck 2012<br>Rice 2001<br>Rowbotham 1998<br>Sandercock 2012<br>Sang 2013<br>Wallace 2010<br>Zhang 2013 | 9         | 2477              | 19%<br>(300/1566)       | 11%<br>(102/911)   | RR 3.18 (95% CI 2.41, 4.20)          | 13  |
| <b>Anticonvulsants (Gabapentin)</b> | Peripheral Edema       | Rauck 2012<br>Rice 2001<br>Rowbotham 1998<br>Sang 2013<br>Wallace 2010<br>Zhang 2013                                                      | 6         | 2115              | 6%<br>(79/1339)         | 1%<br>(8/776)      | RR 3.83 (95% CI 2.08, 7.04)          | 21  |
| <b>Anticonvulsants (Gabapentin)</b> | Somnolence and Fatigue | Backonja 1998<br>Backonja 2011<br>Rauck 2012<br>Rice 2001<br>Rowbotham 1998<br>Sandercock 2012<br>Sang 2013<br>Wallace 2010<br>Zhang 2013 | 9         | 2528              | 13%<br>(211/1566)       | 5%<br>(47/962)     | RR 2.60 (95% CI 1.92, 3.53)          | 12  |
| <b>Anticonvulsants (Gabapentin)</b> | Arthralgia             | Rauck 2012<br>Zhang 2013                                                                                                                  | 2         | 695               | 4%<br>(21/510)          | 3%<br>(6/185)      | RR 1.23 (95% CI 0.50, 3.03)          | NSS |
| <b>Anticonvulsants (Gabapentin)</b> | Back Pain              | Rauck 2012<br>Zhang 2013                                                                                                                  | 2         | 695               | 3%<br>(15/510)          | 3%<br>(5/185)      | RR 1.00 (95% CI 0.38, 2.63)          | NSS |
| <b>Anticonvulsants (Gabapentin)</b> | Blurred Vision         | Rauck 2012<br>Zhang 2013                                                                                                                  | 2         | 695               | 3%<br>(13/510)          | 2%<br>(3/185)      | RR 1.17 (95% CI 0.43, 3.19)          | NSS |
| <b>Anticonvulsants (Gabapentin)</b> | Constipation           | Rauck 2012<br>Zhang 2013                                                                                                                  | 2         | 695               | 5%<br>(26/510)          | 4%<br>(8/185)      | RR 1.20 (95% CI 0.55, 2.61)          | NSS |

|                                        |                         |                                                                                                            |   |      |                 |                 |                              |     |
|----------------------------------------|-------------------------|------------------------------------------------------------------------------------------------------------|---|------|-----------------|-----------------|------------------------------|-----|
| <b>Anticonvulsants (Gabapentin)</b>    | Diarrhea                | Backonja 1998<br>Backonja 2011<br>Rauck 2012<br>Rice 2001<br>Zhang 2013                                    | 5 | 1295 | 6%<br>(49/864)  | 4%<br>(18/431)  | RR 1.43 (95% CI 0.85, 2.41)  | NSS |
| <b>Anticonvulsants (Gabapentin)</b>    | Dry Mouth               | Rauck 2012<br>Rice 2001<br>Zhang 2013                                                                      | 3 | 1029 | 4%<br>(26/733)  | 2%<br>(6/296)   | RR 1.60 (95% CI 0.73, 3.51)  | NSS |
| <b>Anticonvulsants (Gabapentin)</b>    | Headache                | Backonja 1998<br>Backonja 2011<br>Rauck 2012<br>Sandercock 2012<br>Sang 2013<br>Wallace 2010<br>Zhang 2013 | 7 | 1965 | 6%<br>(78/1230) | 5%<br>(40/735)  | RR 1.11 (95% CI 0.77, 1.61)  | NSS |
| <b>Anticonvulsants (Gabapentin)</b>    | Increased Weight        | Rauck 2012<br>Zhang 2013                                                                                   | 2 | 695  | 4%<br>(18/510)  | 0.5%<br>(1/185) | RR 2.37 (95% CI 0.71, 7.87)  | NSS |
| <b>Anticonvulsants (Gabapentin)</b>    | Insomnia                | Backonja 2011<br>Zhang 2013                                                                                | 2 | 472  | 4%<br>(13/323)  | 4%<br>(6/149)   | RR 0.97 (95% CI 0.34, 2.74)  | NSS |
| <b>Anticonvulsants (Gabapentin)</b>    | Nasopharyngitis         | Rauck 2012<br>Sang 2013<br>Zhang 2013                                                                      | 3 | 1147 | 3%<br>(25/731)  | 3%<br>(14/416)  | RR 0.88 (95% CI 0.45, 1.72)  | NSS |
| <b>Anticonvulsants (Gabapentin)</b>    | Nausea                  | Backonja 1998<br>Backonja 2011<br>Rauck 2012<br>Sandercock 2012<br>Sang 2013<br>Zhang 2013                 | 6 | 1560 | 7%<br>(64/958)  | 5%<br>(28/602)  | RR 1.35 (95% CI 0.87, 2.08)  | NSS |
| <b>Anticonvulsants (Gabapentin)</b>    | Serious Adverse Events  | Backonja 2011<br>Rice 2001<br>Sang 2013<br>Wallace 2010<br>Zhang 2013                                      | 5 | 1663 | 2%<br>(25/1039) | 3%<br>(17/624)  | RR 0.91 (95% CI 0.48, 1.72)  | NSS |
| <b>Anticonvulsants (Gabapentin)</b>    | Urinary Tract Infection | Rauck 2012<br>Zhang 2013                                                                                   | 2 | 695  | 5%<br>(24/510)  | 3%<br>(6/185)   | RR 1.43 (95% CI 0.59, 3.48)  | NSS |
| <b>Anticonvulsants (Oxcarbazepine)</b> | Back Pain               | CTR1476G2301<br>Dogra 2005                                                                                 | 2 | 266  | 8%<br>(10/126)  | 2%<br>(3/140)   | RR 3.82 (95% CI 1.06, 13.71) | 18  |

|                                        |                        |                                                                                                                                        |   |      |                 |                 |                              |     |
|----------------------------------------|------------------------|----------------------------------------------------------------------------------------------------------------------------------------|---|------|-----------------|-----------------|------------------------------|-----|
| <b>Anticonvulsants (Oxcarbazepine)</b> | Dizziness              | Beydoun 2006<br>CTRI476G2301<br>Dogra 2005                                                                                             | 3 | 610  | 19%<br>(74/381) | 3%<br>(8/229)   | RR 5.24 (95% CI 2.54, 10.80) | 7   |
| <b>Anticonvulsants (Oxcarbazepine)</b> | Headache               | Beydoun 2006<br>CTRI476G2301<br>Dogra 2005                                                                                             | 3 | 610  | 11%<br>(41/381) | 5%<br>(12/229)  | RR 1.83 (95% CI 1.00, 3.37)  | 19  |
| <b>Anticonvulsants (Oxcarbazepine)</b> | Nausea                 | Beydoun 2006<br>CTRI476G2301<br>Dogra 2005                                                                                             | 3 | 610  | 13%<br>(49/381) | 3%<br>(7/229)   | RR 3.62 (95% CI 1.73, 7.59)  | 11  |
| <b>Anticonvulsants (Oxcarbazepine)</b> | Serious Adverse Events | Beydoun 2006<br>CTRI476G2301<br>Dogra 2005                                                                                             | 3 | 631  | 8%<br>(33/395)  | 3%<br>(6/236)   | RR 3.05 (95% CI 1.32, 7.06)  | 18  |
| <b>Anticonvulsants (Oxcarbazepine)</b> | Somnolence or Fatigue  | Beydoun 2006<br>CTRI476G2301<br>Dogra 2005                                                                                             | 3 | 610  | 15%<br>(57/381) | 5%<br>(11/229)  | RR 2.41 (95% CI 1.33, 4.34)  | 10  |
| <b>Anticonvulsants (Oxcarbazepine)</b> | Diarrhea               | CTRI476G2301<br>Dogra 2005                                                                                                             | 2 | 266  | 4%<br>(5/126)   | 6%<br>(8/140)   | RR 0.67 (95% CI 0.22, 2.05)  | NSS |
| <b>Anticonvulsants (Oxcarbazepine)</b> | Tremor                 | Beydoun 2006<br>Dogra 2005                                                                                                             | 2 | 469  | 5%<br>(15/310)  | 2%<br>(3/159)   | RR 2.01 (95% CI 0.63, 6.39)  | NSS |
| <b>Anticonvulsants (Pregabalin)</b>    | Abnormal Coordination  | Baba 2020<br>Dworkin 2003<br>Stacey 2008<br>Van-Seventer 2006                                                                          | 4 | 983  | 4%<br>(26/628)  | 0.6%<br>(2/355) | RR 4.09 (95% CI 1.45, 11.52) | 28  |
| <b>Anticonvulsants (Pregabalin)</b>    | Amblyopia              | Dworkin 2003<br>Lesser 2004<br>Richter 2005<br>Rosenstock 2004<br>Van-Seventer 2006                                                    | 5 | 1270 | 5%<br>(46/841)  | 2%<br>(9/429)   | RR 2.32 (95% CI 1.23, 4.35)  | 30  |
| <b>Anticonvulsants (Pregabalin)</b>    | Asthenia               | Arezzo 2008<br>Freynhagen 2005<br>Lesser 2004<br>Richter 2005<br>Rosenstock 2004<br>Sabatowski 2004<br>Tolle 2008<br>Van-Seventer 2006 | 8 | 2235 | 6%<br>(87/1563) | 3%<br>(18/672)  | RR 1.88 (95% CI 1.17, 3.02)  | 35  |



|                                     |                  |                                                                                                                                                                                                                                            |    |      |                   |                  |                              |    |
|-------------------------------------|------------------|--------------------------------------------------------------------------------------------------------------------------------------------------------------------------------------------------------------------------------------------|----|------|-------------------|------------------|------------------------------|----|
| <b>Anticonvulsants (Pregabalin)</b> | Ataxia           | Arezzo 2008<br>Dworkin 2003<br>Lesser 2004<br>Van-Seventer 2006                                                                                                                                                                            | 4  | 1045 | 7%<br>(45/686)    | 0.6%<br>(2/359)  | RR 4.55 (95% CI 1.86, 11.09) | 17 |
| <b>Anticonvulsants (Pregabalin)</b> | Balance Disorder | Stacey 2008<br>Vinik 2014                                                                                                                                                                                                                  | 2  | 427  | 4%<br>(9/229)     | 0%<br>(0/198)    | RR 5.35 (95% CI 1.01, 28.42) | 26 |
| <b>Anticonvulsants (Pregabalin)</b> | Confusion        | Dworkin 2003<br>Lesser 2004<br>Stacey 2008<br>Van-Seventer 2006                                                                                                                                                                            | 4  | 1147 | 4%<br>(32/783)    | 0.8%<br>(3/364)  | RR 2.54 (95% CI 1.14, 5.65)  | 31 |
| <b>Anticonvulsants (Pregabalin)</b> | Constipation     | Huffman 2015<br>Lesser 2004<br>Liu 2017<br>McDonnell 2018<br>NCT00394901 2006<br>Rauck 2012<br>Richter 2005<br>Rosenstock 2004<br>Satoh 2011<br>Smith 2014<br>Van-Seventer 2006<br>Vinik 2014<br>Ziegler 2015                              | 13 | 3054 | 5%<br>(99/1843)   | 3%<br>(32/1211)  | RR 1.56 (95% CI 1.05, 2.32)  | 37 |
| <b>Anticonvulsants (Pregabalin)</b> | Dizziness        | Arezzo 2008<br>Baba 2020<br>Dworkin 2003<br>Freyenhagen 2005<br>Guan 2011<br>Huffman 2015<br>Lesser 2004<br>Liu 2017<br>McDonnell 2018<br>Mu 2018<br>NCT00394901 2006<br>NCT02215252 2014<br>Rauck 2012<br>Richter 2005<br>Rosenstock 2004 | 22 | 5696 | 20%<br>(687/3503) | 6%<br>(122/2193) | RR 3.25 (95% CI 2.69, 3.92)  | 8  |

|                                     |                   |                                                                                                                                                                                              |    |      |                   |                 |                              |    |
|-------------------------------------|-------------------|----------------------------------------------------------------------------------------------------------------------------------------------------------------------------------------------|----|------|-------------------|-----------------|------------------------------|----|
|                                     |                   | Sabatowski 2004<br>Satoh 2011<br>Smith 2014<br>Stacey 2008<br>Tolle 2008<br>Van-Seventer 2006<br>Vinik 2014                                                                                  |    |      |                   |                 |                              |    |
| <b>Anticonvulsants (Pregabalin)</b> | Dry Mouth         | Achar 2010<br>Arezzo 2008<br>Dworkin 2003<br>Freyenhagen 2005<br>Huffman 2015<br>Lesser 2004<br>Liu 2017<br>Rauck 2012<br>Richter 2005<br>Sabatowski 2004<br>Tolle 2008<br>Van-Seventer 2006 | 12 | 2992 | 6%<br>(111/1966)  | 2%<br>(23/1026) | RR 2.24 (95% CI 1.49, 3.38)  | 30 |
| <b>Anticonvulsants (Pregabalin)</b> | Euphoria          | Arezzo 2008<br>Lesser 2004<br>Rosenstock 2004<br>Stacey 2008                                                                                                                                 | 4  | 919  | 3%<br>(20/577)    | 0%<br>(0/342)   | RR 4.51 (95% CI 1.39, 14.60) | 29 |
| <b>Anticonvulsants (Pregabalin)</b> | Generalized Edema | Arezzo 2008<br>Guan 2011<br>Satoh 2011<br>Tolle 2008<br>Van-Seventer 2006                                                                                                                    | 5  | 1552 | 5%<br>(54/1041)   | 1%<br>(6/511)   | RR 3.03 (95% CI 1.48, 6.19)  | 25 |
| <b>Anticonvulsants (Pregabalin)</b> | Peripheral Edema  | Arezzo 2008<br>Baba 2020<br>Dworkin 2003<br>Freyenhagen 2005<br>Huffman 2015<br>Lesser 2004<br>Liu 2017<br>Mu 2018<br>NCT00394901 2006<br>Rauck 2012                                         | 20 | 5338 | 10%<br>(320/3275) | 3%<br>(69/2063) | RR 2.68 (95% CI 2.09, 3.44)  | 16 |

|                                         |                           |                                                                                                                                                                                                                                                                                                                                     |    |      |                   |                 |                                |    |
|-----------------------------------------|---------------------------|-------------------------------------------------------------------------------------------------------------------------------------------------------------------------------------------------------------------------------------------------------------------------------------------------------------------------------------|----|------|-------------------|-----------------|--------------------------------|----|
|                                         |                           | Richter 2005<br>Rosenstock 2004<br>Sabatowski 2004<br>Satoh 2011<br>Smith 2014<br>Stacey 2008<br>Tolle 2008<br>Van-Seventer 2006<br>Vinik 2014<br>Ziegler 2015                                                                                                                                                                      |    |      |                   |                 |                                |    |
| <b>Anticonvulsants<br/>(Pregabalin)</b> | Somnolence and<br>Fatigue | Arezzo 2008<br>Baba 2020<br>Dworkin 2003<br>Freyenhagen 2005<br>Guan 2011<br>Huffman 2015<br>Lesser 2004<br>Liu 2017<br>Mu 2018<br>NCT00394901 2006<br>Rauck 2012<br>Richter 2005<br>Rosenstock 2004<br>Sabatowski 2004<br>Satoh 2011<br>Smith 2014<br>Stacey 2008<br>Tolle 2008<br>Van-Seventer 2006<br>Vinik 2014<br>Ziegler 2015 | 21 | 5646 | 15%<br>(507/3481) | 4%<br>(90/2165) | RR 3.38 (95% CI 2.71,<br>4.21) | 10 |
| <b>Anticonvulsants<br/>(Pregabalin)</b> | Vertigo                   | Freyenhagen 2005<br>Stacey 2008<br>Tolle 2008                                                                                                                                                                                                                                                                                       | 3  | 1002 | 6%<br>(43/751)    | 0.4%<br>(1/251) | RR 3.56 (95% CI 1.29,<br>9.85) | 19 |
| <b>Anticonvulsants<br/>(Pregabalin)</b> | Weight Gain               | Arezzo 2008<br>Baba 2020<br>Freyenhagen 2005<br>Guan 2011                                                                                                                                                                                                                                                                           | 13 | 3283 | 8%<br>(161/2073)  | 1%<br>(12/1210) | RR 4.84 (95% CI 2.94,<br>7.95) | 15 |

|                                     |                          |                                                                                                                                                                                              |    |      |                 |                 |                              |     |
|-------------------------------------|--------------------------|----------------------------------------------------------------------------------------------------------------------------------------------------------------------------------------------|----|------|-----------------|-----------------|------------------------------|-----|
|                                     |                          | Huffman 2015<br>McDonnell 2018<br>NCT003934901 2006<br>Rauck 2012<br>Richter 2005<br>Satoh 2011<br>Stacey 2008<br>Van-Seventer 2006<br>Vinik 2014                                            |    |      |                 |                 |                              |     |
| <b>Anticonvulsants (Pregabalin)</b> | Abnormal Thinking        | Arezzo 2008<br>Van-Seventer 2006                                                                                                                                                             | 2  | 535  | 3%<br>(11/357)  | 0.6%<br>(1/178) | RR 2.35 (95% CI 0.65, 8.49)  | NSS |
| <b>Anticonvulsants (Pregabalin)</b> | Amnesia                  | Lesser 2004<br>Stacey 2008                                                                                                                                                                   | 2  | 606  | 2%<br>(9/419)   | 0.5%<br>(1/187) | RR 2.17 (95% CI 0.49, 9.71)  | NSS |
| <b>Anticonvulsants (Pregabalin)</b> | Back Pain                | McDonnell 2018<br>NCT00394901 2006<br>Rauck 2012                                                                                                                                             | 3  | 559  | 1%<br>(5/386)   | 0.6%<br>(1/173) | RR 1.60 (95% CI 0.34, 7.57)  | NSS |
| <b>Anticonvulsants (Pregabalin)</b> | Contusion                | NCT00394901 2006<br>Stacey 2008                                                                                                                                                              | 2  | 640  | 3%<br>(14/452)  | 1%<br>(2/188)   | RR 1.92 (95% CI 0.57, 6.51)  | NSS |
| <b>Anticonvulsants (Pregabalin)</b> | Diarrhea                 | Dworkin 2003<br>Huffman 2015<br>Lesser 2004<br>Liu 2017<br>Rauck 2012<br>Richter 2005<br>Rosenstock 2004<br>Sabatowski 2004<br>Smith 2014<br>Van-Seventer 2006<br>Vinik 2014<br>Ziegler 2015 | 12 | 2689 | 3%<br>(55/1591) | 3%<br>(38/1098) | RR 0.95 (95% CI 0.64, 1.42)  | NSS |
| <b>Anticonvulsants (Pregabalin)</b> | Diplopia                 | NCT0039401 2006<br>Stacey 2008<br>Van-Seventer 2006                                                                                                                                          | 3  | 1008 | 2%<br>(15/727)  | 0%<br>(0/281)   | RR 2.81 (95% CI 0.75, 10.52) | NSS |
| <b>Anticonvulsants (Pregabalin)</b> | Disturbance in Attention | Rauck 2012<br>Smith 2014                                                                                                                                                                     | 2  | 287  | 3%<br>(5/164)   | 0.8%<br>(1/123) | RR 2.28 (95% CI 0.41, 12.78) | NSS |
| <b>Anticonvulsants (Pregabalin)</b> | Facial Edema             | NCT00394901 2006<br>Satoh 2011                                                                                                                                                               | 3  | 1053 | 3%<br>(25/727)  | 0.6%<br>(2/326) | RR 2.36 (95% CI 0.93, 5.98)  | NSS |

|                                     |                    |                                                                                                                                                                                                                                                                                           |    |      |                  |                 |                              |     |
|-------------------------------------|--------------------|-------------------------------------------------------------------------------------------------------------------------------------------------------------------------------------------------------------------------------------------------------------------------------------------|----|------|------------------|-----------------|------------------------------|-----|
|                                     |                    | Van-Seventer 2006                                                                                                                                                                                                                                                                         |    |      |                  |                 |                              |     |
| <b>Anticonvulsants (Pregabalin)</b> | Falls              | NCT00394901 2006<br>Rauck 2012<br>Stacey 2008<br>Vinik 2014                                                                                                                                                                                                                               | 4  | 894  | 4%<br>(21/568)   | 2%<br>(5/326)   | RR 1.67 (95% CI 0.68, 4.10)  | NSS |
| <b>Anticonvulsants (Pregabalin)</b> | Flatulence         | Rosenstock 2004<br>Van-Seventer 2006                                                                                                                                                                                                                                                      | 2  | 514  | 2%<br>(7/351)    | 2%<br>(3/163)   | RR 0.99 (95% CI 0.32, 3.03)  | NSS |
| <b>Anticonvulsants (Pregabalin)</b> | Headache           | Baba 2020<br>Dworkin 2003<br>Freyenhagen 2005<br>Huffman 2015<br>Lesser 2004<br>McDonnell 2018<br>NCT00394901 2006<br>NCT02215252 2014<br>Rauck 2012<br>Richter 2005<br>Rosenstock 2004<br>Sabatowski 2004<br>Smith 2014<br>Tolle 2008<br>Van-Seventer 2006<br>Vinik 2014<br>Ziegler 2015 | 17 | 3928 | 5%<br>(134/2502) | 6%<br>(81/1426) | RR 0.97 (95% CI 0.73, 1.27)  | NSS |
| <b>Anticonvulsants (Pregabalin)</b> | Hyperglycemia      | Rosenstock 2004<br>Vinik 2014                                                                                                                                                                                                                                                             | 2  | 304  | 2%<br>(3/126)    | 0.6%<br>(1/178) | RR 2.74 (95% CI 0.41, 18.48) | NSS |
| <b>Anticonvulsants (Pregabalin)</b> | Increased Appetite | Rauck 2012<br>Stacey 2008                                                                                                                                                                                                                                                                 | 2  | 365  | 3%<br>(7/245)    | 2%<br>(2/120)   | RR 1.45 (95% CI 0.35, 5.98)  | NSS |
| <b>Anticonvulsants (Pregabalin)</b> | Increased Pain     | Huffman 2015<br>Lesser 2004<br>Rauck 2012<br>Richter 2005<br>Van-Seventer 2006                                                                                                                                                                                                            | 5  | 1431 | 4%<br>(36/940)   | 3%<br>(16/491)  | RR 1.04 (95% CI 0.60, 1.80)  | NSS |
| <b>Anticonvulsants (Pregabalin)</b> | Increased Sweating | Stacey 2008<br>Van-Seventer 2006                                                                                                                                                                                                                                                          | 2  | 637  | 0.7%<br>(3/454)  | 2%<br>(4/183)   | RR 0.36 (95% CI 0.11, 1.11)  | NSS |
| <b>Anticonvulsants (Pregabalin)</b> | Infection          | Lesser 2004<br>Richter 2005                                                                                                                                                                                                                                                               | 5  | 1125 | 7%<br>(51/684)   | 6%<br>(27/441)  | RR 1.34 (95% CI 0.86, 2.09)  | NSS |

|                                     |                        |                                                                                                                                                                              |    |      |                 |                 |                             |     |
|-------------------------------------|------------------------|------------------------------------------------------------------------------------------------------------------------------------------------------------------------------|----|------|-----------------|-----------------|-----------------------------|-----|
|                                     |                        | Rosenstock 2004<br>Sabatowski 2004<br>Vinik 2014                                                                                                                             |    |      |                 |                 |                             |     |
| <b>Anticonvulsants (Pregabalin)</b> | Injury                 | Lesser 2004<br>Richter 2005<br>Rosenstock 2004<br>Vinik 2014                                                                                                                 | 4  | 887  | 5%<br>(26/527)  | 5%<br>(17/360)  | RR 1.15 (95% CI 0.61, 2.17) | NSS |
| <b>Anticonvulsants (Pregabalin)</b> | Lethargy               | Guan 2011<br>Stacey 2008                                                                                                                                                     | 2  | 577  | 5%<br>(18/385)  | 2%<br>(3/192)   | RR 2.63 (95% CI 0.86, 8.09) | NSS |
| <b>Anticonvulsants (Pregabalin)</b> | Muscle Spasms          | Rauck 2012<br>Ziegler 2015                                                                                                                                                   | 2  | 228  | 4%<br>(6/136)   | 2%<br>(2/92)    | RR 1.93 (95% CI 0.41, 9.14) | NSS |
| <b>Anticonvulsants (Pregabalin)</b> | Nasopharyngitis        | Baba 2020<br>Liu 2017<br>NCT00394901 2006<br>Rauck 2012<br>Smith 2014<br>Ziegler 2015                                                                                        | 6  | 1183 | 5%<br>(36/703)  | 6%<br>(27/480)  | RR 0.74 (95% CI 0.45, 1.21) | NSS |
| <b>Anticonvulsants (Pregabalin)</b> | Nausea                 | Freyenhagen 2005<br>Huffman 2015<br>McDonnell 2018<br>NCT00394901 2006<br>NCT02215252 2014<br>Rauck 2012<br>Rosenstock 2004<br>Smith 2014<br>Van-Seventer 2006<br>Vinik 2014 | 10 | 2234 | 4%<br>(62/1401) | 4%<br>(32/833)  | RR 1.01 (95% CI 0.65, 1.55) | NSS |
| <b>Anticonvulsants (Pregabalin)</b> | Serious Adverse Events | Arezzo 2008<br>Guan 2011<br>Huffman 2015<br>Lesser 2004<br>Liu 2017<br>McDonnell 2018<br>Moon 2010<br>Mu 2018<br>NCT00394901 2006<br>NCT02215252 2014<br>Satoh 2011          | 16 | 4290 | 3%<br>(88/2553) | 3%<br>(54/1737) | RR 1.01 (95% CI 0.73, 1.41) | NSS |

|                                     |                                   |                                                                             |   |      |                  |                 |                              |     |
|-------------------------------------|-----------------------------------|-----------------------------------------------------------------------------|---|------|------------------|-----------------|------------------------------|-----|
|                                     |                                   | Smith 2014<br>Stacey 2008<br>Tolle 2008<br>Vinik 2014<br>Ziegler 2015       |   |      |                  |                 |                              |     |
| <b>Anticonvulsants (Pregabalin)</b> | Upper Respiratory Tract Infection | Huffman 2015<br>NCT02215252 2014                                            | 2 | 475  | 2%<br>(6/244)    | 5%<br>(11/231)  | RR 0.52 (95% CI 0.19, 1.38)  | NSS |
| <b>Anticonvulsants (Pregabalin)</b> | Urinary Tract Infection           | Mu 2018<br>Rauck 2012<br>Smith 2014<br>Vinik 2014<br>Ziegler 2015           | 5 | 1199 | 4%<br>(21/598)   | 5%<br>(28/601)  | RR 0.76 (95% CI 0.44, 1.31)  | NSS |
| <b>Anticonvulsants (Pregabalin)</b> | Vision Problems                   | Huffman 2015<br>Rauck 2012<br>Van-Seventer 2006<br>Vinik 2014<br>Zhang 2013 | 5 | 1377 | 3%<br>(23/865)   | 1.0%<br>(5/512) | RR 1.95 (95% CI 0.85, 4.47)  | NSS |
| <b>Anticonvulsants (Pregabalin)</b> | Vomiting                          | Baba 2020<br>Rauck 2012<br>Rosenstock 2004<br>Vinik 2014                    | 4 | 573  | 4%<br>(8/227)    | 2%<br>(7/296)   | RR 1.29 (95% CI 0.48, 3.46)  | NSS |
| <b>Opioids</b>                      | Constipation                      | Freeman 2007<br>Hanna 2008<br>Jensen 2006<br>NCT01124617 2010<br>Zin 2010   | 5 | 963  | 24%<br>(122/500) | 7%<br>(31/463)  | RR 3.72 (95% CI 2.58, 5.35)  | 6   |
| <b>Opioids</b>                      | Dizziness                         | Freeman 2007<br>Hanna 2008<br>Jensen 2006<br>NCT01124617 2010<br>Zin 2010   | 5 | 963  | 18%<br>(88/500)  | 8%<br>(35/463)  | RR 2.49 (95% CI 1.78, 3.50)  | 10  |
| <b>Opioids</b>                      | Dry Mouth                         | Jensen 2006<br>NCT01124617 2010                                             | 2 | 250  | 10%<br>(14/142)  | 2%<br>(2/108)   | RR 5.01 (95% CI 1.38, 18.25) | 13  |
| <b>Opioids</b>                      | Nausea                            | Freeman 2007<br>Hanna 2008<br>Jensen 2006                                   | 5 | 963  | 25%<br>(124/500) | 8%<br>(37/463)  | RR 3.15 (95% CI 2.23, 4.45)  | 6   |

|                     |                                      |                                                                           |   |      |                  |                  |                                |     |
|---------------------|--------------------------------------|---------------------------------------------------------------------------|---|------|------------------|------------------|--------------------------------|-----|
|                     |                                      | NCT01124617 2010<br>Zin 2010                                              |   |      |                  |                  |                                |     |
| <b>Opioids</b>      | Pruritus                             | Jensen 2006<br>NCT01124617 2010<br>Zin 2010                               | 3 | 312  | 16%<br>(27/171)  | 4%<br>(6/141)    | RR 3.68 (95% CI 1.68,<br>8.06) | 9   |
| <b>Opioids</b>      | Somnolence and<br>Fatigue            | Freeman 2007<br>Hanna 2008<br>Jensen 2006<br>NCT01124617 2010<br>Zin 2010 | 5 | 963  | 27%<br>(137/500) | 8%<br>(36/463)   | RR 3.54 (95% CI 2.52,<br>4.97) | 6   |
| <b>Opioids</b>      | Vomiting                             | Hanna 2008<br>Jensen 2006<br>NCT01124617 2010<br>Zin 2010                 | 4 | 650  | 14%<br>(48/340)  | 4%<br>(12/310)   | RR 3.58 (95% CI 1.90,<br>6.72) | 11  |
| <b>Opioids</b>      | Asthenia                             | Jensen 2006<br>NCT01124617 2010                                           | 2 | 250  | 8%<br>(12/142)   | 6%<br>(6/108)    | RR 1.68 (95% CI 0.70,<br>4.06) | NSS |
| <b>Opioids</b>      | Diarrhea                             | Freeman 2007<br>NCT01124617 2010<br>Zin 2010                              | 3 | 466  | 5%<br>(13/249)   | 4%<br>(8/217)    | RR 1.36 (95% CI 0.57,<br>3.26) | NSS |
| <b>Opioids</b>      | Generalized Pain                     | Freeman 2007<br>NCT01124617 2010                                          | 2 | 404  | 2%<br>(4/220)    | 5%<br>(9/184)    | RR 0.38 (95% CI 0.12,<br>1.24) | NSS |
| <b>Opioids</b>      | Headache                             | Freeman 2007<br>Hanna 2008<br>Jensen 2006<br>NCT01124617 2010<br>Zin 2010 | 5 | 963  | 9%<br>(45/500)   | 12%<br>(54/463)  | RR 0.79 (95% CI 0.55,<br>1.15) | NSS |
| <b>Opioids</b>      | Serious Adverse<br>Events            | Freeman 2007<br>Jensen 2006<br>NCT01124617 2010<br>Simpson 2016           | 4 | 749  | 6%<br>(24/395)   | 7%<br>(25/354)   | RR 0.85 (95% CI 0.50,<br>1.46) | NSS |
| <b>Opioids</b>      | Upper Respiratory<br>Tract Infection | Freeman 2007<br>NCT01124617 2010                                          | 2 | 404  | 5%<br>(10/220)   | 4%<br>(8/184)    | RR 1.11 (95% CI 0.46,<br>2.71) | NSS |
| <b>Rubefacients</b> | Application Site<br>Pain             | Backonja 2008<br>Capsaicin Study Group<br>1992                            | 5 | 1619 | 35%<br>(292/843) | 15%<br>(117/776) | RR 2.38 (95% CI 1.99,<br>2.84) | 6   |



|                     |                                                     |                                                                                                                            |   |      |                  |                  |                              |     |
|---------------------|-----------------------------------------------------|----------------------------------------------------------------------------------------------------------------------------|---|------|------------------|------------------|------------------------------|-----|
|                     |                                                     | Irving 2011<br>Simpson 2017<br>Webster 2010                                                                                |   |      |                  |                  |                              |     |
| <b>Rubefacients</b> | Coughing and/or Sneezing                            | Capsaicin Study Group 1992<br>Watson 1993<br>Webster 2010                                                                  | 3 | 575  | 8%<br>(26/314)   | 1%<br>(3/261)    | RR 6.85 (95% CI 2.29, 20.43) | 15  |
| <b>Rubefacients</b> | Increased Blood Pressure                            | Backonja 2008<br>Simpson 2017<br>Webster 2010                                                                              | 3 | 926  | 5%<br>(26/493)   | 2%<br>(9/433)    | RR 2.57 (95% CI 1.23, 5.35)  | 32  |
| <b>Rubefacients</b> | Local Reaction (Burning, Stinging, and/or Erythema) | Backonja 2008<br>Bernstein 1989<br>Capsaicin Study Group 1992<br>Irving 2011<br>Tandan 1992<br>Watson 1993<br>Webster 2010 | 7 | 1447 | 72%<br>(547/758) | 47%<br>(323/689) | RR 1.63 (95% CI 1.50, 1.76)  | 4   |
| <b>Rubefacients</b> | Nausea                                              | Backonja 2008<br>Irving 2011<br>Watson 1993<br>Webster 2010                                                                | 4 | 1116 | 4%<br>(26/593)   | 2%<br>(8/523)    | RR 2.73 (95% CI 1.27, 5.87)  | 36  |
| <b>Rubefacients</b> | Papules at Application Site                         | Backonja 2008<br>Irving 2011<br>Webster 2010                                                                               | 3 | 973  | 8%<br>(39/519)   | 3%<br>(13/454)   | RR 2.68 (95% CI 1.46, 4.91)  | 22  |
| <b>Rubefacients</b> | Sinusitis                                           | Backonja 2008<br>Irving 2011                                                                                               | 2 | 818  | 3%<br>(12/417)   | 0.5%<br>(2/401)  | RR 5.77 (95% CI 1.30, 25.62) | 43  |
| <b>Rubefacients</b> | Swelling at Application Site                        | Backonja 2008<br>Irving 2011<br>Webster 2010                                                                               | 3 | 973  | 7%<br>(35/519)   | 0.7%<br>(3/454)  | RR 8.24 (95% CI 2.80, 24.24) | 17  |
| <b>Rubefacients</b> | Unspecified Application Site Reaction               | Simpson 2017<br>Watson 1993                                                                                                | 2 | 512  | 29%<br>(76/260)  | 6%<br>(16/252)   | RR 4.64 (95% CI 2.79, 7.72)  | 5   |
| <b>Rubefacients</b> | Vomiting                                            | Backonja 2008<br>Irving 2011                                                                                               | 2 | 818  | 3%<br>(12/417)   | 0.7%<br>(3/401)  | RR 3.43 (95% CI 1.06, 11.14) | 47  |
| <b>Rubefacients</b> | Back Pain                                           | Backonja 2008<br>Webster 2010                                                                                              | 2 | 557  | 3%<br>(9/307)    | 2%<br>(5/250)    | RR 1.47 (95% CI 0.49, 4.38)  | NSS |

|                     |                                      |                                                                                      |   |      |                  |                 |                                  |     |
|---------------------|--------------------------------------|--------------------------------------------------------------------------------------|---|------|------------------|-----------------|----------------------------------|-----|
| <b>Rubefaciants</b> | Dizziness                            | Backonja 2008<br>Irving 2011<br>Watson 1993<br>Webster 2010                          | 4 | 1116 | 2%<br>(10/593)   | 3%<br>(15/523)  | RR 0.60 (95% CI 0.28,<br>1.28)   | NSS |
| <b>Rubefaciants</b> | Headache                             | Backonja 2008<br>Irving 2011<br>Watson 1993                                          | 3 | 961  | 3%<br>(13/491)   | 4%<br>(18/470)  | RR 0.70 (95% CI 0.35,<br>1.40)   | NSS |
| <b>Rubefaciants</b> | Nasopharyngitis                      | Backonja 2008<br>Watson 1993<br>Webster 2010                                         | 3 | 700  | 3%<br>(12/381)   | 4%<br>(12/319)  | RR 0.79 (95% CI 0.36,<br>1.71)   | NSS |
| <b>Rubefaciants</b> | Pruritus at<br>Application Site      | Backonja 2008<br>Irving 2011<br>Webster 2010                                         | 3 | 973  | 6%<br>(33/519)   | 3%<br>(15/454)  | RR 1.60 (95% CI 0.89,<br>2.89)   | NSS |
| <b>Rubefaciants</b> | Serious Adverse<br>Events            | Backonja 2008<br>Irving 2011<br>Simpson 2017<br>Vinik 2015<br>Webster 2010           | 5 | 1810 | 6%<br>(63/1018)  | 4%<br>(32/792)  | RR 1.38 (95% CI 0.90,<br>2.11)   | NSS |
| <b>Rubefaciants</b> | Upper Respiratory<br>Tract Infection | Irving 2011<br>Watson 1993<br>Webster 2010                                           | 3 | 714  | 3%<br>(12/388)   | 2%<br>(8/326)   | RR 1.29 (95% CI 0.56,<br>2.97)   | NSS |
| <b>SNRIs</b>        | Anorexia                             | Gao 2010<br>Goldstein 2005<br>Rowbotham 2005                                         | 3 | 917  | 6%<br>(36/612)   | 2%<br>(5/305)   | RR 3.40 (95% CI 1.47,<br>7.86)   | 24  |
| <b>SNRIs</b>        | Asthenia                             | Gao 2010<br>Gao 2014                                                                 | 2 | 619  | 5%<br>(16/308)   | 0.3%<br>(1/311) | RR 11.16 (95% CI 2.11,<br>59.13) | 21  |
| <b>SNRIs</b>        | Constipation                         | Allen 2014<br>Gao 2010<br>Gao 2014<br>Goldstein 2005<br>Wernicke 2006<br>Yasuda 2011 | 6 | 2156 | 8%<br>(115/1365) | 4%<br>(28/791)  | RR 2.31 (95% CI 1.52,<br>3.52)   | 21  |
| <b>SNRIs</b>        | Diarrhea                             | Gao 2010<br>Wernicke 2006<br>Yasuda 2011                                             | 3 | 887  | 8%<br>(39/503)   | 4%<br>(14/384)  | RR 2.22 (95% CI 1.19,<br>4.13)   | 25  |

|              |                        |                                                                                                        |   |      |                   |                |                                |     |
|--------------|------------------------|--------------------------------------------------------------------------------------------------------|---|------|-------------------|----------------|--------------------------------|-----|
| <b>SNRIs</b> | Dizziness              | Allen 2014<br>Gao 2010<br>Gao 2014<br>Goldstein 2005<br>Wernicke 2006<br>Yasuda 2011                   | 6 | 2156 | 12%<br>(161/1365) | 6%<br>(44/791) | RR 1.93 (95% CI 1.39,<br>2.68) | 17  |
| <b>SNRIs</b> | Increased Sweating     | Gao 2010<br>Goldstein 2005<br>Rowbotham 2005<br>Wernicke 2006                                          | 4 | 1251 | 7%<br>(60/838)    | 2%<br>(10/413) | RR 2.94 (95% CI 1.53,<br>5.63) | 22  |
| <b>SNRIs</b> | Insomnia               | Allen 2014<br>Rowbotham 2005<br>Wernicke 2006                                                          | 3 | 987  | 6%<br>(42/708)    | 2%<br>(6/279)  | RR 2.43 (95% CI 1.14,<br>5.19) | 27  |
| <b>SNRIs</b> | Nausea                 | Allen 2014<br>Gao 2010<br>Gao 2014<br>Goldstein 2005<br>Rowbotham 2005<br>Wernicke 2006<br>Yasuda 2011 | 7 | 2401 | 19%<br>(296/1529) | 5%<br>(47/872) | RR 3.36 (95% CI 2.50,<br>4.52) | 8   |
| <b>SNRIs</b> | Somnolence and Fatigue | Allen 2014<br>Gao 2010<br>Gao 2014<br>Goldstein 2005<br>Rowbotham 2005<br>Wernicke 2006<br>Yasuda 2011 | 7 | 2401 | 18%<br>(272/1529) | 6%<br>(52/872) | RR 3.09 (95% CI 2.31,<br>4.13) | 9   |
| <b>SNRIs</b> | Vomiting               | Allen 2014<br>Gao 2010<br>Rowbotham 2005<br>Yasuda 2011                                                | 4 | 1206 | 6%<br>(42/759)    | 2%<br>(9/447)  | RR 2.30 (95% CI 1.17,<br>4.49) | 29  |
| <b>SNRIs</b> | Decreased Appetite     | Allen 2014<br>Gao 2014<br>Goldstein 2005                                                               | 3 | 1269 | 5%<br>(43/862)    | 2%<br>(10/407) | RR 1.87 (95% CI 0.97,<br>3.60) | NSS |
| <b>SNRIs</b> | Dry Mouth              | Allen 2014<br>Gao 2010<br>Goldstein 2005                                                               | 3 | 1080 | 8%<br>(58/766)    | 4%<br>(12/314) | RR 1.76 (95% CI 0.97,<br>3.17) | NSS |

|              |                           |                                                                                                                       |   |      |                 |                |                                |     |
|--------------|---------------------------|-----------------------------------------------------------------------------------------------------------------------|---|------|-----------------|----------------|--------------------------------|-----|
| <b>SNRIs</b> | Headache                  | Gao 2010<br>Wernicke 2006                                                                                             | 2 | 549  | 10%<br>(33/332) | 6%<br>(13/217) | RR 1.53 (95% CI 0.81,<br>2.91) | NSS |
| <b>SNRIs</b> | Lethargy                  | Allen 2014<br>Gao 2010                                                                                                | 2 | 623  | 5%<br>(21/424)  | 2%<br>(4/199)  | RR 2.33 (95% CI 0.96,<br>5.66) | NSS |
| <b>SNRIs</b> | Nasopharyngitis           | Allen 2014<br>Wernicke 2006<br>Yasuda 2011                                                                            | 3 | 1080 | 8%<br>(55/715)  | 8%<br>(30/365) | RR 1.18 (95% CI 0.76,<br>1.82) | NSS |
| <b>SNRIs</b> | Serious Adverse<br>Events | Allen 2014<br>Gao 2010<br>Gao 2014<br>Goldstein 2005<br>Raskin 2005<br>Rowbotham 2005<br>Wernicke 2006<br>Yasuda 2011 | 8 | 2749 | 3%<br>(50/1761) | 4%<br>(35/988) | RR 0.75 (95% CI 0.50,<br>1.13) | NSS |
| <b>SNRIs</b> | Sustained<br>Hypertension | Goldstein 2005<br>Raskin 2005                                                                                         | 2 | 805  | 5%<br>(26/574)  | 4%<br>(10/231) | RR 1.06 (95% CI 0.51,<br>2.20) | NSS |

CI: Confidence Interval; NNT: Number Needed to Treat; NSS: Not Statistically Significant; RCTs: Randomized Controlled Trials; RR: Risk Ratio; SNRIs: Serotonin–Norepinephrine Reuptake Inhibitors

**Table 13: Statistically Significant Meta-Analyzed Adverse Events Occurring in >10% of Patients Treated with Intervention**

| Intervention Type               | Type of Adverse Event  | Randomized Controlled Trials                                                                                                              | # of RCTs | # of Participants | Intervention Event Rate | Control Event Rate | Risk Ratio (95% Confidence Interval) | NNH |
|---------------------------------|------------------------|-------------------------------------------------------------------------------------------------------------------------------------------|-----------|-------------------|-------------------------|--------------------|--------------------------------------|-----|
| Anticonvulsants (Gabapentin)    | Dizziness              | Backonja 1998<br>Backonja 2011<br>Rauck 2012<br>Rice 2001<br>Rowbotham 1998<br>Sandercock 2012<br>Sang 2013<br>Wallace 2010<br>Zhang 2013 | 9         | 2477              | 19%<br>(300/1566)       | 11%<br>(102/911)   | RR 3.18 (95% CI 2.41, 4.20)          | 13  |
| Anticonvulsants (Gabapentin)    | Somnolence and Fatigue | Backonja 1998<br>Backonja 2011<br>Rauck 2012<br>Rice 2001<br>Rowbotham 1998<br>Sandercock 2012<br>Sang 2013<br>Wallace 2010<br>Zhang 2013 | 9         | 2528              | 13%<br>(211/1566)       | 5%<br>(47/962)     | RR 2.60 (95% CI 1.92, 3.53)          | 12  |
| Anticonvulsants (Oxcarbazepine) | Dizziness              | Beydoun 2006<br>CTRI476G2301<br>Dogra 2005                                                                                                | 3         | 610               | 19%<br>(74/381)         | 3%<br>(8/229)      | RR 5.24 (95% CI 2.54, 10.80)         | 7   |
| Anticonvulsants (Oxcarbazepine) | Headache               | Beydoun 2006<br>CTRI476G2301<br>Dogra 2005                                                                                                | 3         | 610               | 11%<br>(41/381)         | 5%<br>(12/229)     | RR 1.83 (95% CI 1.00, 3.37)          | 19  |
| Anticonvulsants (Oxcarbazepine) | Nausea                 | Beydoun 2006<br>CTRI476G2301<br>Dogra 2005                                                                                                | 3         | 610               | 13%<br>(49/381)         | 3%<br>(7/229)      | RR 3.62 (95% CI 1.73, 7.59)          | 11  |
| Anticonvulsants (Oxcarbazepine) | Somnolence or Fatigue  | Beydoun 2006<br>CTRI476G2301<br>Dogra 2005                                                                                                | 3         | 610               | 15%<br>(57/381)         | 5%<br>(11/229)     | RR 2.41 (95% CI 1.33, 4.34)          | 10  |
| Anticonvulsants (Pregabalin)    | Dizziness              | Arezzo 2008<br>Baba 2020<br>Dworkin 2003<br>Freyenhagen 2005<br>Guan 2011                                                                 | 22        | 5696              | 20%<br>(687/3503)       | 6%<br>(122/2193)   | RR 3.25 (95% CI 2.69, 3.92)          | 8   |

|                                 |                           |                                                                                                                                                                                                                                                                                                                                   |    |      |                   |                 |                                |    |
|---------------------------------|---------------------------|-----------------------------------------------------------------------------------------------------------------------------------------------------------------------------------------------------------------------------------------------------------------------------------------------------------------------------------|----|------|-------------------|-----------------|--------------------------------|----|
|                                 |                           | Huffman 2015<br>Lesser 2004<br>Liu 2017<br>McDonnell 2018<br>Mu 2018<br>NCT00394901 2006<br>NCT02215252 2014<br>Rauck 2012<br>Richter 2005<br>Rosenstock 2004<br>Sabatowski 2004<br>Satoh 2011<br>Smith 2014<br>Stacey 2008<br>Tolle 2008<br>Van-Seventer 2006<br>Vinik 2014                                                      |    |      |                   |                 |                                |    |
| Anticonvulsants<br>(Pregabalin) | Somnolence and<br>Fatigue | Arezzo 2008<br>Baba 2020<br>Dworkin 2003<br>Freyhagen 2005<br>Guan 2011<br>Huffman 2015<br>Lesser 2004<br>Liu 2017<br>Mu 2018<br>NCT00394901 2006<br>Rauck 2012<br>Richter 2005<br>Rosenstock 2004<br>Sabatowski 2004<br>Satoh 2011<br>Smith 2014<br>Stacey 2008<br>Tolle 2008<br>Van-Seventer 2006<br>Vinik 2014<br>Ziegler 2015 | 21 | 5646 | 15%<br>(507/3481) | 4%<br>(90/2165) | RR 3.38 (95% CI 2.71,<br>4.21) | 10 |
| Opioids                         | Constipation              | Freeman 2007<br>Hanna 2008                                                                                                                                                                                                                                                                                                        | 5  | 963  | 24%<br>(122/500)  | 7%<br>(31/463)  | RR 3.72 (95% CI 2.58,<br>5.35) | 6  |

|              |                                                           |                                                                                                               |   |      |                  |                  |                                |    |
|--------------|-----------------------------------------------------------|---------------------------------------------------------------------------------------------------------------|---|------|------------------|------------------|--------------------------------|----|
|              |                                                           | Jensen 2006<br>NCT01124617 2010<br>Zin 2010                                                                   |   |      |                  |                  |                                |    |
| Opioids      | Dizziness                                                 | Freeman 2007<br>Hanna 2008<br>Jensen 2006<br>NCT01124617 2010<br>Zin 2010                                     | 5 | 963  | 18%<br>(88/500)  | 8%<br>(35/463)   | RR 2.49 (95% CI 1.78,<br>3.50) | 10 |
| Opioids      | Nausea                                                    | Freeman 2007<br>Hanna 2008<br>Jensen 2006<br>NCT01124617 2010<br>Zin 2010                                     | 5 | 963  | 25%<br>(124/500) | 8%<br>(37/463)   | RR 3.15 (95% CI 2.23,<br>4.45) | 6  |
| Opioids      | Pruritus                                                  | Jensen 2006<br>NCT01124617 2010<br>Zin 2010                                                                   | 3 | 312  | 16%<br>(27/171)  | 4%<br>(6/141)    | RR 3.68 (95% CI 1.68,<br>8.06) | 9  |
| Opioids      | Somnolence and<br>Fatigue                                 | Freeman 2007<br>Hanna 2008<br>Jensen 2006<br>NCT01124617 2010<br>Zin 2010                                     | 5 | 963  | 27%<br>(137/500) | 8%<br>(36/463)   | RR 3.54 (95% CI 2.52,<br>4.97) | 6  |
| Opioids      | Vomiting                                                  | Hanna 2008<br>Jensen 2006<br>NCT01124617 2010<br>Zin 2010                                                     | 4 | 650  | 14%<br>(48/340)  | 4%<br>(12/310)   | RR 3.58 (95% CI 1.90,<br>6.72) | 11 |
| Rubefacients | Application Site<br>Pain                                  | Backonja 2008<br>Capsaicin Study Group<br>1992<br>Irving 2011<br>Simpson 2017<br>Webster 2010                 | 5 | 1619 | 35%<br>(292/843) | 15%<br>(117/776) | RR 2.38 (95% CI 1.99,<br>2.84) | 6  |
| Rubefacients | Local Reaction<br>(Burning, Stinging,<br>and/or Erythema) | Backonja 2008<br>Bernstein 1989<br>Capsaicin Study Group<br>1992<br>Irving 2011<br>Tandan 1992<br>Watson 1993 | 7 | 1447 | 72%<br>(547/758) | 47%<br>(323/689) | RR 1.63 (95% CI 1.50,<br>1.76) | 4  |

|              |                                       |                                                                                                        |   |      |                   |                |                             |    |
|--------------|---------------------------------------|--------------------------------------------------------------------------------------------------------|---|------|-------------------|----------------|-----------------------------|----|
|              |                                       | Webster 2010                                                                                           |   |      |                   |                |                             |    |
| Rubefacients | Unspecified Application Site Reaction | Simpson 2017<br>Watson 1993                                                                            | 2 | 512  | 29%<br>(76/260)   | 6%<br>(16/252) | RR 4.64 (95% CI 2.79, 7.72) | 5  |
| SNRIs        | Dizziness                             | Allen 2014<br>Gao 2010<br>Gao 2014<br>Goldstein 2005<br>Wernicke 2006<br>Yasuda 2011                   | 6 | 2156 | 12%<br>(161/1365) | 6%<br>(44/791) | RR 1.93 (95% CI 1.39, 2.68) | 17 |
| SNRIs        | Nausea                                | Allen 2014<br>Gao 2010<br>Gao 2014<br>Goldstein 2005<br>Rowbotham 2005<br>Wernicke 2006<br>Yasuda 2011 | 7 | 2401 | 19%<br>(296/1529) | 5%<br>(47/872) | RR 3.36 (95% CI 2.50, 4.52) | 8  |
| SNRIs        | Somnolence and Fatigue                | Allen 2014<br>Gao 2010<br>Gao 2014<br>Goldstein 2005<br>Rowbotham 2005<br>Wernicke 2006<br>Yasuda 2011 | 7 | 2401 | 18%<br>(272/1529) | 6%<br>(52/872) | RR 3.09 (95% CI 2.31, 4.13) | 9  |



**Table 14: Withdrawals Due to Adverse Events**

| Intervention Type                      | Number of RCTs | Intervention Event Rate | Control Event Rate | Risk Ratio (95% CI)          | NNH |
|----------------------------------------|----------------|-------------------------|--------------------|------------------------------|-----|
| <b>Acupuncture</b>                     | 1              | 7%<br>(2/28)            | 3%<br>(1/31)       | RR 2.21 (95% CI 0.21, 23.11) | NSS |
| <b>Anticonvulsants (Gabapentin)</b>    | 8              | 13%<br>(184/1470)       | 8%<br>(72/911)     | RR 1.47 (95% CI 1.13, 1.91)  | 22  |
| <b>Anticonvulsants (Oxcarbazepine)</b> | 3              | 26%<br>(102/395)        | 7%<br>(16/234)     | RR 3.82 (95% CI 2.28, 6.39)  | 6   |
| <b>Anticonvulsants (Pregabalin)</b>    | 24             | 11%<br>(399/3701)       | 5%<br>(105/2240)   | RR 2.15 (95% CI 1.74, 2.65)  | 17  |
| <b>Anticonvulsants (Topiramate)</b>    | 1              | 24%<br>(52/214)         | 8.3%<br>(9/109)    | RR 2.94 (95% CI 1.51, 5.75)  | 7   |
| <b>Opioids</b>                         | 6              | 14%<br>(84/593)         | 6%<br>(31/556)     | RR 2.55 (95% CI 1.73, 3.76)  | 12  |
| <b>SNRIs</b>                           | 7              | 13%<br>(207/1655)       | 5%<br>(42/879)     | RR 2.48 (95% CI 1.78, 3.45)  | 13  |
| <b>Rubefacients</b>                    | 3              | 6%<br>(36/599)          | 2%<br>(8/428)      | RR 3.31 (95% CI 1.56, 7.01)  | 25  |

CI: Confidence Interval; NNT: Number Needed to Treat; NSS: Not Statistically Significant; RCTs: Randomized Controlled Trials; RR: Risk Ratio; SNRIs: Serotonin-Norepinephrine Reuptake Inhibitors

## Data Analysis of Adverse Events

### Acupuncture

Figure 11.1 Acupuncture versus control; Withdrawals due to Adverse Events

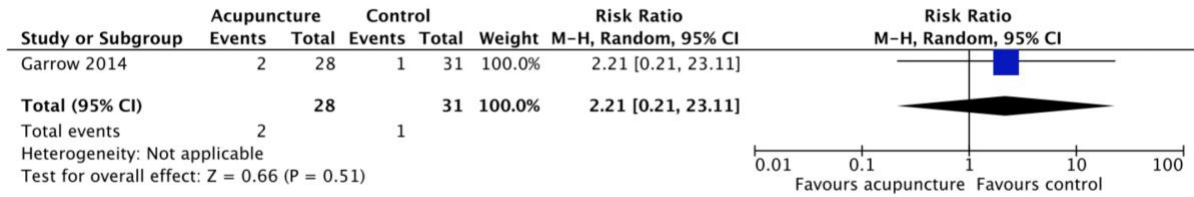

## Anticonvulsants (Gabapentin)

Figure 12.1 Gabapentin versus control; Withdrawals due to Adverse Events

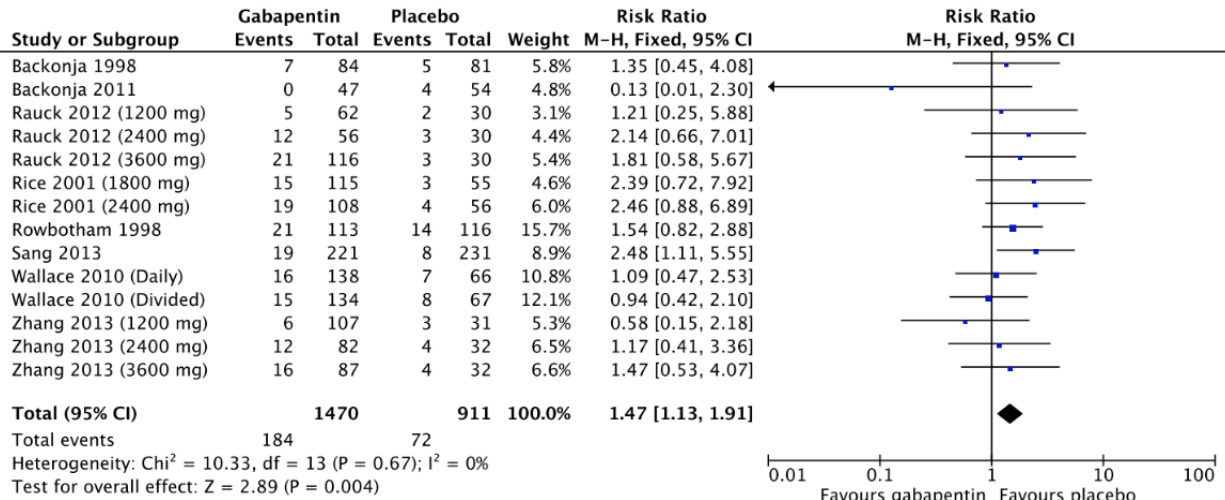

Figure 12.2 Gabapentin versus control; Adverse Event: Arthralgia

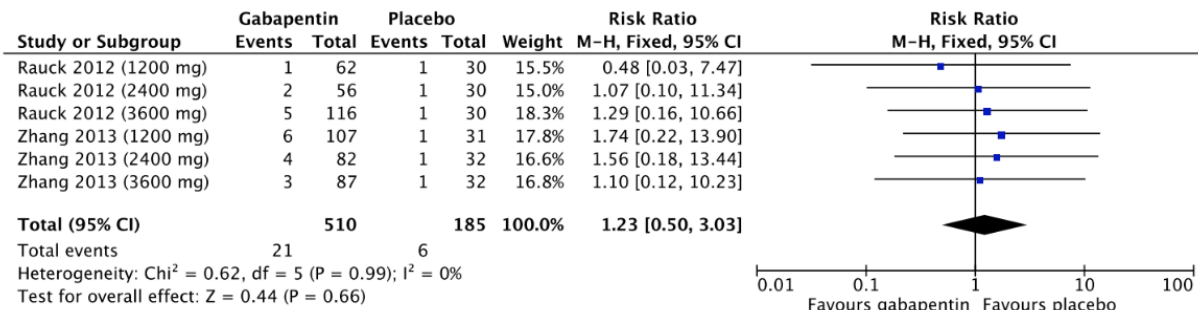

Figure 12.3 Gabapentin versus control; Adverse Event: Back Pain

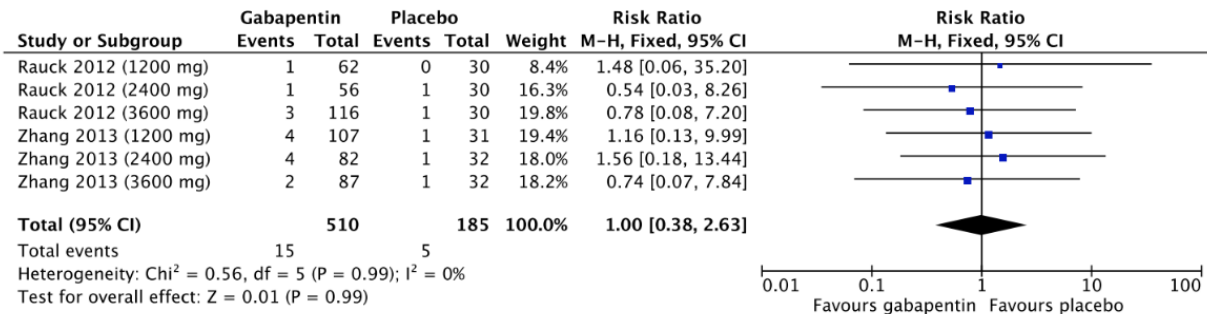

Figure 12.4 Gabapentin versus control; Adverse Event: Blurred Vision

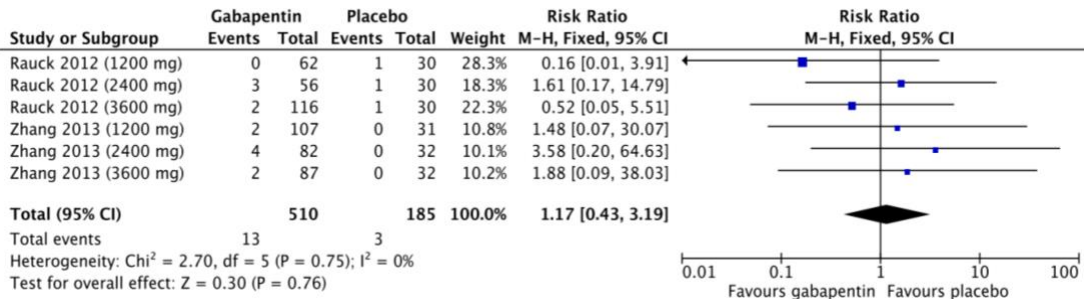

Figure 12.5 Gabapentin versus control; Adverse Event: Constipation

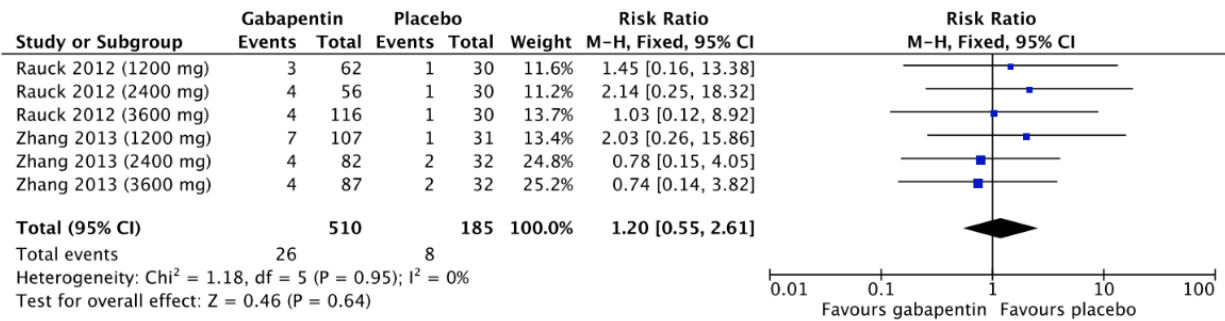

Figure 12.6 Gabapentin versus control; Adverse Event: Diarrhea

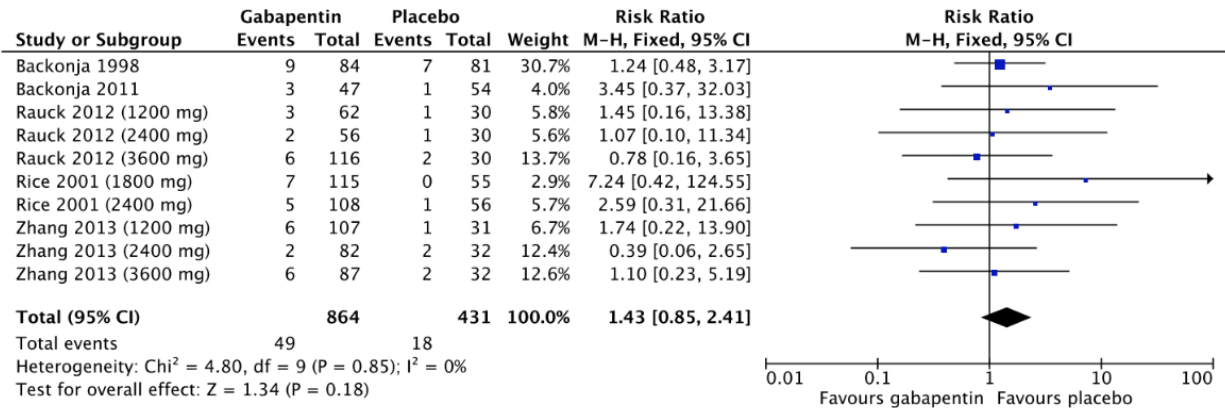

Figure 12.7 Gabapentin versus control; Adverse Event: Dizziness

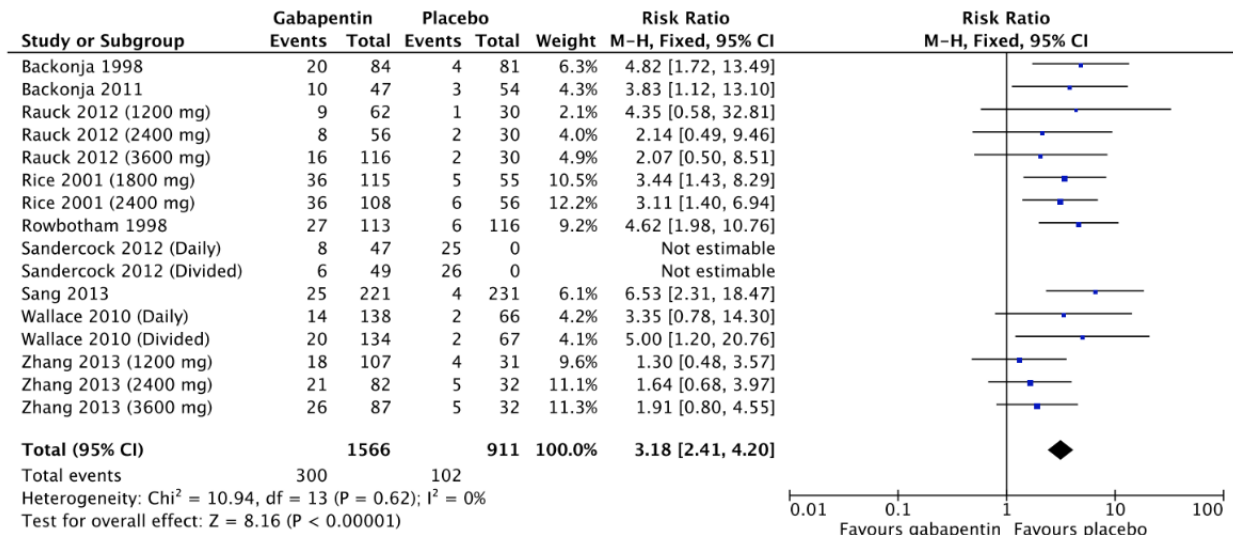

Figure 12.8 Gabapentin versus control; Adverse Event: Dry Mouth

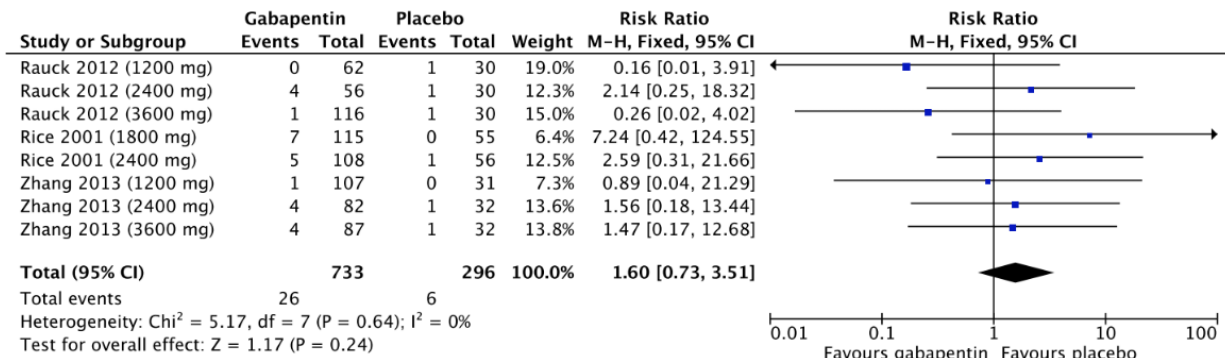

Figure 12.9 Gabapentin versus control; Adverse Event: Headache

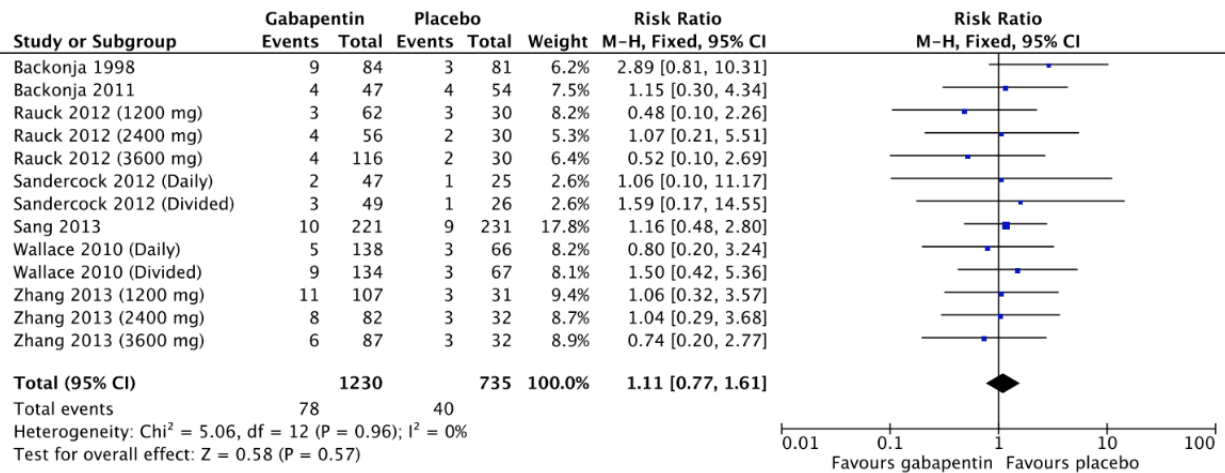

Figure 12.10 Gabapentin versus control; Adverse Event: Increased Weight

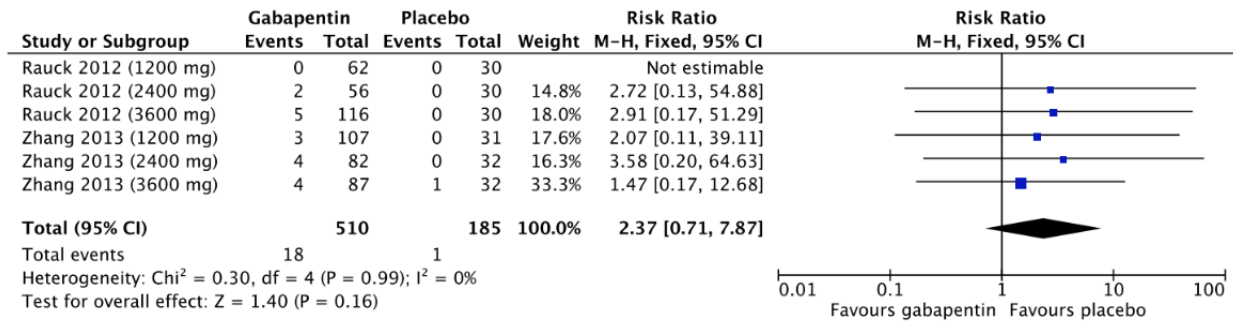

Figure 12.11 Gabapentin versus control; Adverse Event: Insomnia

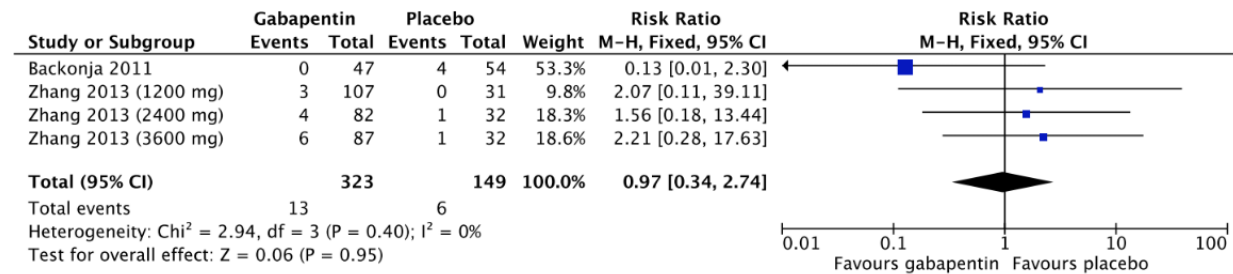

Figure 12.12 Gabapentin versus control; Adverse Event: Nasopharyngitis

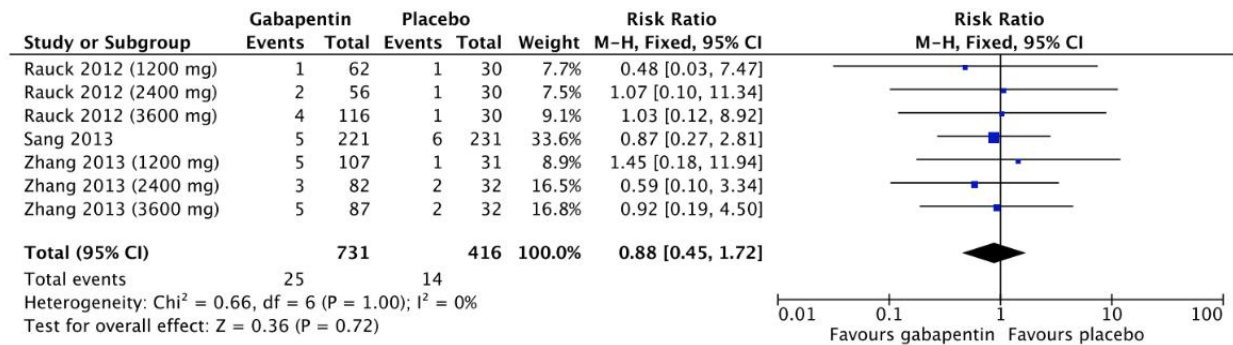

Figure 12.13 Gabapentin versus control; Adverse Event: Nausea

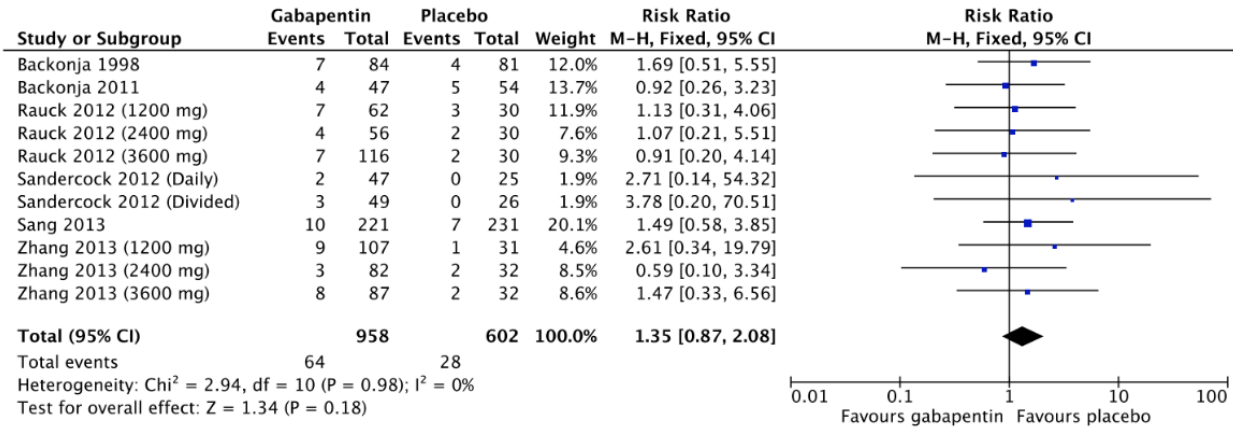

Figure 12.14 Gabapentin versus control; Adverse Event: Peripheral Edema

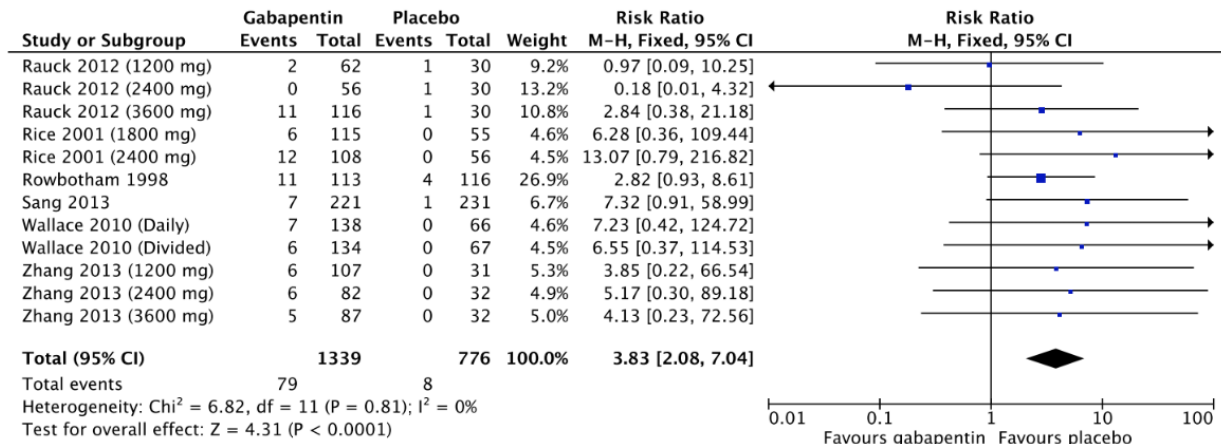

Figure 12.15 Gabapentin versus control; Adverse Event: Serious Adverse Events

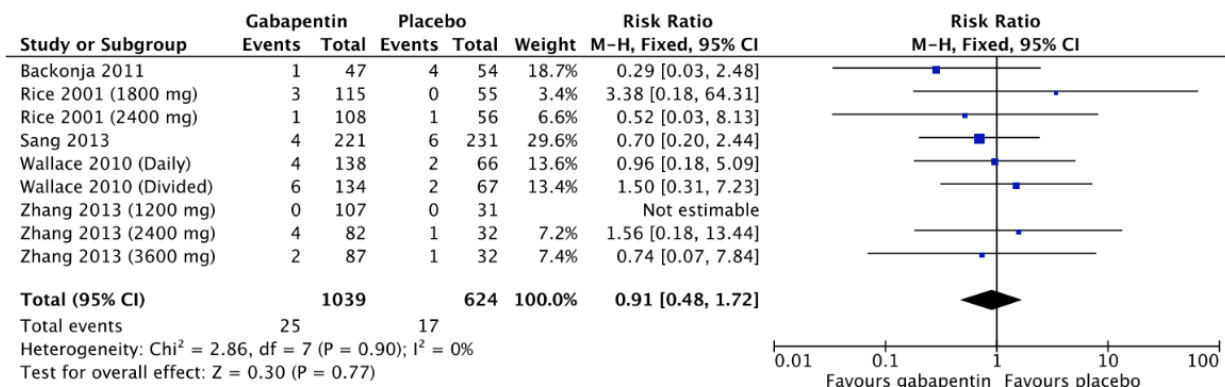

Figure 12.16 Gabapentin versus control; Adverse Event: Somnolence and Fatigue

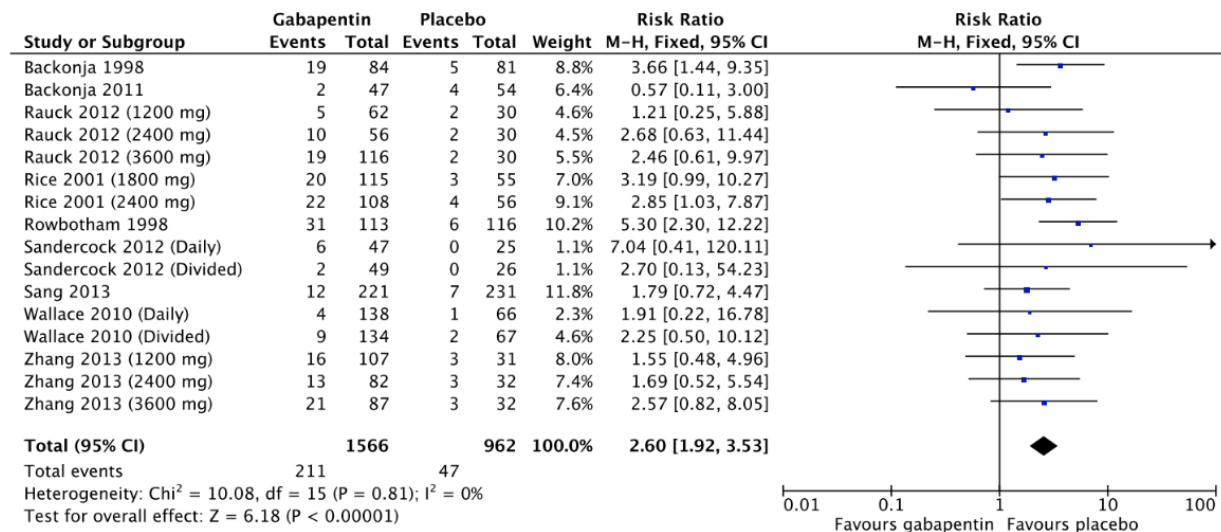

Figure 12.17 Gabapentin versus control; Adverse Event: Urinary Tract Infection

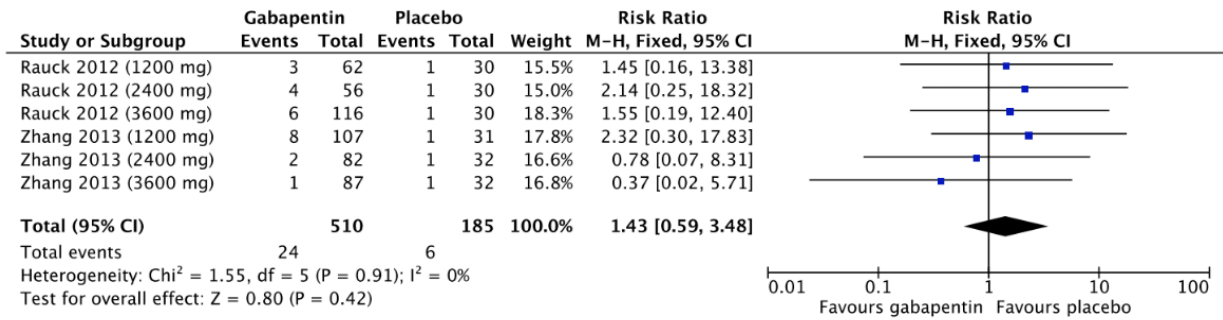



## Anticonvulsants (Oxcarbazepine)

Figure 13.1 Oxcarbazepine versus control; Withdrawals due to Adverse Events

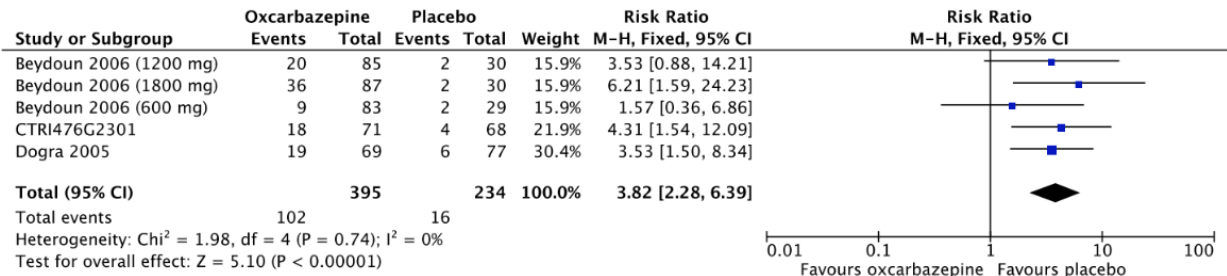

Figure 13.2 Oxcarbazepine versus control; Adverse Event: Back Pain

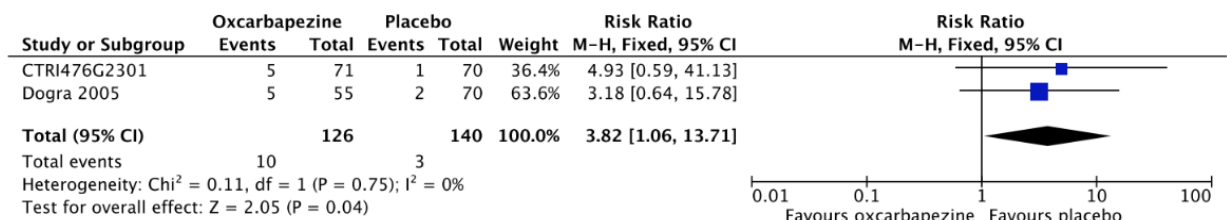

Figure 13.3 Oxcarbazepine versus control; Adverse Event: Diarrhea

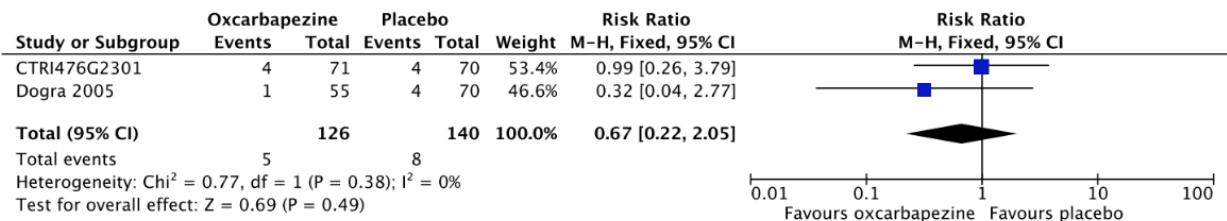

Figure 13.4 Oxcarbazepine versus control; Adverse Event: Dizziness

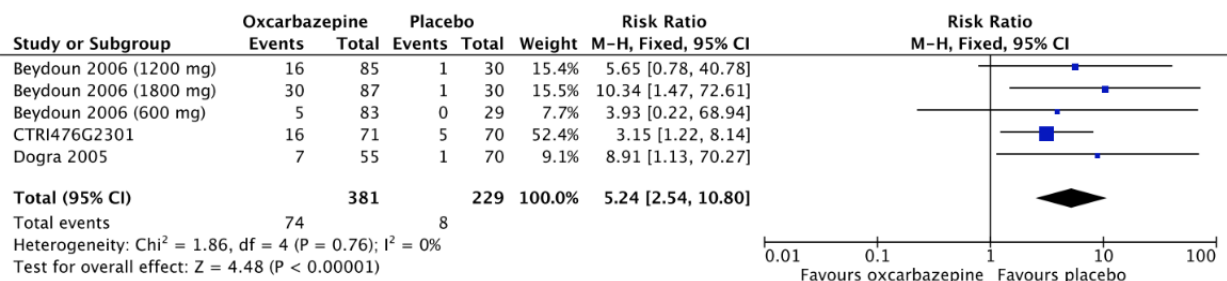

Figure 13.5 Oxcarbazepine versus control; Adverse Event: Headache

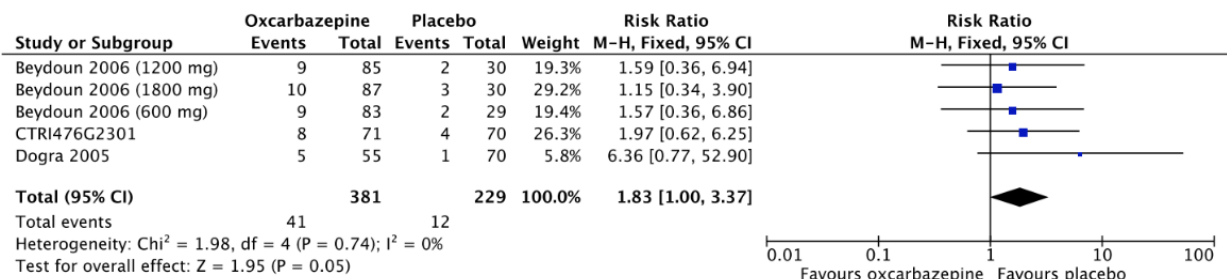

Figure 13.6 Oxcarbazepine versus control; Adverse Event: Nausea

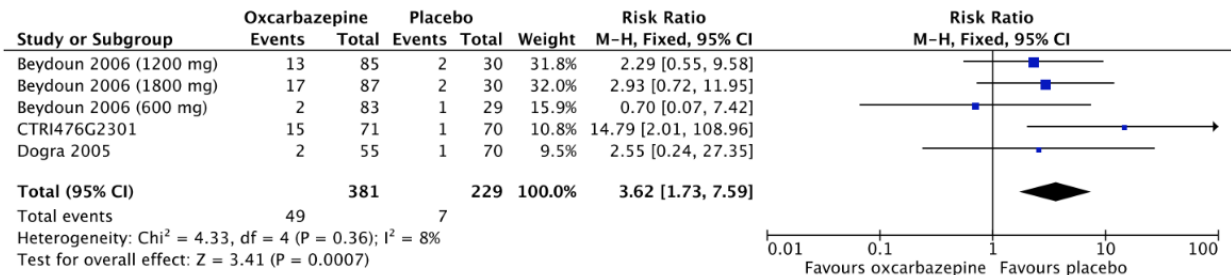

Figure 13.7 Oxcarbazepine versus control; Adverse Event: Serious Adverse Events

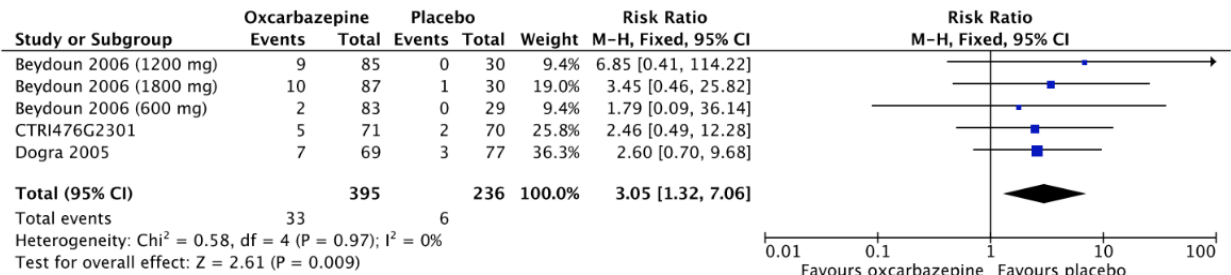

Figure 13.8 Oxcarbazepine versus control; Adverse Event: Somnolence and Fatigue

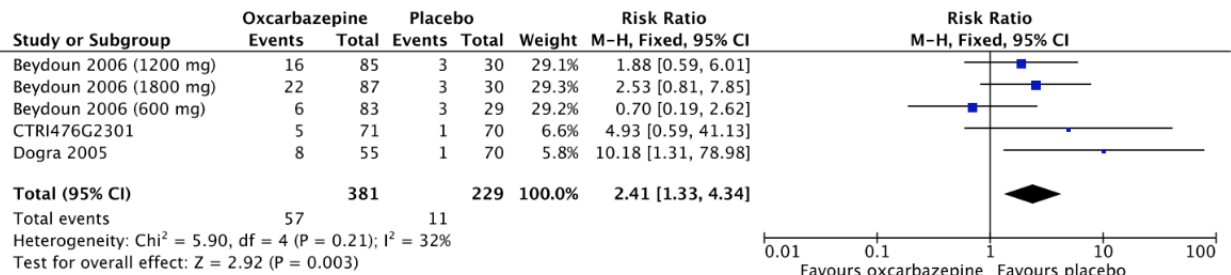

Figure 13.9 Oxcarbazepine versus control; Adverse Event: Tremor

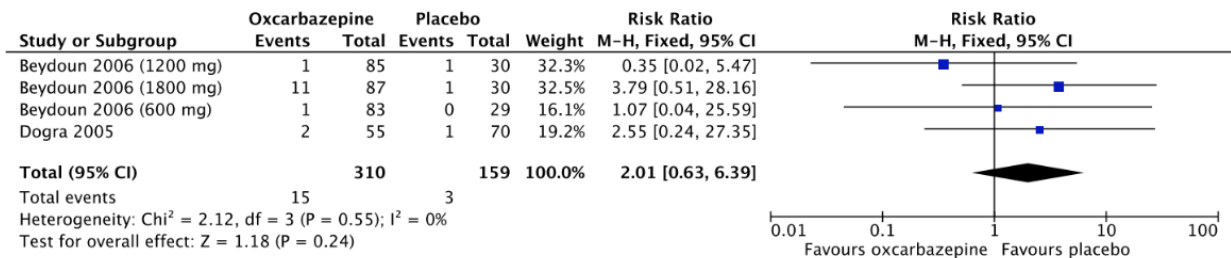

## Anticonvulsants (Pregabalin)

Figure 14.1 Pregabalin versus control; Withdrawals due to Adverse Events

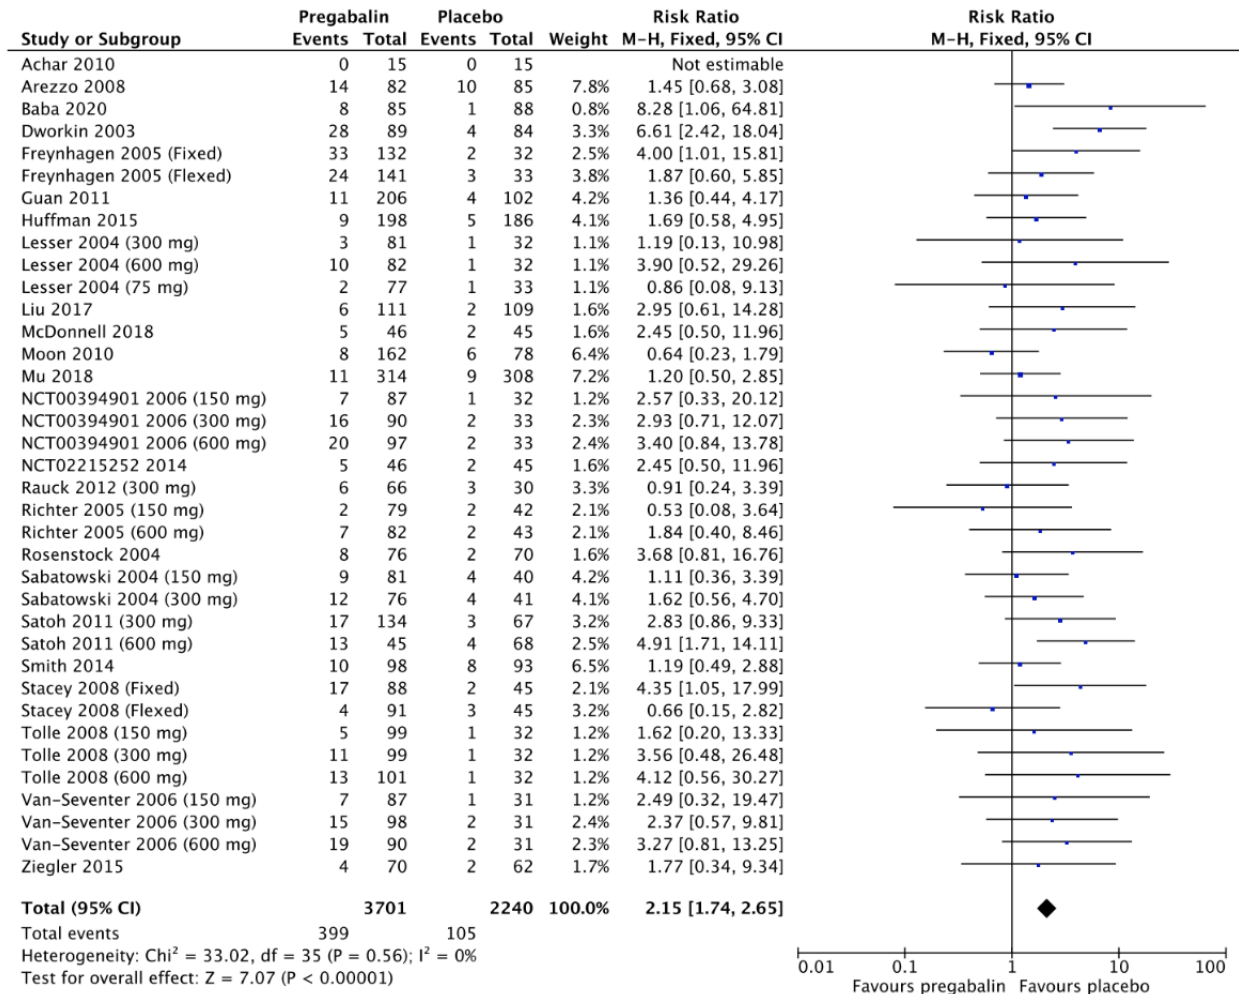

Figure 14.2 Pregabalin versus control; Adverse Event: Abnormal Coordination

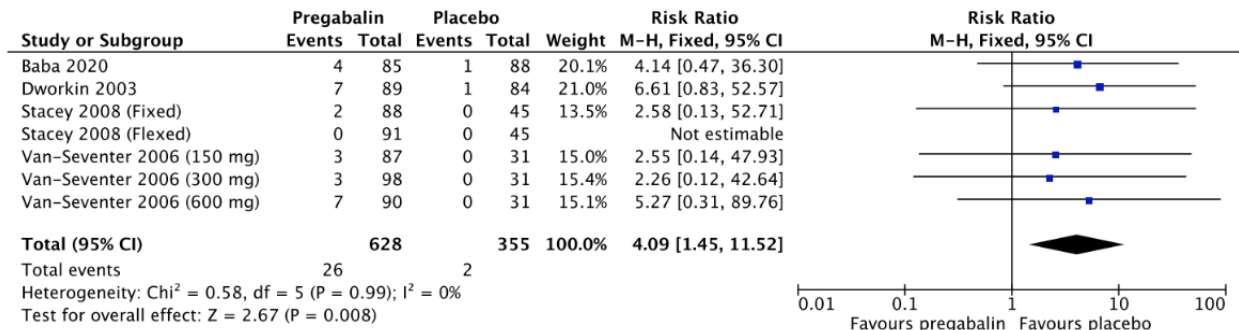

Figure 14.3 Pregabalin versus control; Adverse Event: Abnormal Thinking

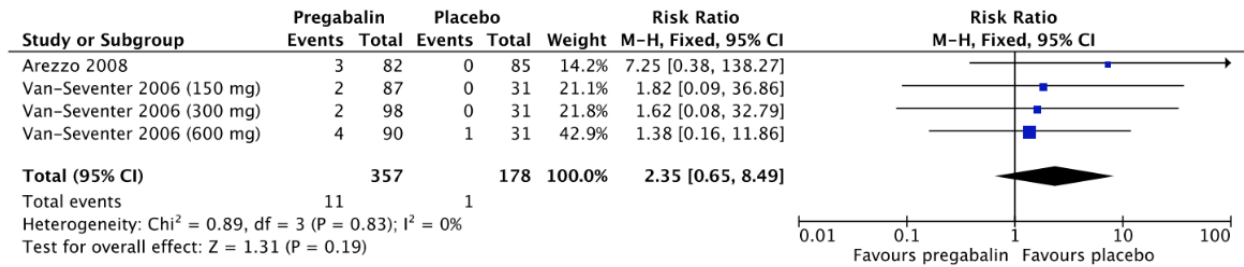

Figure 14.4 Pregabalin versus control; Adverse Event: Amblyopia

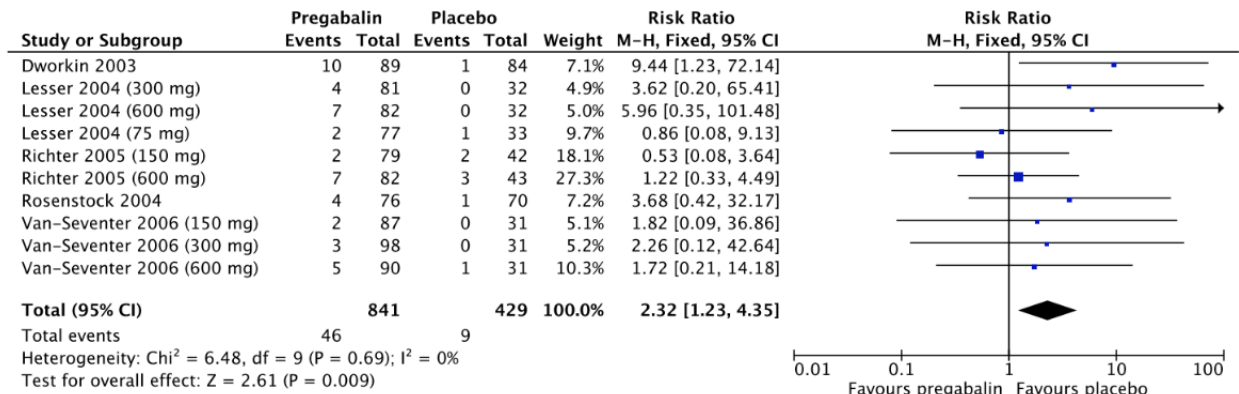

Figure 14.5 Pregabalin versus control; Adverse Event: Amnesia

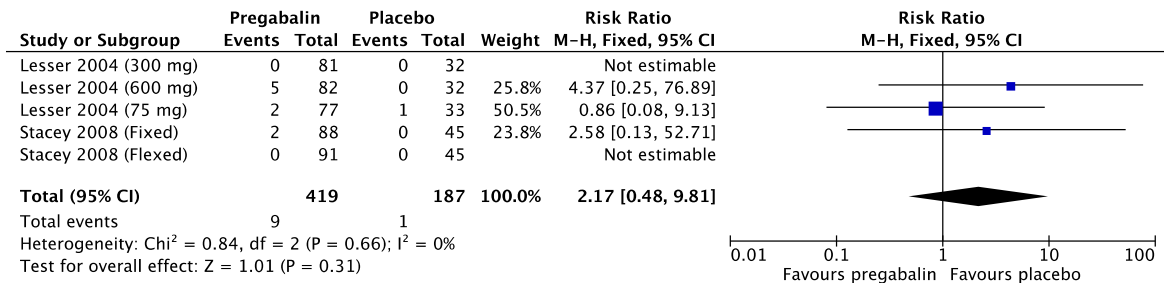

Figure 14.6 Pregabalin versus control; Adverse Event: Asthenia

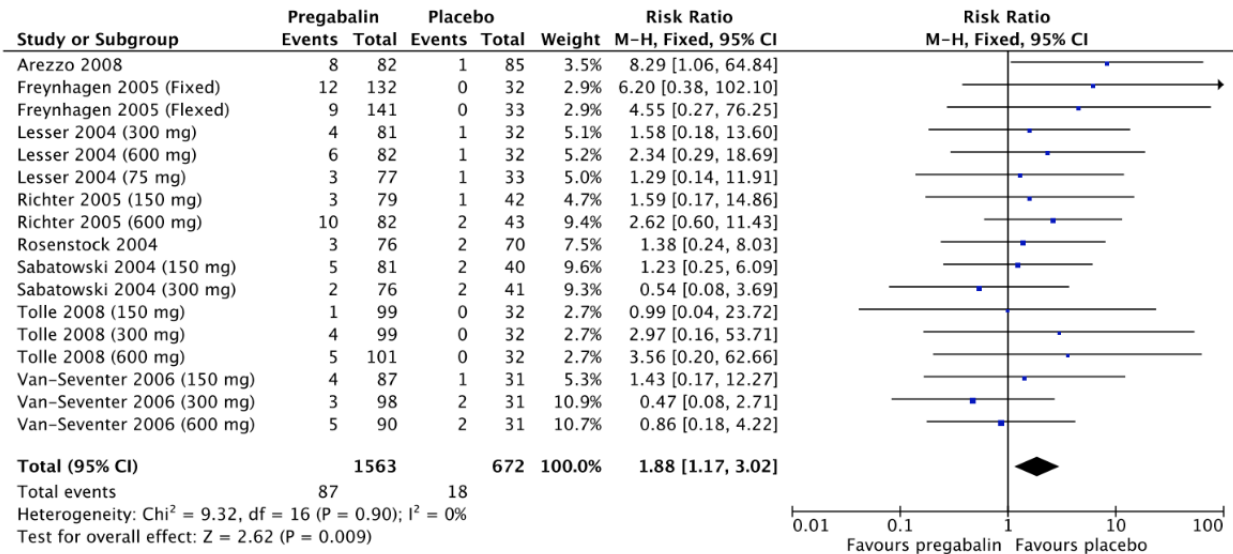

Figure 14.7 Pregabalin versus control; Adverse Event: Ataxia

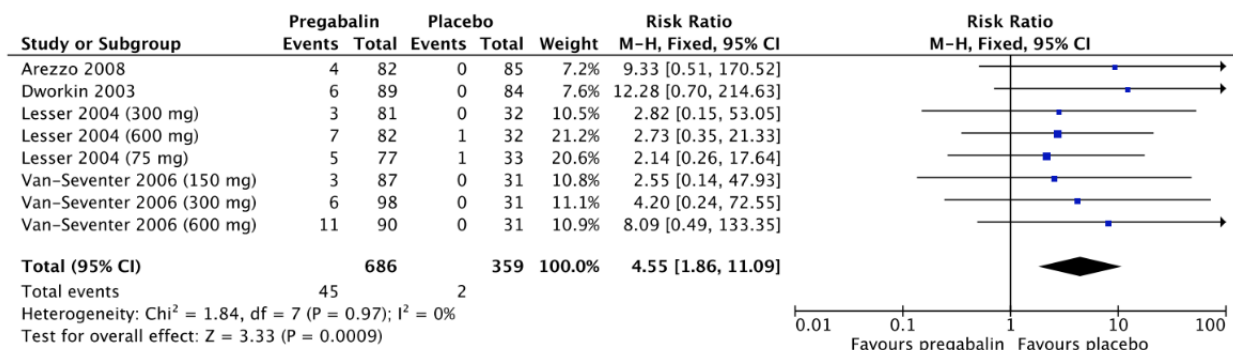

Figure 14.8 Pregabalin versus control; Adverse Event: Back Pain

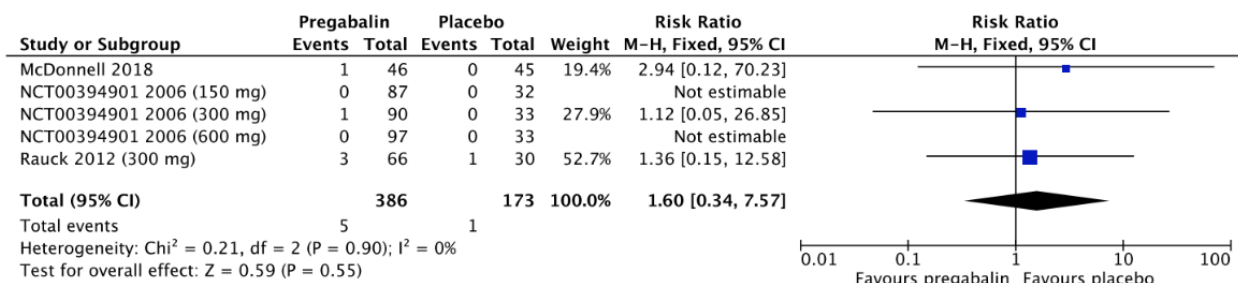

Figure 14.9 Pregabalin versus control; Adverse Event: Balance Disorder

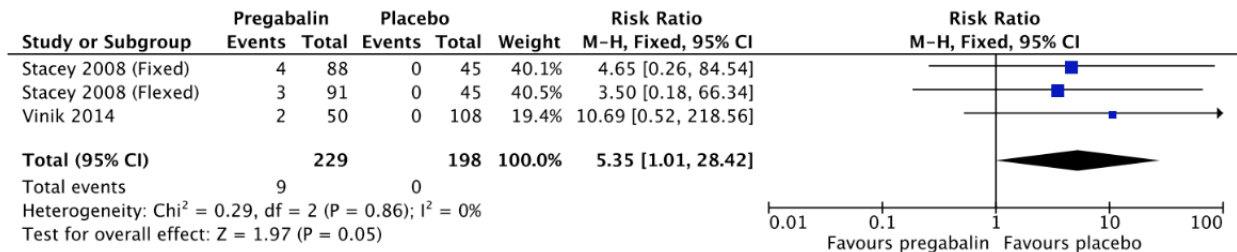

Figure 14.10 Pregabalin versus control; Adverse Event: Confusion

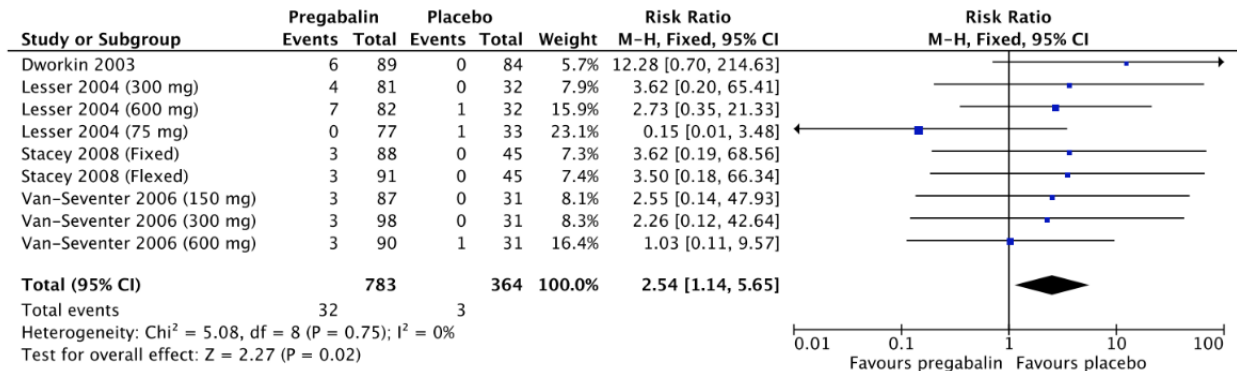

Figure 14.11 Pregabalin versus control; Adverse Event: Constipation

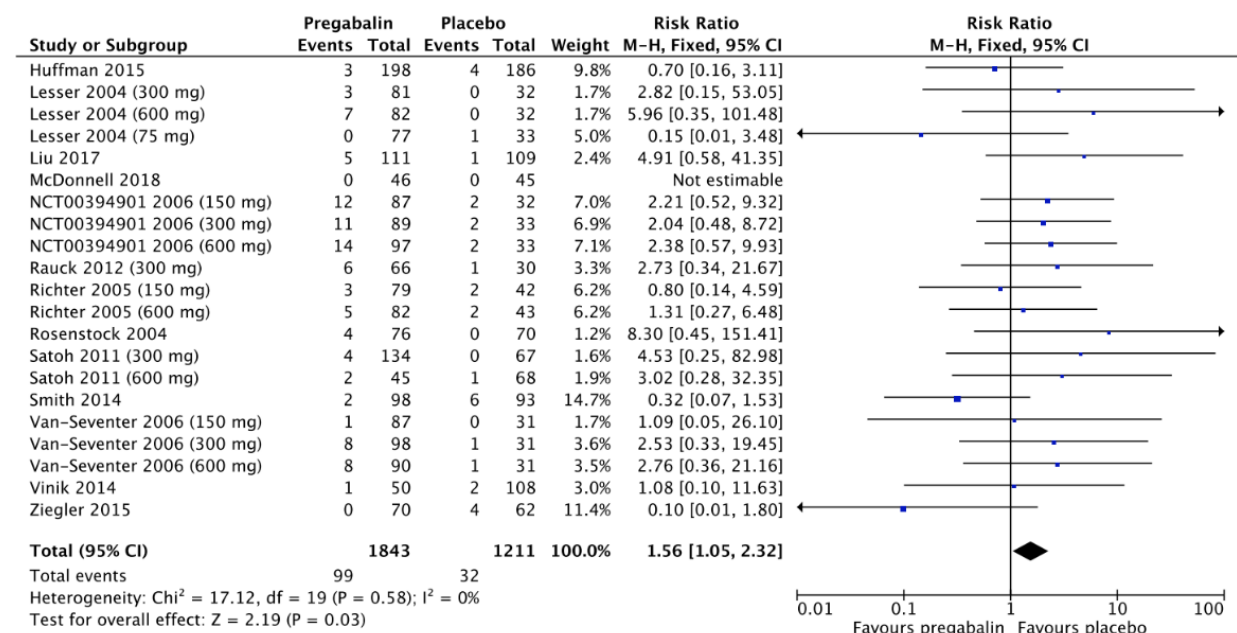

Figure 14.12 Pregabalin versus control; Adverse Event: Contusion

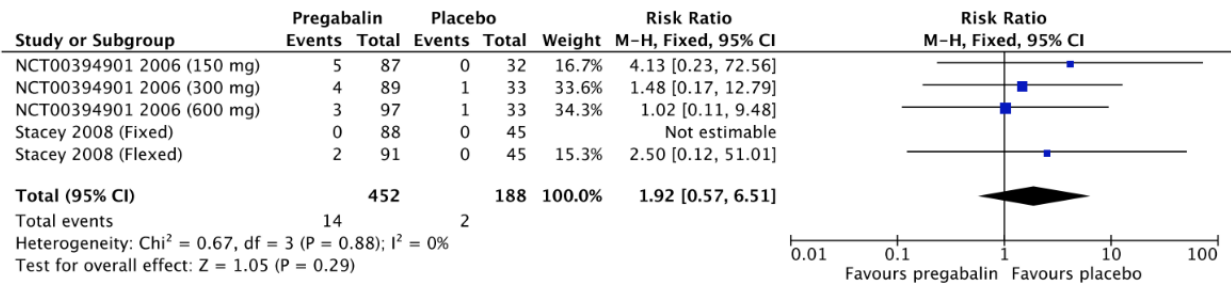

Figure 14.13 Pregabalin versus control; Adverse Event: Diarrhea

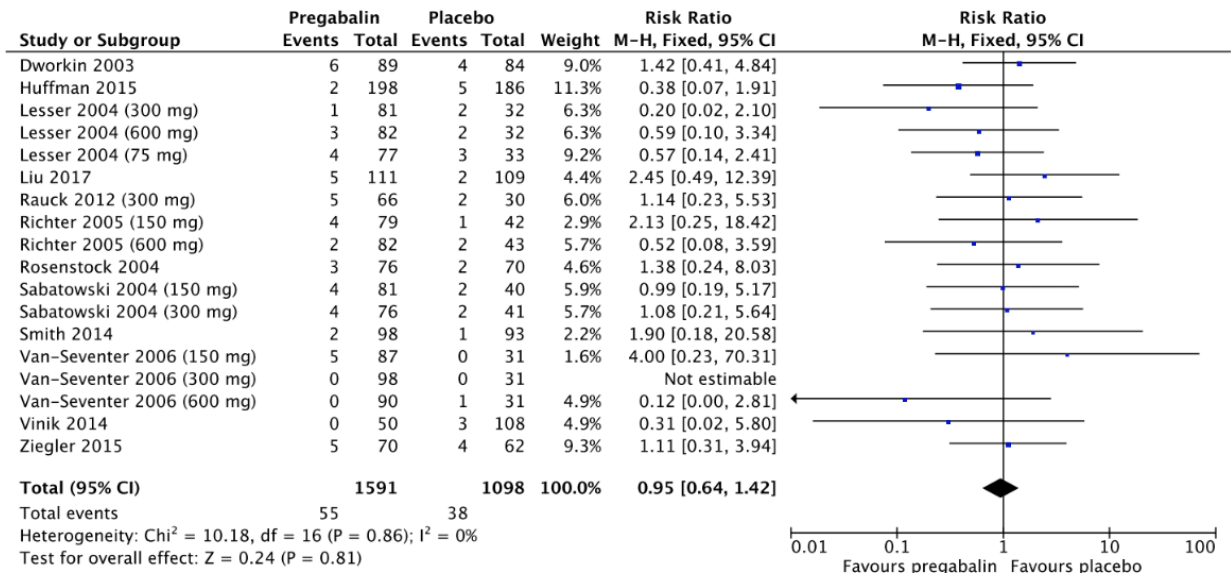

Figure 14.14 Pregabalin versus control; Adverse Event: Diplopia

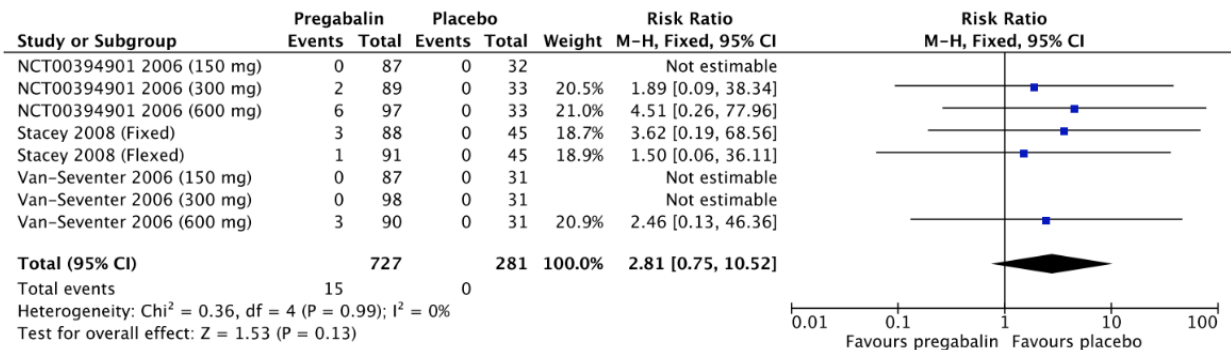

Figure 14.15 Pregabalin versus control; Adverse Event: Disturbance in Attention

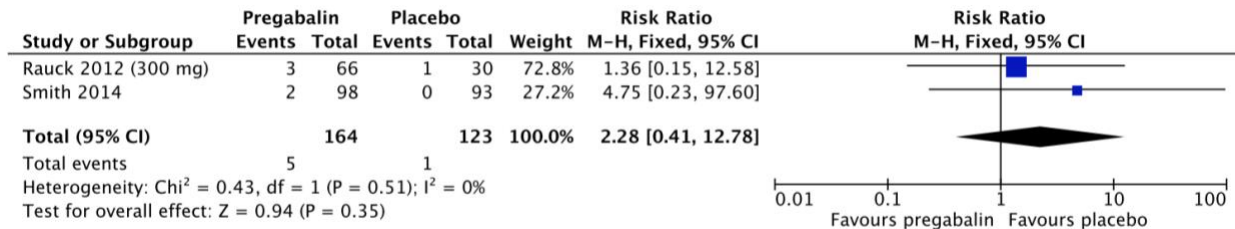

Figure 14.16 Pregabalin versus control; Adverse Event: Dizziness

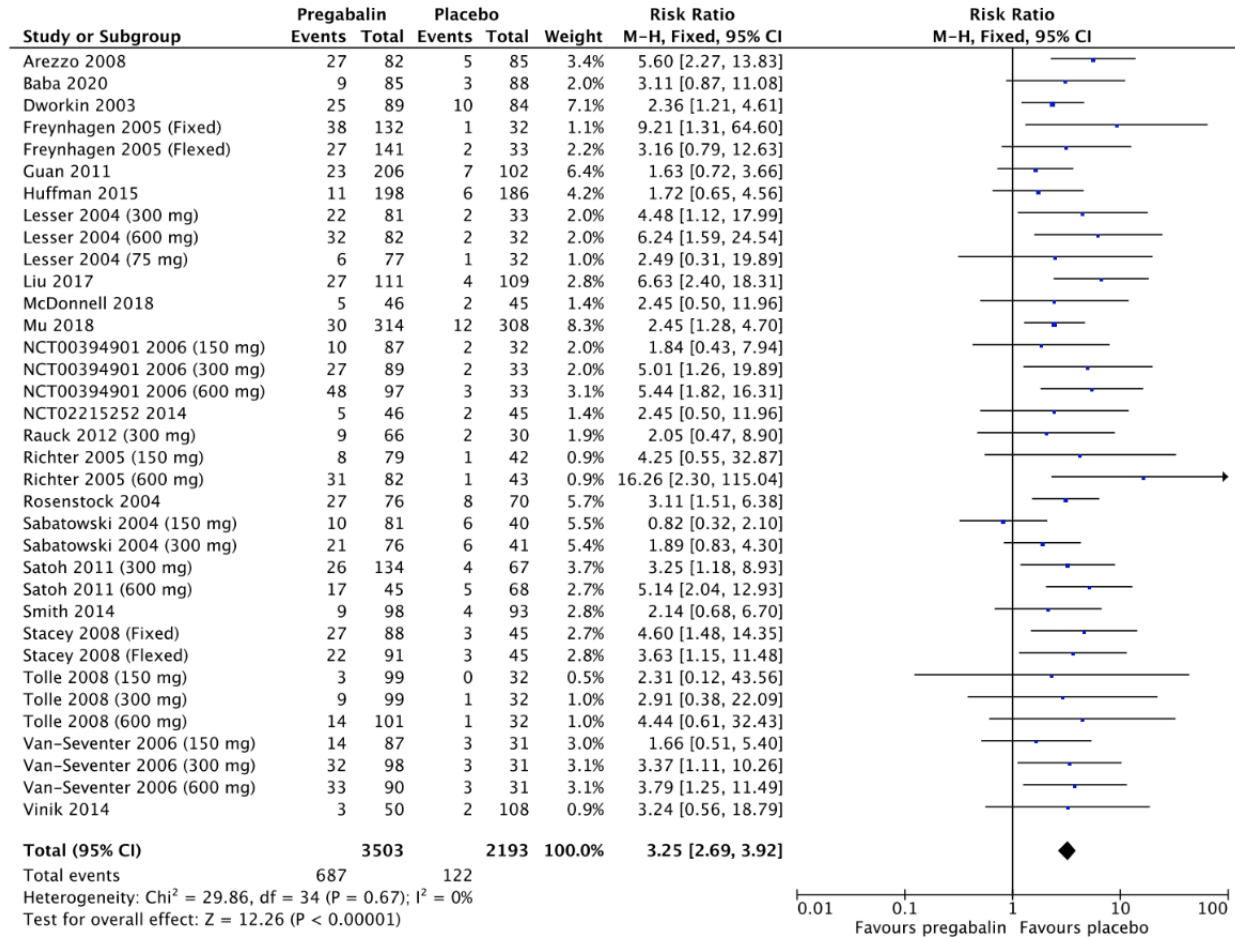



Figure 14.17 Pregabalin versus control; Adverse Event: Dry Mouth

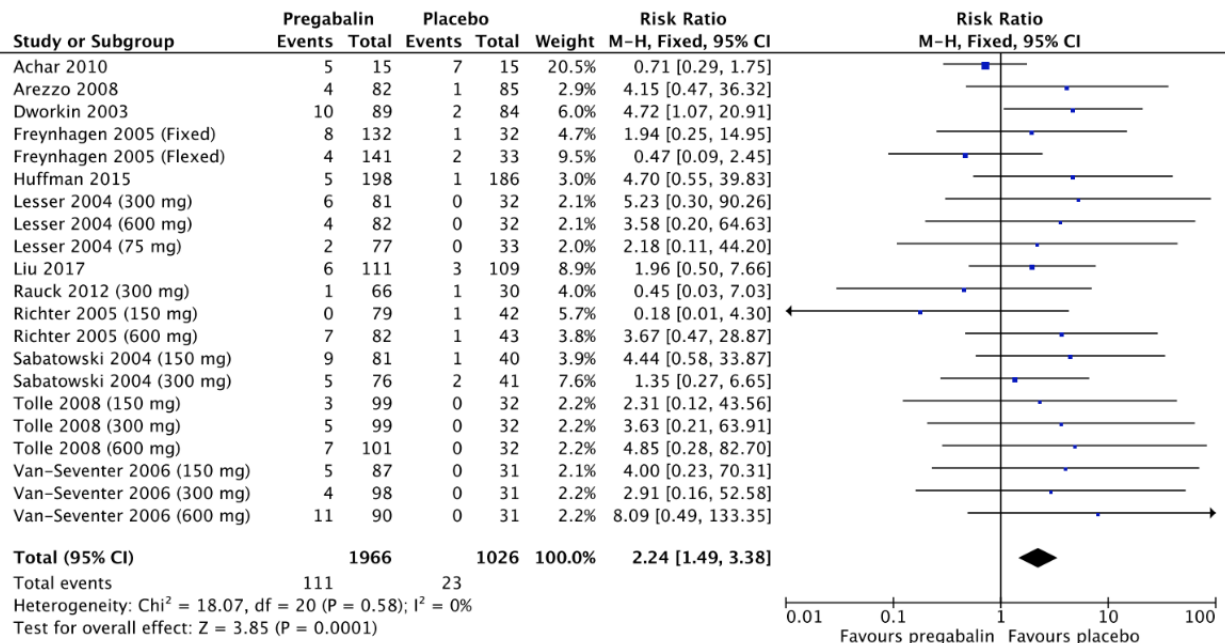

Figure 14.18 Pregabalin versus control; Adverse Event: Euphoria

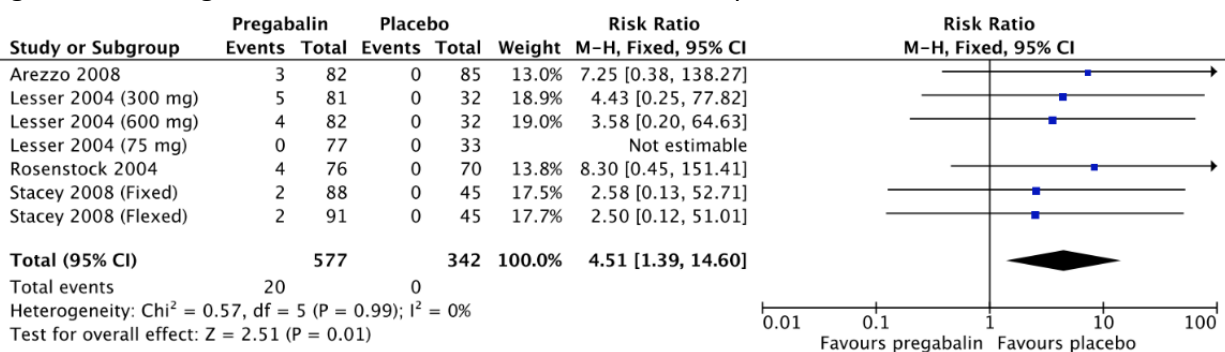

Figure 14.19 Pregabalin versus control; Adverse Event: Facial Edema

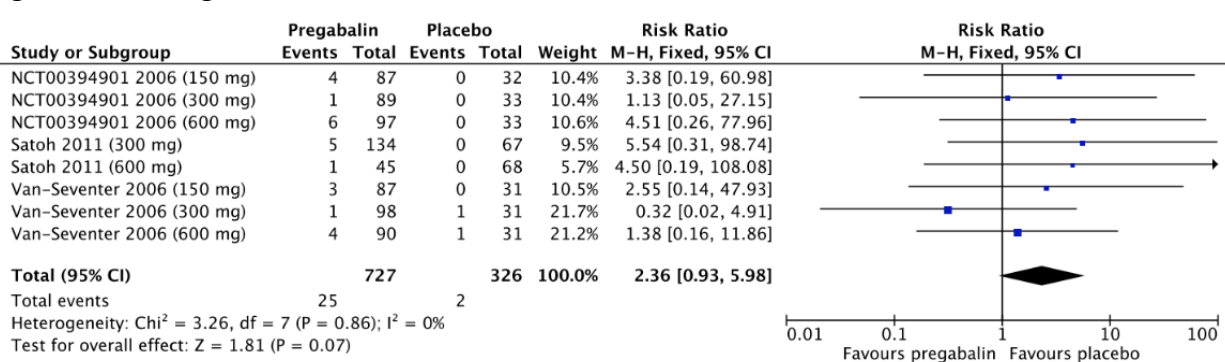

Figure 14.20 Pregabalin versus control; Adverse Event: Falls

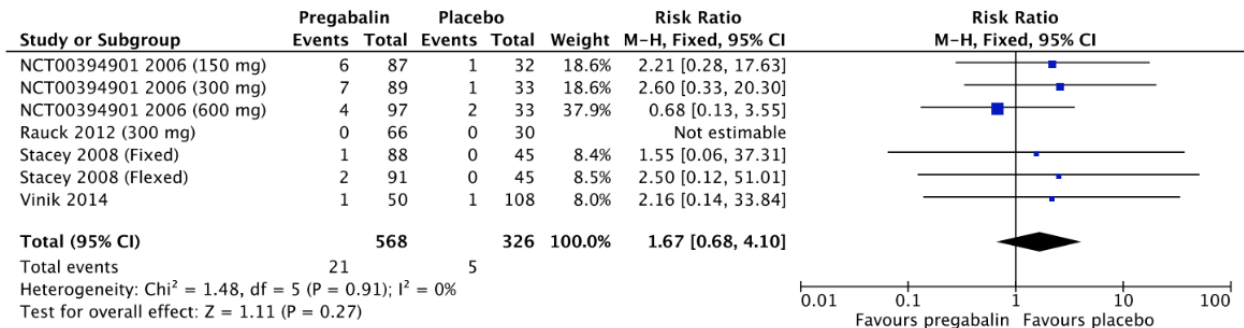

Figure 14.21 Pregabalin versus control; Adverse Event: Flatulence

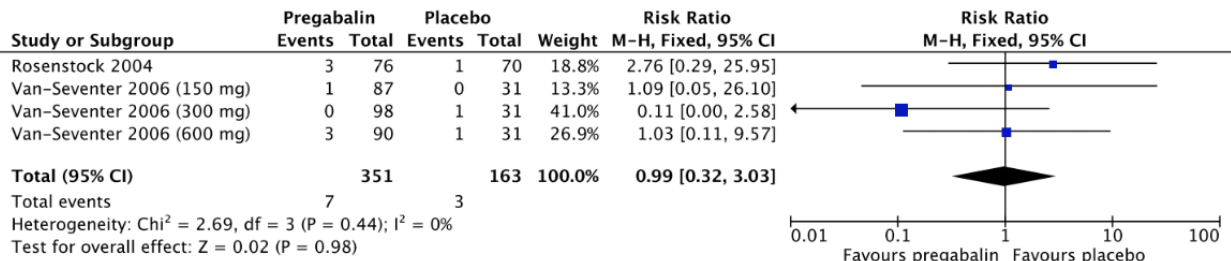

Figure 14.22 Pregabalin versus control; Adverse Event: Generalized Edema

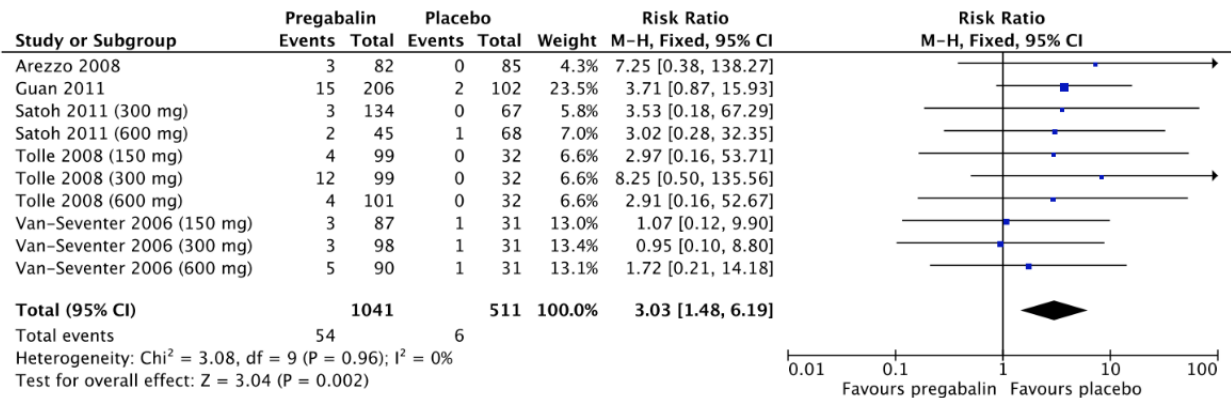

Figure 14.23 Pregabalin versus control; Adverse Event: Headache

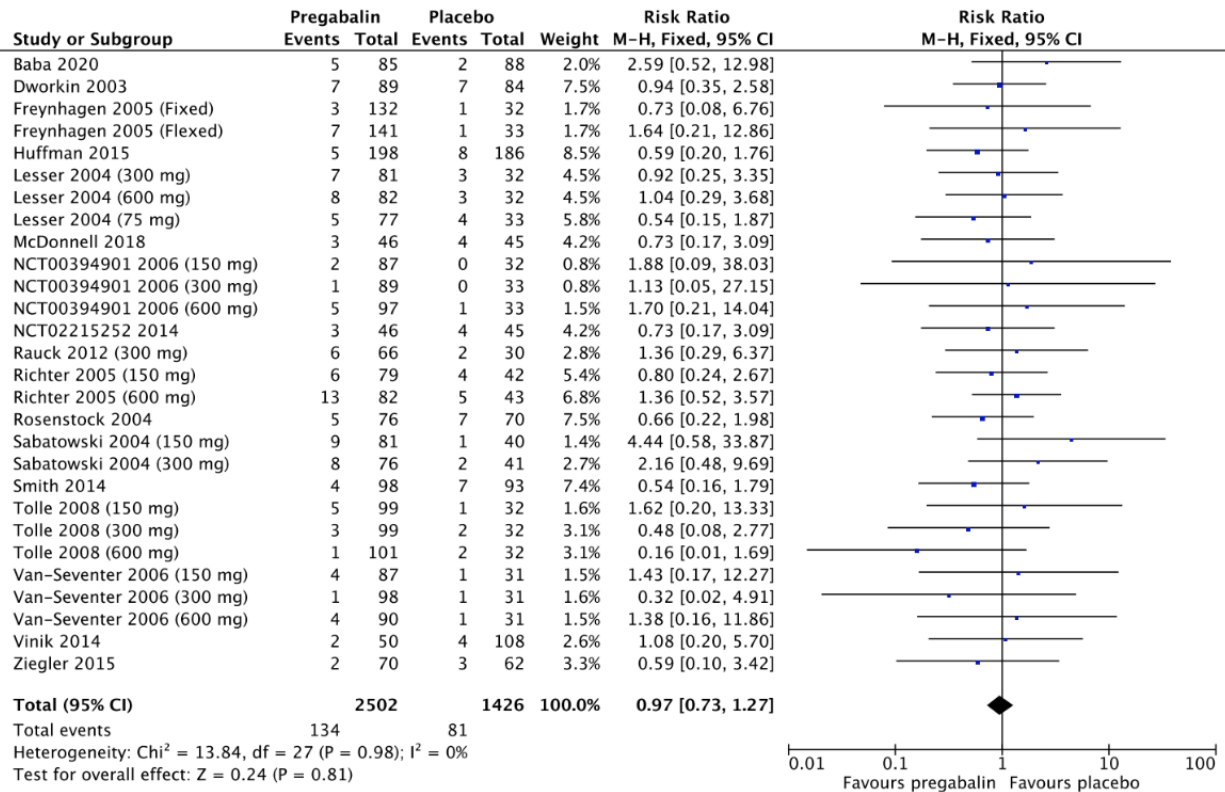

Figure 14.24 Pregabalin versus control; Adverse Event: Hyperglycemia

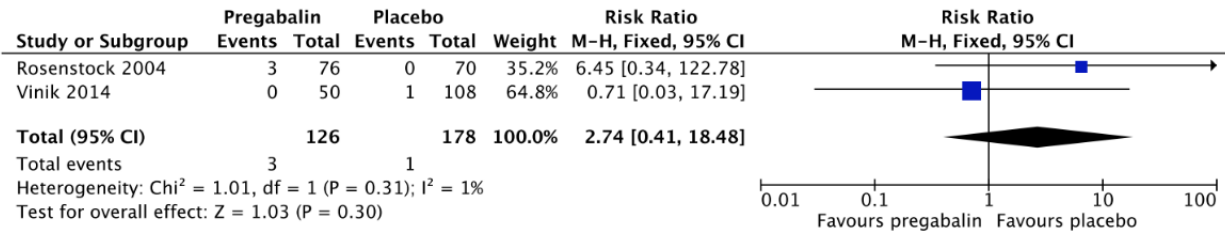

Figure 14.25 Pregabalin versus control; Adverse Event: Increased Appetite

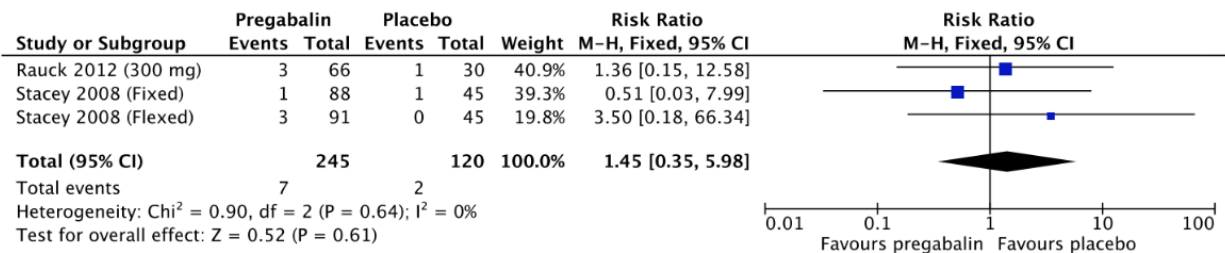

Figure 14.26 Pregabalin versus control; Adverse Event: Increased Pain

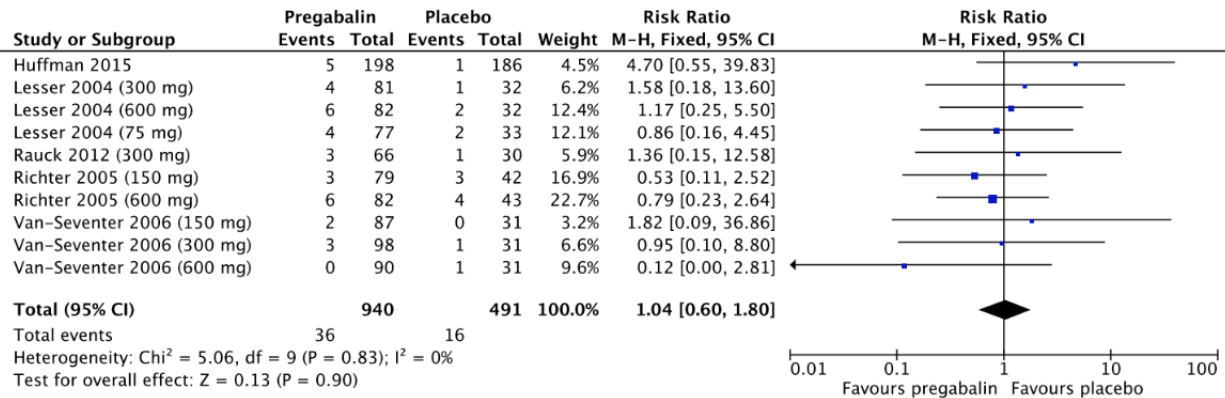

Figure 14.27 Pregabalin versus control; Adverse Event: Increased Sweating

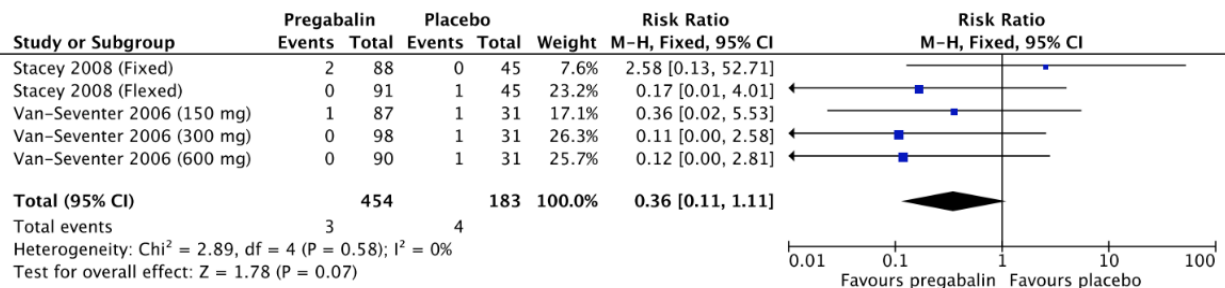

Figure 14.28 Pregabalin versus control; Adverse Event: Infection

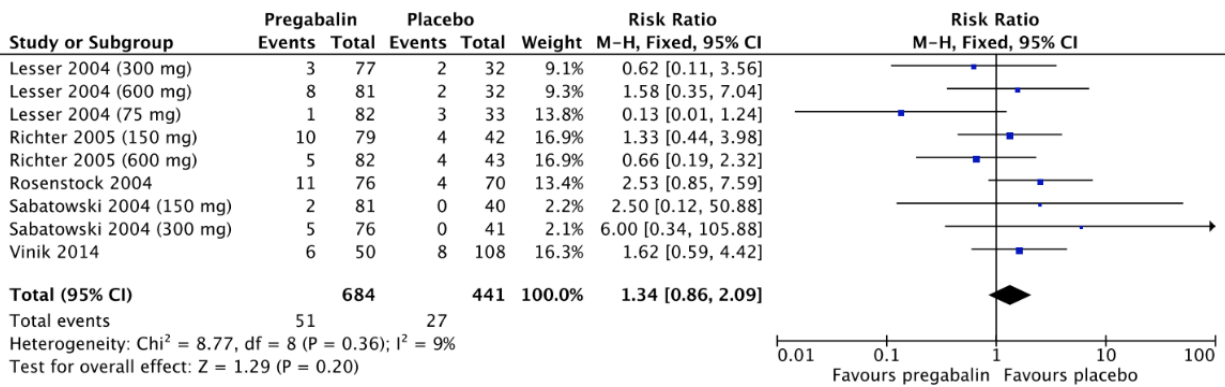

Figure 14.29 Pregabalin versus control; Adverse Event: Injury

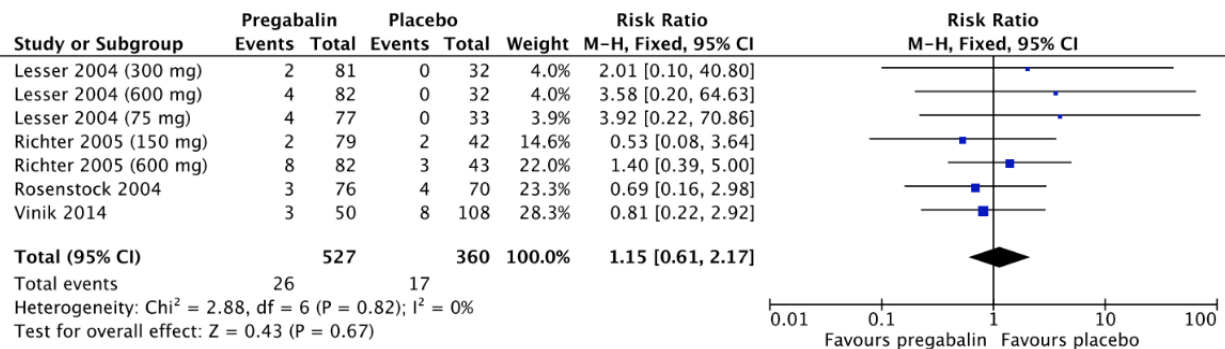

Figure 14.30 Pregabalin versus control; Adverse Event: Lethargy

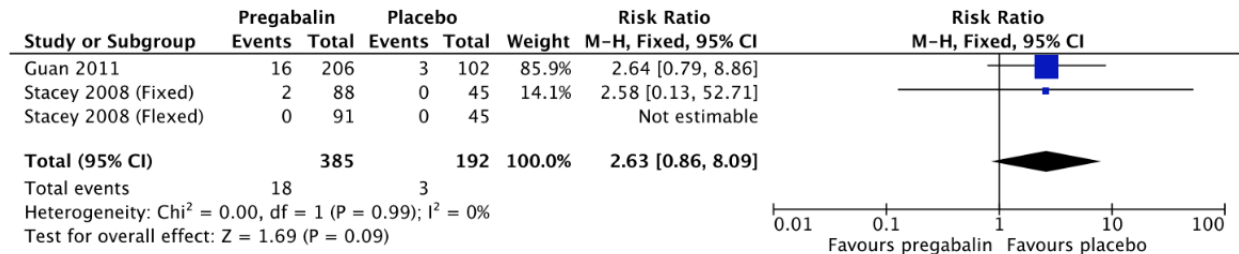

Figure 14.31 Pregabalin versus control; Adverse Event: Muscle Spasm

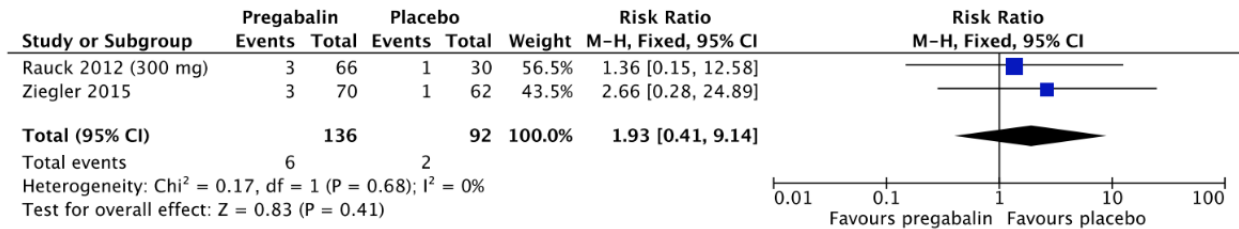

Figure 14.32 Pregabalin versus control; Adverse Event: Nasopharyngitis

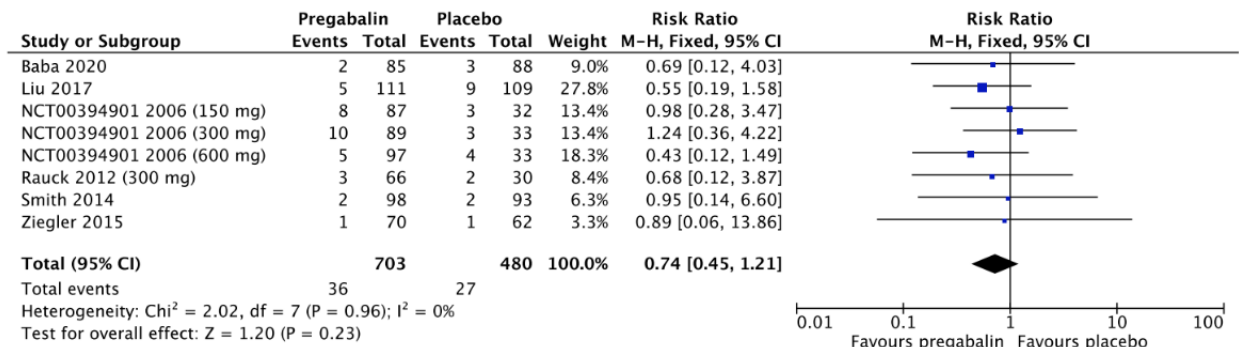

Figure 14.33 Pregabalin versus control; Adverse Event: Nausea

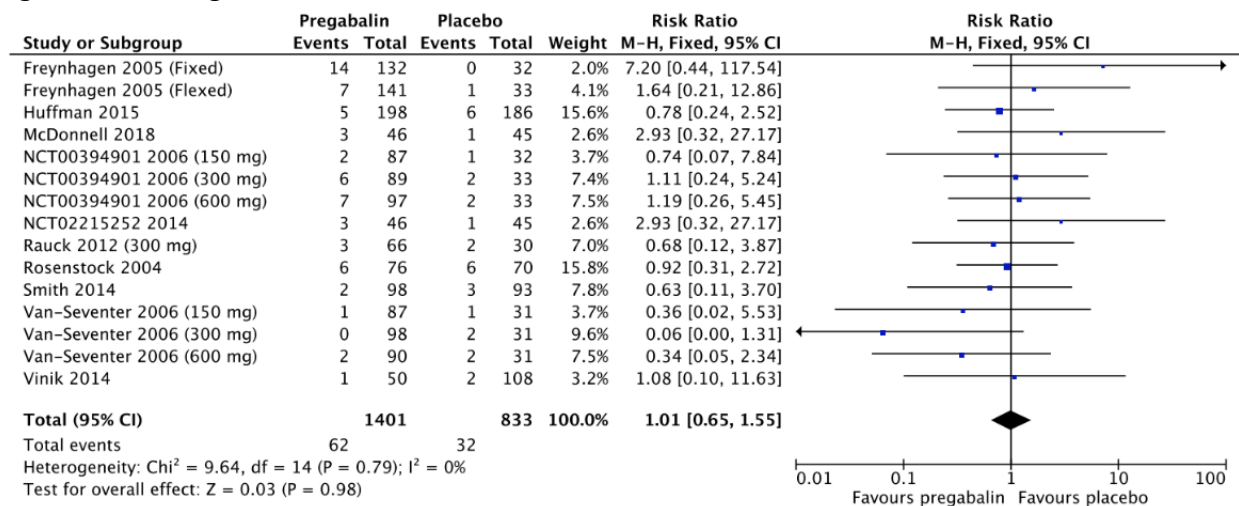

Figure 14.34 Pregabalin versus control; Adverse Event: Peripheral Edema

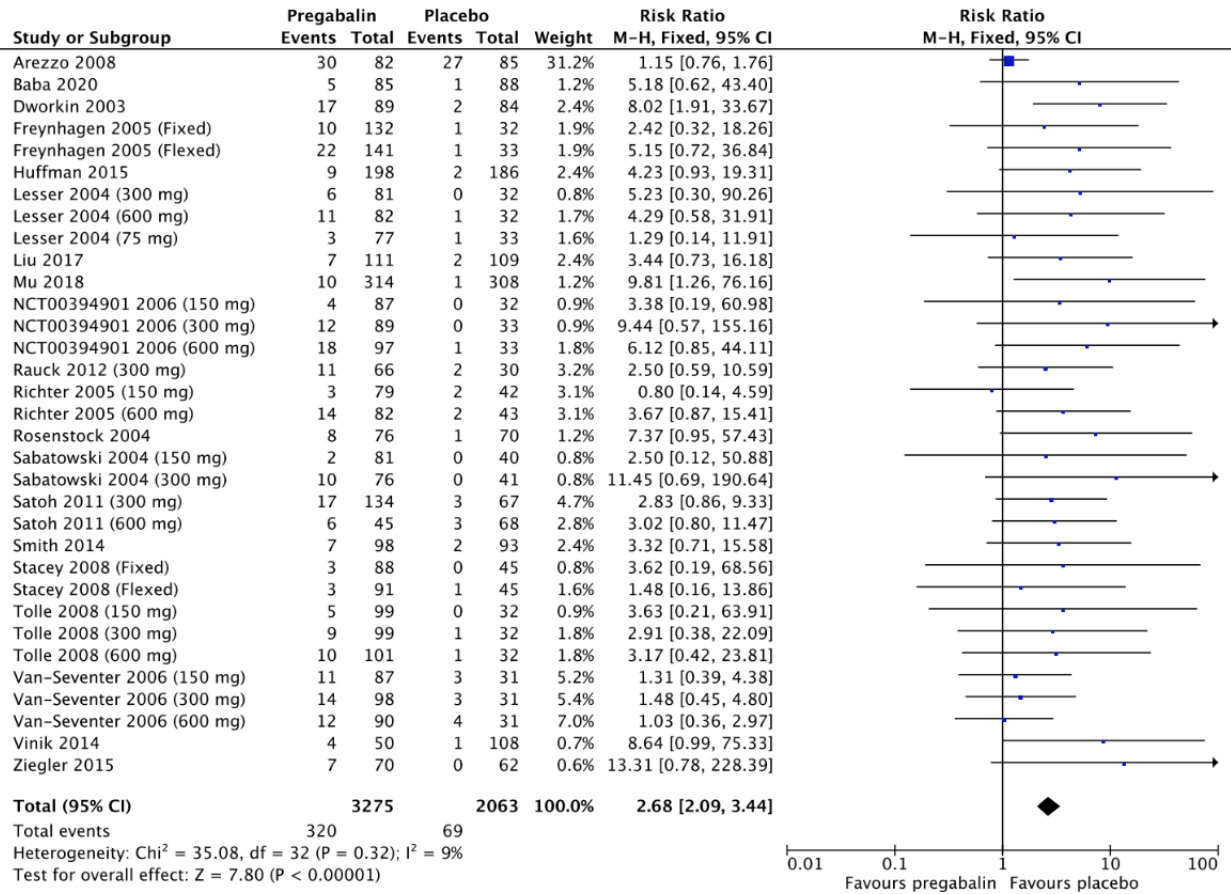

Figure 14.35 Pregabalin versus control; Adverse Event: Serious Adverse Events

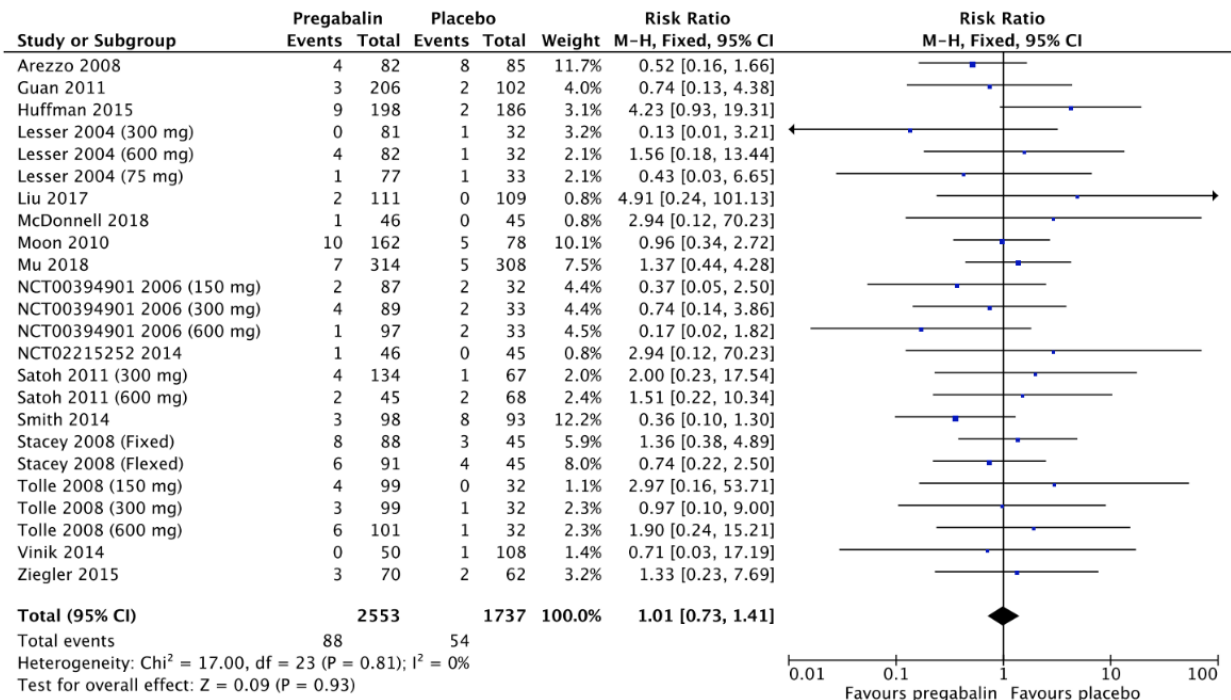

Figure 14.36 Pregabalin versus control; Adverse Event: Somnolence and Fatigue

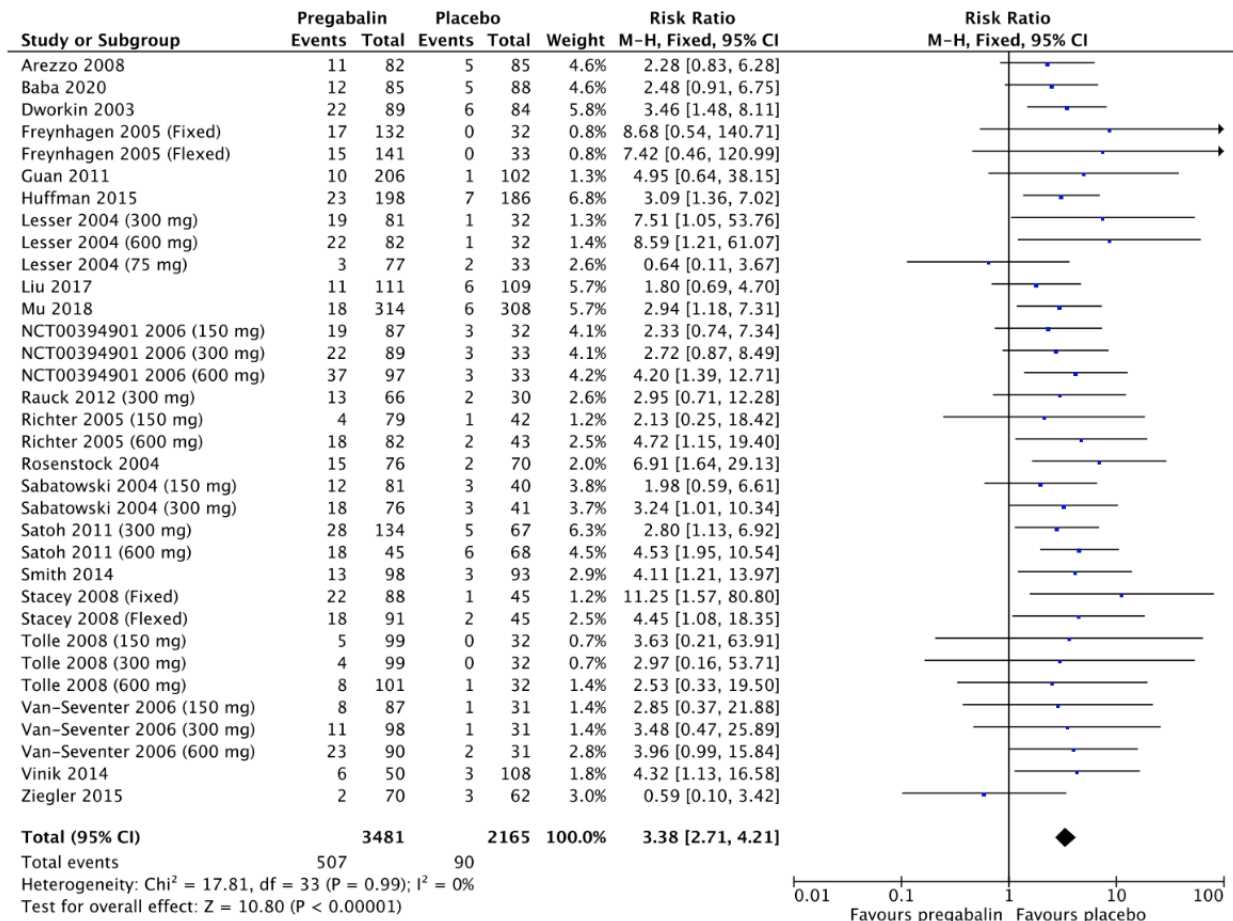

Figure 14.37 Pregabalin versus control; Adverse Event: Upper Respiratory Tract Infection

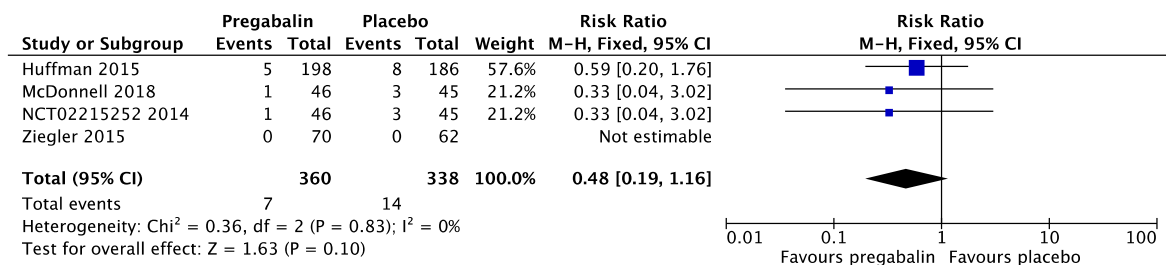

Figure 14.38 Pregabalin versus control; Adverse Event: Urinary Tract Infection

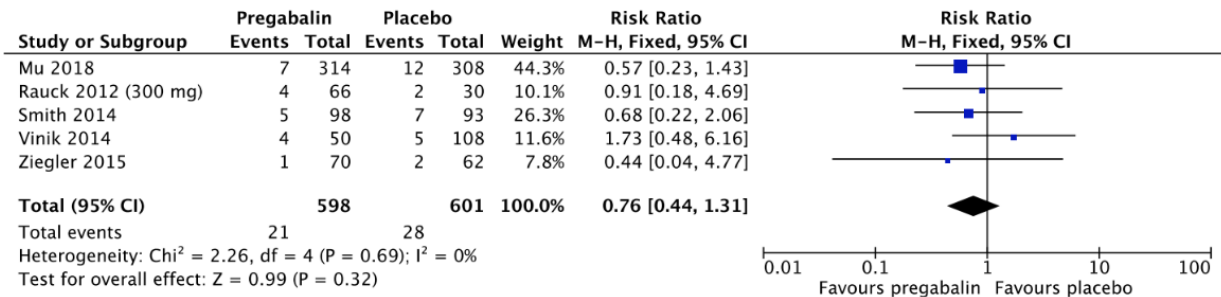

Figure 14.39 Pregabalin versus control; Adverse Event: Vertigo

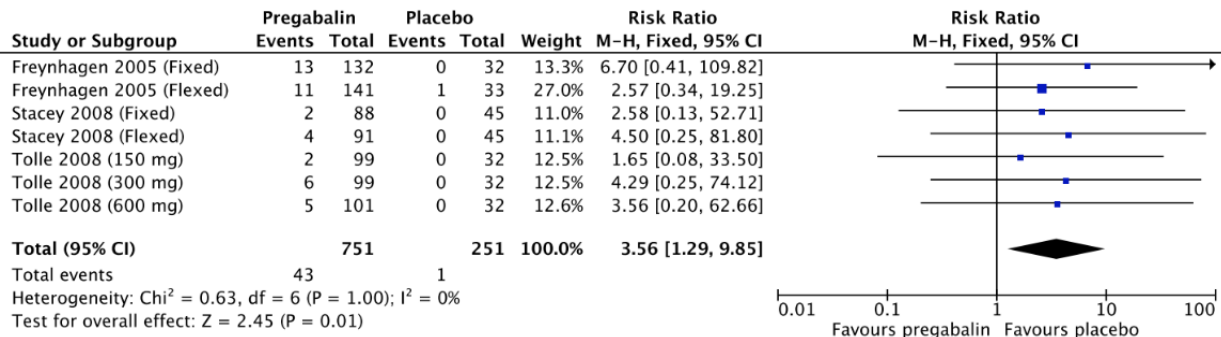

Figure 14.40 Pregabalin versus control; Adverse Event: Vision Problems

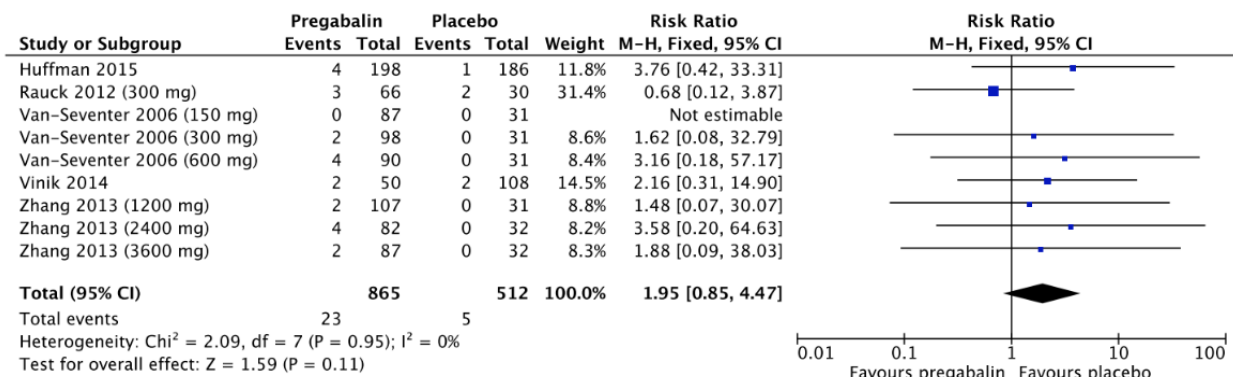

Figure 14.41 Pregabalin versus control; Adverse Event: Vomiting

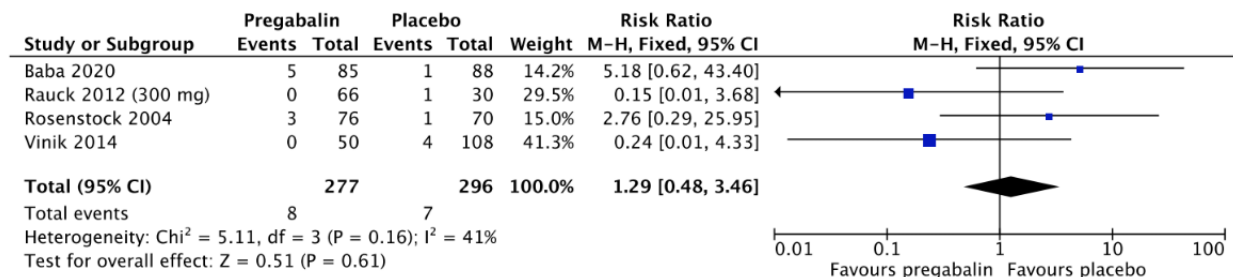



Figure 14.42 Pregabalin versus control; Adverse Event: Weight Gain

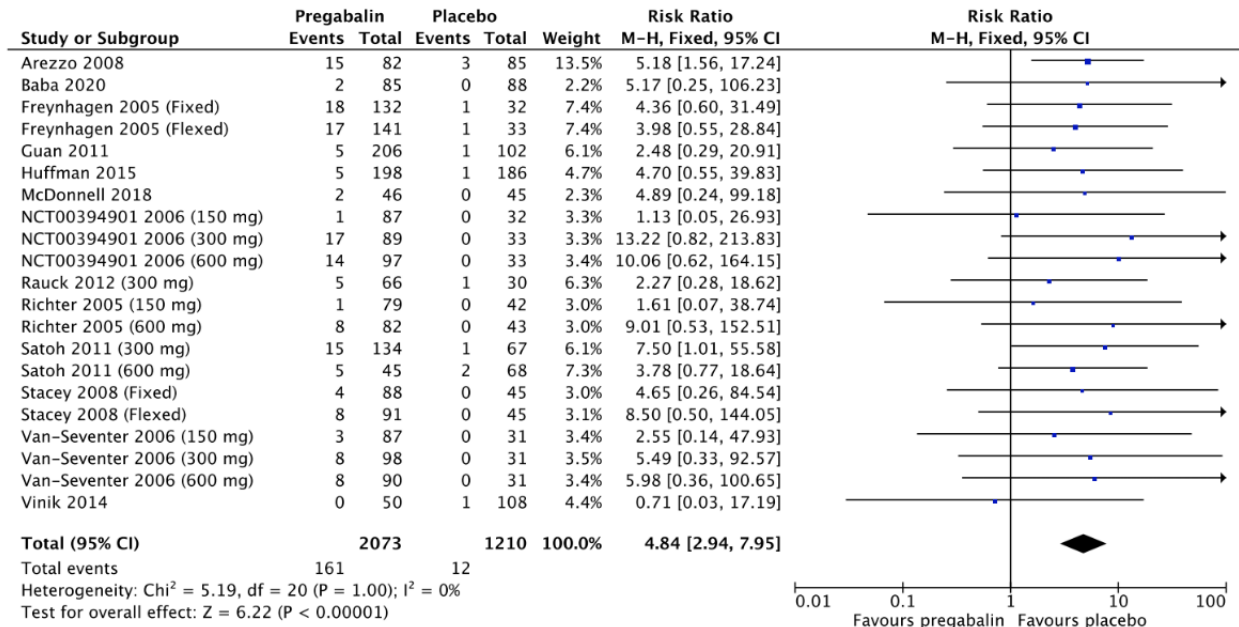

## Anticonvulsants (Topiramate)

Figure 15.1 Topiramate versus control; Withdrawals due to Adverse Events

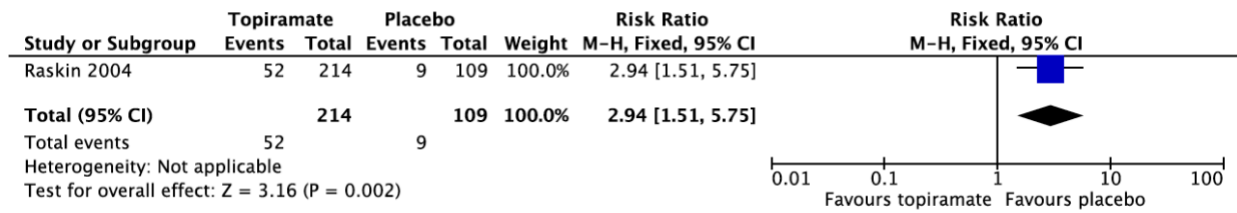

## Opioids

Figure 16.1 Opioids versus control; Withdrawals due to Adverse Events

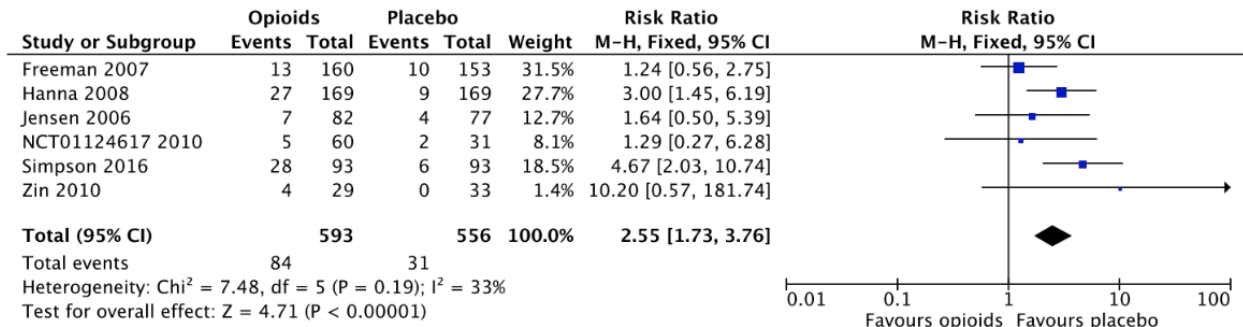

Figure 16.2 Opioids versus control; Adverse Event: Asthenia

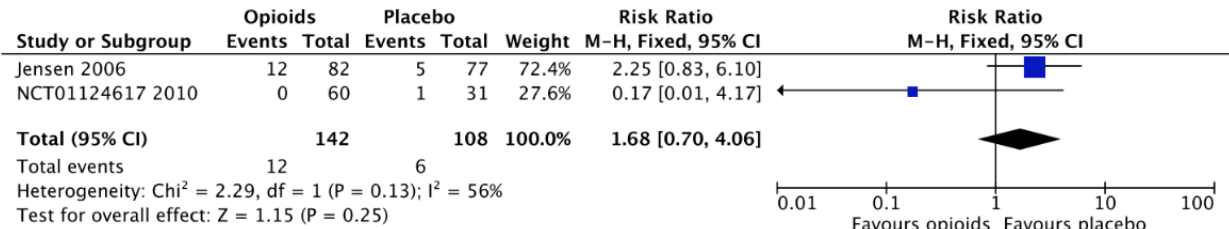

Figure 16.3 Opioids versus control; Adverse Event: Constipation

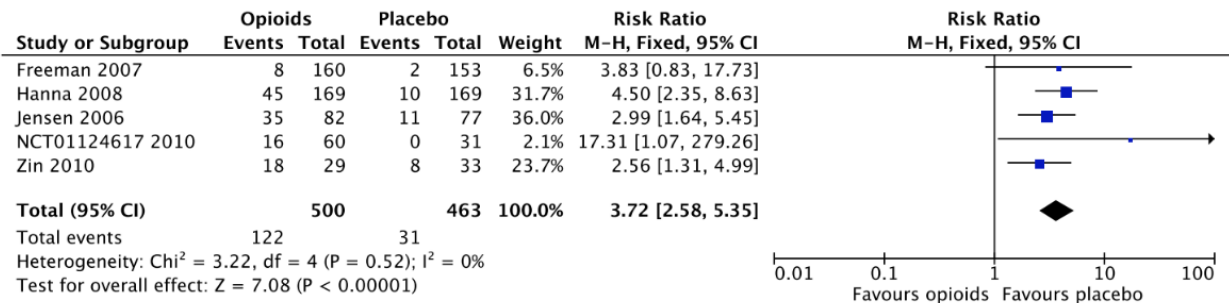

Figure 16.4 Opioids versus control; Adverse Event: Diarrhea

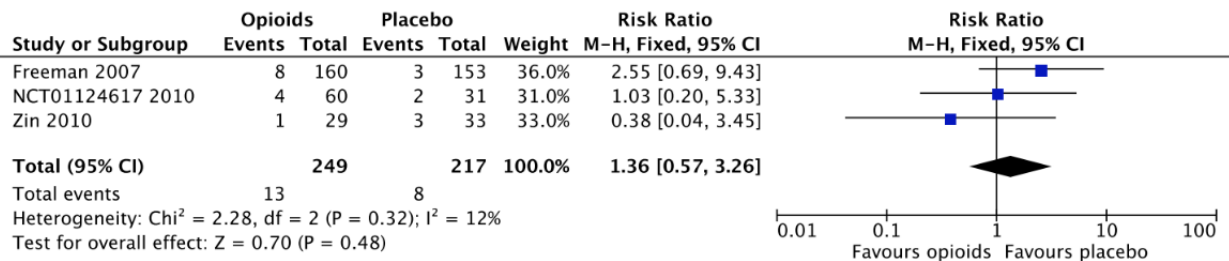

Figure 16.5 Opioids versus control; Adverse Event: Dizziness

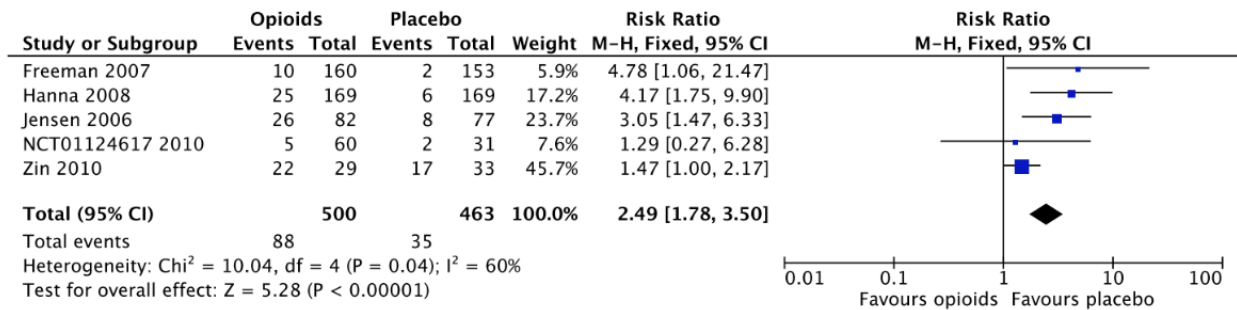

Figure 16.6 Opioids versus control; Adverse Event: Dry Mouth

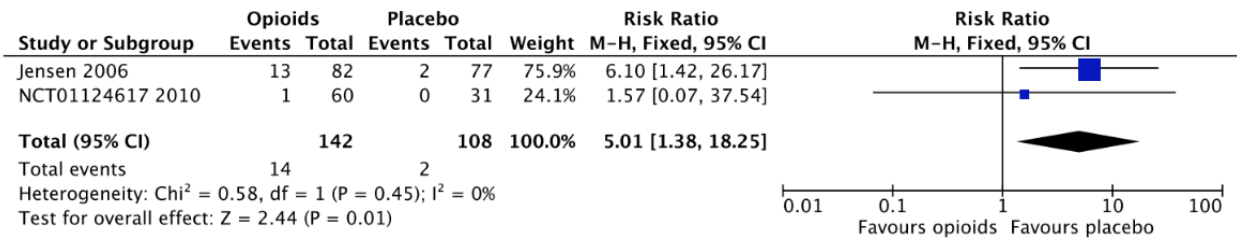

Figure 16.7 Opioids versus control; Adverse Event: Generalized Pain

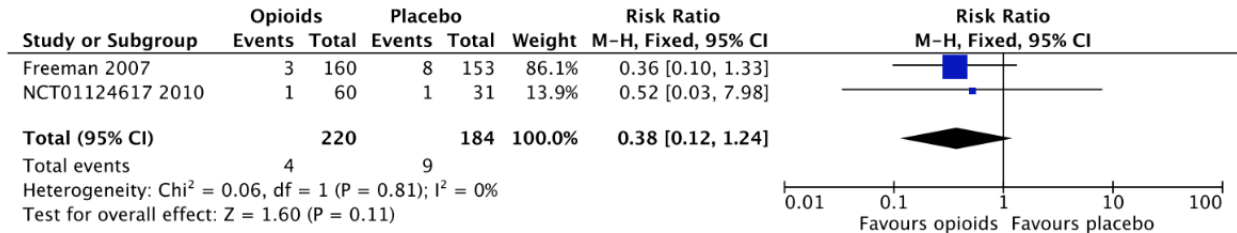

Figure 16.8 Opioids versus control; Adverse Event: Headache

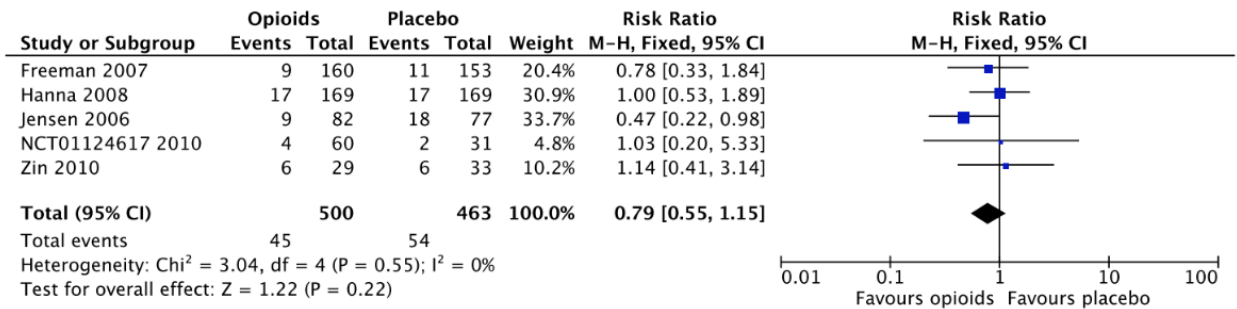

Figure 16.9 Opioids versus control; Adverse Event: Nausea

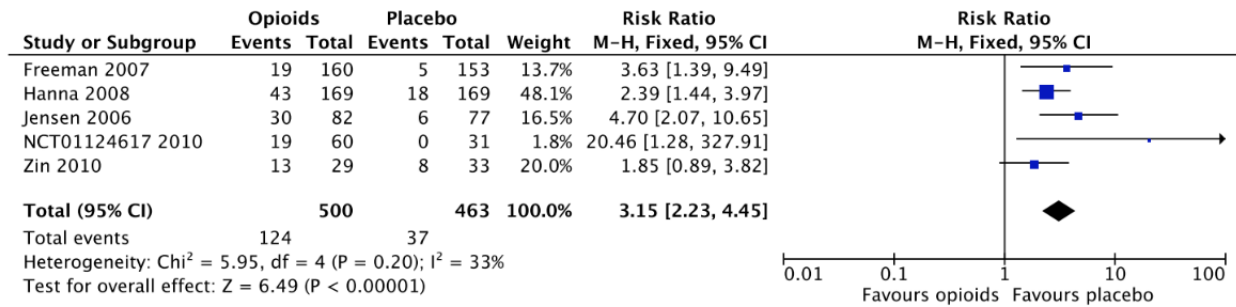

Figure 16.10 Opioids versus control; Adverse Event: Pruritus

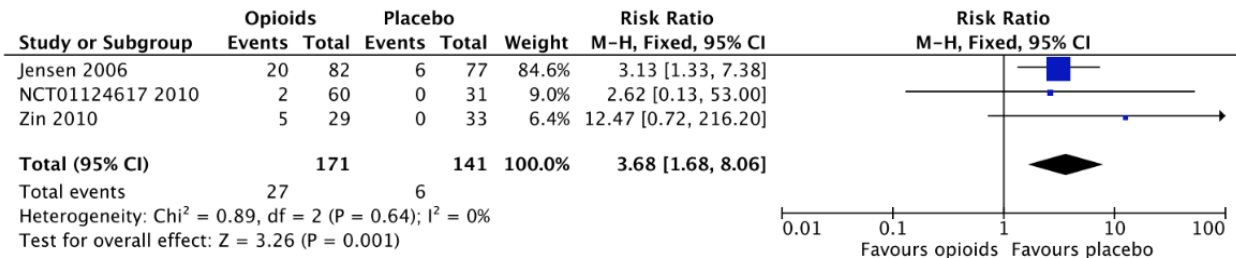

Figure 16.11 Opioids versus control; Adverse Event: Serious Adverse Events

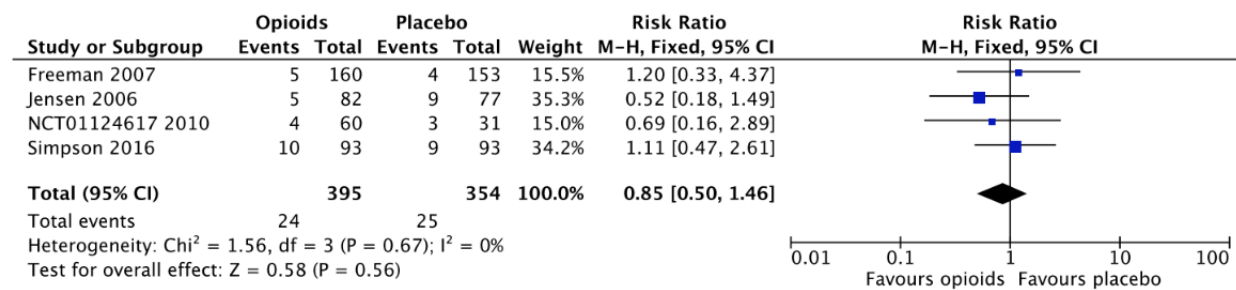

Figure 16.12 Opioids versus control; Adverse Event: Somnolence and Fatigue

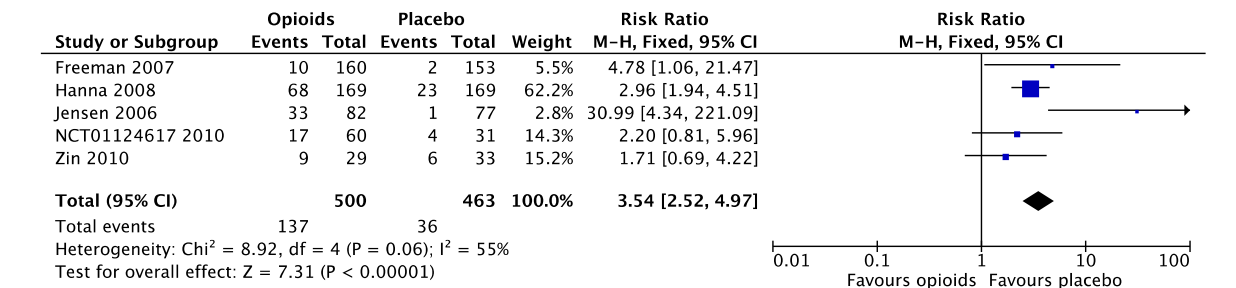

Figure 16.13 Opioids versus control; Adverse Event: Upper Respiratory Tract Infection

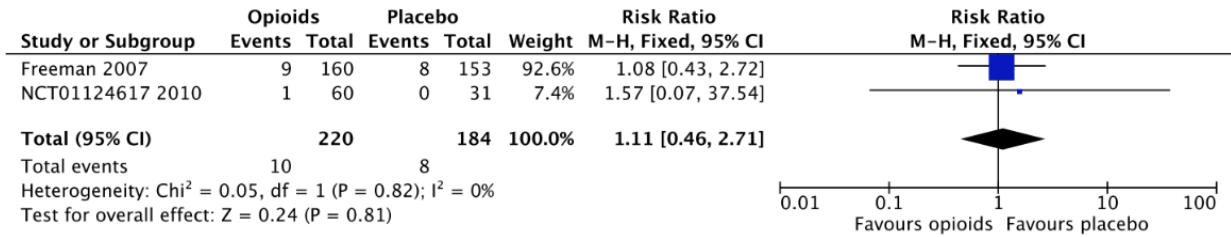

Figure 16.14 Opioids versus control; Adverse Event: Vomiting

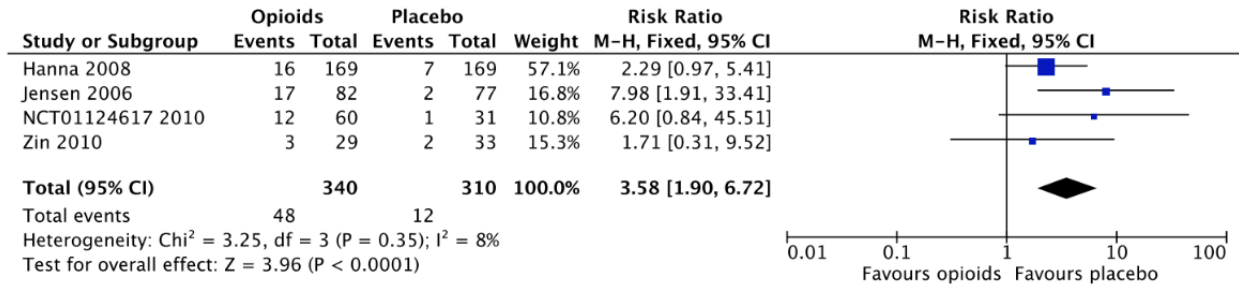

## Rubefacients (Capsaicin)

Figure 17.1 Rubefacients versus control; Withdrawals due to Adverse Events

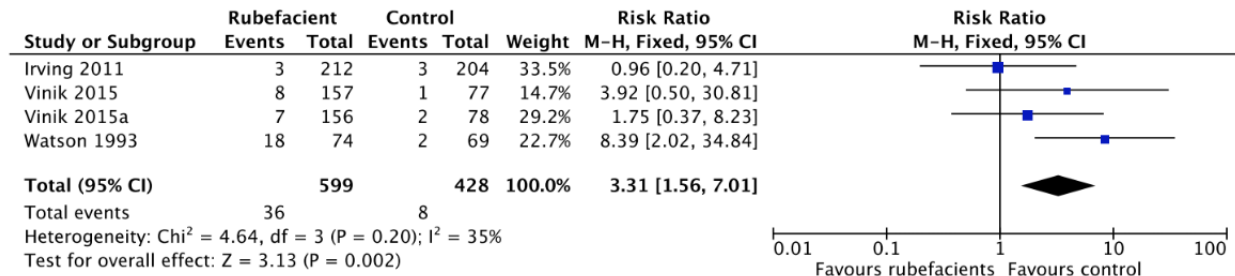

Figure 17.2 Rubefacients versus control; Adverse Event: Back Pain

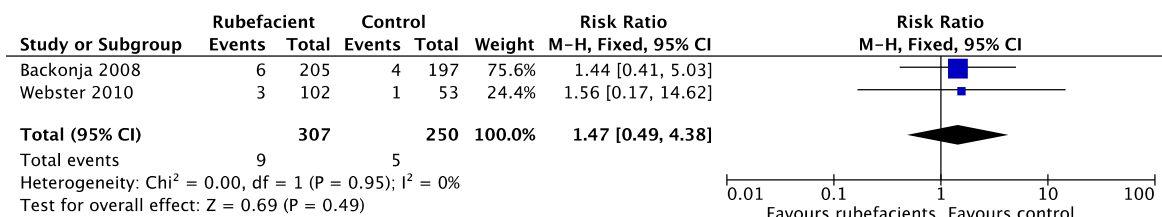

Figure 17.3 Rubefacients versus control; Adverse Event: Coughing and/or Sneezing

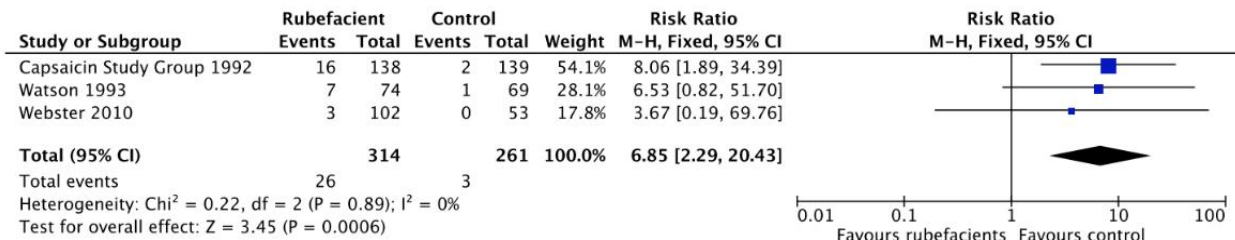

Figure 17.4 Rubefacients versus control; Adverse Event: Dizziness

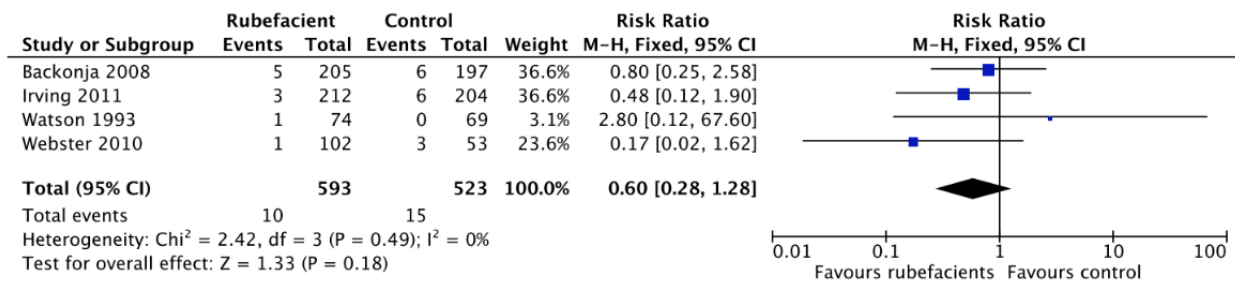

Figure 17.5 Rubefaciants versus control; Adverse Event: Headache

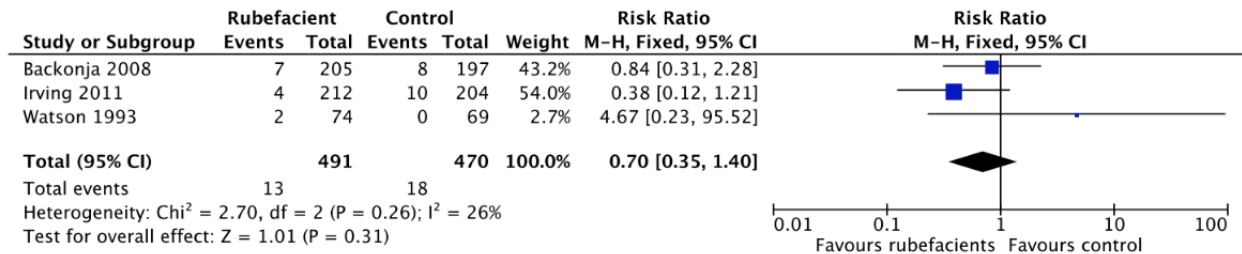

Figure 17.6 Rubefaciants versus control; Adverse Event: Increased Blood Pressure

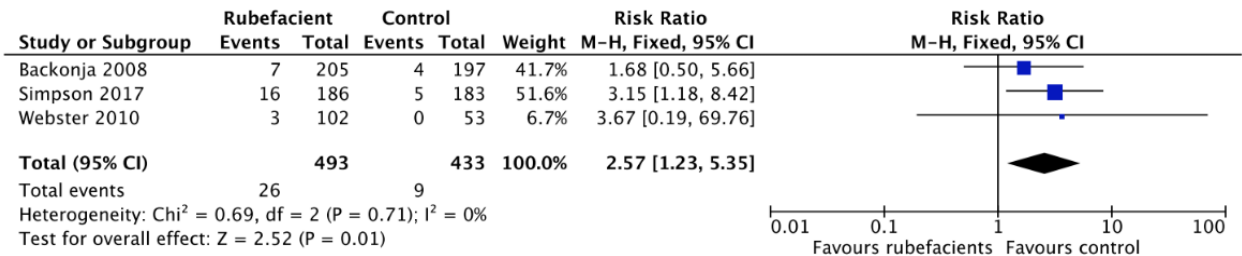

Figure 17.7 Rubefaciants versus control; Adverse Event: Local Reaction (Burning, Stinging, and/or Erythema)

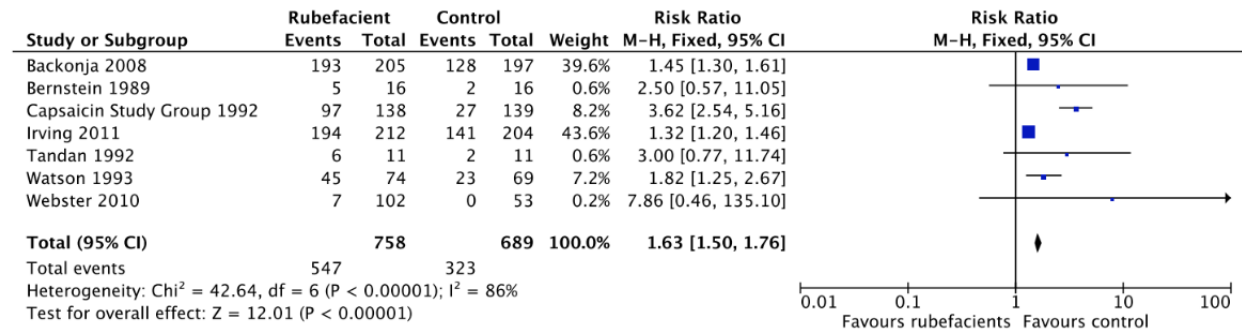

Figure 17.8 Rubefaciants versus control; Adverse Event: Nasopharyngitis

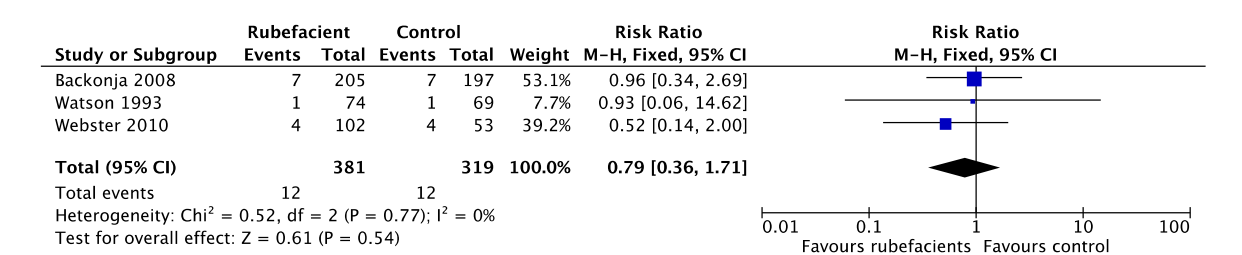



Figure 17.9 Rubefaciens versus control; Adverse Event: Nausea

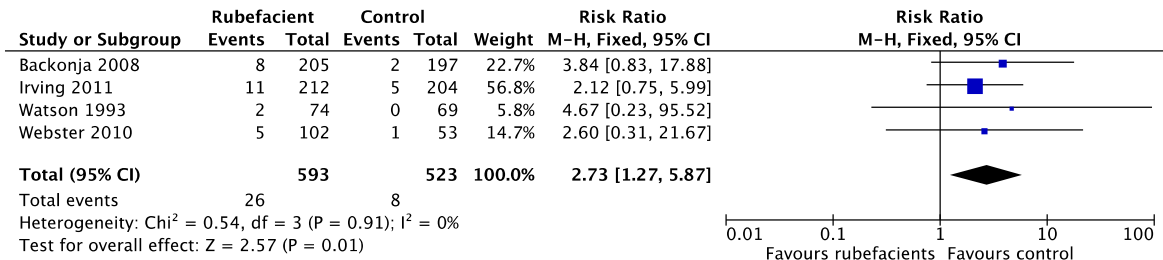

Figure 17.10 Rubefaciens versus control; Adverse Event: Pain at Application Site

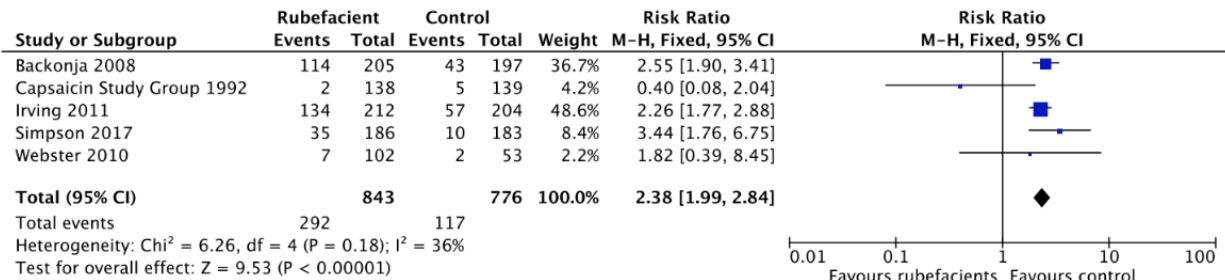

Figure 17.11 Rubefaciens versus control; Adverse Event: Papules at Application Site

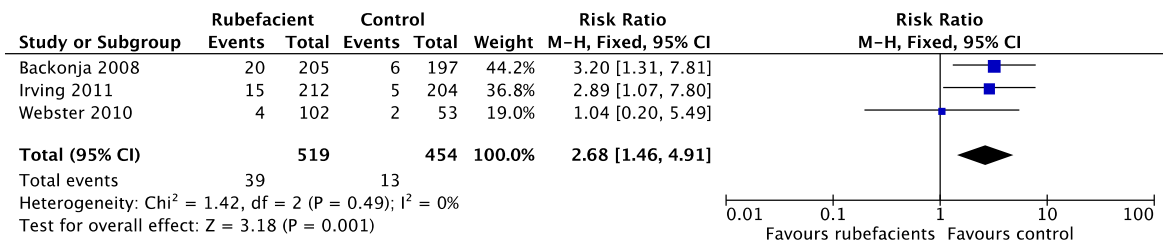

Figure 17.12 Rubefaciens versus control; Adverse Event: Pruritus at Application Site

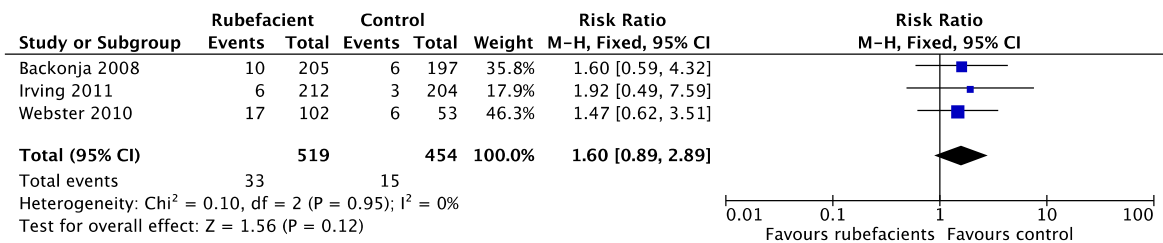

Figure 17.13 Rubefacients versus control; Adverse Event: Serious Adverse Events

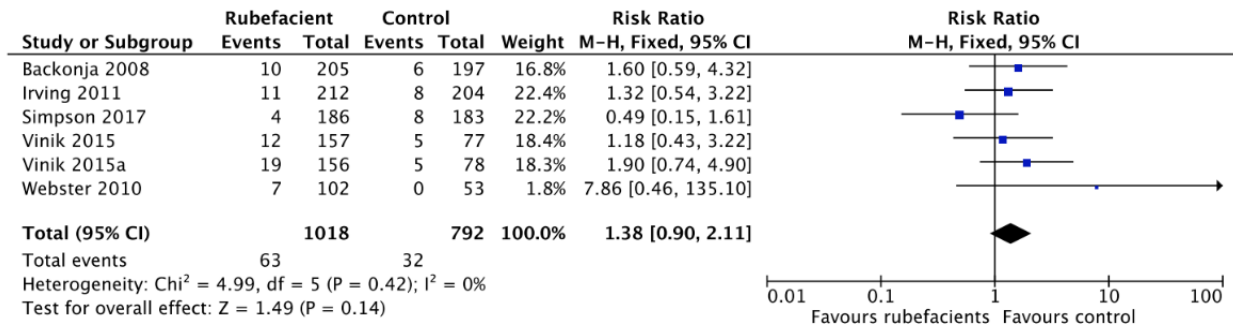

Figure 17.14 Rubefacients versus control; Adverse Event: Sinusitis

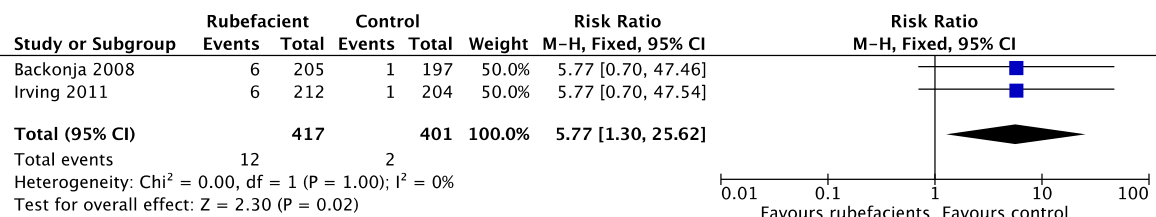

Figure 17.15 Rubefacients versus control; Adverse Event: Swelling at Application Site

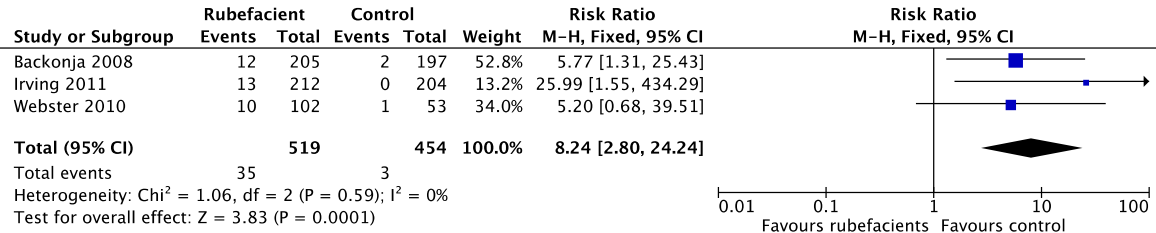

Figure 17.16 Rubefacients versus control; Adverse Event: Unspecific Application Site Reaction

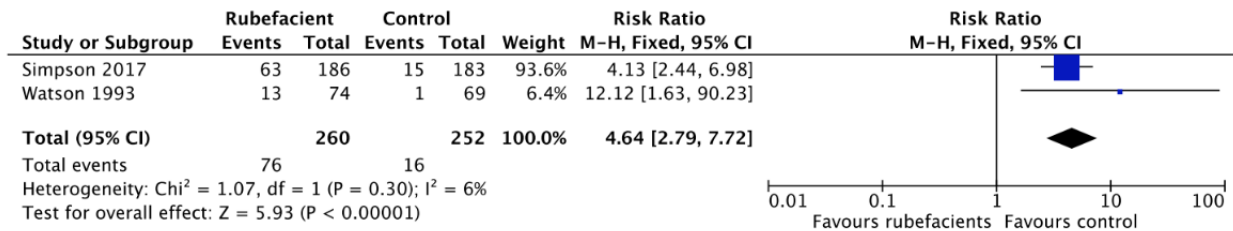

Figure 17.17 Rubefacients versus control; Adverse Event: Upper Respiratory Tract Infection

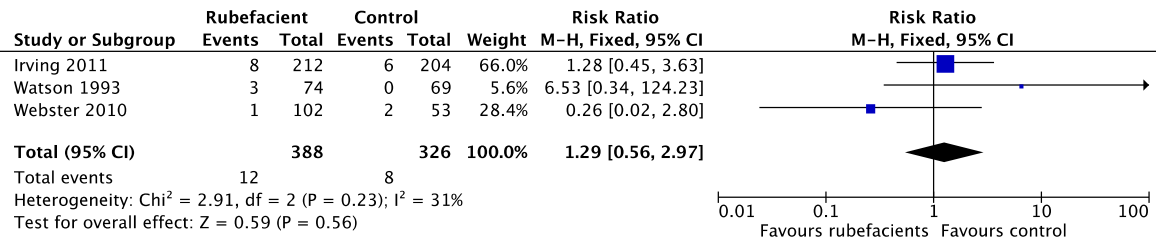

Figure 17.18 Rubefacients versus control; Adverse Event: Vomiting

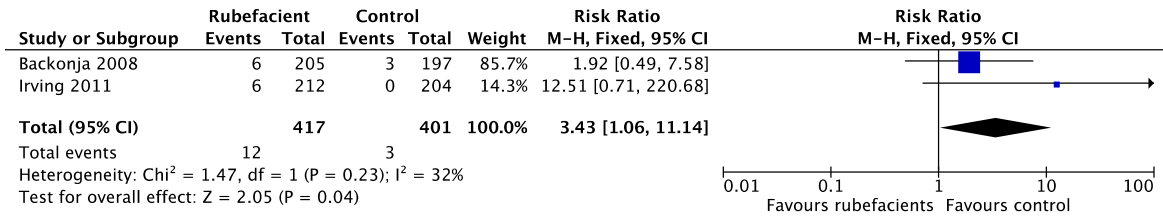

## SNRIs

Figure 18.1 SNRIs versus control; Withdrawals due to Adverse Events

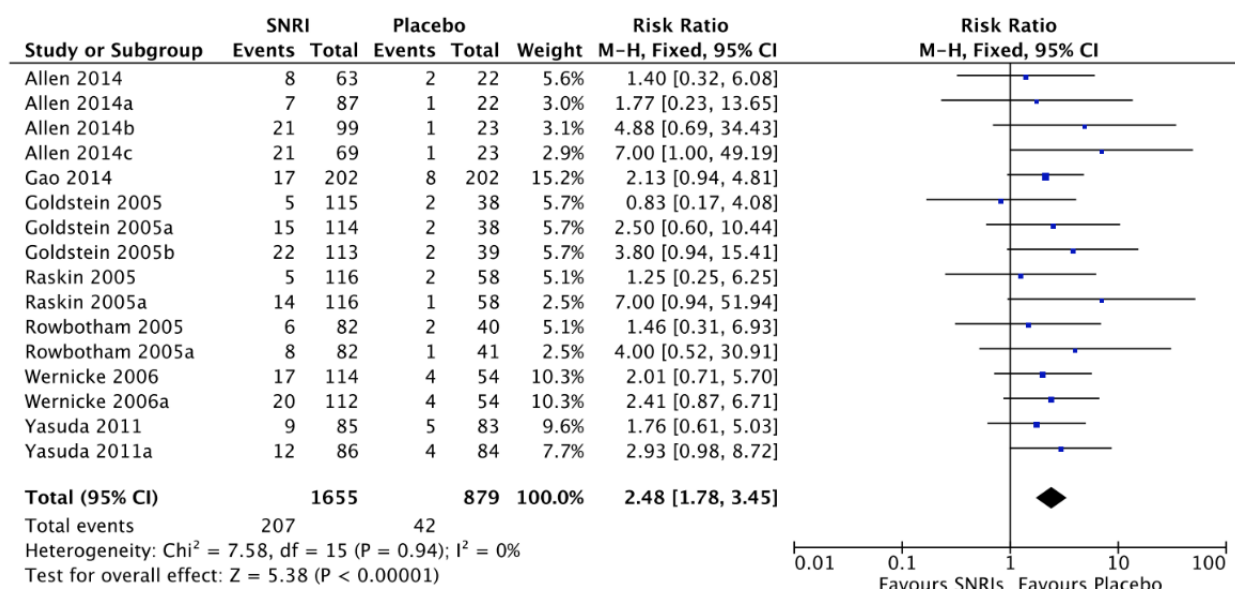

Figure 18.2 SNRIs versus control; Adverse Event: Anorexia

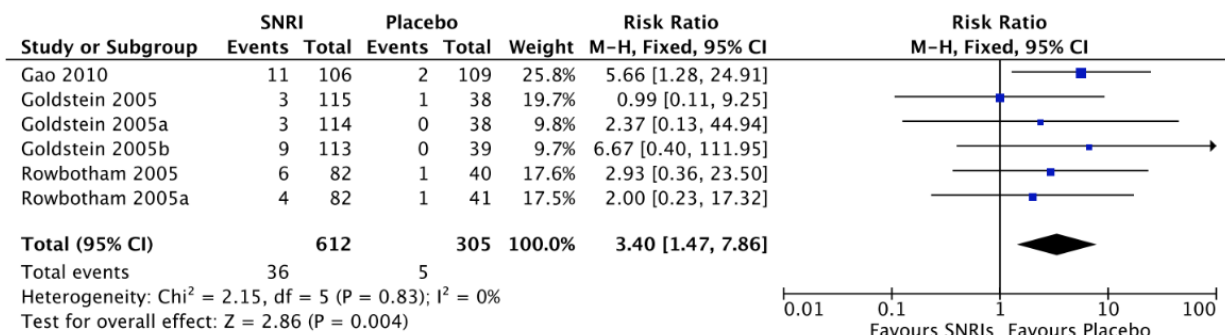

Figure 18.3 SNRIs versus control; Adverse Event: Asthenia

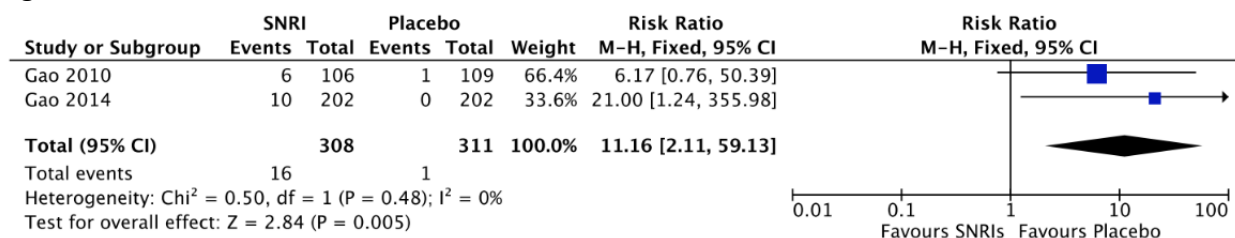

Figure 18.4 SNRIs versus control; Adverse Event: Constipation

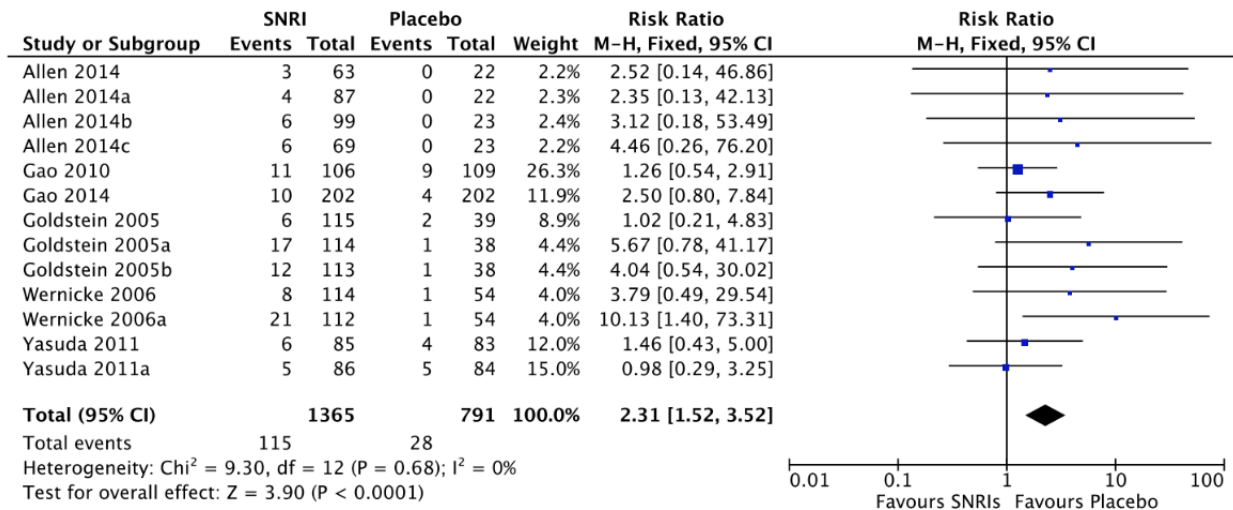

Figure 18.5 SNRIs versus control; Adverse Event: Decreased Appetite

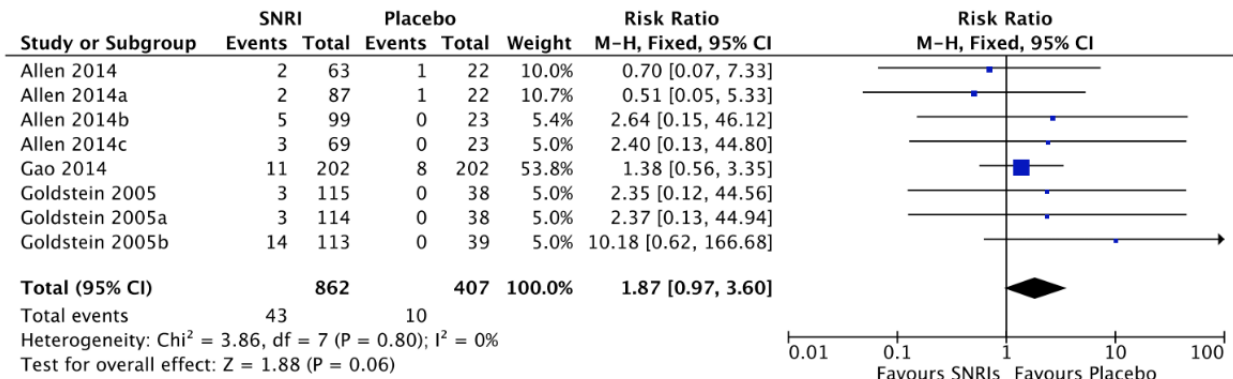

Figure 18.6 SNRIs versus control; Adverse Event: Diarrhea

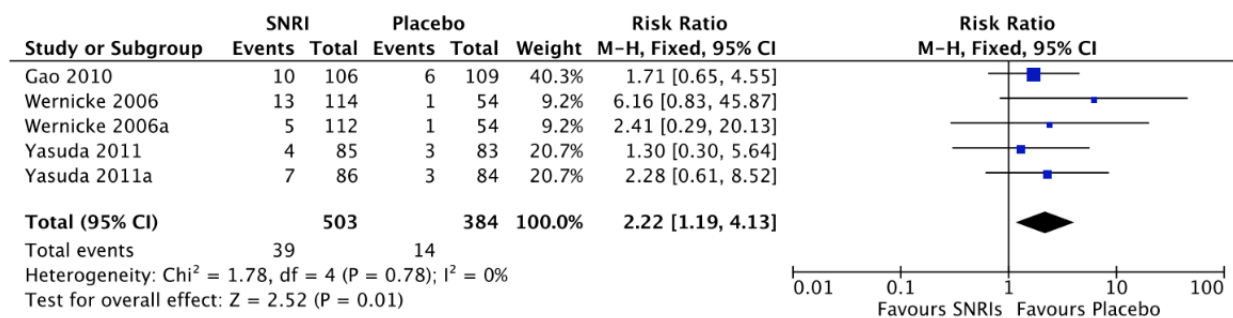

Figure 18.7 SNRIs versus control; Adverse Event: Dizziness

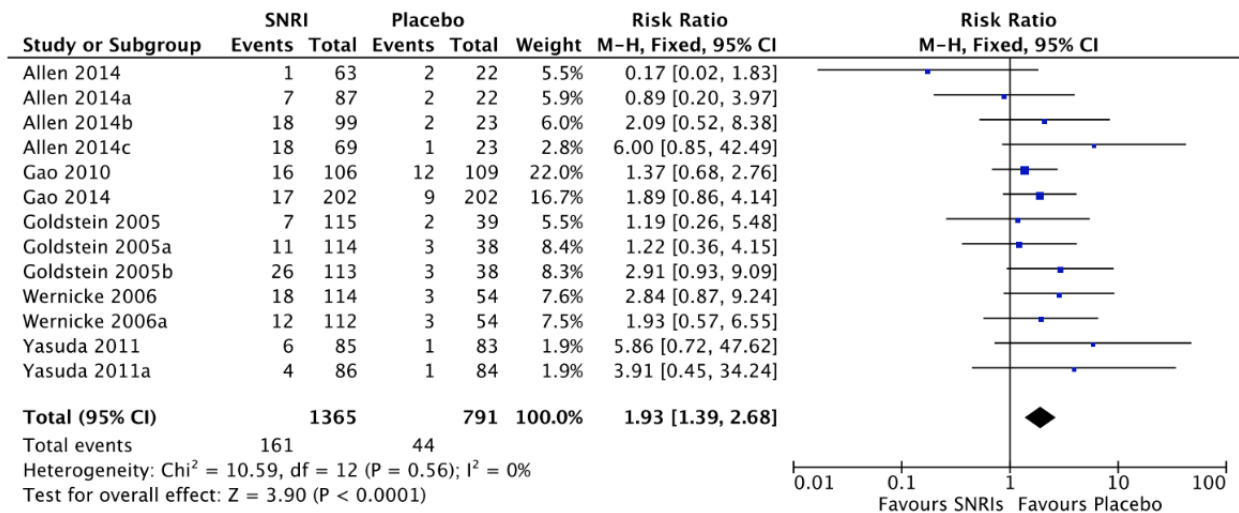

Figure 18.8 SNRIs versus control; Adverse Event: Dry Mouth

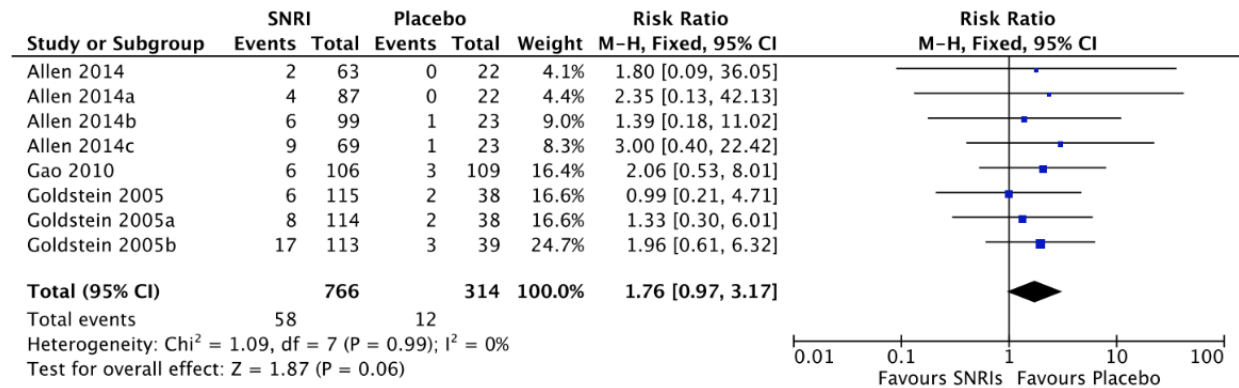

Figure 18.9 SNRIs versus control; Adverse Event: Fatigue

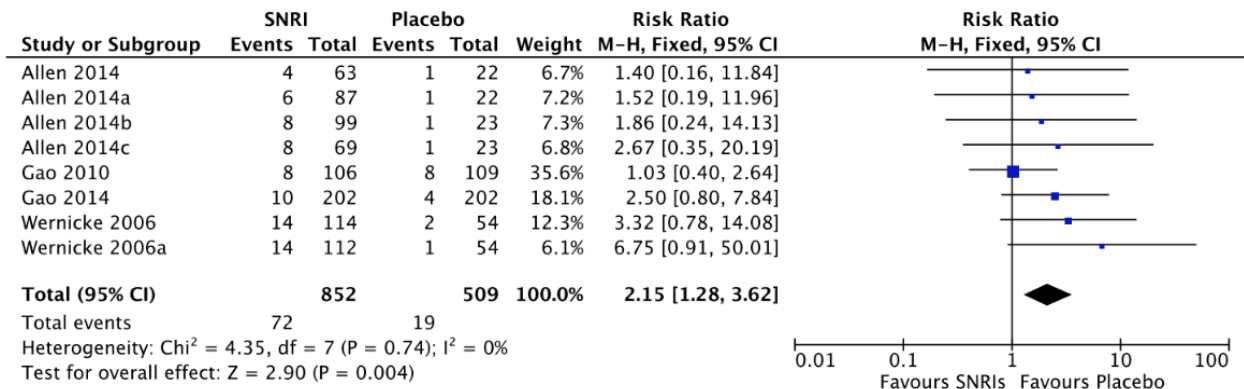

Figure 18.10 SNRIs versus control; Adverse Event: Headache

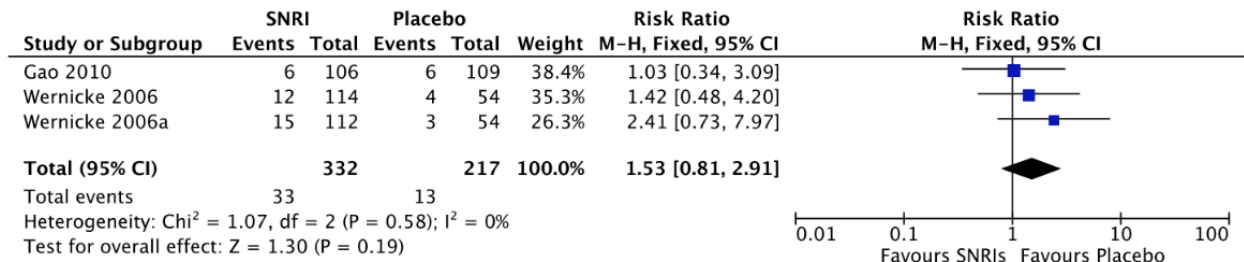

Figure 18.11 SNRIs versus control; Adverse Event: Increased Sweating

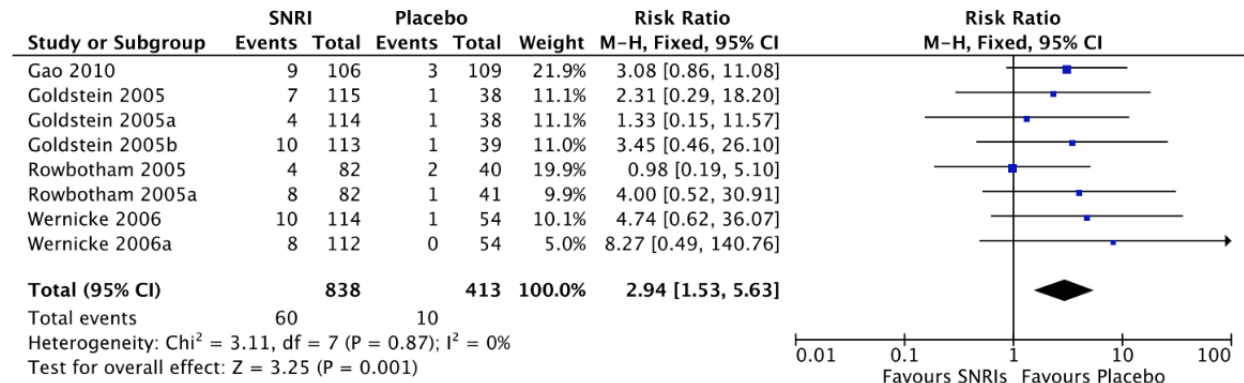

Figure 18.12 SNRIs versus control; Adverse Event: Insomnia

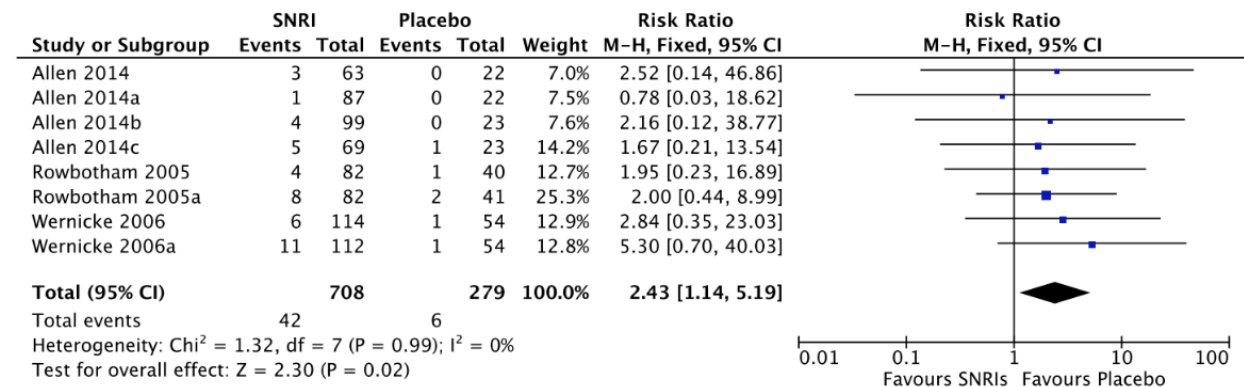

Figure 18.13 SNRIs versus control; Adverse Event: Lethargy

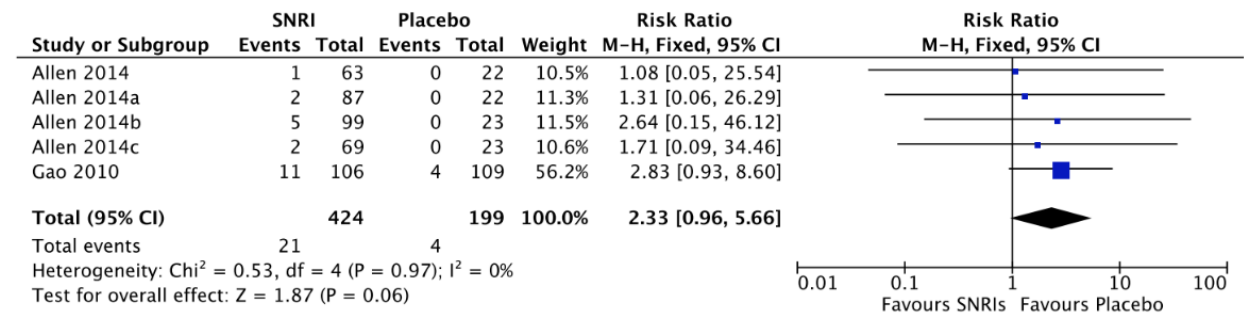

Figure 18.14 SNRIs versus control; Adverse Event: Nasopharyngitis

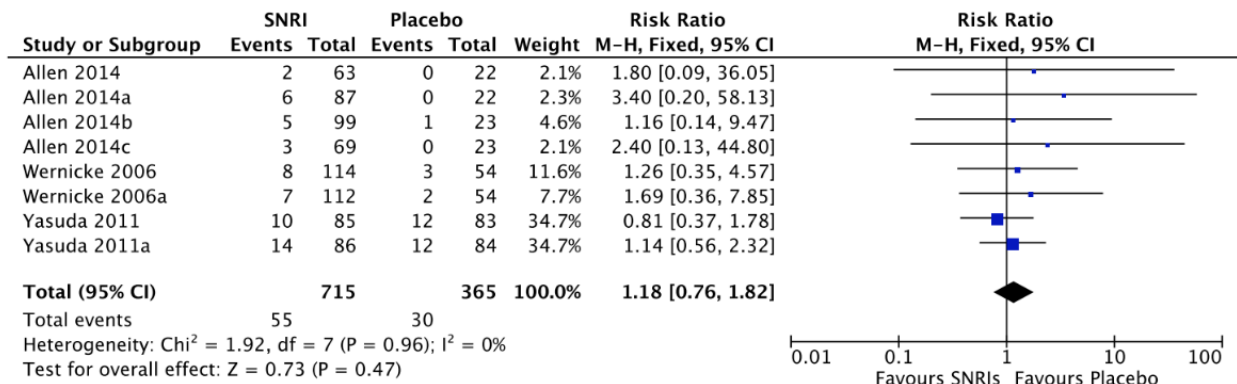

Figure 18.15 SNRIs versus control; Adverse Event: Nausea

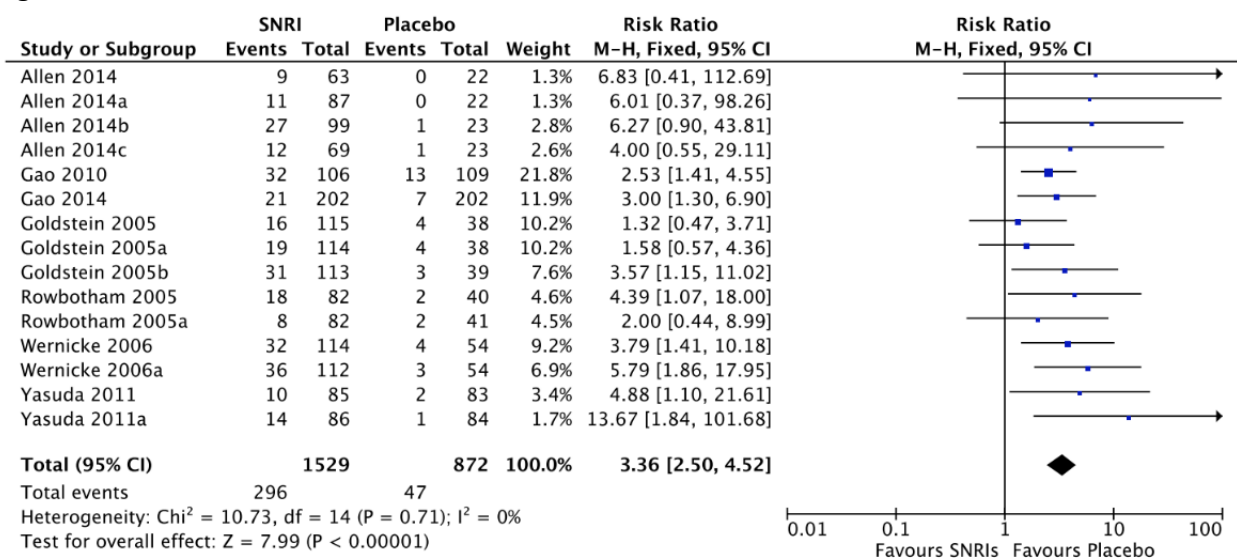



Figure 18.16 SNRIs versus control; Adverse Event: Serious Adverse Events

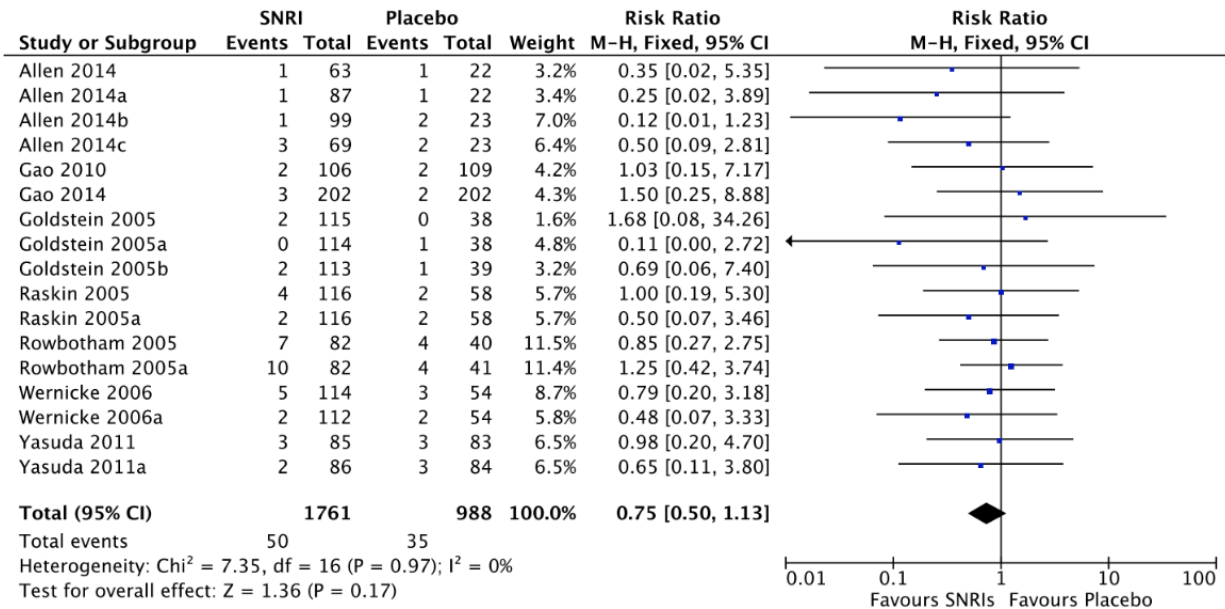

Figure 18.17 SNRIs versus control; Adverse Event: Somnolence and Fatigue

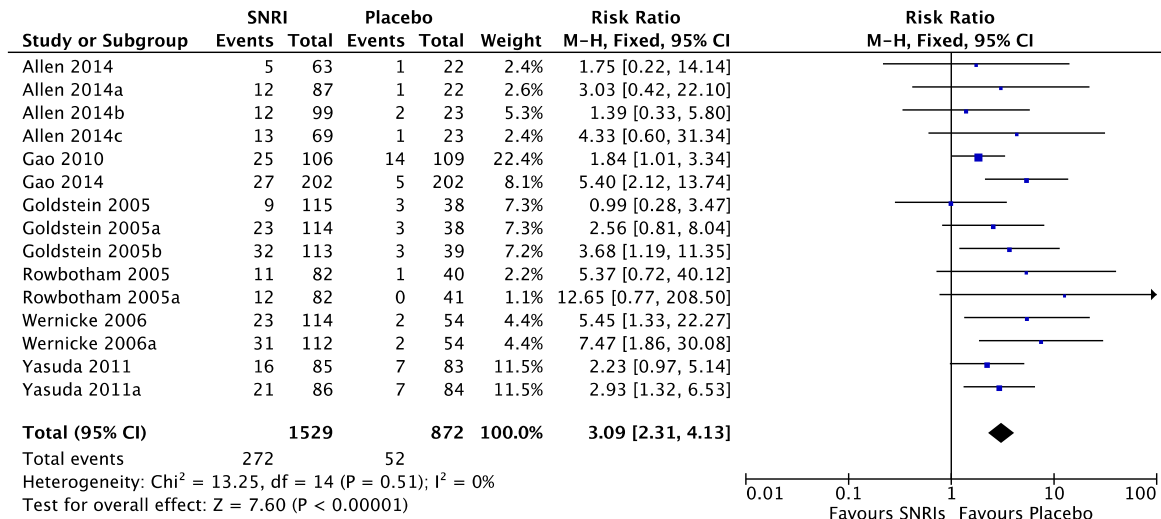

Figure 18.18 SNRIs versus control; Adverse Event: Sustained Hypertension

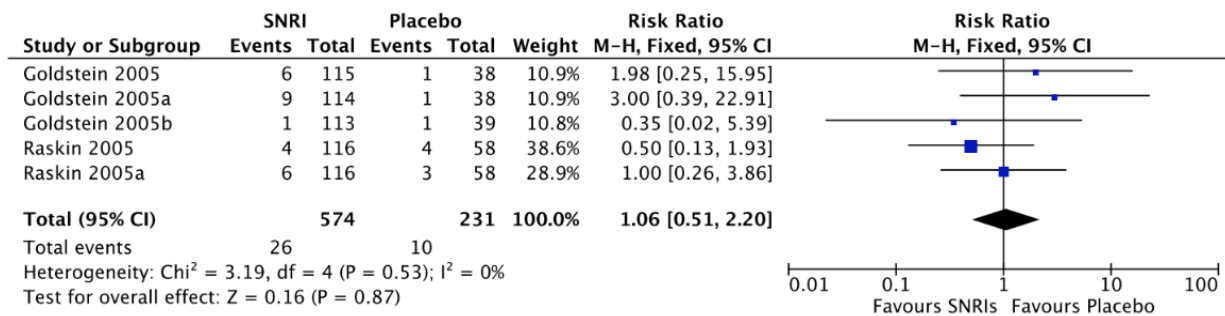

Figure 18.19 SNRIs versus control; Adverse Event: Vomiting

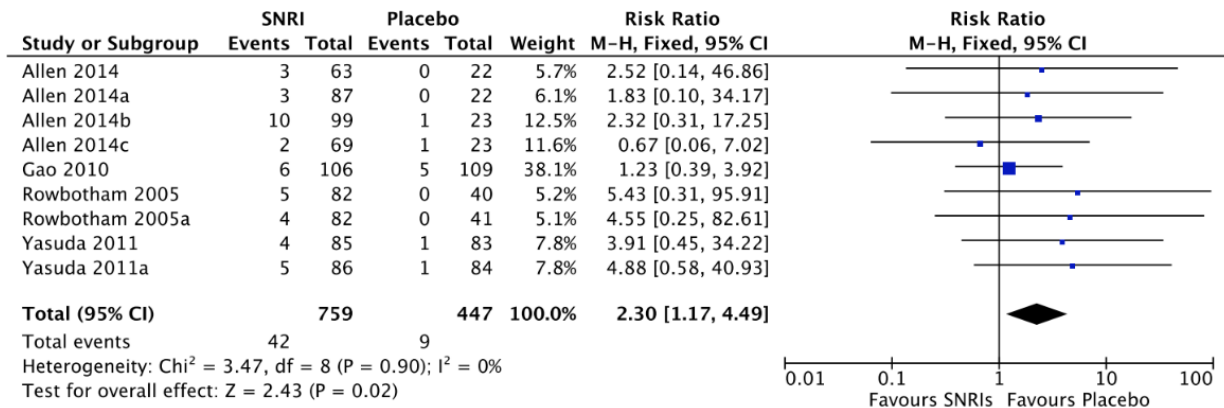

## Funnel Plots

Funnel plots were generated via RevMan for interventions with  $\geq 8$  studies. This information was used in the GRADE process to assess potential publication bias.

**Figure 19.1 Anticonvulsants**

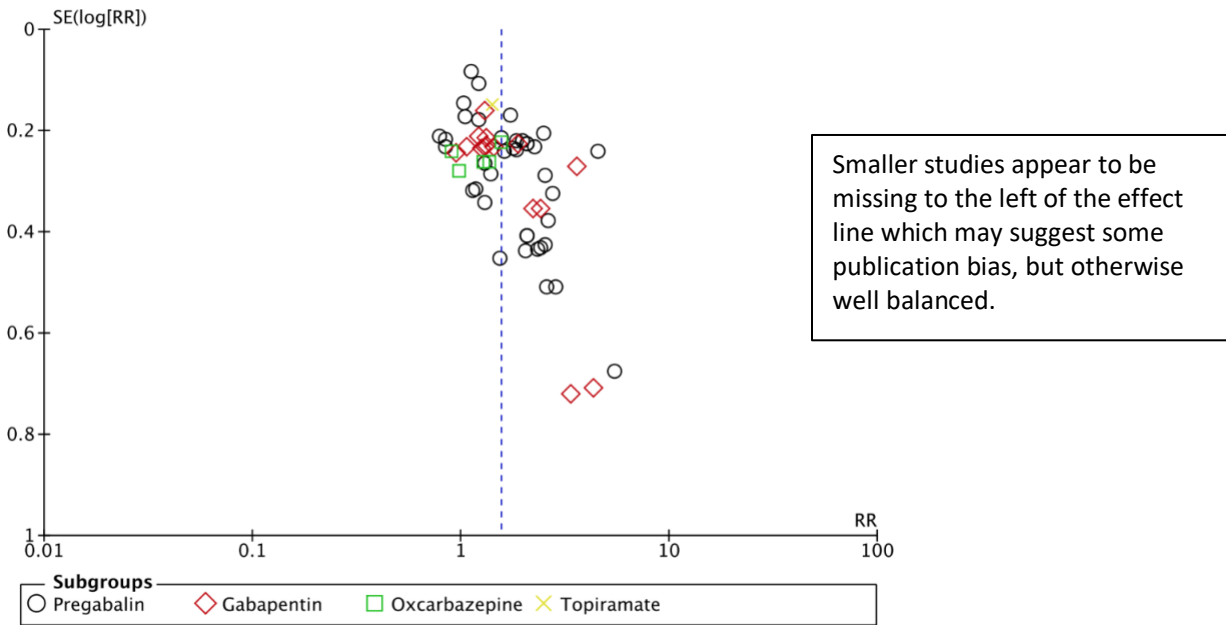

**Figure 19.2 Rubefaciants**

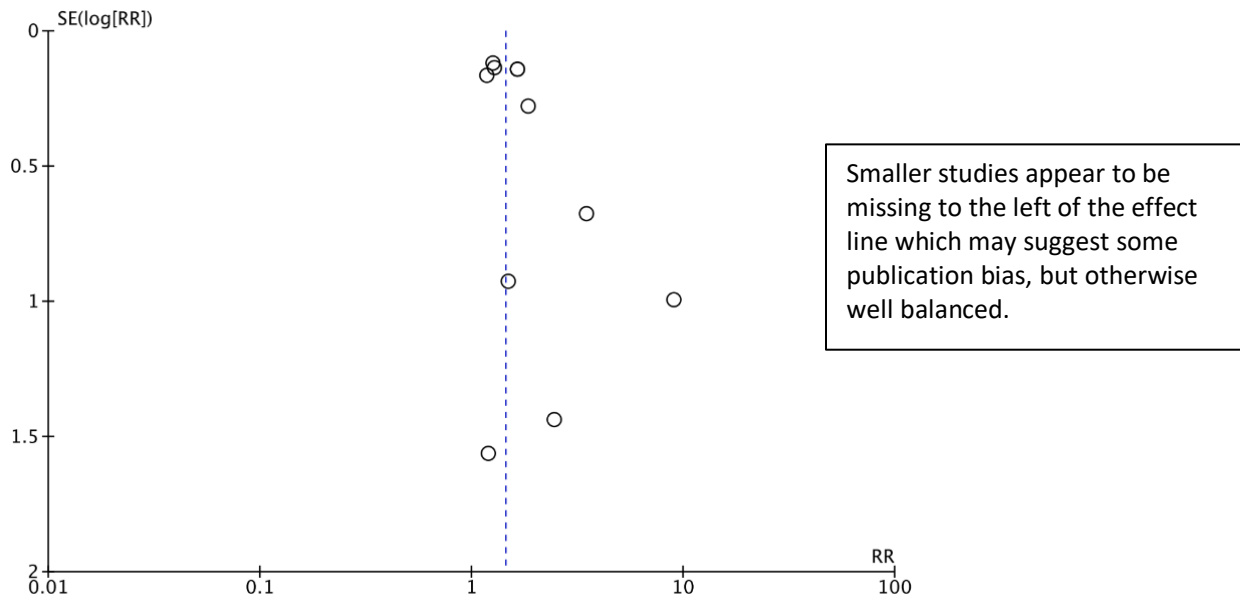

Figure 19.3 SNRIs

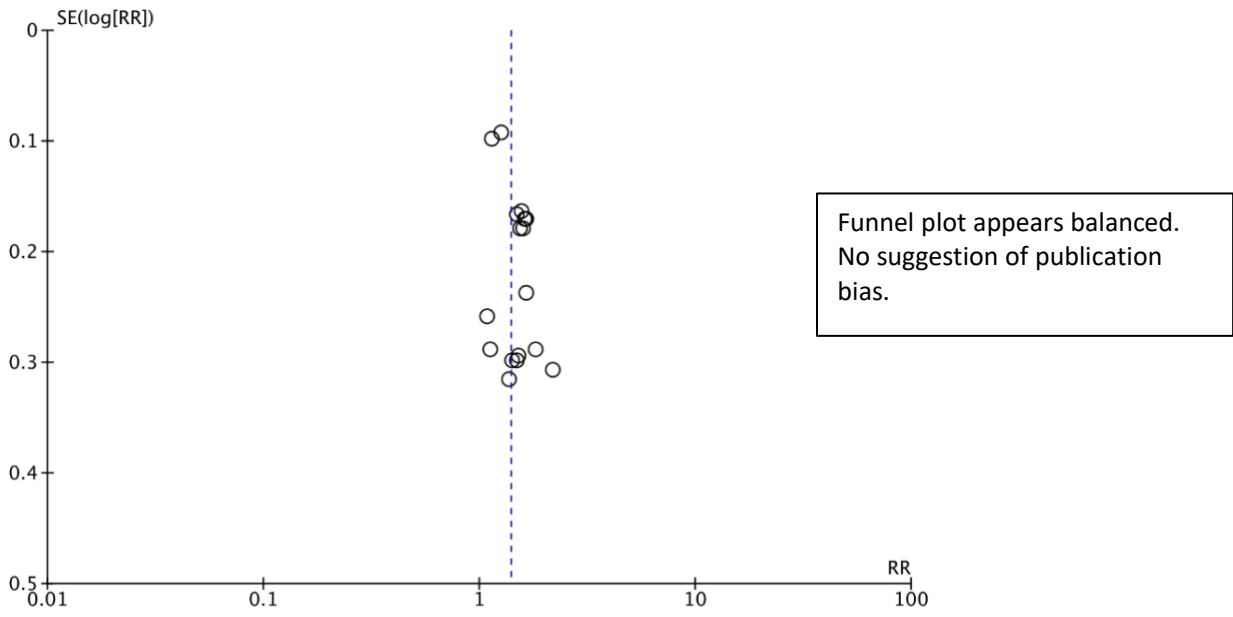

## Quality Assessment

### Cochrane Risk of Bias Tables

The Cochrane Risk of Bias is an assessment tool that addresses seven specific domains: sequence generation, allocation concealment, blinding of participants and personnel, blinding of outcome assessors, incomplete outcome data, selective outcome reporting, and other bias. Due to the subjective nature of the outcomes, we chose to split the 'blinding of participants and personnel' domain and use the 'other bias' domain specifically for blinding of personnel. Each domain was assigned a judgement related to the risk of bias, specifically 'low', 'high' or 'unclear' risk of bias.

### Determining Risk of Bias Median

To generate the meta-analyses that utilized a risk of bias median we assigned a quality score to each risk domain highlighted in the Cochrane Risk of Bias tool. Assignment is outlined as follows: (Low Risk = 0, Unclear Risk = 1, High Risk = 2). We found the sum for each study, determined the median score, and divided studies into two subgroups: 1) less than the median and 2) equal to or greater than the median.

Figure 20.1a Acupuncture Risk of Bias Summary

|             | Random sequence generation (selection bias) | Allocation concealment (selection bias) | Blinding of participants (performance bias) | Blinding of study personnel (performance bias) | Blinding of outcome assessment (detection bias) | Incomplete outcome data (attrition bias) | Selective reporting (reporting bias) |
|-------------|---------------------------------------------|-----------------------------------------|---------------------------------------------|------------------------------------------------|-------------------------------------------------|------------------------------------------|--------------------------------------|
| Garrow 2014 | +                                           | +                                       | +                                           | -                                              | ?                                               | -                                        | ?                                    |
| Lewith 1983 | +                                           | +                                       | -                                           | -                                              | -                                               | -                                        | ?                                    |
| Shin 2018   | +                                           | +                                       | -                                           | -                                              | +                                               | -                                        | ?                                    |

Figure 20.1b Acupuncture Risk of Bias Graph

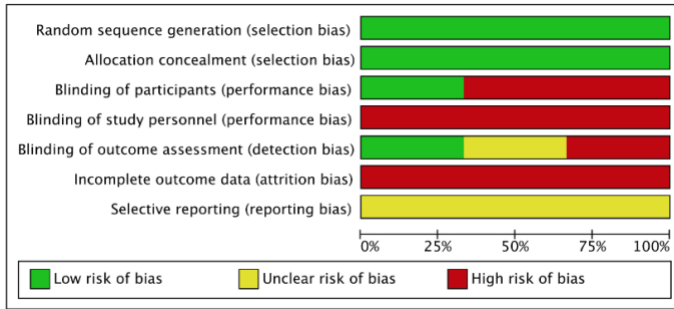

Figure 20.2a Anticonvulsants Risk of Bias Summary

|                           | Random sequence generation (selection bias) | Allocation concealment (selection bias) | Blinding of participants (performance bias) | Blinding of study personnel (performance bias) | Blinding of outcome assessment (detection bias) | Incomplete outcome data (attrition bias) | Selective reporting (reporting bias) |
|---------------------------|---------------------------------------------|-----------------------------------------|---------------------------------------------|------------------------------------------------|-------------------------------------------------|------------------------------------------|--------------------------------------|
| Achar 2010                | ?                                           | ?                                       | ?                                           | ?                                              | ?                                               | ?                                        | ?                                    |
| Arezzo 2008               | ●                                           | ●                                       | ●                                           | ●                                              | ●                                               | ?                                        | ●                                    |
| Baba 2020                 | ●                                           | ●                                       | ●                                           | ●                                              | ●                                               | ●                                        | ?                                    |
| Backonja 1998             | ●                                           | ●                                       | ●                                           | ●                                              | ●                                               | ●                                        | ?                                    |
| Backonja 2011             | ●                                           | ?                                       | ●                                           | ●                                              | ●                                               | ●                                        | ●                                    |
| Beydoun 2006 (1200 mg)    | ●                                           | ?                                       | ?                                           | ?                                              | ?                                               | ?                                        | ?                                    |
| Beydoun 2006 (1800 mg)    | ●                                           | ?                                       | ?                                           | ?                                              | ?                                               | ?                                        | ?                                    |
| Beydoun 2006 (600 mg)     | ●                                           | ?                                       | ?                                           | ?                                              | ?                                               | ?                                        | ?                                    |
| CTR1476G2301              | ?                                           | ?                                       | ●                                           | ●                                              | ●                                               | ?                                        | ?                                    |
| Dogra 2005                | ●                                           | ●                                       | ●                                           | ●                                              | ●                                               | ●                                        | ?                                    |
| Dworkin 2003              | ?                                           | ?                                       | ?                                           | ?                                              | ?                                               | ?                                        | ?                                    |
| Freynhagen 2005 (Fixed)   | ?                                           | ?                                       | ●                                           | ?                                              | ?                                               | ●                                        | ?                                    |
| Freynhagen 2005 (Flexed)  | ?                                           | ?                                       | ●                                           | ?                                              | ?                                               | ●                                        | ?                                    |
| Guan 2011                 | ?                                           | ?                                       | ●                                           | ?                                              | ?                                               | ?                                        | ?                                    |
| Huffman 2015              | ●                                           | ?                                       | ●                                           | ?                                              | ?                                               | ?                                        | ?                                    |
| Lesser 2004 (300 mg)      | ●                                           | ●                                       | ●                                           | ●                                              | ?                                               | ●                                        | ?                                    |
| Lesser 2004 (600 mg)      | ●                                           | ●                                       | ●                                           | ●                                              | ?                                               | ●                                        | ?                                    |
| Lesser 2004 (75 mg)       | ●                                           | ●                                       | ●                                           | ●                                              | ?                                               | ●                                        | ?                                    |
| Liu 2017                  | ●                                           | ●                                       | ●                                           | ●                                              | ●                                               | ●                                        | ●                                    |
| McDonnell 2018            | ●                                           | ●                                       | ?                                           | ?                                              | ?                                               | ●                                        | ●                                    |
| Moon 2010                 | ●                                           | ●                                       | ●                                           | ?                                              | ?                                               | ?                                        | ?                                    |
| Mu 2018                   | ●                                           | ?                                       | ●                                           | ●                                              | ?                                               | ●                                        | ?                                    |
| NCT00394901 2006 (150 mg) | ?                                           | ?                                       | ●                                           | ●                                              | ?                                               | ?                                        | ●                                    |
| NCT00394901 2006 (300 mg) | ?                                           | ?                                       | ●                                           | ●                                              | ?                                               | ?                                        | ●                                    |
| NCT00394901 2006 (600 mg) | ?                                           | ?                                       | ●                                           | ●                                              | ?                                               | ?                                        | ●                                    |

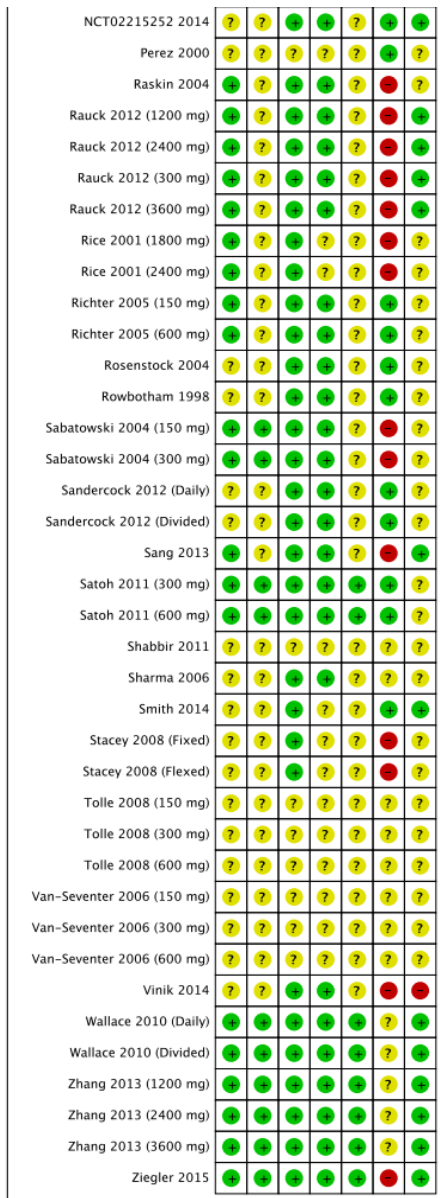

Figure 20.2b Anticonvulsants Risk of Bias Graph

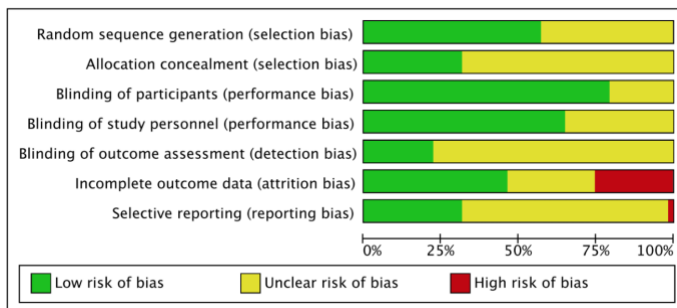

Figure 20.3a Opioids Risk of Bias Summary

|                  | Random sequence generation (selection bias) | Allocation concealment (selection bias) | Blinding of participants (performance bias) | Blinding of study personnel (performance bias) | Blinding of outcome assessment (detection bias) | Incomplete outcome data (attrition bias) | Selective reporting (reporting bias) |
|------------------|---------------------------------------------|-----------------------------------------|---------------------------------------------|------------------------------------------------|-------------------------------------------------|------------------------------------------|--------------------------------------|
| Freeman 2007     | +                                           | ?                                       | +                                           | +                                              | +                                               | +                                        | +                                    |
| Hanna 2008       | ?                                           | +                                       | ?                                           | ?                                              | +                                               | ?                                        | ?                                    |
| Jensen 2006      | +                                           | ?                                       | +                                           | ?                                              | ?                                               | +                                        | ?                                    |
| NCT01124617 2010 | ?                                           | ?                                       | ?                                           | +                                              | +                                               | +                                        | +                                    |
| Simpson 2016     | +                                           | +                                       | ?                                           | ?                                              | +                                               | +                                        | +                                    |
| Zin 2010         | +                                           | +                                       | +                                           | ?                                              | +                                               | +                                        | +                                    |

Figure 20.3b Opioids Risk of Bias Graph

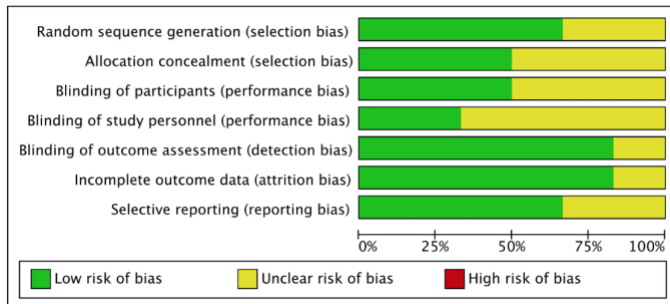



Figure 20.4a Rubefacients Risk of Bias Summary

|                            | Random sequence generation (selection bias) | Allocation concealment (selection bias) | Blinding of participants (performance bias) | Blinding of study personnel (performance bias) | Blinding of outcome assessment (detection bias) | Incomplete outcome data (attrition bias) | Selective reporting (reporting bias) |
|----------------------------|---------------------------------------------|-----------------------------------------|---------------------------------------------|------------------------------------------------|-------------------------------------------------|------------------------------------------|--------------------------------------|
| Backonja 2008              | +                                           | +                                       | +                                           | +                                              | +                                               | +                                        | +                                    |
| Bernstein 1989             | +                                           | +                                       | +                                           | ?                                              | ?                                               | +                                        | +                                    |
| Capsaicin Study Group 1992 | ?                                           | ?                                       | +                                           | ?                                              | ?                                               | +                                        | +                                    |
| Irving 2011                | +                                           | +                                       | +                                           | +                                              | +                                               | +                                        | +                                    |
| Moon 2017 (cream)          | +                                           | ?                                       | +                                           | +                                              | +                                               | +                                        | +                                    |
| Moon 2017a (low dose)      | +                                           | ?                                       | +                                           | +                                              | +                                               | +                                        | +                                    |
| Moon 2017b (high dose)     | +                                           | ?                                       | +                                           | +                                              | +                                               | +                                        | +                                    |
| Simpson 2017               | +                                           | +                                       | +                                           | +                                              | +                                               | +                                        | +                                    |
| Tandan 1992                | ?                                           | ?                                       | ?                                           | ?                                              | ?                                               | +                                        | +                                    |
| Vinik 2015                 | ?                                           | ?                                       | +                                           | +                                              | +                                               | ?                                        | ?                                    |
| Vinik 2015a                | ?                                           | ?                                       | +                                           | +                                              | +                                               | ?                                        | ?                                    |
| Watson 1993                | +                                           | +                                       | +                                           | +                                              | +                                               | +                                        | ?                                    |
| Webster 2010               | +                                           | +                                       | +                                           | +                                              | +                                               | +                                        | +                                    |

Figure 20.4b Rubefacients Risk of Bias Graph

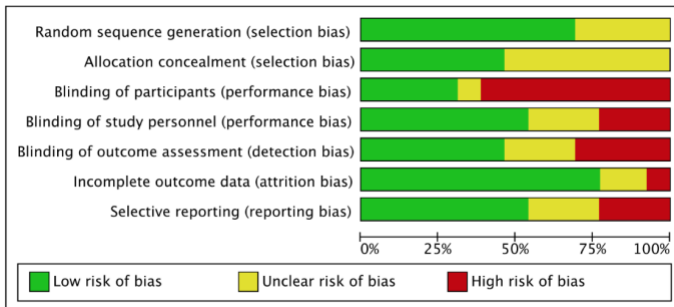

Figure 20.5a SNRIs Risk of Bias Summary

|                 | Random sequence generation (selection bias) | Allocation concealment (selection bias) | Blinding of participants (performance bias) | Blinding of study personnel (performance bias) | Blinding of outcome assessment (detection bias) | Incomplete outcome data (attrition bias) | Selective reporting (reporting bias) |
|-----------------|---------------------------------------------|-----------------------------------------|---------------------------------------------|------------------------------------------------|-------------------------------------------------|------------------------------------------|--------------------------------------|
| Allen 2014      | +                                           | +                                       | +                                           | +                                              | +                                               | -                                        | +                                    |
| Allen 2014a     | +                                           | +                                       | +                                           | +                                              | +                                               | -                                        | +                                    |
| Allen 2014b     | +                                           | +                                       | +                                           | +                                              | +                                               | -                                        | +                                    |
| Allen 2014c     | +                                           | +                                       | +                                           | +                                              | +                                               | -                                        | +                                    |
| Gao 2010        | ?                                           | ?                                       | +                                           | +                                              | ?                                               | -                                        | +                                    |
| Gao 2014        | ?                                           | ?                                       | +                                           | +                                              | ?                                               | -                                        | ?                                    |
| Goldstein 2005  | +                                           | +                                       | +                                           | +                                              | ?                                               | -                                        | ?                                    |
| Goldstein 2005a | +                                           | +                                       | +                                           | +                                              | ?                                               | -                                        | ?                                    |
| Goldstein 2005b | +                                           | +                                       | +                                           | +                                              | ?                                               | -                                        | ?                                    |
| Raskin 2005     | +                                           | +                                       | +                                           | +                                              | ?                                               | -                                        | ?                                    |
| Raskin 2005a    | +                                           | +                                       | +                                           | +                                              | ?                                               | -                                        | ?                                    |
| Rowbotham 2005  | ?                                           | ?                                       | +                                           | +                                              | ?                                               | -                                        | ?                                    |
| Rowbotham 2005a | ?                                           | ?                                       | +                                           | +                                              | ?                                               | -                                        | ?                                    |
| Wernicke 2006   | +                                           | +                                       | +                                           | +                                              | +                                               | -                                        | ?                                    |
| Wernicke 2006a  | +                                           | +                                       | +                                           | +                                              | +                                               | -                                        | ?                                    |
| Yasuda 2011     | +                                           | ?                                       | +                                           | +                                              | ?                                               | -                                        | ?                                    |
| Yasuda 2011a    | +                                           | ?                                       | +                                           | +                                              | ?                                               | -                                        | ?                                    |

Figure 20.5b SNRIs Risk of Bias Graph

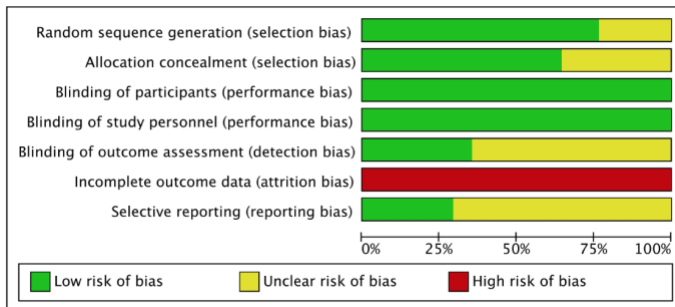

Figure 20.6a TCAs Risk of Bias Summary

|              | Random sequence generation (selection bias) | Allocation concealment (selection bias) | Blinding of participants (performance bias) | Blinding of study personnel (performance bias) | Blinding of outcome assessment (detection bias) | Incomplete outcome data (attrition bias) | Selective reporting (reporting bias) |
|--------------|---------------------------------------------|-----------------------------------------|---------------------------------------------|------------------------------------------------|-------------------------------------------------|------------------------------------------|--------------------------------------|
| Achar 2010   | ?                                           | ?                                       | ●                                           | ●                                              | ●                                               | ●                                        | ?                                    |
| Shabbir 2011 | ?                                           | ?                                       | ?                                           | ?                                              | ?                                               | ?                                        | ?                                    |

Figure 20.6b TCAs Risk of Bias Graph

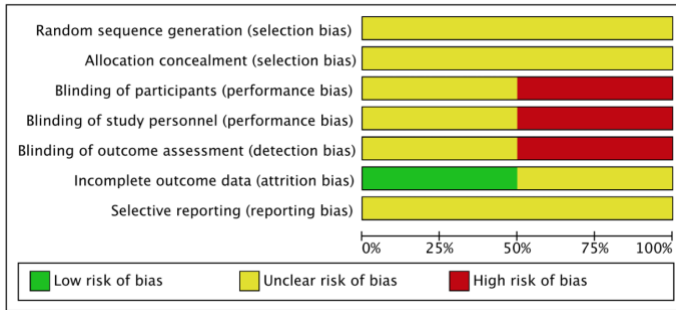

**Table 15: GRADE Evaluation of Evidence Quality**

Interventions ordered alphabetically.

| Intervention           | Number of RCTs | Risk Ratio                  | Reasons for Downgrading                                                                                   | Certainty in Evidence |
|------------------------|----------------|-----------------------------|-----------------------------------------------------------------------------------------------------------|-----------------------|
| <b>Acupuncture</b>     | 3              | RR 1.81 (95% CI 0.55, 5.98) | Risk of Bias (-1)<br>Inconsistency (-1)<br>Imprecision (-1)<br>Publication Bias (-1)                      | Very Low              |
| <b>Anticonvulsants</b> | 40             | RR 1.54 (95% CI 1.45, 1.63) | Publication Bias (-1)                                                                                     | Moderate              |
| <b>Opioids</b>         | 6              | RR 1.37 (95% CI 1.19, 1.57) | Indirect (-1)<br>Publication Bias (-1)                                                                    | Low                   |
| <b>Rubefaciants</b>    | 10             | RR 1.40 (95% CI 1.26, 1.55) | Risk of Bias (-1)<br>Publication Bias (-1)                                                                | Low                   |
| <b>SNRIs</b>           | 8              | RR 1.45 (95% CI 1.33, 1.59) | Publication Bias (-1)                                                                                     | Moderate              |
| <b>TCA</b> s           | 2              | RR 3.00 (95% CI 2.05, 4.38) | Risk of Bias (-1)<br>Inconsistency (-1)<br>Indirectness (-1)<br>Imprecision (-1)<br>Publication Bias (-1) | Very Low              |

CI: Confidence Interval; RCTs: Randomized Controlled Trials; RR: Risk Ratio; SNRIs: Serotonin Norepinephrine Reuptake Inhibitor; TCAs: Tricyclic Antidepressants

**GRADE Criteria for Quality Assessment Sections**

|                        |                                                                                                                                                                                                                                                           |
|------------------------|-----------------------------------------------------------------------------------------------------------------------------------------------------------------------------------------------------------------------------------------------------------|
| Risk of Bias           | Consider allocation concealment, blinding, large losses to follow-up, ITT analysis, stopping early for benefit, etc.<br>Failure to report outcomes/selective reporting of outcomes                                                                        |
| Inconsistency          | Do the estimates of the treatment effect vary widely across studies?<br>Statistical heterogeneity, variability in results<br>Unexplained inconsistency/heterogeneity → decreased quality                                                                  |
| Indirectness           | Differences in population (i.e. patients or animal studies)<br>Differences in intervention (i.e. method or timing of delivery)<br>Differences in outcome measures (i.e. surrogates or length of time)<br>Indirect comparison (i.e. network meta-analyses) |
| Imprecision            | Does confidence interval cross threshold for clinical decision making?<br>Wide confidence intervals (few patients, few events)                                                                                                                            |
| Publication bias       | Small number of trials<br>Only industry funded trials included<br>Funnel plot                                                                                                                                                                             |
| Magnitude of effect    | Large and consistent estimates of the magnitude of a treatment effect<br>Large effect: RR >2 or <0.5; very large effect: RR >5 or <0.2                                                                                                                    |
| Dose response gradient | Presence of this gradient increases the confidence.                                                                                                                                                                                                       |
| Plausible confounding  | If residual confounding would be expected to bias the treatment effect in the opposite direction as observed - increases confidence in results.                                                                                                           |

Reference: Schünemann H, Brożek J, Guyatt G, Oxman A, editors. GRADE handbook for grading quality of evidence and strength of recommendations. Updated October 20 The GRADE Working Group, 20 Available from [guidelinedevelopment.org/handbook](http://guidelinedevelopment.org/handbook).

## Peer Review Comments/Feedback

### Peer Reviewer Information

7 reviewers

- 5 family physicians
- 2 pharmacists

\*NO competing conflicts of interest declared  
(5 reviewers also provided comments on KT tool)

### Familiarity with treating neuropathic pain

All responded that they routinely care for patients with neuropathic pain (estimate 1-2 times per week).

### Strengths of the Systematic Review

Looking at all the different categories of good quality evidence for neuropathic pain treatment. Eliminating poor quality studies to create the recommendation.

Attempted to compare a variety of drug and non-drug treatment options in addition to drugs within the same class. Wide selection of interventions were addressed. Tools and methods used (ex. Cochrane) makes the review credible, high quality and objective. Decision aid visual is helpful and practical. Overall, I found it helpful and detailed.

Neuropathic pain is a difficult problem to manage, especially in the elderly. There is not a lot of large, good quality studies to direct the best management. Therefore, this is an important topic to address, and this review is very valuable to help guide clinicians in practice. The methods were well-described, and it appeared to be free from bias.

Thank you for the opportunity to review this manuscript. I like that it addresses a common condition seen in primary care, with common interventions used in this setting. The use of NNT/NNH in summary tables is helpful from a clinical perspective.

This was reviewed by me along with 10 family medicine residents. The methods used in this review are well justified and thorough. It is clear there has been an attempt to make this review more relevant and specific to primary care practice than previous NP reviews. Writing is clear.

| Weaknesses of the Systematic Review                                                                                                                                                                                                                                                         | Authors' response                                                                                                                                                                                                                   |
|---------------------------------------------------------------------------------------------------------------------------------------------------------------------------------------------------------------------------------------------------------------------------------------------|-------------------------------------------------------------------------------------------------------------------------------------------------------------------------------------------------------------------------------------|
| Although it is inevitable, by combining all anticonvulsants into the same category even though pregabalin and gabapentin are the most commonly used ones decreases the power of the recommendations in that category.                                                                       | Test for subgroup differences was not statistically significant.                                                                                                                                                                    |
| Did not address data (or perhaps lack thereof) for other non-drug interventions such as physiotherapy/massage (unless it was considered "exercise?"), compounded topicals (especially those containing gabapentin). Likely very limited information out there but would be helpful to know. | The number of included interventions was limited to those most commonly used in primary care settings. Topical lidocaine/exercise (including physiotherapy) were included, however no RCTs with responder analyses were identified. |

|                                                                                                                                                                                                                                                                |                                                                                                                                                                                                                                                                                                                                                                                               |
|----------------------------------------------------------------------------------------------------------------------------------------------------------------------------------------------------------------------------------------------------------------|-----------------------------------------------------------------------------------------------------------------------------------------------------------------------------------------------------------------------------------------------------------------------------------------------------------------------------------------------------------------------------------------------|
|                                                                                                                                                                                                                                                                | These potential topics will be forwarded to our chronic pain guideline committee.                                                                                                                                                                                                                                                                                                             |
| I did not find any concerning areas of weakness other than the limitations identified by the authors.                                                                                                                                                          |                                                                                                                                                                                                                                                                                                                                                                                               |
| Para 1: as a reader I felt several phrases were unclear including "symptom-based prevalence" and "both persistent and intermittent".                                                                                                                           | Manuscript revised.                                                                                                                                                                                                                                                                                                                                                                           |
| Line 8, page 1: Please define "neuropathic pain conditions", this was not defined in the prior paragraph?                                                                                                                                                      | Manuscript revised.                                                                                                                                                                                                                                                                                                                                                                           |
| Line 23, page 1: "These three conditions were chosen as they are commonly seen and treated in primary care" please provide a reference.                                                                                                                        | Manuscript revised.                                                                                                                                                                                                                                                                                                                                                                           |
| Overall, I would suggest more background about why you combined different interventions into one category. This is addressed as a limitation further on in the manuscript but is inadequately justified initially.                                             | We initially chose to report medications as a class, however tested for subgroup differences to determine if individual agents provided improved efficacy compared to others. We tested for differences for both anticonvulsants and SNRIs, however found no difference between agents. We added the most commonly studied agents (pregabalin/gabapentin and duloxetine) for further clarity. |
| Furthermore, it is unclear how this manuscript builds on existing literature in the 'introduction', please expand on this.                                                                                                                                     | To our knowledge, this is the first systematic review in multiple interventions for neuropathic pain, that focuses solely on responder outcomes. One reason we chose to focus on responders was to inform our clinical decision aid.                                                                                                                                                          |
| Methods, page 1: Please describe specific exclusion criteria in addition to inclusion criteria.                                                                                                                                                                | Manuscript revised.                                                                                                                                                                                                                                                                                                                                                                           |
| Line 40: please provide a reference for selection of primary outcome. It is unclear why "30% reduction" was chosen. If this was not identified from a reference but from team consensus about what would be a clinically important outcome, please state this. | Added IMMPACT reference, referring to the clinical importance of treatment outcomes in chronic pain clinical trials.                                                                                                                                                                                                                                                                          |
| Line 65: I am surprised by the use of fixed effects models throughout, in this situation where interventions and populations are different between studies. There may be a very appropriate reason for this, that is to me not clearly described in            | We have added a reference to the Cochrane handbook that refers to our choice for fixed/random effects. Secondly, for TCAs, we have presented both fixed and random effects to                                                                                                                                                                                                                 |

|                                                                                                                                                                                                                                                                                                                                                                                                                                          |                                                                                                                                                                                            |
|------------------------------------------------------------------------------------------------------------------------------------------------------------------------------------------------------------------------------------------------------------------------------------------------------------------------------------------------------------------------------------------------------------------------------------------|--------------------------------------------------------------------------------------------------------------------------------------------------------------------------------------------|
| the manuscript. I would suggest reviewing this decision and its description with a statistician, if you have not already done so.                                                                                                                                                                                                                                                                                                        | highlight the uncertainty of the data. Added reference to Cochrane handbook (line 68).                                                                                                     |
| "Efficacy" and "effectiveness" are used interchangeably throughout the manuscript; please revise.                                                                                                                                                                                                                                                                                                                                        | Manuscript revised.                                                                                                                                                                        |
| I think it is worth saying more about heterogeneity, both statistically and clinically. One of the core 'critiques' that could be applied to this manuscript is that the population, intervention, comparators are all are heterogenous. Therefore, this should be a central aspect of the discussion.                                                                                                                                   | We did address heterogeneity throughout the results, quality assessment and discussion. With the exception of TCAs and acupuncture, the other interventions had fairly homogenous results. |
| <b>Comments, considerations or changes</b>                                                                                                                                                                                                                                                                                                                                                                                               |                                                                                                                                                                                            |
| As stated above, would be nice to see inclusion of more non-systemic options such as other topicals (ex. compounded topicals containing gabapentin) and more non-drug modalities such as stress reduction, massage/physiotherapy which would be helpful in geriatrics and other patient populations who cannot take oral meds. Clarification for what was classified as "exercise"...ex. what type of exercise was included...all types? | Addressed. See above.                                                                                                                                                                      |
| Overall solid paper. A few suggestions:                                                                                                                                                                                                                                                                                                                                                                                                  |                                                                                                                                                                                            |
| Introduction                                                                                                                                                                                                                                                                                                                                                                                                                             |                                                                                                                                                                                            |
| <ul style="list-style-type: none"> <li>• 1st paragraph could be simplified – line 2: by removing "symptom based"; line 3 by removing "is typically both persistent and paroxysmal in nature"</li> </ul>                                                                                                                                                                                                                                  | Addressed. See above.                                                                                                                                                                      |
| <ul style="list-style-type: none"> <li>• Objectives with PICOs well explained</li> </ul>                                                                                                                                                                                                                                                                                                                                                 |                                                                                                                                                                                            |
| Methods – sensitivity vs subgroup analysis                                                                                                                                                                                                                                                                                                                                                                                               |                                                                                                                                                                                            |
| <ul style="list-style-type: none"> <li>• Line 23 – remove "most" or provide a reference to "most commonly seen in primary care"</li> </ul>                                                                                                                                                                                                                                                                                               | Addressed. See above.                                                                                                                                                                      |
| <ul style="list-style-type: none"> <li>• Line 24 – what was the rational for choosing these interventions?</li> </ul>                                                                                                                                                                                                                                                                                                                    | Addressed. See above.                                                                                                                                                                      |
| <ul style="list-style-type: none"> <li>• Search strategy – specify whether only publications in English were considered and provide the clinical trial registries that were used</li> </ul>                                                                                                                                                                                                                                              | Added that only English publications were included. References 12 and 13 refer to the two clinical trial registries that were searched.                                                    |
| <ul style="list-style-type: none"> <li>• Line 43 – Appendix XX needs to be specified</li> </ul>                                                                                                                                                                                                                                                                                                                                          | Manuscript revised.                                                                                                                                                                        |
| <ul style="list-style-type: none"> <li>• Line 69 – Please add something like "If RCTs reported outcomes at multiple time-points, we chose the data that came from ..."</li> </ul>                                                                                                                                                                                                                                                        | See line 79                                                                                                                                                                                |
| <ul style="list-style-type: none"> <li>• Random vs fixed effect analyses –whether to choose one or the other was quite arbitrary. For the next review, picking one or</li> </ul>                                                                                                                                                                                                                                                         | Addressed. See above.                                                                                                                                                                      |

|                                                                                                                                                                                                                                                                                                  |                                                                                                                                                                                                                                                                                                                                                         |
|--------------------------------------------------------------------------------------------------------------------------------------------------------------------------------------------------------------------------------------------------------------------------------------------------|---------------------------------------------------------------------------------------------------------------------------------------------------------------------------------------------------------------------------------------------------------------------------------------------------------------------------------------------------------|
| the other with more objective criteria might be better. Given that studies on neuropathic pain tend to have different protocols / study populations etc., random effect analysis might be the most appropriate to report all results. (see later comment on that same topic)                     |                                                                                                                                                                                                                                                                                                                                                         |
| <ul style="list-style-type: none"> <li>Line 75 – consider removing "to explore potential sources of heterogeneity" as I<sup>2</sup> is not what is being discussed in that paragraph. I would just leave at "we determined a priori to analyze a series of subgroups. These were...."</li> </ul> | We felt it was important to specify that we were exploring, through subgroup analyses, only some potential sources of heterogeneity. This list was not exhaustive as we do not know all causes of heterogeneity. This relates to I <sup>2</sup> , as it is the statistical test that quantifies the amount of heterogeneity present, not due to chance. |
| Results                                                                                                                                                                                                                                                                                          |                                                                                                                                                                                                                                                                                                                                                         |
| <ul style="list-style-type: none"> <li>Results are well reported; however, the paper would benefit from more consistency between sections</li> </ul>                                                                                                                                             | Manuscript revised.                                                                                                                                                                                                                                                                                                                                     |
| <ul style="list-style-type: none"> <li>For example, only the TCA and acupuncture sections comment on study quality and heterogeneity. These should be reported for all studied interventions.</li> </ul>                                                                                         | We did report on quality throughout all interventions, when we were referring to our subgroup analyses. Overall quality and heterogeneity are discussed in the Quality Assessment section of results.                                                                                                                                                   |
| <ul style="list-style-type: none"> <li>I would suggest that all sections report on % studies with high risk of bias and I<sup>2</sup></li> </ul>                                                                                                                                                 | We are unable to report on the proportion of studies at high risk of bias, as we reported only a median split of the risk of bias (those falling below or above the median). We have added the specific I <sup>2</sup> for each intervention in the Quality Assessment section.                                                                         |
| <ul style="list-style-type: none"> <li>Line 118-122: was the benefit still there in larger trials / trials with less risk of bias? (if anything, I am more interested to know that instead of knowing the benefit of herpetic neuropathy vs diabetic neuropathy)</li> </ul>                      | Manuscript revised.                                                                                                                                                                                                                                                                                                                                     |
| <ul style="list-style-type: none"> <li>Line 106-108: instead of saying "the majority", a "small proportion", give the actual numbers</li> </ul>                                                                                                                                                  | Manuscript revised.                                                                                                                                                                                                                                                                                                                                     |
| <ul style="list-style-type: none"> <li>Line 187: what do "small" studies refer to (no definition)?</li> </ul>                                                                                                                                                                                    | This is addressed on line 77.                                                                                                                                                                                                                                                                                                                           |
| <ul style="list-style-type: none"> <li>TCA section</li> </ul>                                                                                                                                                                                                                                    |                                                                                                                                                                                                                                                                                                                                                         |
| <ul style="list-style-type: none"> <li>A fixed effect model should be used for consistency. It was used for the rest of the paper with no clear justification to use a random effects model.</li> </ul>                                                                                          | See line 65-69 for rationale of when to use fixed or random effects. We will present both models, however, for TCAs, because of the inconsistencies with the data.                                                                                                                                                                                      |



|                                                                                                                                                                                                                                                                                                                                                                                                                                                                                                                                                                                                                                                                                                                                                     |                                                                                                                                                                                                                     |
|-----------------------------------------------------------------------------------------------------------------------------------------------------------------------------------------------------------------------------------------------------------------------------------------------------------------------------------------------------------------------------------------------------------------------------------------------------------------------------------------------------------------------------------------------------------------------------------------------------------------------------------------------------------------------------------------------------------------------------------------------------|---------------------------------------------------------------------------------------------------------------------------------------------------------------------------------------------------------------------|
| o If the data from the trial is of too low quality to be believable (it seems like it), another option would be not to do a meta-analysis for this section                                                                                                                                                                                                                                                                                                                                                                                                                                                                                                                                                                                          | Manuscript revised to include both fixed and random effects models.                                                                                                                                                 |
| Quality assessment                                                                                                                                                                                                                                                                                                                                                                                                                                                                                                                                                                                                                                                                                                                                  |                                                                                                                                                                                                                     |
| <ul style="list-style-type: none"> <li>• Would it be possible to add 1-2 sentences in the main text to justify the quality assessments? Text such as lines 187-190 and 197 might be better suited for this section (the results section should still report on % studies at high risk of bias and heterogeneity in a more standardized fashion)</li> </ul>                                                                                                                                                                                                                                                                                                                                                                                          | Addressed in methods section of manuscript.                                                                                                                                                                         |
| Discussion                                                                                                                                                                                                                                                                                                                                                                                                                                                                                                                                                                                                                                                                                                                                          |                                                                                                                                                                                                                     |
| <ul style="list-style-type: none"> <li>• Lines 228-229. Consider removing topiramate and oxcarbazepine are typically not prescribed for neuropathic pain (especially not in primary care)</li> </ul>                                                                                                                                                                                                                                                                                                                                                                                                                                                                                                                                                | We decided to include topiramate and oxcarbazepine as they are still list as treatment options for neuropathic pain. Manuscript revised to highlight the absence of carbamazepine responder data in the literature. |
| <ul style="list-style-type: none"> <li>• Consider including the typical placebo response and general NNT (5-10)</li> </ul>                                                                                                                                                                                                                                                                                                                                                                                                                                                                                                                                                                                                                          | Refer to PEER Simplified Decision Aid for Neuropathic Pain                                                                                                                                                          |
| <ul style="list-style-type: none"> <li>• Consider simplifying paragraph on TCA (lines 237-248). Somewhat convoluted. The end point is that there is no good data to know with certainty whether TCAs are useful – this could be told in more simple terms</li> </ul>                                                                                                                                                                                                                                                                                                                                                                                                                                                                                | Manuscript revised.                                                                                                                                                                                                 |
| <ul style="list-style-type: none"> <li>• The general consensus is that opioids are not particularly effective in chronic pain. Why is it that they seem to work (with some limitations) for neuropathic pain?</li> </ul>                                                                                                                                                                                                                                                                                                                                                                                                                                                                                                                            | Requires further study to answer.                                                                                                                                                                                   |
| <ul style="list-style-type: none"> <li>• It would also be interesting to know whether tramadol is any different than the other opioids as it is currently being marketed as the opioid to use for neuropathic pain</li> </ul>                                                                                                                                                                                                                                                                                                                                                                                                                                                                                                                       | Manuscript revised.                                                                                                                                                                                                 |
| Strengths and limitations                                                                                                                                                                                                                                                                                                                                                                                                                                                                                                                                                                                                                                                                                                                           |                                                                                                                                                                                                                     |
| <ul style="list-style-type: none"> <li>• Lines 273-274. First part of the sentence is a repeat of the previous sentence</li> </ul>                                                                                                                                                                                                                                                                                                                                                                                                                                                                                                                                                                                                                  | Manuscript revised.                                                                                                                                                                                                 |
| I find it interesting that there appears to be a delay to the efficacy of the different treatments (often 4-12 weeks into treatment). Given the NNH for some of the treatments and the side effects reported, it would seem to me that these ADR's would often be an issue PRIOR to the onset of benefit. It would be interesting to comment on this and how it might determine how long a patient should try one of these interventions before considering it a failure or non-response. I also find the high placebo rate in all the studies to be very interesting and might be worth commenting on as well. I think this is very well-done and provides valuable information to help make decisions with the patient to manage neuropathic pain | SNRIs – no studies <4 weeks<br><br>Not necessarily a delay – no data to confirm. (most in 4-12-week range)<br>We have added further detail on this in the discussion section.                                       |

|                                                                                                                                                                                                                                                                                                                                                                                                                                                                                                                                                                                                                                                                                                                                                                                                                                                                                                                                                                                                                                                                                                                                                                                                                                                                                                                                                                                                                                                                                                                                                                                                                                                                                                                                                                                                                                                                        |                                                                                                                                                                                                                                                                                                                                                                    |
|------------------------------------------------------------------------------------------------------------------------------------------------------------------------------------------------------------------------------------------------------------------------------------------------------------------------------------------------------------------------------------------------------------------------------------------------------------------------------------------------------------------------------------------------------------------------------------------------------------------------------------------------------------------------------------------------------------------------------------------------------------------------------------------------------------------------------------------------------------------------------------------------------------------------------------------------------------------------------------------------------------------------------------------------------------------------------------------------------------------------------------------------------------------------------------------------------------------------------------------------------------------------------------------------------------------------------------------------------------------------------------------------------------------------------------------------------------------------------------------------------------------------------------------------------------------------------------------------------------------------------------------------------------------------------------------------------------------------------------------------------------------------------------------------------------------------------------------------------------------------|--------------------------------------------------------------------------------------------------------------------------------------------------------------------------------------------------------------------------------------------------------------------------------------------------------------------------------------------------------------------|
| <p>There appears to be significant emphasis on responder analysis and its advantages over other types of outcome analysis. Yet the meaning of "30% reduction in pain", especially when various measures of pain are included, is not well described and it is not entirely convincing that this is much more meaningful than other types of outcome measures. It is also not clear how much literature has been lost by restricting the analysis to this outcome. It would be good to have this discussed possibly in limitations. It is remarkable that TCA's in this analysis have lost their top rank in the hierarchy where they were located in some previous reviews and appreciate your discussion about this. In the end then, since this is meant to be more relevant to primary care than other reviews, is it not important to mention that none of these trials are addressing most of the patients we are managing, who have been on their treatments or had their pain for much longer than 3 months? Is it not semantics that we are looking for the most trustworthy evidence to address a problem that we are most often not treating (ie people who have been on less than 3 months of treatment?) It would be good to hear this mentioned at least. Also, it may be worth a comment about how consistent these findings are with other reviews that use different outcomes, for which my impression is that the differences in NNT within your review and compared to other reviews are really pretty small, and the hierarchy does not have large spread. Finally, the absence of cannabinoids is understood but awkward, especially since they have made it high onto some guidelines. This will make the upcoming guidelines from this review all the more anticipated, which we assume will include the work you have done on cannabinoids.</p> | <p>Added a reference on choice of outcome for patients with chronic pain.</p> <p>Added in limitations, that a proportion of studies were missed that do not have responder data.</p> <p>TCA's- other high quality systematic reviews have addressed the limitations of the body of evidence around TCAs</p> <p>Cannabinoids- forwarded to guideline committee.</p> |
|                                                                                                                                                                                                                                                                                                                                                                                                                                                                                                                                                                                                                                                                                                                                                                                                                                                                                                                                                                                                                                                                                                                                                                                                                                                                                                                                                                                                                                                                                                                                                                                                                                                                                                                                                                                                                                                                        |                                                                                                                                                                                                                                                                                                                                                                    |
| <p>I would like to congratulate the authors on such a wonderful work on preparing this manuscript. I read it with great interest and have a few small comments as below:</p>                                                                                                                                                                                                                                                                                                                                                                                                                                                                                                                                                                                                                                                                                                                                                                                                                                                                                                                                                                                                                                                                                                                                                                                                                                                                                                                                                                                                                                                                                                                                                                                                                                                                                           |                                                                                                                                                                                                                                                                                                                                                                    |
| <p>Line 10,11-- what is the purpose of mentioning these previous systematic reviews? It would be nice to review any existing systematic review on the topic and why the current systematic review is different?</p>                                                                                                                                                                                                                                                                                                                                                                                                                                                                                                                                                                                                                                                                                                                                                                                                                                                                                                                                                                                                                                                                                                                                                                                                                                                                                                                                                                                                                                                                                                                                                                                                                                                    | <p>See above.</p>                                                                                                                                                                                                                                                                                                                                                  |
| <p>Line 36-- grey literature usually addresses other websites not Cochrane library or clinical trial registry.</p>                                                                                                                                                                                                                                                                                                                                                                                                                                                                                                                                                                                                                                                                                                                                                                                                                                                                                                                                                                                                                                                                                                                                                                                                                                                                                                                                                                                                                                                                                                                                                                                                                                                                                                                                                     | <p>While we agree that a grey literature search can include a variety of websites, we felt that searching Cochrane and clinical trial registries were adequate to address our questions.</p>                                                                                                                                                                       |
| <p>Line 42-43-- "When multiple responder outcome data was reported, we utilized a hierarchy to prioritize outcomes" this sentence is confusing. Does this mean the time interval that was different for each drug was prioritized?</p>                                                                                                                                                                                                                                                                                                                                                                                                                                                                                                                                                                                                                                                                                                                                                                                                                                                                                                                                                                                                                                                                                                                                                                                                                                                                                                                                                                                                                                                                                                                                                                                                                                 | <p>This refers to studies that report multiple responder outcomes. For example, if both 30% and 50% reductions in pain were reported, we chose to prioritize a 30% reduction.</p>                                                                                                                                                                                  |

|                                                                                                                                                                                                                                                                                                                                                                                                                                                                                                                                                                                                           |                                                                                                                                                                        |
|-----------------------------------------------------------------------------------------------------------------------------------------------------------------------------------------------------------------------------------------------------------------------------------------------------------------------------------------------------------------------------------------------------------------------------------------------------------------------------------------------------------------------------------------------------------------------------------------------------------|------------------------------------------------------------------------------------------------------------------------------------------------------------------------|
| Line 67-68—“If both the effect estimates and confidence intervals were reasonably similar between fixed and random effect analyses, we concluded that it was unlikely that <i>small studies were disproportionately influencing the result and chose fixed effects for the primary analysis</i> ”. ???                                                                                                                                                                                                                                                                                                    | Addressed above (added a reference to the Cochrane handbook).                                                                                                          |
| This sentence does not make sense. The size of the study is not the only factor affecting the fixed or random effect model. Perhaps delete it or provide more explanation                                                                                                                                                                                                                                                                                                                                                                                                                                 | Added a reference to the Cochrane handbook.                                                                                                                            |
| Line 167-- what type of opioids? Please provide some example                                                                                                                                                                                                                                                                                                                                                                                                                                                                                                                                              | Manuscript revised.                                                                                                                                                    |
| Line 201-- should this be exercise or lidocaine at the tile?                                                                                                                                                                                                                                                                                                                                                                                                                                                                                                                                              | Correct the way it is.                                                                                                                                                 |
| Line 211-214-- “Heterogeneity may be due in part to the lower quality of trials, the inclusion of a number of neuropathic pain types or different patient populations, and variance in the delivery of the intervention (e.g., acupuncture, electroacupuncture and auricular acupuncture)”<br><br>The subgroup analysis explains the heterogeneity. It is better here to use those subgroup analyses to explain the heterogeneity rather hypothesizing it.                                                                                                                                                | Heterogeneity may also be due to other things, not only those that were examined in subgroup analyses.                                                                 |
| <b>Additional comments:</b>                                                                                                                                                                                                                                                                                                                                                                                                                                                                                                                                                                               |                                                                                                                                                                        |
| Are any of these studies conducted in primary care setting? As the systematic review claims that these results are appropriate for primary care providers, it is worth mentioning if they have been done in the primacy care setting.                                                                                                                                                                                                                                                                                                                                                                     | A very small percentage (1%) of studies were clearly conducted in primary care, however 66% of trials did not clearly state the setting where the study was conducted. |
| Defining outcomes of interest--“While only a proportion of RCTs report a responder analysis, focusing on dichotomous outcomes allowed us to combine trials utilizing different pain measures, by using counts of responders, without losing clinical meaning. Changes on a pain scale, or their combination into Standard Mean Differences (SMD), are challenging to interpret and do not translate easily in a patient conversation”<br>I worry taking this approach introduce “selective outcome reporting bias”. One approach was to use the SMD and translate back the Estimate effect for clinician. | We did report the limitations of only reporting responder analyses within the discussion section.                                                                      |

## References

### Acupuncture

1. Garrow AP, Xing M, Vere J, Verrall B, Wang L, Jude EB. Role of acupuncture in the management of diabetic painful neuropathy (DPN): a pilot RCT. 2014;32(3):242-249.
2. Lewith GT, Field J, Machin D. Acupuncture compared with placebo in post-herpetic pain. 1983;17(4):361-368.
3. Shin KM, Lee S, Lee EY, et al. Electroacupuncture for painful diabetic peripheral neuropathy: a multicenter, randomized, assessor-blinded, controlled trial. 2018;41(10):e141-e142.

### Anticonvulsants

4. Multicenter, double-blind, randomized, placebo-control, parallel study to evaluate the safety and efficacy of oxcarbazepine in patients with neuropathic pain due to diabetic neuropathy. 2003.
5. Achar A, Chatterjee G, Ray TG, Naskar B. Comparative study of clinical efficacy with amitriptyline, pregabalin, and amitriptyline plus pregabalin combination in postherpetic neuralgia. 2010;76(1):63-65.
6. Arezzo JC, Rosenstock J, Lamoreaux L, Pauer L. Efficacy and safety of pregabalin 600 mg/d for treating painful diabetic peripheral neuropathy: a double-blind placebo-controlled trial. 2008;8:33.
7. Baba M, Kuroha M, Ohwada S, Murayama E, Matsui N. Results of Mirogabalin Treatment for Diabetic Peripheral Neuropathic Pain in Asian Subjects: A Phase 2, Double-Blind, Randomized, Placebo-Controlled, Study. *Pain and therapy*. 2020;9(1):261-278.
8. Backonja M, Beydoun A, Edwards KR, et al. Gabapentin for the symptomatic treatment of painful neuropathy in patients with diabetes mellitus: a randomized controlled trial. 1998;280(21):1831-1836.
9. Backonja MM, Canafax DM, Cundy KC. Efficacy of gabapentin enacarbil vs placebo in patients with postherpetic neuralgia and a pharmacokinetic comparison with oral gabapentin. 2011;12(7):1098-1108.
10. Beydoun A, Shaibani A, Hopwood M, Wan Y. Oxcarbazepine in painful diabetic neuropathy: results of a dose-ranging study. 2006;113(6):395-404.
11. Dogra S, Beydoun S, Mazzola J, Hopwood M, Wan Y. Oxcarbazepine in painful diabetic neuropathy: a randomized, placebo-controlled study. 2005;9(5):543-554.
12. Dworkin RH, Corbin AE, Young JP, et al. Pregabalin for the treatment of postherpetic neuralgia: a randomized, placebo-controlled trial. 2003;60(8):1274-1283.
13. Freynhagen R, Strojek K, Griesing T, Whalen E, Balkenohl M. Efficacy of pregabalin in neuropathic pain evaluated in a 12-week, randomised, double-blind, multicentre, placebo-controlled trial of flexible- and fixed-dose regimens. 2005;115(3):254-263.

14. Guan Y, Ding X, Cheng Y, et al. Efficacy of pregabalin for peripheral neuropathic pain: results of an 8-week, flexible-dose, double-blind, placebo-controlled study conducted in China. 2011;33(2):159-166.
15. Huffman C, Stacey BR, Tuchman M, et al. Efficacy and Safety of Pregabalin in the Treatment of Patients With Painful Diabetic Peripheral Neuropathy and Pain on Walking. 2015;31(11):946-958.
16. Lesser H, Sharma U, LaMoreaux L, Poole RM. Pregabalin relieves symptoms of painful diabetic neuropathy: a randomized controlled trial. 2004;63(11):2104-2110.
17. Liu Q, Chen H, Xi L, et al. A Randomized, Double-blind, Placebo-controlled Trial to Evaluate the Efficacy and Safety of Pregabalin for Postherpetic Neuralgia in a Population of Chinese Patients. 2017;17(1):62-69.
18. McDonnell A, Collins S, Ali Z, et al. Efficacy of the Nav1.7 blocker PF-05089771 in a randomised, placebo-controlled, double-blind clinical study in subjects with painful diabetic peripheral neuropathy. 2018;159(8):1465-1476.
19. Moon DE, Lee DI, Lee SC, et al. Efficacy and tolerability of pregabalin using a flexible, optimized dose schedule in Korean patients with peripheral neuropathic pain: a 10-week, randomized, double-blind, placebo-controlled, multicenter study. 2010;32(14):2370-2385.
20. Mu Y, Liu X, Li Q, et al. Efficacy and safety of pregabalin for painful diabetic peripheral neuropathy in a population of Chinese patients: a randomized placebo-controlled trial. 2018;10(3):256-265.
21. Nct. A 13-Week, Randomized, Double-Blind, Multicenter, Placebo-Controlled Study Of Pregabalin For Postherpetic Neuralgia. 2006.
22. Nct. A Study In Patients With Neuropathic Pain From Diabetic Peripheral Neuropathy (DPN). 2008.
23. Nct. A Clinical Trial To Evaluate PF-05089771 On Its Own And As An Add-On Therapy To Pregabalin (Lyrica) For The Treatment Of Pain Due To Diabetic Peripheral Neuropathy (DPN). 2014.
24. Perez HET, Sanchez GF. Gabapentin therapy for diabetic neuropathic pain [12]. *American Journal of Medicine*. 2000;108(8):689.
25. Raskin P, Donofrio PD, Rosenthal NR, et al. Topiramate vs placebo in painful diabetic neuropathy: analgesic and metabolic effects. 2004;63(5):865-873.
26. Rice AS, Maton S. Gabapentin in postherpetic neuralgia: a randomised, double blind, placebo controlled study. 2001;94(2):215-224.
27. Richter RW, Portenoy R, Sharma U, Lamoreaux L, Bockbrader H, Knapp LE. Relief of painful diabetic peripheral neuropathy with pregabalin: a randomized, placebo-controlled trial. 2005;6(4):253-260.
28. Rosenstock J, Tuchman M, LaMoreaux L, Sharma U. Pregabalin for the treatment of painful diabetic peripheral neuropathy: a double-blind, placebo-controlled trial. 2004;110(3):628-638.
29. Rowbotham M, Harden N, Stacey B, Bernstein P, Magnus-Miller L. Gabapentin for the treatment of postherpetic neuralgia: a randomized controlled trial. 1998;280(21):1837-1842.

30. Sabatowski R, Gálvez R, Cherry DA, et al. Pregabalin reduces pain and improves sleep and mood disturbances in patients with post-herpetic neuralgia: results of a randomised, placebo-controlled clinical trial. 2004;109(1-2):26-35.
31. Sandercock D, Cramer M, Biton V, Cowles VE. A gastroretentive gabapentin formulation for the treatment of painful diabetic peripheral neuropathy: efficacy and tolerability in a double-blind, randomized, controlled clinical trial. 2012;97(3):438-445.
32. Sang CN, Sathyanarayana R, Sweeney M. Gastroretentive gabapentin (G-GR) formulation reduces intensity of pain associated with postherpetic neuralgia (PHN). 2013;29(4):281-288.
33. Satoh J, Yagihashi S, Baba M, et al. Efficacy and safety of pregabalin for treating neuropathic pain associated with diabetic peripheral neuropathy: a 14 week, randomized, double-blind, placebo-controlled trial. 2011;28(1):109-116.
34. Shabbir B, Shafi F, Mahboob F. Amitriptyline vs pregabalin in painful diabetic neuropathy a randomised placebo-based study. 2011;5(4):745-747.
35. Sharma U, Arezzo J, Pauer L, LaMoreaux L. Pregabalin efficaciously treats painful diabetic peripheral neuropathy (DPN) without affecting nerve conduction: a double-blind, placebo-controlled trial. 2006;13(Suppl 2):224-225, Abstract no: P2214.
36. Smith T, DiBernardo A, Shi Y, Todd MJ, Brashear HR, Ford LM. Efficacy and safety of carisbamate in patients with diabetic neuropathy or postherpetic neuralgia: results from 3 randomized, double-blind placebo-controlled trials. 2014;14(4):332-342.
37. Stacey BR, Barrett JA, Whalen E, Phillips KF, Rowbotham MC. Pregabalin for postherpetic neuralgia: placebo-controlled trial of fixed and flexible dosing regimens on allodynia and time to onset of pain relief. 2008;9(11):1006-1017.
38. Tölle T, Freynhagen R, Versavel M, Trostmann U, Young JP. Pregabalin for relief of neuropathic pain associated with diabetic neuropathy: a randomized, double-blind study. 2008;12(2):203-213.
39. van Seventer R, Feister HA, Young JP, Stoker M, Versavel M, Rigaudy L. Efficacy and tolerability of twice-daily pregabalin for treating pain and related sleep interference in postherpetic neuralgia: a 13-week, randomized trial. 2006;22(2):375-384.
40. Vinik A, Rosenstock J, Sharma U, Feins K, Hsu C, Merante D. Efficacy and safety of mirogabalin (DS-5565) for the treatment of diabetic peripheral neuropathic pain: a randomized, double-blind, placebo- and active comparator-controlled, adaptive proof-of-concept phase 2 study. 2014;37(12):3253-3261.
41. Wallace MS, Irving G, Cowles VE. Gabapentin extended-release tablets for the treatment of patients with postherpetic neuralgia: a randomized, double-blind, placebo-controlled, multicentre study. 2010;30(11):765-776.
42. Zhang L, Rainka M, Freeman R, et al. A randomized, double-blind, placebo-controlled trial to assess the efficacy and safety of gabapentin enacarbil in subjects with neuropathic pain associated with postherpetic neuralgia (PXM110748). 2013;14(6):590-603.
43. Ziegler D, Duan WR, An G, Thomas JW, Nothaft W. A randomized double-blind, placebo-, and active-controlled study of T-type calcium channel blocker ABT-639 in patients with diabetic peripheral neuropathic pain. 2015;156(10):2013-2020.

## Opioids

44. Freeman R, Raskin P, Hewitt DJ, et al. Randomized study of tramadol/acetaminophen versus placebo in painful diabetic peripheral neuropathy. 2007;23(1):147-161.
45. Hanna M, O'Brien C, Wilson MC. Prolonged-release oxycodone enhances the effects of existing gabapentin therapy in painful diabetic neuropathy patients. 2008;12(6):804-813.
46. Jensen MP, Friedman M, Bonzo D, Richards P. The validity of the neuropathic pain scale for assessing diabetic neuropathic pain in a clinical trial. 2006;22(1):97-103.
47. Nct. A Phase 2 Study of Tapentadol Extended-Release (JNS024ER) in Japanese Participants With Chronic Pain Due to Diabetic Neuropathic Pain or Postherpetic Neuralgia. 2010.
48. Simpson RW, Wlodarczyk JH. Transdermal Buprenorphine Relieves Neuropathic Pain: a Randomized, Double-Blind, Parallel-Group, Placebo-Controlled Trial in Diabetic Peripheral Neuropathic Pain. 2016;39(9):1493-1500.
49. Zin CS, Nissen LM, O'Callaghan JP, Duffull SB, Smith MT, Moore BJ. A randomized, controlled trial of oxycodone versus placebo in patients with postherpetic neuralgia and painful diabetic neuropathy treated with pregabalin. 2010;11(5):462-471.

## Rubefacients

50. Backonja M, Wallace MS, Blonsky ER, et al. NGX-4010, a high-concentration capsaicin patch, for the treatment of postherpetic neuralgia: a randomised, double-blind study. 2008;7(12):1106-1112.
51. Bernstein JE, Korman NJ, Bickers DR, Dahl MV, Millikan LE. Topical capsaicin treatment of chronic postherpetic neuralgia. 1989;21(2 Pt 1):265-270.
52. Dailey IGE, Muchmore DP, Springer JW, et al. Effect of treatment with capsaicin on daily activities of patients with painful diabetic neuropathy. *Diabetes Care*. 1992;15(2):159-165.
53. Irving GA, Backonja MM, Duntzman E, et al. A multicenter, randomized, double-blind, controlled study of NGX-4010, a high-concentration capsaicin patch, for the treatment of postherpetic neuralgia. 2011;12(1):99-109.
54. Moon JY, Lee PB, Kim YC, Lee SC, Nahm FS, Choi E. Efficacy and Safety of 0.625% and 1.25% Capsaicin Patch in Peripheral Neuropathic Pain: multi-Center, Randomized, and Semi-Double Blind Controlled Study. 2017;20(2):27-35.
55. Simpson DM, Robinson-Papp J, Van J, et al. Capsaicin 8% Patch in Painful Diabetic Peripheral Neuropathy: a Randomized, Double-Blind, Placebo-Controlled Study. 2017;18(1):42-53.
56. Tandan R, Lewis GA, Krusinski PB, Badger GB, Fries TJ. Topical capsaicin in painful diabetic neuropathy. Controlled study with long-term follow-up. 1992;15(1):8-14.
57. Vinik AI, Perrot S, Vinik EJ, et al. Capsaicin 8% patch repeat treatment versus standard of care in painful diabetic peripheral neuropathy: a randomised, open-label, 52-week study. 2015;58(1 SUPPL. 1):S514-S515.

58. Watson CP, Tyler KL, Bickers DR, Millikan LE, Smith S, Coleman E. A randomized vehicle-controlled trial of topical capsaicin in the treatment of postherpetic neuralgia. *1993;15(3):510-526.*
59. Webster LR, Tark M, Rauck R, Tobias JK, Vanhove GF. Effect of duration of postherpetic neuralgia on efficacy analyses in a multicenter, randomized, controlled study of NGX-4010, an 8% capsaicin patch evaluated for the treatment of postherpetic neuralgia. *2010;10:92.*

### **Serotonin Reuptake Inhibitors (SNRIs)**

60. Allen R, Sharma U, Barlas S. Clinical experience with desvenlafaxine in treatment of pain associated with diabetic peripheral neuropathy. *2014;7:339-351.*
61. Gao Y, Guo X, Han P, et al. The treatment of patients with diabetic peripheral neuropathic pain in China: A double-blind randomized trial of duloxetine versus placebo. *Diabetes/Metabolism Research and Reviews.* 2014;30(SUPPL. 3):30-31.
62. Gao Y, Ning G, Jia WP, et al. Duloxetine versus placebo in the treatment of patients with diabetic neuropathic pain in China. *2010;123(22):3184-3192.*
63. Goldstein DJ, Lu Y, Detke MJ, Lee TC, Iyengar S. Duloxetine vs. placebo in patients with painful diabetic neuropathy. *2005;116(1-2):109-118.*
64. Raskin J, Pritchett YL, Wang F, et al. A double-blind, randomized multicenter trial comparing duloxetine with placebo in the management of diabetic peripheral neuropathic pain. *2005;6(5):346-356.*
65. Rowbotham MC, Goli V, Kunz NR, Lei D. Erratum: Venlafaxine extended release in the treatment of painful diabetic neuropathy: A double-blind, placebo-controlled study (*Pain (2004) 110 (697-706) PII: S0304-3959(03)00017-4 and 10.1016/j.pain.2004.05.010*). *Pain.* 2005;113(1-2):248.
66. Wernicke JF, Pritchett YL, D'Souza DN, et al. A randomized controlled trial of duloxetine in diabetic peripheral neuropathic pain. *2006;67(8):1411-1420.*
67. Yasuda H, Hotta N, Nakao K, Kasuga M, Kashiwagi A, Kawamori R. Superiority of duloxetine to placebo in improving painful diabetic neuropathic pain: results of a randomized controlled trial in Japan. *2011;2(2):132-139.*

### **Tricyclic Antidepressants (TCAs)**

68. Achar A, Chatterjee G, Ray TG, Naskar B. Comparative study of clinical efficacy with amitriptyline, pregabalin, and amitriptyline plus pregabalin combination in postherpetic neuralgia. *Indian journal of dermatology, venereology and leprology.* 2010;76(1):63-65.
69. Shabbir B, Shafi F, Mahboob F. Amitriptyline vs pregabalin in painful diabetic neuropathy a randomised placebo-based study. *2011;5(4):745-747.*
